# Supplementary material
Source: publisher figshare collection journal article supplement (https://acs.figshare.com/ndownloader/files/10943144)
Supplement: Supplementary file 1 [file 10943144]

 
data_8a 
  
_audit_creation_method            'SHELXL-2014/7' 
_shelx_SHELXL_version_number      '2014/7' 
_chemical_name_systematic         [t-Bu2(2-(OCH3)C6H4)P]Pd(syn-3-CH3norborn-2-yl)NH(4-F-2-(OCH3)C6H3) 
_chemical_name_common             8a 
_chemical_melting_point           ? 
_chemical_formula_moiety          ? 
_chemical_formula_sum 
 'C30 H45 F N O2 P Pd' 
_chemical_formula_weight          608.04 
  
loop_ 
 _atom_type_symbol 
 _atom_type_description 
 _atom_type_scat_dispersion_real 
 _atom_type_scat_dispersion_imag 
 _atom_type_scat_source 
 'C'  'C'   0.0033   0.0016 
 'International Tables Vol C Tables 4.2.6.8 and 6.1.1.4' 
 'H'  'H'   0.0000   0.0000 
 'International Tables Vol C Tables 4.2.6.8 and 6.1.1.4' 
 'N'  'N'   0.0061   0.0033 
 'International Tables Vol C Tables 4.2.6.8 and 6.1.1.4' 
 'O'  'O'   0.0106   0.0060 
 'International Tables Vol C Tables 4.2.6.8 and 6.1.1.4' 
 'F'  'F'   0.0171   0.0103 
 'International Tables Vol C Tables 4.2.6.8 and 6.1.1.4' 
 'P'  'P'   0.1023   0.0942 
 'International Tables Vol C Tables 4.2.6.8 and 6.1.1.4' 
 'Pd'  'Pd'  -0.9988   1.0072 
 'International Tables Vol C Tables 4.2.6.8 and 6.1.1.4' 
  
_space_group_crystal_system       monoclinic 
_space_group_IT_number            14 
_space_group_name_H-M_alt         'P 21/c' 
_space_group_name_Hall            '-P 2ybc' 

_diffrn_refln_scan_width          2.0 
_diffrn_refln_scan_rate           10 
_space_group.centring_type        primitive 
  
_shelx_space_group_comment 
; 
The symmetry employed for this shelxl refinement is uniquely defined 
by the following loop, which should always be used as a source of 
symmetry information in preference to the above space-group names. 
They are only intended as comments. 
; 
  
loop_ 
 _space_group_symop_operation_xyz 
 'x, y, z' 
 '-x, y+1/2, -z+1/2' 
 '-x, -y, -z' 
 'x, -y-1/2, z-1/2' 
  
_cell_length_a                    8.2454(7) 
_cell_length_b                    16.8060(14) 
_cell_length_c                    21.3582(18) 
_cell_angle_alpha                 90 
_cell_angle_beta                  99.868(2) 
_cell_angle_gamma                 90 
_cell_volume                      2915.9(4) 
_cell_formula_units_Z             4 
_cell_measurement_temperature     100(2) 
_cell_measurement_reflns_used     9226 
_cell_measurement_theta_min       2.28 
_cell_measurement_theta_max       25.35 
  
_exptl_crystal_description        prism 
_exptl_crystal_colour             yellow 
_exptl_crystal_density_meas       ? 
_exptl_crystal_density_method     ? 
_exptl_crystal_density_diffrn     1.385 
_exptl_crystal_F_000              1272 
_exptl_transmission_factor_min    ? 
_exptl_transmission_factor_max    ? 
_exptl_crystal_size_max           0.140 
_exptl_crystal_size_mid           0.120 
_exptl_crystal_size_min           0.080 
_exptl_absorpt_coefficient_mu     0.724 
_shelx_estimated_absorpt_T_min    0.905 
_shelx_estimated_absorpt_T_max    0.944 
_exptl_absorpt_correction_type    multi-scan 
_exptl_absorpt_correction_T_min   0.759 
_exptl_absorpt_correction_T_max   0.862 
_exptl_absorpt_process_details    SADABS 
_exptl_absorpt_special_details    ? 
_diffrn_ambient_temperature       100(2) 
_diffrn_radiation_wavelength      0.71073 
_diffrn_radiation_type            MoK\a 
_diffrn_source                    'fine focus sealed tube' 
_diffrn_measurement_device_type   'Bruker APEX-I CCD' 
_diffrn_measurement_method        '\f and \w scans' 
_diffrn_detector_area_resol_mean  8.366 
_diffrn_reflns_number             96975 
_diffrn_reflns_av_unetI/netI      0.0181 
_diffrn_reflns_av_R_equivalents   0.0472 
_diffrn_reflns_limit_h_min        -9 
_diffrn_reflns_limit_h_max        9 
_diffrn_reflns_limit_k_min        -20 
_diffrn_reflns_limit_k_max        20 
_diffrn_reflns_limit_l_min        -25 
_diffrn_reflns_limit_l_max        25 
_diffrn_reflns_theta_min          1.551 
_diffrn_reflns_theta_max          25.366 
_diffrn_reflns_theta_full         25.000 
_diffrn_measured_fraction_theta_max   0.998 
_diffrn_measured_fraction_theta_full  1.000 
_diffrn_reflns_Laue_measured_fraction_max    0.998 
_diffrn_reflns_Laue_measured_fraction_full   1.000 
_diffrn_reflns_point_group_measured_fraction_max   0.998 
_diffrn_reflns_point_group_measured_fraction_full  1.000 
_reflns_number_total              5328 
_reflns_number_gt                 4826 
_reflns_threshold_expression      'I > 2\s(I)' 
_reflns_Friedel_coverage          0.000 
_reflns_Friedel_fraction_max      . 
_reflns_Friedel_fraction_full     . 
  
_reflns_special_details 
; 
 Reflections were merged by SHELXL according to the crystal 
 class for the calculation of statistics and refinement. 
  
 _reflns_Friedel_fraction is defined as the number of unique 
 Friedel pairs measured divided by the number that would be 
 possible theoretically, ignoring centric projections and 
 systematic absences. 
; 
  
_computing_data_collection        'Bruker APEX2' 
_computing_cell_refinement        'Bruker SAINT' 
_computing_data_reduction         'Bruker SAINT' 
_computing_structure_solution     'SHELXT-2014' 
_computing_structure_refinement   'SHELXL-2014' 
_computing_molecular_graphics     'ORTEP-32' 
_computing_publication_material   'WinGX' 
_refine_special_details           ? 
_refine_ls_structure_factor_coef  Fsqd 
_refine_ls_matrix_type            full 
_refine_ls_weighting_scheme       calc 
_refine_ls_weighting_details 
'w=1/[\s^2^(Fo^2^)+(0.0337P)^2^+7.3568P] where P=(Fo^2^+2Fc^2^)/3' 
_atom_sites_solution_primary      iterative 
_atom_sites_solution_secondary    difmap 
_atom_sites_solution_hydrogens    geom 
_refine_ls_hydrogen_treatment     constr 
_refine_ls_extinction_method      none 
_refine_ls_extinction_coef        . 
_refine_ls_number_reflns          5328 
_refine_ls_number_parameters      334 
_refine_ls_number_restraints      0 
_refine_ls_R_factor_all           0.0449 
_refine_ls_R_factor_gt            0.0394 
_refine_ls_wR_factor_ref          0.0924 
_refine_ls_wR_factor_gt           0.0886 
_refine_ls_goodness_of_fit_ref    1.098 
_refine_ls_restrained_S_all       1.098 
_refine_ls_shift/su_max           0.001 
_refine_ls_shift/su_mean          0.000 
  
loop_ 
 _atom_site_label 
 _atom_site_type_symbol 
 _atom_site_fract_x 
 _atom_site_fract_y 
 _atom_site_fract_z 
 _atom_site_U_iso_or_equiv 
 _atom_site_adp_type 
 _atom_site_occupancy 
 _atom_site_site_symmetry_order 
 _atom_site_calc_flag 
 _atom_site_refinement_flags_posn 
 _atom_site_refinement_flags_adp 
 _atom_site_refinement_flags_occupancy 
 _atom_site_disorder_assembly 
 _atom_site_disorder_group 
C1 C 0.4890(4) 0.77499(18) 0.44597(15) 0.0235(7) Uani 1 1 d . . . . . 
H1 H 0.4785 0.8311 0.4603 0.028 Uiso 1 1 calc R U . . . 
C2 C 0.4141(5) 0.7726(2) 0.37489(17) 0.0354(8) Uani 1 1 d . . . . . 
H2 H 0.2955 0.7567 0.3653 0.042 Uiso 1 1 calc R U . . . 
C3 C 0.4539(5) 0.8535(2) 0.34684(18) 0.0395(9) Uani 1 1 d . . . . . 
H3A H 0.4209 0.8982 0.3721 0.047 Uiso 1 1 calc R U . . . 
H3B H 0.3981 0.8590 0.3022 0.047 Uiso 1 1 calc R U . . . 
C4 C 0.6439(5) 0.8502(2) 0.35139(18) 0.0357(8) Uani 1 1 d . . . . . 
H4A H 0.6759 0.8591 0.3093 0.043 Uiso 1 1 calc R U . . . 
H4B H 0.6989 0.8904 0.3817 0.043 Uiso 1 1 calc R U . . . 
C5 C 0.6872(5) 0.7650(2) 0.37552(17) 0.0347(8) Uani 1 1 d . . . . . 
H5 H 0.7917 0.7435 0.3643 0.042 Uiso 1 1 calc R U . . . 
C6 C 0.5308(5) 0.7191(2) 0.34556(17) 0.0385(9) Uani 1 1 d . . . . . 
H6A H 0.5105 0.7210 0.2985 0.046 Uiso 1 1 calc R U . . . 
H6B H 0.5304 0.6633 0.3604 0.046 Uiso 1 1 calc R U . . . 
C7 C 0.6764(4) 0.7600(2) 0.44701(16) 0.0282(7) Uani 1 1 d . . . . . 
H7 H 0.7388 0.8060 0.4690 0.034 Uiso 1 1 calc R U . . . 
C8 C 0.7512(5) 0.6835(2) 0.47798(19) 0.0357(8) Uani 1 1 d . . . . . 
H8A H 0.7146 0.6381 0.4503 0.053 Uiso 1 1 calc R U . . . 
H8B H 0.7156 0.6761 0.5191 0.053 Uiso 1 1 calc R U . . . 
H8C H 0.8716 0.6871 0.4845 0.053 Uiso 1 1 calc R U . . . 
C9 C 0.2571(4) 0.59060(19) 0.39078(15) 0.0254(7) Uani 1 1 d . . . . . 
C10 C 0.0952(4) 0.61874(19) 0.38046(16) 0.0266(7) Uani 1 1 d . . . . . 
H10 H 0.0611 0.6522 0.4116 0.032 Uiso 1 1 calc R U . . . 
C11 C -0.0186(4) 0.5996(2) 0.32611(16) 0.0295(7) Uani 1 1 d . . . . . 
H11 H -0.1284 0.6190 0.3207 0.035 Uiso 1 1 calc R U . . . 
C12 C 0.0321(4) 0.5524(2) 0.28090(16) 0.0289(7) Uani 1 1 d . . . . . 
C13 C 0.1893(4) 0.52199(18) 0.28745(15) 0.0257(7) Uani 1 1 d . . . . . 
H13 H 0.2210 0.4893 0.2553 0.031 Uiso 1 1 calc R U . . . 
C14 C 0.3002(4) 0.54018(18) 0.34187(15) 0.0250(7) Uani 1 1 d . . . . . 
C15 C 0.5096(5) 0.4622(2) 0.30777(17) 0.0346(8) Uani 1 1 d . . . . . 
H15A H 0.4414 0.4141 0.3034 0.052 Uiso 1 1 calc R U . . . 
H15B H 0.6253 0.4475 0.3212 0.052 Uiso 1 1 calc R U . . . 
H15C H 0.4965 0.4900 0.2669 0.052 Uiso 1 1 calc R U . . . 
C16 C 0.2169(4) 0.74729(17) 0.62918(15) 0.0199(6) Uani 1 1 d . . . . . 
C17 C 0.1773(4) 0.78086(19) 0.68480(16) 0.0272(7) Uani 1 1 d . . . . . 
H17 H 0.2141 0.8332 0.6964 0.033 Uiso 1 1 calc R U . . . 
C18 C 0.0861(4) 0.7401(2) 0.72330(17) 0.0299(7) Uani 1 1 d . . . . . 
H18 H 0.0625 0.7637 0.7611 0.036 Uiso 1 1 calc R U . . . 
C19 C 0.0302(4) 0.6644(2) 0.70571(17) 0.0294(7) Uani 1 1 d . . . . . 
H19 H -0.0335 0.6362 0.7315 0.035 Uiso 1 1 calc R U . . . 
C20 C 0.0656(4) 0.62936(19) 0.65132(16) 0.0265(7) Uani 1 1 d . . . . . 
H20 H 0.0247 0.5777 0.6394 0.032 Uiso 1 1 calc R U . . . 
C21 C 0.1616(4) 0.66985(18) 0.61383(14) 0.0207(6) Uani 1 1 d . . . . . 
C22 C 0.1541(5) 0.5555(2) 0.54496(17) 0.0349(8) Uani 1 1 d . . . . . 
H22A H 0.1924 0.5198 0.5808 0.052 Uiso 1 1 calc R U . . . 
H22B H 0.1988 0.5378 0.5077 0.052 Uiso 1 1 calc R U . . . 
H22C H 0.0335 0.5544 0.5353 0.052 Uiso 1 1 calc R U . . . 
C23 C 0.2126(4) 0.8887(2) 0.54703(17) 0.0292(7) Uani 1 1 d . . . . . 
C24 C 0.1212(5) 0.9283(2) 0.5953(2) 0.0425(10) Uani 1 1 d . . . . . 
H24A H 0.0543 0.9723 0.5748 0.064 Uiso 1 1 calc R U . . . 
H24B H 0.2011 0.9487 0.6309 0.064 Uiso 1 1 calc R U . . . 
H24C H 0.0497 0.8891 0.6110 0.064 Uiso 1 1 calc R U . . . 
C25 C 0.0863(5) 0.8550(2) 0.4921(2) 0.0524(12) Uani 1 1 d . . . . . 
H25A H 0.0262 0.8110 0.5077 0.079 Uiso 1 1 calc R U . . . 
H25B H 0.1436 0.8356 0.4585 0.079 Uiso 1 1 calc R U . . . 
H25C H 0.0086 0.8969 0.4750 0.079 Uiso 1 1 calc R U . . . 
C26 C 0.3157(4) 0.95273(19) 0.52081(17) 0.0282(7) Uani 1 1 d . . . . . 
H26A H 0.2430 0.9946 0.5001 0.042 Uiso 1 1 calc R U . . . 
H26B H 0.3758 0.9287 0.4898 0.042 Uiso 1 1 calc R U . . . 
H26C H 0.3942 0.9757 0.5558 0.042 Uiso 1 1 calc R U . . . 
C27 C 0.5358(4) 0.8279(2) 0.63283(15) 0.0234(7) Uani 1 1 d . . . . . 
C28 C 0.5978(4) 0.7518(2) 0.66824(16) 0.0293(7) Uani 1 1 d . . . . . 
H28A H 0.7058 0.7618 0.6943 0.044 Uiso 1 1 calc R U . . . 
H28B H 0.6076 0.7096 0.6375 0.044 Uiso 1 1 calc R U . . . 
H28C H 0.5199 0.7354 0.6956 0.044 Uiso 1 1 calc R U . . . 
C29 C 0.6658(4) 0.8538(2) 0.59352(16) 0.0297(8) Uani 1 1 d . . . . . 
H29A H 0.7688 0.8664 0.6221 0.045 Uiso 1 1 calc R U . . . 
H29B H 0.6267 0.9010 0.5684 0.045 Uiso 1 1 calc R U . . . 
H29C H 0.6850 0.8105 0.5649 0.045 Uiso 1 1 calc R U . . . 
C30 C 0.5198(4) 0.8946(2) 0.68083(16) 0.0311(8) Uani 1 1 d . . . . . 
H30A H 0.4428 0.8780 0.7086 0.047 Uiso 1 1 calc R U . . . 
H30B H 0.4786 0.9430 0.6579 0.047 Uiso 1 1 calc R U . . . 
H30C H 0.6279 0.9052 0.7066 0.047 Uiso 1 1 calc R U . . . 
N1 N 0.3681(4) 0.60772(16) 0.44407(13) 0.0272(6) Uani 1 1 d . . . . . 
H1A H 0.4487 0.5734 0.4547 0.033 Uiso 1 1 calc R U . . . 
O1 O 0.2093(3) 0.63558(12) 0.56139(10) 0.0255(5) Uani 1 1 d . . . . . 
O2 O 0.4596(3) 0.51300(14) 0.35396(11) 0.0314(5) Uani 1 1 d . . . . . 
F1 F -0.0771(3) 0.53256(13) 0.22685(10) 0.0409(5) Uani 1 1 d . . . . . 
P1 P 0.34226(9) 0.79891(4) 0.57748(4) 0.01682(16) Uani 1 1 d . . . . . 
Pd1 Pd 0.36727(3) 0.70512(2) 0.50206(2) 0.02195(9) Uani 1 1 d . . . . . 
  
loop_ 
 _atom_site_aniso_label 
 _atom_site_aniso_U_11 
 _atom_site_aniso_U_22 
 _atom_site_aniso_U_33 
 _atom_site_aniso_U_23 
 _atom_site_aniso_U_13 
 _atom_site_aniso_U_12 
C1 0.0296(17) 0.0184(15) 0.0231(16) -0.0028(12) 0.0058(13) -0.0053(13) 
C2 0.039(2) 0.039(2) 0.0269(18) 0.0034(15) 0.0012(15) -0.0108(17) 
C3 0.044(2) 0.040(2) 0.032(2) 0.0139(17) 0.0026(17) -0.0072(18) 
C4 0.047(2) 0.0306(19) 0.0325(19) -0.0020(15) 0.0159(17) -0.0135(17) 
C5 0.044(2) 0.0311(19) 0.0334(19) -0.0013(15) 0.0184(16) -0.0026(16) 
C6 0.061(3) 0.036(2) 0.0202(17) -0.0050(15) 0.0126(17) -0.0186(18) 
C7 0.0301(18) 0.0268(17) 0.0296(18) -0.0042(14) 0.0104(14) -0.0028(14) 
C8 0.0302(19) 0.036(2) 0.042(2) 0.0004(17) 0.0109(16) 0.0039(16) 
C9 0.0333(18) 0.0195(16) 0.0250(17) 0.0006(13) 0.0093(14) -0.0067(14) 
C10 0.0355(19) 0.0197(16) 0.0269(17) 0.0002(13) 0.0116(14) -0.0028(14) 
C11 0.0300(18) 0.0235(17) 0.0357(19) 0.0066(14) 0.0074(15) 0.0001(14) 
C12 0.0361(19) 0.0251(17) 0.0238(17) 0.0038(13) 0.0003(14) -0.0072(15) 
C13 0.040(2) 0.0157(15) 0.0234(16) -0.0003(12) 0.0106(14) -0.0057(14) 
C14 0.0317(18) 0.0172(15) 0.0271(17) 0.0006(13) 0.0081(14) -0.0033(13) 
C15 0.044(2) 0.0284(18) 0.0311(19) -0.0020(15) 0.0073(16) 0.0139(16) 
C16 0.0177(15) 0.0149(15) 0.0270(16) 0.0023(12) 0.0036(12) 0.0002(12) 
C17 0.0289(18) 0.0197(16) 0.0352(19) -0.0037(14) 0.0118(14) -0.0023(13) 
C18 0.0310(18) 0.0270(18) 0.0351(19) -0.0026(15) 0.0153(15) -0.0005(15) 
C19 0.0265(17) 0.0252(17) 0.040(2) 0.0039(15) 0.0165(15) -0.0019(14) 
C20 0.0272(17) 0.0149(15) 0.0383(19) 0.0002(13) 0.0083(14) -0.0047(13) 
C21 0.0181(15) 0.0202(15) 0.0235(16) -0.0004(13) 0.0025(12) 0.0019(12) 
C22 0.052(2) 0.0202(17) 0.0332(19) -0.0067(14) 0.0100(17) -0.0163(16) 
C23 0.0234(17) 0.0201(16) 0.044(2) 0.0081(15) 0.0054(15) 0.0026(13) 
C24 0.034(2) 0.0257(19) 0.073(3) 0.0163(19) 0.026(2) 0.0102(16) 
C25 0.036(2) 0.032(2) 0.079(3) 0.016(2) -0.022(2) -0.0019(17) 
C26 0.0342(18) 0.0162(16) 0.0354(19) 0.0046(14) 0.0093(15) 0.0005(14) 
C27 0.0211(16) 0.0264(17) 0.0223(16) 0.0002(13) 0.0025(12) -0.0018(13) 
C28 0.0257(17) 0.036(2) 0.0254(17) 0.0014(15) 0.0028(13) 0.0043(15) 
C29 0.0202(16) 0.042(2) 0.0264(17) -0.0018(15) 0.0027(13) -0.0099(15) 
C30 0.0333(19) 0.0310(19) 0.0289(18) -0.0077(15) 0.0055(15) -0.0082(15) 
N1 0.0334(16) 0.0185(13) 0.0278(15) -0.0068(11) -0.0001(12) -0.0024(12) 
O1 0.0340(13) 0.0152(11) 0.0280(12) -0.0050(9) 0.0076(10) -0.0093(9) 
O2 0.0326(13) 0.0294(13) 0.0316(13) -0.0083(10) 0.0037(10) 0.0032(10) 
F1 0.0411(12) 0.0468(13) 0.0303(11) -0.0040(10) -0.0066(9) -0.0006(10) 
P1 0.0160(4) 0.0129(4) 0.0210(4) 0.0002(3) 0.0017(3) -0.0015(3) 
Pd1 0.02557(15) 0.01851(14) 0.02204(14) -0.00317(9) 0.00482(10) -0.00467(10) 
  
_geom_special_details 
; 
 All esds (except the esd in the dihedral angle between two l.s. planes) 
 are estimated using the full covariance matrix.  The cell esds are taken 
 into account individually in the estimation of esds in distances, angles 
 and torsion angles; correlations between esds in cell parameters are only 
 used when they are defined by crystal symmetry.  An approximate (isotropic) 
 treatment of cell esds is used for estimating esds involving l.s. planes. 
; 
  
loop_ 
 _geom_bond_atom_site_label_1 
 _geom_bond_atom_site_label_2 
 _geom_bond_distance 
 _geom_bond_site_symmetry_2 
 _geom_bond_publ_flag 
C1 C2 1.538(5) . ? 
C1 C7 1.562(5) . ? 
C1 Pd1 2.057(3) . ? 
C1 H1 1.0000 . ? 
C2 C6 1.527(6) . ? 
C2 C3 1.544(5) . ? 
C2 H2 1.0000 . ? 
C3 C4 1.554(5) . ? 
C3 H3A 0.9900 . ? 
C3 H3B 0.9900 . ? 
C4 C5 1.544(5) . ? 
C4 H4A 0.9900 . ? 
C4 H4B 0.9900 . ? 
C5 C6 1.544(5) . ? 
C5 C7 1.547(5) . ? 
C5 H5 1.0000 . ? 
C6 H6A 0.9900 . ? 
C6 H6B 0.9900 . ? 
C7 C8 1.527(5) . ? 
C7 H7 1.0000 . ? 
C8 H8A 0.9800 . ? 
C8 H8B 0.9800 . ? 
C8 H8C 0.9800 . ? 
C9 N1 1.363(4) . ? 
C9 C10 1.398(5) . ? 
C9 C14 1.436(4) . ? 
C10 C11 1.399(5) . ? 
C10 H10 0.9500 . ? 
C11 C12 1.370(5) . ? 
C11 H11 0.9500 . ? 
C12 F1 1.378(4) . ? 
C12 C13 1.378(5) . ? 
C13 C14 1.384(5) . ? 
C13 H13 0.9500 . ? 
C14 O2 1.374(4) . ? 
C15 O2 1.418(4) . ? 
C15 H15A 0.9800 . ? 
C15 H15B 0.9800 . ? 
C15 H15C 0.9800 . ? 
C16 C21 1.399(4) . ? 
C16 C17 1.403(4) . ? 
C16 P1 1.852(3) . ? 
C17 C18 1.387(5) . ? 
C17 H17 0.9500 . ? 
C18 C19 1.382(5) . ? 
C18 H18 0.9500 . ? 
C19 C20 1.378(5) . ? 
C19 H19 0.9500 . ? 
C20 C21 1.396(4) . ? 
C20 H20 0.9500 . ? 
C21 O1 1.375(4) . ? 
C22 O1 1.445(4) . ? 
C22 H22A 0.9800 . ? 
C22 H22B 0.9800 . ? 
C22 H22C 0.9800 . ? 
C23 C24 1.529(5) . ? 
C23 C26 1.536(4) . ? 
C23 C25 1.538(5) . ? 
C23 P1 1.898(3) . ? 
C24 H24A 0.9800 . ? 
C24 H24B 0.9800 . ? 
C24 H24C 0.9800 . ? 
C25 H25A 0.9800 . ? 
C25 H25B 0.9800 . ? 
C25 H25C 0.9800 . ? 
C26 H26A 0.9800 . ? 
C26 H26B 0.9800 . ? 
C26 H26C 0.9800 . ? 
C27 C28 1.528(5) . ? 
C27 C29 1.533(4) . ? 
C27 C30 1.540(5) . ? 
C27 P1 1.880(3) . ? 
C28 H28A 0.9800 . ? 
C28 H28B 0.9800 . ? 
C28 H28C 0.9800 . ? 
C29 H29A 0.9800 . ? 
C29 H29B 0.9800 . ? 
C29 H29C 0.9800 . ? 
C30 H30A 0.9800 . ? 
C30 H30B 0.9800 . ? 
C30 H30C 0.9800 . ? 
N1 Pd1 2.053(3) . ? 
N1 H1A 0.8800 . ? 
O1 Pd1 2.288(2) . ? 
P1 Pd1 2.2881(8) . ? 
  
loop_ 
 _geom_angle_atom_site_label_1 
 _geom_angle_atom_site_label_2 
 _geom_angle_atom_site_label_3 
 _geom_angle 
 _geom_angle_site_symmetry_1 
 _geom_angle_site_symmetry_3 
 _geom_angle_publ_flag 
C2 C1 C7 103.8(3) . . ? 
C2 C1 Pd1 114.0(2) . . ? 
C7 C1 Pd1 118.7(2) . . ? 
C2 C1 H1 106.6 . . ? 
C7 C1 H1 106.6 . . ? 
Pd1 C1 H1 106.6 . . ? 
C6 C2 C1 104.2(3) . . ? 
C6 C2 C3 99.7(3) . . ? 
C1 C2 C3 106.5(3) . . ? 
C6 C2 H2 114.9 . . ? 
C1 C2 H2 114.9 . . ? 
C3 C2 H2 114.9 . . ? 
C2 C3 C4 103.0(3) . . ? 
C2 C3 H3A 111.2 . . ? 
C4 C3 H3A 111.2 . . ? 
C2 C3 H3B 111.2 . . ? 
C4 C3 H3B 111.2 . . ? 
H3A C3 H3B 109.1 . . ? 
C5 C4 C3 103.1(3) . . ? 
C5 C4 H4A 111.1 . . ? 
C3 C4 H4A 111.1 . . ? 
C5 C4 H4B 111.1 . . ? 
C3 C4 H4B 111.1 . . ? 
H4A C4 H4B 109.1 . . ? 
C6 C5 C4 101.3(3) . . ? 
C6 C5 C7 101.4(3) . . ? 
C4 C5 C7 109.3(3) . . ? 
C6 C5 H5 114.5 . . ? 
C4 C5 H5 114.5 . . ? 
C7 C5 H5 114.5 . . ? 
C2 C6 C5 94.4(3) . . ? 
C2 C6 H6A 112.8 . . ? 
C5 C6 H6A 112.8 . . ? 
C2 C6 H6B 112.8 . . ? 
C5 C6 H6B 112.8 . . ? 
H6A C6 H6B 110.3 . . ? 
C8 C7 C5 112.7(3) . . ? 
C8 C7 C1 117.9(3) . . ? 
C5 C7 C1 101.6(3) . . ? 
C8 C7 H7 108.1 . . ? 
C5 C7 H7 108.1 . . ? 
C1 C7 H7 108.1 . . ? 
C7 C8 H8A 109.5 . . ? 
C7 C8 H8B 109.5 . . ? 
H8A C8 H8B 109.5 . . ? 
C7 C8 H8C 109.5 . . ? 
H8A C8 H8C 109.5 . . ? 
H8B C8 H8C 109.5 . . ? 
N1 C9 C10 123.1(3) . . ? 
N1 C9 C14 121.2(3) . . ? 
C10 C9 C14 115.7(3) . . ? 
C9 C10 C11 122.7(3) . . ? 
C9 C10 H10 118.7 . . ? 
C11 C10 H10 118.7 . . ? 
C12 C11 C10 118.4(3) . . ? 
C12 C11 H11 120.8 . . ? 
C10 C11 H11 120.8 . . ? 
C11 C12 F1 119.7(3) . . ? 
C11 C12 C13 122.6(3) . . ? 
F1 C12 C13 117.6(3) . . ? 
C12 C13 C14 118.5(3) . . ? 
C12 C13 H13 120.7 . . ? 
C14 C13 H13 120.7 . . ? 
O2 C14 C13 123.9(3) . . ? 
O2 C14 C9 114.0(3) . . ? 
C13 C14 C9 122.1(3) . . ? 
O2 C15 H15A 109.5 . . ? 
O2 C15 H15B 109.5 . . ? 
H15A C15 H15B 109.5 . . ? 
O2 C15 H15C 109.5 . . ? 
H15A C15 H15C 109.5 . . ? 
H15B C15 H15C 109.5 . . ? 
C21 C16 C17 117.3(3) . . ? 
C21 C16 P1 119.3(2) . . ? 
C17 C16 P1 123.4(2) . . ? 
C18 C17 C16 122.1(3) . . ? 
C18 C17 H17 118.9 . . ? 
C16 C17 H17 118.9 . . ? 
C19 C18 C17 118.9(3) . . ? 
C19 C18 H18 120.6 . . ? 
C17 C18 H18 120.6 . . ? 
C20 C19 C18 120.9(3) . . ? 
C20 C19 H19 119.5 . . ? 
C18 C19 H19 119.5 . . ? 
C19 C20 C21 119.9(3) . . ? 
C19 C20 H20 120.1 . . ? 
C21 C20 H20 120.1 . . ? 
O1 C21 C20 122.2(3) . . ? 
O1 C21 C16 116.9(3) . . ? 
C20 C21 C16 120.9(3) . . ? 
O1 C22 H22A 109.5 . . ? 
O1 C22 H22B 109.5 . . ? 
H22A C22 H22B 109.5 . . ? 
O1 C22 H22C 109.5 . . ? 
H22A C22 H22C 109.5 . . ? 
H22B C22 H22C 109.5 . . ? 
C24 C23 C26 108.0(3) . . ? 
C24 C23 C25 109.1(3) . . ? 
C26 C23 C25 108.9(3) . . ? 
C24 C23 P1 115.4(2) . . ? 
C26 C23 P1 111.5(2) . . ? 
C25 C23 P1 103.7(2) . . ? 
C23 C24 H24A 109.5 . . ? 
C23 C24 H24B 109.5 . . ? 
H24A C24 H24B 109.5 . . ? 
C23 C24 H24C 109.5 . . ? 
H24A C24 H24C 109.5 . . ? 
H24B C24 H24C 109.5 . . ? 
C23 C25 H25A 109.5 . . ? 
C23 C25 H25B 109.5 . . ? 
H25A C25 H25B 109.5 . . ? 
C23 C25 H25C 109.5 . . ? 
H25A C25 H25C 109.5 . . ? 
H25B C25 H25C 109.5 . . ? 
C23 C26 H26A 109.5 . . ? 
C23 C26 H26B 109.5 . . ? 
H26A C26 H26B 109.5 . . ? 
C23 C26 H26C 109.5 . . ? 
H26A C26 H26C 109.5 . . ? 
H26B C26 H26C 109.5 . . ? 
C28 C27 C29 107.6(3) . . ? 
C28 C27 C30 109.8(3) . . ? 
C29 C27 C30 107.8(3) . . ? 
C28 C27 P1 105.7(2) . . ? 
C29 C27 P1 109.1(2) . . ? 
C30 C27 P1 116.5(2) . . ? 
C27 C28 H28A 109.5 . . ? 
C27 C28 H28B 109.5 . . ? 
H28A C28 H28B 109.5 . . ? 
C27 C28 H28C 109.5 . . ? 
H28A C28 H28C 109.5 . . ? 
H28B C28 H28C 109.5 . . ? 
C27 C29 H29A 109.5 . . ? 
C27 C29 H29B 109.5 . . ? 
H29A C29 H29B 109.5 . . ? 
C27 C29 H29C 109.5 . . ? 
H29A C29 H29C 109.5 . . ? 
H29B C29 H29C 109.5 . . ? 
C27 C30 H30A 109.5 . . ? 
C27 C30 H30B 109.5 . . ? 
H30A C30 H30B 109.5 . . ? 
C27 C30 H30C 109.5 . . ? 
H30A C30 H30C 109.5 . . ? 
H30B C30 H30C 109.5 . . ? 
C9 N1 Pd1 126.9(2) . . ? 
C9 N1 H1A 116.5 . . ? 
Pd1 N1 H1A 116.5 . . ? 
C21 O1 C22 117.8(2) . . ? 
C21 O1 Pd1 120.44(18) . . ? 
C22 O1 Pd1 121.80(19) . . ? 
C14 O2 C15 116.9(3) . . ? 
C16 P1 C27 104.28(14) . . ? 
C16 P1 C23 103.73(14) . . ? 
C27 P1 C23 112.16(15) . . ? 
C16 P1 Pd1 102.94(10) . . ? 
C27 P1 Pd1 116.86(10) . . ? 
C23 P1 Pd1 114.82(12) . . ? 
N1 Pd1 C1 92.94(12) . . ? 
N1 Pd1 O1 89.32(9) . . ? 
C1 Pd1 O1 174.19(11) . . ? 
N1 Pd1 P1 169.67(8) . . ? 
C1 Pd1 P1 97.38(9) . . ? 
O1 Pd1 P1 80.40(6) . . ? 
  
_refine_diff_density_max    1.654 
_refine_diff_density_min   -0.785 
_refine_diff_density_rms    0.085 
  
_shelx_res_file 
; 
  
    shelx.res created by SHELXL-2014/7 
  
TITL hartwig122_0m_a.res in P2(1)/c 
CELL  0.71073   8.2454  16.8060  21.3582   90.000   99.868   90.000 
ZERR     4.00   0.0007   0.0014   0.0018    0.000    0.002    0.000 
LATT   1 
SYMM  - X, 1/2 + Y, 1/2 - Z 
SFAC  C    H    N    O    F    P    PD 
UNIT  120 180 4 8 4 4 4 
MERG   2 
FMAP   2 
PLAN   20 
SIZE     0.080   0.120   0.140 
ACTA    50.00 
BOND   $H 
LIST   4 
WPDB  -2 
L.S.  10 
TEMP  -173.00 
WGHT    0.033700    7.356801 
FVAR       0.10706 
C1    1    0.488959    0.774986    0.445974    11.00000    0.02958    0.01835 = 
         0.02308   -0.00276    0.00575   -0.00534 
AFIX  13 
H1    2    0.478496    0.831138    0.460252    11.00000   -1.20000 
AFIX   0 
C2    1    0.414069    0.772566    0.374887    11.00000    0.03913    0.03852 = 
         0.02688    0.00336    0.00118   -0.01083 
AFIX  13 
H2    2    0.295528    0.756673    0.365319    11.00000   -1.20000 
AFIX   0 
C3    1    0.453948    0.853468    0.346842    11.00000    0.04449    0.04019 = 
         0.03226    0.01393    0.00255   -0.00722 
AFIX  23 
H3A   2    0.420901    0.898215    0.372057    11.00000   -1.20000 
H3B   2    0.398084    0.858962    0.302178    11.00000   -1.20000 
AFIX   0 
C4    1    0.643909    0.850223    0.351394    11.00000    0.04719    0.03060 = 
         0.03247   -0.00196    0.01591   -0.01345 
AFIX  23 
H4A   2    0.675939    0.859121    0.309342    11.00000   -1.20000 
H4B   2    0.698898    0.890388    0.381720    11.00000   -1.20000 
AFIX   0 
C5    1    0.687171    0.764959    0.375523    11.00000    0.04379    0.03115 = 
         0.03344   -0.00130    0.01844   -0.00263 
AFIX  13 
H5    2    0.791683    0.743523    0.364339    11.00000   -1.20000 
AFIX   0 
C6    1    0.530794    0.719116    0.345558    11.00000    0.06146    0.03590 = 
         0.02021   -0.00500    0.01257   -0.01856 
AFIX  23 
H6A   2    0.510512    0.721023    0.298535    11.00000   -1.20000 
H6B   2    0.530364    0.663333    0.360423    11.00000   -1.20000 
AFIX   0 
C7    1    0.676388    0.759979    0.447005    11.00000    0.03007    0.02685 = 
         0.02957   -0.00419    0.01038   -0.00277 
AFIX  13 
H7    2    0.738798    0.805965    0.469005    11.00000   -1.20000 
AFIX   0 
C8    1    0.751220    0.683472    0.477982    11.00000    0.03024    0.03627 = 
         0.04217    0.00035    0.01095    0.00391 
AFIX 137 
H8A   2    0.714561    0.638132    0.450295    11.00000   -1.50000 
H8B   2    0.715560    0.676110    0.519071    11.00000   -1.50000 
H8C   2    0.871565    0.687074    0.484458    11.00000   -1.50000 
AFIX   0 
C9    1    0.257118    0.590596    0.390781    11.00000    0.03328    0.01950 = 
         0.02496    0.00059    0.00930   -0.00668 
C10   1    0.095210    0.618739    0.380459    11.00000    0.03548    0.01971 = 
         0.02695    0.00017    0.01160   -0.00284 
AFIX  43 
H10   2    0.061053    0.652202    0.411611    11.00000   -1.20000 
AFIX   0 
C11   1   -0.018619    0.599633    0.326108    11.00000    0.03005    0.02346 = 
         0.03566    0.00658    0.00738    0.00012 
AFIX  43 
H11   2   -0.128407    0.618964    0.320697    11.00000   -1.20000 
AFIX   0 
C12   1    0.032088    0.552385    0.280899    11.00000    0.03608    0.02508 = 
         0.02380    0.00376    0.00027   -0.00722 
C13   1    0.189346    0.521989    0.287445    11.00000    0.03980    0.01574 = 
         0.02339   -0.00029    0.01064   -0.00574 
AFIX  43 
H13   2    0.220956    0.489273    0.255314    11.00000   -1.20000 
AFIX   0 
C14   1    0.300198    0.540182    0.341866    11.00000    0.03174    0.01718 = 
         0.02707    0.00057    0.00812   -0.00332 
C15   1    0.509556    0.462208    0.307768    11.00000    0.04444    0.02838 = 
         0.03114   -0.00201    0.00732    0.01387 
AFIX 137 
H15A  2    0.441393    0.414095    0.303365    11.00000   -1.50000 
H15B  2    0.625302    0.447474    0.321163    11.00000   -1.50000 
H15C  2    0.496480    0.489950    0.266852    11.00000   -1.50000 
AFIX   0 
C16   1    0.216935    0.747290    0.629177    11.00000    0.01766    0.01494 = 
         0.02703    0.00226    0.00362    0.00024 
C17   1    0.177281    0.780855    0.684795    11.00000    0.02895    0.01972 = 
         0.03524   -0.00370    0.01178   -0.00235 
AFIX  43 
H17   2    0.214070    0.833219    0.696446    11.00000   -1.20000 
AFIX   0 
C18   1    0.086132    0.740059    0.723300    11.00000    0.03103    0.02699 = 
         0.03511   -0.00264    0.01526   -0.00054 
AFIX  43 
H18   2    0.062525    0.763703    0.761129    11.00000   -1.20000 
AFIX   0 
C19   1    0.030215    0.664424    0.705711    11.00000    0.02653    0.02521 = 
         0.04032    0.00387    0.01649   -0.00190 
AFIX  43 
H19   2   -0.033489    0.636226    0.731480    11.00000   -1.20000 
AFIX   0 
C20   1    0.065592    0.629363    0.651321    11.00000    0.02724    0.01487 = 
         0.03829    0.00025    0.00826   -0.00472 
AFIX  43 
H20   2    0.024737    0.577720    0.639361    11.00000   -1.20000 
AFIX   0 
C21   1    0.161553    0.669849    0.613828    11.00000    0.01811    0.02020 = 
         0.02348   -0.00039    0.00249    0.00185 
C22   1    0.154056    0.555453    0.544964    11.00000    0.05223    0.02016 = 
         0.03322   -0.00672    0.01002   -0.01634 
AFIX 137 
H22A  2    0.192376    0.519850    0.580787    11.00000   -1.50000 
H22B  2    0.198847    0.537752    0.507664    11.00000   -1.50000 
H22C  2    0.033518    0.554427    0.535300    11.00000   -1.50000 
AFIX   0 
C23   1    0.212594    0.888682    0.547029    11.00000    0.02339    0.02005 = 
         0.04405    0.00811    0.00537    0.00263 
C24   1    0.121245    0.928271    0.595280    11.00000    0.03431    0.02565 = 
         0.07336    0.01629    0.02592    0.01023 
AFIX 137 
H24A  2    0.054299    0.972310    0.574843    11.00000   -1.50000 
H24B  2    0.201142    0.948742    0.630938    11.00000   -1.50000 
H24C  2    0.049746    0.889135    0.610983    11.00000   -1.50000 
AFIX   0 
C25   1    0.086303    0.854998    0.492053    11.00000    0.03551    0.03177 = 
         0.07893    0.01612   -0.02169   -0.00191 
AFIX 137 
H25A  2    0.026249    0.810986    0.507683    11.00000   -1.50000 
H25B  2    0.143581    0.835597    0.458457    11.00000   -1.50000 
H25C  2    0.008590    0.896944    0.474982    11.00000   -1.50000 
AFIX   0 
C26   1    0.315742    0.952725    0.520813    11.00000    0.03421    0.01619 = 
         0.03544    0.00459    0.00928    0.00048 
AFIX 137 
H26A  2    0.242958    0.994636    0.500141    11.00000   -1.50000 
H26B  2    0.375845    0.928681    0.489792    11.00000   -1.50000 
H26C  2    0.394245    0.975726    0.555778    11.00000   -1.50000 
AFIX   0 
C27   1    0.535836    0.827880    0.632828    11.00000    0.02106    0.02637 = 
         0.02231    0.00018    0.00250   -0.00175 
C28   1    0.597830    0.751845    0.668236    11.00000    0.02575    0.03615 = 
         0.02537    0.00137    0.00282    0.00435 
AFIX 137 
H28A  2    0.705796    0.761762    0.694305    11.00000   -1.50000 
H28B  2    0.607559    0.709583    0.637482    11.00000   -1.50000 
H28C  2    0.519907    0.735413    0.695634    11.00000   -1.50000 
AFIX   0 
C29   1    0.665805    0.853771    0.593519    11.00000    0.02020    0.04208 = 
         0.02637   -0.00182    0.00272   -0.00987 
AFIX 137 
H29A  2    0.768788    0.866418    0.622061    11.00000   -1.50000 
H29B  2    0.626686    0.900956    0.568448    11.00000   -1.50000 
H29C  2    0.685010    0.810486    0.564924    11.00000   -1.50000 
AFIX   0 
C30   1    0.519819    0.894607    0.680831    11.00000    0.03334    0.03102 = 
         0.02892   -0.00767    0.00545   -0.00818 
AFIX 137 
H30A  2    0.442804    0.878015    0.708552    11.00000   -1.50000 
H30B  2    0.478607    0.943011    0.657881    11.00000   -1.50000 
H30C  2    0.627854    0.905248    0.706602    11.00000   -1.50000 
AFIX   0 
N1    3    0.368133    0.607724    0.444067    11.00000    0.03340    0.01849 = 
         0.02782   -0.00675   -0.00010   -0.00243 
AFIX  43 
H1A   2    0.448712    0.573392    0.454741    11.00000   -1.20000 
AFIX   0 
O1    4    0.209257    0.635584    0.561395    11.00000    0.03401    0.01517 = 
         0.02798   -0.00496    0.00756   -0.00926 
O2    4    0.459627    0.512997    0.353957    11.00000    0.03263    0.02937 = 
         0.03163   -0.00830    0.00366    0.00320 
F1    5   -0.077139    0.532561    0.226848    11.00000    0.04112    0.04681 = 
         0.03034   -0.00404   -0.00658   -0.00058 
P1    6    0.342264    0.798909    0.577476    11.00000    0.01601    0.01294 = 
         0.02100    0.00023    0.00168   -0.00154 
PD1   7    0.367271    0.705122    0.502055    11.00000    0.02557    0.01851 = 
         0.02204   -0.00317    0.00482   -0.00467 
HKLF    4 
  
REM  hartwig122_0m_a.res in P2(1)/c 
REM R1 =  0.0394 for    4826 Fo > 4sig(Fo)  and  0.0449 for all    5328 data 
REM    334 parameters refined using      0 restraints 
  
END 
  
WGHT      0.0333      7.4333 
  
REM Highest difference peak  1.654,  deepest hole -0.785,  1-sigma level  0.085 
Q1    1   0.3003  0.7349  0.4797  11.00000  0.05    1.65 
Q2    1   0.3932  0.7978  0.4284  11.00000  0.05    0.76 
Q3    1   0.3734  0.8831  0.5055  11.00000  0.05    0.65 
Q4    1   0.3749  0.8386  0.3776  11.00000  0.05    0.59 
Q5    1   0.8925  0.7069  0.4884  11.00000  0.05    0.58 
Q6    1   0.5950  0.7428  0.3974  11.00000  0.05    0.49 
Q7    1   0.3447  0.6134  0.5757  11.00000  0.05    0.49 
Q8    1   0.9152  0.7963  0.4146  11.00000  0.05    0.46 
Q9    1   0.2011  0.8276  0.3660  11.00000  0.05    0.41 
Q10   1   0.4328  0.7407  0.5157  11.00000  0.05    0.39 
Q11   1   0.7306  0.8187  0.3892  11.00000  0.05    0.39 
Q12   1   0.3183  0.7543  0.5502  11.00000  0.05    0.38 
Q13   1  -0.0944  0.8832  0.4967  11.00000  0.05    0.37 
Q14   1   0.4566  0.8210  0.6120  11.00000  0.05    0.36 
Q15   1   0.4958  0.6018  0.4379  11.00000  0.05    0.35 
Q16   1   0.4609  0.6816  0.5492  11.00000  0.05    0.33 
Q17   1   0.0058  0.7450  0.6968  11.00000  0.05    0.33 
Q18   1   0.1736  0.6576  0.5923  11.00000  0.05    0.32 
Q19   1   0.3153  0.6368  0.4196  11.00000  0.05    0.32 
Q20   1   0.3240  0.5720  0.4401  11.00000  0.05    0.32 
; 
_shelx_res_checksum    4564 
  
_shelx_hkl_file 
; 
  -1   0   0  475.19   19.15 
  -1   0   0  475.09   19.15 
  -1   0   0  470.45   19.13 
  -1   0   0  485.72   19.16 
  -1   0   0  467.04   19.15 
  -1   0   0  475.41   19.15 
   1   0   0  456.48   19.24 
   1   0   0  453.41   19.14 
   1   0   0  479.38   19.26 
   1   0   0  458.42   19.18 
   1   0   0  443.99   19.24 
   1   0   0  461.30   19.15 
   1   0   0  464.71   19.15 
   1   0   0  461.84   19.15 
   1   0   0  468.44   19.15 
   1   0   0  456.83   19.15 
  -1   0   0  471.52   19.18 
  -1   0   0  464.20   19.25 
  -1   0   0  472.59   19.26 
  -1   0   0  465.37   19.25 
   2   0   0    3.50    0.34 
   2   0   0    3.39    0.40 
   2   0   0    4.01    0.30 
   2   0   0    3.85    0.29 
   2   0   0    4.30    0.31 
   2   0   0    3.43    0.41 
   2   0   0    4.05    0.27 
   2   0   0    4.11    0.30 
   2   0   0    4.52    0.31 
   2   0   0    3.62    0.44 
  -2   0   0    3.60    0.34 
  -2   0   0    3.63    0.30 
  -2   0   0    4.11    0.30 
   3   0   0  150.36    6.80 
   3   0   0  154.27    6.50 
   3   0   0  157.81    6.53 
   3   0   0  153.67    6.52 
   3   0   0  154.17    6.52 
   3   0   0  154.26    6.80 
   3   0   0  155.71    6.61 
   3   0   0  151.98    6.82 
   3   0   0  155.28    6.45 
   4   0   0  117.17    5.44 
   4   0   0  116.58    5.06 
   4   0   0  111.76    5.42 
   4   0   0  114.91    5.01 
   4   0   0  115.02    5.05 
   4   0   0  118.57    5.47 
   4   0   0  119.48    5.06 
   4   0   0  120.43    5.18 
   4   0   0  118.23    4.93 
   5   0   0    3.48    0.45 
   5   0   0    4.00    0.46 
   5   0   0    3.01    0.43 
   5   0   0    3.63    0.83 
   5   0   0    2.21    0.70 
   5   0   0    4.55    0.60 
   5   0   0    3.27    0.78 
   5   0   0    3.64    0.44 
   6   0   0   45.91    2.90 
   6   0   0   49.55    2.44 
   6   0   0   48.04    2.99 
   6   0   0   51.38    2.45 
   6   0   0   51.95    2.44 
   6   0   0   48.46    2.59 
   6   0   0   51.55    2.47 
   7   0   0  153.68    6.89 
   7   0   0  154.13    7.64 
   7   0   0  159.54    6.92 
   7   0   0  168.90    7.74 
   7   0   0  156.03    6.89 
   7   0   0  154.87    6.86 
   8   0   0   13.35    1.00 
   8   0   0    9.75    1.56 
   8   0   0   16.35    1.66 
   8   0   0   13.60    1.04 
   9   0   0   -0.42    0.61 
  -9   0   0    1.44    1.03 
   9   0   0    0.00    0.40 
   9   0   0   -0.71    0.79 
   9   0   0    0.20    0.35 
   0  -1   0    0.14    0.05 
   0   1   0    0.22    0.06 
   0   1   0    0.27    0.05 
   0   1   0    0.29    0.05 
   0   1   0    0.21    0.06 
   0   1   0    0.37    0.08 
   0   1   0    0.22    0.06 
   0   1   0    0.29    0.06 
   0   1   0    0.20    0.07 
   1  -1   0  705.14   31.00 
   1  -1   0  756.21   30.97 
  -1  -1   0  774.81   31.00 
   1  -1   0  749.44   30.97 
   1  -1   0  717.62   30.96 
   1  -1   0  759.65   30.96 
   1  -1   0  744.02   31.03 
   1  -1   0  743.70   30.95 
  -1  -1   0  766.07   30.98 
   1  -1   0  757.64   31.04 
   1  -1   0  751.91   30.96 
  -1  -1   0  782.83   30.98 
  -1  -1   0  772.42   31.02 
   1  -1   0  719.82   30.97 
  -1   1   0  790.97   30.97 
  -1   1   0  753.46   30.96 
  -1   1   0  782.25   31.05 
  -1   1   0  775.56   31.03 
  -1   1   0  754.98   30.95 
  -1   1   0  735.72   30.97 
  -1   1   0  720.88   31.03 
  -1   1   0  758.46   31.00 
  -1   1   0  783.00   30.98 
  -1   1   0  748.91   30.96 
   1   1   0  671.61   30.96 
  -1   1   0  764.57   30.97 
   1   1   0  739.44   30.99 
  -1   1   0  802.56   30.98 
  -1   1   0  776.57   30.97 
   1   1   0  749.98   30.98 
   2  -1   0    6.19    0.45 
   2  -1   0    5.78    0.53 
   2  -1   0    6.39    0.41 
   2  -1   0    5.96    0.53 
   2  -1   0    5.45    0.42 
  -2  -1   0    5.93    0.49 
   2  -1   0    6.86    0.46 
  -2  -1   0    6.32    0.37 
   2  -1   0    5.98    0.53 
   2  -1   0    5.11    0.42 
   2  -1   0    6.72    0.45 
   2  -1   0    6.45    0.43 
   2   1   0    6.71    0.53 
  -2   1   0    6.31    0.49 
   2   1   0    6.54    0.48 
   2   1   0    6.15    0.34 
   2   1   0    6.14    0.31 
  -2   1   0    6.17    0.43 
  -2   1   0    5.64    0.44 
  -2   1   0    5.60    0.44 
  -2   1   0    5.42    0.42 
   2   1   0    6.23    0.34 
   2   1   0    5.94    0.52 
  -2   1   0    5.88    0.44 
   2   1   0    6.03    0.34 
   2   1   0    6.65    0.35 
   2   1   0    5.66    0.51 
   3  -1   0  173.18    7.34 
   3  -1   0  173.78    7.59 
   3  -1   0  172.66    7.60 
   3  -1   0  179.36    7.35 
   3  -1   0  171.07    7.34 
   3  -1   0  176.71    7.35 
   3  -1   0  173.31    7.33 
   3  -1   0  171.14    7.60 
   3  -1   0  173.72    7.33 
   3   1   0  170.32    7.17 
  -3   1   0  175.68    7.33 
  -3   1   0  173.92    7.34 
   3   1   0  170.53    7.22 
  -3   1   0  173.87    7.40 
  -3   1   0  169.31    7.35 
   3   1   0  166.30    7.56 
   3   1   0  174.09    7.21 
  -3   1   0  177.29    7.35 
   3   1   0  167.21    7.53 
   3   1   0  171.86    7.22 
   3   1   0  167.68    7.52 
   3   1   0  173.99    7.41 
   3   1   0  175.25    7.22 
   4  -1   0    1.11    0.27 
   4  -1   0    1.21    0.32 
   4  -1   0    1.23    0.32 
   4  -1   0    0.97    0.32 
   4  -1   0    1.38    0.33 
   4  -1   0    1.07    0.32 
   4  -1   0    1.05    0.42 
   4  -1   0    1.03    0.42 
   4  -1   0    1.22    0.33 
   4   1   0    1.11    0.25 
   4   1   0    1.58    0.26 
   4   1   0    1.45    0.25 
   4   1   0    0.62    0.42 
   4   1   0    1.49    0.27 
   4   1   0    1.82    0.44 
   4   1   0    1.16    0.37 
   4   1   0    1.25    0.42 
   5  -1   0   95.87    4.40 
   5  -1   0   95.30    4.82 
   5  -1   0   93.99    4.40 
   5  -1   0   97.62    4.26 
   5  -1   0   97.20    4.44 
   5  -1   0   91.71    4.38 
   5  -1   0   91.16    4.80 
   5   1   0  104.50    4.30 
   5   1   0  102.92    4.54 
   5   1   0   93.13    4.79 
   5   1   0   98.94    4.80 
   5   1   0  101.26    4.26 
   5   1   0   98.36    4.27 
   5   1   0   96.75    4.79 
   5   1   0  102.47    4.29 
   6  -1   0  151.67    6.69 
   6  -1   0  150.45    6.66 
   6  -1   0  154.53    6.39 
   6  -1   0  144.08    7.22 
   6  -1   0  157.65    6.70 
   6  -1   0  151.91    6.67 
   6  -1   0  144.93    6.36 
   6  -1   0  151.78    7.26 
   6   1   0  144.82    7.14 
   6   1   0  151.36    6.53 
   6   1   0  155.59    6.50 
   6   1   0  150.77    6.54 
   6   1   0  153.73    6.82 
   6   1   0  158.33    6.54 
   6   1   0  140.48    7.17 
   6   1   0  156.71    7.24 
   7  -1   0    4.61    0.93 
   7  -1   0    3.88    1.07 
   7  -1   0    3.95    0.66 
   7  -1   0    3.56    0.65 
   7  -1   0    3.00    0.61 
   7   1   0    3.56    0.56 
   7   1   0    2.32    0.91 
   7   1   0    3.54    0.83 
   7   1   0    2.82    0.45 
   7   1   0    3.46    0.52 
   7   1   0    3.12    0.51 
   8  -1   0   15.32    1.72 
   8  -1   0   20.04    1.33 
   8  -1   0   15.20    1.85 
   8  -1   0   18.23    1.33 
   8   1   0   18.30    1.18 
   8   1   0   19.49    1.94 
   8   1   0   20.32    1.06 
   8   1   0   19.25    1.08 
   8   1   0   13.72    1.73 
  -8   1   0   15.52    2.06 
   9  -1   0   16.51    2.00 
  -9  -1   0   16.34    2.00 
   9  -1   0   17.30    1.29 
   9  -1   0   15.27    1.22 
   9  -1   0   14.53    1.81 
   9   1   0   17.64    1.13 
   9   1   0   16.66    1.98 
  -9   1   0   17.44    2.05 
   9   1   0   21.58    2.12 
   0  -2   0  779.90   30.94 
   0  -2   0  737.14   31.07 
   0  -2   0  775.05   30.98 
   0  -2   0  751.67   30.94 
   0  -2   0  760.42   30.96 
   0  -2   0  774.92   30.93 
   0  -2   0  781.41   30.91 
   0  -2   0  754.40   30.94 
   0  -2   0  630.80   30.89 
   0  -2   0  803.86   30.98 
   0  -2   0  857.18   31.00 
   0  -2   0  787.26   30.94 
   0  -2   0  756.41   30.94 
   0  -2   0  731.38   30.93 
   0  -2   0  755.49   30.93 
   0  -2   0  681.26   30.90 
   0   2   0  780.75   30.94 
   0   2   0  686.43   30.99 
   0   2   0  753.66   30.96 
   0   2   0  776.44   30.94 
   0   2   0  746.38   31.10 
   0   2   0  770.62   30.93 
   0   2   0  749.48   30.93 
   0   2   0  750.77   30.93 
   0   2   0  739.12   30.93 
   0   2   0  734.16   30.92 
   0   2   0  770.64   30.93 
   0   2   0  674.12   30.90 
   0   2   0  790.71   30.99 
   0   2   0  739.85   30.98 
   1  -2   0  472.63   19.02 
  -1  -2   0  454.17   19.10 
   1  -2   0  455.36   19.07 
  -1  -2   0  469.45   19.01 
   1  -2   0  475.86   19.07 
  -1  -2   0  431.78   18.92 
   1  -2   0  451.04   19.07 
  -1  -2   0  465.29   18.96 
   1  -2   0  442.66   19.06 
  -1  -2   0  455.98   18.93 
  -1  -2   0  466.88   19.07 
   1  -2   0  431.77   19.03 
   1  -2   0  474.86   19.11 
  -1  -2   0  464.32   19.01 
   1  -2   0  486.16   19.08 
  -1  -2   0  445.22   18.93 
  -1  -2   0  470.22   19.03 
  -1  -2   0  479.08   18.99 
   1  -2   0  472.35   19.07 
   1  -2   0  461.21   19.11 
  -1  -2   0  437.78   19.11 
  -1  -2   0  464.97   18.95 
   1  -2   0  452.49   19.11 
   1  -2   0  475.13   19.12 
  -1  -2   0  458.00   19.01 
  -1  -2   0  479.45   19.01 
   1  -2   0  459.48   19.07 
   1  -2   0  453.50   19.07 
  -1   2   0  463.16   19.07 
  -1   2   0  465.10   19.04 
   1   2   0  469.85   18.98 
   1   2   0  461.72   18.95 
   1   2   0  454.89   18.95 
  -1   2   0  486.04   19.07 
  -1   2   0  461.48   19.07 
  -1   2   0  439.52   19.06 
  -1   2   0  470.47   19.08 
  -1   2   0  454.41   19.09 
   1   2   0  463.52   18.95 
  -1   2   0  468.39   19.08 
  -1   2   0  452.06   19.07 
   1   2   0  463.75   18.96 
  -1   2   0  459.40   19.07 
  -1   2   0  464.83   19.24 
   1   2   0  454.81   18.95 
  -1   2   0  446.60   19.03 
   1   2   0  469.19   19.07 
  -1   2   0  443.35   19.13 
  -1   2   0  456.47   19.11 
   1   2   0  469.41   18.96 
   1   2   0  473.57   19.01 
   2  -2   0   33.13    1.69 
   2  -2   0   34.99    1.72 
   2  -2   0   34.31    1.67 
   2  -2   0   33.77    1.68 
   2  -2   0   35.64    1.67 
   2  -2   0   31.32    1.69 
   2  -2   0   33.72    1.81 
   2  -2   0   34.08    1.70 
   2  -2   0   32.11    1.81 
   2  -2   0   34.00    1.70 
   2   2   0   38.02    1.80 
  -2   2   0   32.98    1.70 
  -2   2   0   33.58    1.65 
   2   2   0   38.27    1.50 
   2   2   0   38.18    1.53 
   2   2   0   37.33    1.74 
   2   2   0   38.19    1.53 
  -2   2   0   34.18    1.83 
  -2   2   0   34.46    1.59 
  -2   2   0   33.29    1.69 
  -2   2   0   34.16    1.75 
   2   2   0   36.24    1.52 
   2   2   0   38.76    1.77 
  -2   2   0   33.14    1.69 
   2   2   0   37.98    1.52 
  -2   2   0   35.78    1.72 
   2   2   0   35.81    1.73 
   3  -2   0  199.81    8.24 
   3  -2   0  186.01    8.23 
   3  -2   0  195.87    8.18 
   3  -2   0  189.25    8.14 
   3  -2   0  193.23    8.22 
   3  -2   0  193.29    8.23 
   3  -2   0  186.63    8.44 
   3  -2   0  186.45    8.43 
   3  -2   0  187.02    8.22 
  -3   2   0  192.70    8.23 
   3   2   0  198.87    8.01 
  -3   2   0  197.30    8.25 
  -3   2   0  197.66    8.22 
   3   2   0  178.18    8.30 
   3   2   0  192.41    8.39 
  -3   2   0  196.40    8.31 
   3   2   0  196.83    7.99 
   3   2   0  199.35    7.99 
  -3   2   0  187.71    8.23 
   3   2   0  201.62    8.30 
   3   2   0  193.34    8.01 
   3   2   0  189.07    8.34 
   4  -2   0  179.33    7.66 
   4  -2   0  182.20    7.61 
   4  -2   0  177.15    7.63 
   4  -2   0  173.87    7.97 
   4  -2   0  168.71    7.63 
   4  -2   0  163.92    7.92 
   4  -2   0  184.05    7.65 
   4  -2   0  169.87    7.63 
   4   2   0  169.91    7.89 
   4   2   0  179.44    7.39 
   4   2   0  176.80    7.86 
   4   2   0  181.01    7.74 
   4   2   0  178.11    7.40 
   4   2   0  180.66    7.42 
  -4   2   0  176.21    7.67 
  -4   2   0  175.64    7.73 
   4   2   0  177.09    7.37 
  -4   2   0  179.15    7.67 
   4   2   0  181.10    7.87 
  -4   2   0  181.04    7.73 
   5  -2   0   26.28    1.54 
   5  -2   0   27.47    1.91 
   5  -2   0   25.67    1.49 
   5  -2   0   25.38    1.49 
   5  -2   0   24.69    1.48 
   5  -2   0   26.05    1.43 
   5  -2   0   24.34    1.85 
   5  -2   0   27.44    1.55 
   5  -2   0   27.41    1.54 
   5   2   0   27.72    1.28 
   5   2   0   26.31    1.29 
   5   2   0   25.61    1.60 
   5   2   0   26.49    1.25 
   5   2   0   25.61    1.73 
   5   2   0   27.55    1.32 
   5   2   0   25.87    1.75 
   5   2   0   25.70    1.78 
   6  -2   0   15.12    1.54 
   6  -2   0   14.82    1.02 
   6  -2   0   13.69    1.14 
   6  -2   0   15.08    1.18 
   6  -2   0   16.17    1.50 
   6  -2   0   16.63    1.20 
   6  -2   0   15.51    1.14 
   6   2   0   17.05    1.51 
   6   2   0   17.16    0.88 
   6   2   0   18.58    0.92 
   6   2   0   15.17    1.40 
   6   2   0   19.14    1.01 
  -6   2   0   13.71    1.49 
   6   2   0   17.27    0.95 
   6   2   0   20.41    1.07 
   6   2   0   16.07    1.45 
   7  -2   0   56.27    2.62 
   7  -2   0   53.84    3.46 
   7  -2   0   54.85    2.60 
   7  -2   0   54.35    3.48 
   7  -2   0   55.27    2.95 
   7  -2   0   57.89    2.97 
   7   2   0   59.10    2.66 
   7   2   0   60.16    2.54 
   7   2   0   60.91    2.71 
   7   2   0   58.93    3.45 
   7   2   0   60.55    2.82 
  -7   2   0   52.87    3.55 
   7   2   0   61.20    3.50 
   7   2   0   59.81    2.53 
   7   2   0   53.88    3.41 
   8  -2   0   16.29    1.88 
   8  -2   0   16.97    1.31 
   8  -2   0   16.63    1.77 
   8  -2   0   16.58    1.33 
   8   2   0   18.75    1.08 
   8   2   0   19.74    1.79 
   8   2   0   18.15    1.03 
  -8   2   0   13.68    1.78 
   8   2   0   16.21    1.68 
   9  -2   0   -0.58    0.42 
   9  -2   0   -0.09    0.85 
   9  -2   0    0.37    0.89 
   9  -2   0    0.15    0.49 
  -9   2   0    0.11    0.86 
   9   2   0   -0.96    0.62 
   9   2   0    0.38    0.25 
   9   2   0   -0.32    0.74 
   0  -3   0   -0.02    0.11 
   0  -3   0    0.05    0.11 
   0  -3   0   -0.05    0.16 
   0  -3   0    0.17    0.13 
   0  -3   0   -0.05    0.15 
   0  -3   0   -0.07    0.12 
   0  -3   0    0.06    0.17 
   0  -3   0   -0.01    0.12 
   0  -3   0    0.06    0.16 
   0  -3   0    0.06    0.16 
   0  -3   0   -0.01    0.12 
   0  -3   0    0.27    0.21 
   0  -3   0    0.20    0.14 
   0   3   0   -0.04    0.16 
   0   3   0    0.07    0.10 
   0   3   0    0.05    0.12 
   0   3   0    0.06    0.12 
   0   3   0   -0.09    0.11 
   0   3   0    0.04    0.16 
   0   3   0    0.06    0.15 
   0   3   0   -0.03    0.11 
   0   3   0    0.01    0.11 
   0   3   0    0.15    0.17 
   0   3   0    0.03    0.10 
   0   3   0    0.35    0.21 
   0   3   0   -0.02    0.12 
   0   3   0   -0.08    0.11 
  -1  -3   0   10.52    0.78 
  -1  -3   0   10.63    0.64 
   1  -3   0   10.95    0.70 
  -1  -3   0   10.93    0.63 
   1  -3   0   11.79    0.74 
  -1  -3   0   10.78    0.69 
   1  -3   0   10.45    0.69 
  -1  -3   0   10.58    0.61 
  -1  -3   0   10.71    0.59 
  -1  -3   0   11.80    0.63 
   1  -3   0   10.85    0.69 
   1  -3   0   10.63    0.69 
   1  -3   0   12.44    0.72 
   1  -3   0   11.52    0.74 
   1  -3   0   13.62    0.75 
   1  -3   0   10.94    0.76 
   1  -3   0   11.56    0.71 
   1  -3   0   10.90    0.70 
  -1  -3   0   10.75    0.61 
   1  -3   0   11.05    0.71 
  -1   3   0    9.99    0.71 
  -1   3   0   12.66    0.72 
  -1   3   0   10.98    0.70 
  -1   3   0   10.09    0.69 
  -1   3   0   11.46    0.75 
  -1   3   0   12.00    0.73 
   1   3   0   11.38    0.63 
   1   3   0   11.42    0.65 
   1   3   0   11.15    0.61 
   1   3   0   10.55    0.76 
  -1   3   0   12.16    0.84 
  -1   3   0   10.94    0.73 
  -1   3   0   11.68    0.71 
   1   3   0   10.72    0.61 
   1   3   0   10.88    0.60 
   1   3   0   11.25    0.61 
   1   3   0   10.15    0.56 
   1   3   0   11.45    0.56 
   1   3   0   11.58    0.69 
  -1   3   0    8.89    0.72 
   1   3   0   12.02    0.62 
   2  -3   0   97.74    4.38 
   2  -3   0   95.25    4.36 
   2  -3   0   99.01    4.36 
   2  -3   0   99.69    4.38 
   2  -3   0   97.61    4.39 
   2  -3   0   99.13    4.48 
   2  -3   0   98.91    4.38 
   2  -3   0  100.55    4.32 
   2  -3   0  102.97    4.51 
   2  -3   0  102.31    4.39 
   2  -3   0   98.68    4.17 
  -2   3   0  100.12    4.40 
   2   3   0   98.87    4.33 
   2   3   0   98.94    4.19 
  -2   3   0   94.54    4.31 
   2   3   0   98.39    4.13 
  -2   3   0   96.75    4.44 
   2   3   0   99.99    4.15 
   2   3   0  101.31    4.17 
  -2   3   0   99.46    4.38 
  -2   3   0   96.25    4.38 
   2   3   0   99.96    4.17 
  -2   3   0   96.31    4.38 
   2   3   0  100.63    4.41 
   2   3   0   98.57    4.33 
  -2   3   0   98.71    4.47 
   2   3   0  100.53    4.17 
   2   3   0   99.42    4.16 
   3  -3   0   42.85    2.06 
   3  -3   0   44.48    2.01 
   3  -3   0   42.87    2.07 
   3  -3   0   36.05    2.16 
   3  -3   0   42.49    2.07 
   3  -3   0   41.62    2.00 
   3  -3   0   39.13    2.21 
   3  -3   0   41.11    2.05 
   3  -3   0   41.80    2.01 
   3  -3   0   41.32    2.05 
  -3   3   0   41.45    2.08 
   3   3   0   39.10    1.76 
  -3   3   0   38.94    2.04 
   3   3   0   38.64    2.05 
   3   3   0   38.87    1.77 
   3   3   0   40.95    1.75 
   3   3   0   41.18    1.77 
   3   3   0   39.61    2.14 
  -3   3   0   40.60    2.21 
  -3   3   0   39.39    2.03 
  -3   3   0   41.80    2.06 
   3   3   0   39.38    2.07 
   3   3   0   39.46    1.74 
  -3   3   0   41.54    2.13 
  -3   3   0   40.53    1.93 
   4  -3   0    3.60    0.53 
   4  -3   0    3.72    0.53 
   4  -3   0    3.19    0.44 
   4  -3   0    2.66    0.47 
   4  -3   0    3.12    0.59 
   4  -3   0    3.73    0.51 
   4  -3   0    2.57    0.49 
   4  -3   0    3.18    0.59 
  -4   3   0    2.65    0.49 
  -4   3   0    2.68    0.50 
  -4   3   0    2.44    0.54 
   4   3   0    4.07    0.59 
   4   3   0    4.17    0.29 
  -4   3   0    2.41    0.36 
   4   3   0    4.34    0.24 
   4   3   0    4.82    0.30 
   4   3   0    4.03    0.60 
  -4   3   0    2.27    0.46 
   4   3   0    4.28    0.31 
  -4   3   0    2.25    0.63 
  -4   3   0    2.81    0.53 
   4   3   0    4.35    0.23 
   4   3   0    4.34    0.60 
   5  -3   0   52.00    3.09 
   5  -3   0   53.32    2.69 
   5  -3   0   47.16    3.07 
   5  -3   0   46.16    2.71 
   5  -3   0   58.11    2.84 
   5  -3   0   52.98    2.79 
   5  -3   0   52.08    2.76 
   5  -3   0   54.23    2.81 
   5   3   0   59.40    3.04 
   5   3   0   62.37    2.45 
  -5   3   0   54.34    3.17 
   5   3   0   58.45    3.11 
  -5   3   0   48.60    2.50 
   5   3   0   61.64    2.46 
   5   3   0   63.24    3.09 
   5   3   0   62.16    2.52 
   6  -3   0   50.96    2.70 
   6  -3   0   49.76    2.61 
   6  -3   0   49.23    3.05 
   6  -3   0   44.54    2.60 
   6  -3   0   46.91    2.64 
   6  -3   0   49.91    2.54 
   6  -3   0   45.49    2.98 
   6   3   0   52.21    2.24 
   6   3   0   52.68    2.26 
   6   3   0   55.52    3.00 
   6   3   0   48.88    2.99 
   6   3   0   51.80    2.36 
  -6   3   0   43.66    3.07 
   6   3   0   55.29    3.02 
   7  -3   0    1.14    0.54 
   7  -3   0    0.35    0.36 
   7  -3   0    1.31    0.65 
   7  -3   0    1.31    0.55 
   7  -3   0    1.75    0.69 
   7   3   0    1.34    0.29 
   7   3   0    0.89    0.75 
   7   3   0    1.03    0.71 
   7   3   0    1.77    0.81 
  -7   3   0   -0.22    0.59 
   7   3   0    0.95    0.34 
   7   3   0    1.53    0.26 
   8  -3   0    8.27    0.64 
   8  -3   0    9.88    1.08 
   8  -3   0   10.19    1.11 
   8  -3   0    8.40    1.47 
   8  -3   0    7.97    1.30 
   8  -3   0   10.60    0.70 
   8   3   0   10.09    1.43 
   8   3   0   10.63    0.55 
   8   3   0    9.68    0.54 
   8   3   0   10.28    1.41 
  -8   3   0    8.74    1.48 
   9  -3   0   13.63    1.92 
   9  -3   0   13.17    1.27 
   9  -3   0   13.12    1.87 
   9  -3   0   13.18    1.25 
   9   3   0   18.13    1.92 
  -9   3   0   11.20    1.77 
   9   3   0   14.41    1.78 
   0  -4   0   82.99    3.65 
   0  -4   0   76.85    3.58 
   0  -4   0   77.36    3.62 
   0  -4   0   80.98    3.57 
   0  -4   0   78.66    3.70 
   0  -4   0   79.15    3.63 
   0  -4   0   83.16    3.63 
   0  -4   0   81.19    3.60 
   0   4   0   83.50    3.63 
   0   4   0   88.10    3.65 
   0   4   0   82.83    3.72 
   0   4   0   82.86    3.55 
   0   4   0   85.18    3.65 
   0   4   0   78.69    3.63 
   0   4   0   83.55    3.70 
   0   4   0   85.35    3.50 
   0   4   0   78.07    3.67 
   0   4   0   81.16    3.63 
   0   4   0   78.68    3.51 
   0   4   0   84.56    3.63 
   0   4   0   83.55    3.59 
   0   4   0   83.81    3.64 
   0   4   0   83.80    3.62 
   1  -4   0  200.79    8.64 
  -1  -4   0  205.85    8.52 
  -1  -4   0  199.77    8.53 
   1  -4   0  200.44    8.65 
  -1  -4   0  209.16    8.52 
  -1  -4   0  205.40    8.54 
   1  -4   0  202.70    8.63 
   1  -4   0  203.04    8.71 
  -1  -4   0  196.18    8.52 
   1  -4   0  208.33    8.65 
   1  -4   0  202.53    8.65 
   1  -4   0  195.74    8.63 
   1  -4   0  197.37    8.63 
   1  -4   0  207.44    8.64 
  -1  -4   0  203.40    8.55 
  -1  -4   0  209.26    8.74 
   1  -4   0  199.68    8.65 
   1  -4   0  202.44    8.64 
   1  -4   0  203.52    8.65 
   1   4   0  195.65    8.51 
   1   4   0  204.75    8.57 
   1   4   0  203.86    8.52 
   1   4   0  209.50    8.73 
  -1   4   0  199.10    8.64 
   1   4   0  200.05    8.48 
   1   4   0  203.71    8.48 
   1   4   0  203.26    8.53 
   1   4   0  205.08    8.52 
  -1   4   0  206.24    8.63 
  -1   4   0  203.73    8.61 
   1   4   0  211.64    8.60 
   1   4   0  210.15    8.51 
  -1   4   0  199.99    8.64 
   1   4   0  194.91    8.51 
  -1   4   0  196.55    8.62 
   1   4   0  209.82    8.54 
  -1   4   0  192.09    8.62 
   1   4   0  207.86    8.53 
  -1   4   0  199.08    8.70 
   2  -4   0    2.44    0.43 
   2  -4   0    2.41    0.39 
   2  -4   0    2.37    0.33 
   2  -4   0    1.91    0.39 
   2  -4   0    2.47    0.38 
   2  -4   0    2.20    0.37 
   2  -4   0    2.44    0.43 
   2  -4   0    1.68    0.38 
   2  -4   0    2.10    0.45 
  -2  -4   0    3.33    0.47 
   2  -4   0    2.15    0.39 
   2  -4   0    1.97    0.46 
   2   4   0    2.65    0.30 
   2   4   0    2.75    0.28 
   2   4   0    2.85    0.30 
   2   4   0    2.80    0.27 
   2   4   0    2.89    0.28 
  -2   4   0    1.87    0.37 
  -2   4   0    1.70    0.35 
   2   4   0    3.87    0.44 
  -2   4   0    1.76    0.36 
  -2   4   0    1.87    0.46 
  -2   4   0    1.97    0.43 
   2   4   0    3.00    0.30 
  -2   4   0    2.24    0.37 
  -2   4   0    2.23    0.39 
   2   4   0    3.36    0.27 
   3  -4   0    4.89    0.60 
   3  -4   0    3.66    0.55 
   3  -4   0    5.68    0.59 
   3  -4   0    5.36    0.62 
   3  -4   0    4.44    0.61 
   3  -4   0    5.79    0.53 
   3  -4   0    4.09    0.67 
  -3  -4   0    4.86    0.62 
   3  -4   0    3.60    0.53 
   3  -4   0    4.74    0.59 
   3  -4   0    4.21    0.54 
  -3   4   0    5.52    0.62 
   3   4   0    6.43    0.39 
   3   4   0    6.19    0.37 
   3   4   0    5.19    0.58 
  -3   4   0    4.51    0.58 
   3   4   0    5.95    0.35 
  -3   4   0    4.74    0.53 
   3   4   0    5.52    0.58 
  -3   4   0    3.65    0.58 
  -3   4   0    3.79    0.57 
  -3   4   0    4.06    0.65 
  -3   4   0    4.20    0.60 
   3   4   0    5.06    0.61 
   3   4   0    5.48    0.38 
   3   4   0    6.21    0.38 
   4  -4   0   19.63    1.36 
   4  -4   0   21.58    1.57 
   4  -4   0   18.39    1.49 
   4  -4   0   20.49    1.38 
   4  -4   0   22.35    1.33 
   4  -4   0   22.25    1.35 
   4  -4   0   24.80    1.44 
   4  -4   0   18.92    1.38 
   4  -4   0   22.77    1.42 
   4  -4   0   23.31    1.33 
   4   4   0   23.26    1.06 
   4   4   0   22.89    0.97 
   4   4   0   22.89    1.44 
   4   4   0   23.15    1.50 
  -4   4   0   22.75    1.44 
  -4   4   0   23.06    1.41 
   4   4   0   24.08    1.10 
  -4   4   0   22.09    1.31 
  -4   4   0   19.29    1.38 
  -4   4   0   19.58    1.57 
  -4   4   0   20.35    1.46 
   4   4   0   24.59    0.98 
  -4   4   0   23.31    1.44 
   4   4   0   21.86    1.43 
   4   4   0   24.62    1.06 
   5  -4   0    0.48    0.39 
   5  -4   0    0.45    0.38 
   5  -4   0   -0.16    0.35 
   5  -4   0   -0.08    0.25 
   5  -4   0   -0.04    0.33 
   5  -4   0   -0.11    0.31 
   5  -4   0   -0.28    0.28 
   5  -4   0    0.45    0.53 
   5   4   0    0.21    0.12 
  -5   4   0   -0.07    0.28 
  -5   4   0    0.07    0.46 
   5   4   0    0.18    0.12 
  -5   4   0   -0.18    0.36 
   5   4   0    0.17    0.37 
   5   4   0    0.37    0.18 
   5   4   0    0.49    0.39 
   5   4   0    0.37    0.42 
  -5   4   0    0.25    0.39 
  -5   4   0    0.03    0.44 
   6  -4   0    5.83    0.66 
   6  -4   0    6.09    1.07 
   6  -4   0    4.48    0.75 
   6  -4   0    6.17    0.86 
   6  -4   0    4.26    0.86 
   6   4   0    6.49    0.52 
   6   4   0    7.92    1.00 
  -6   4   0    4.95    0.96 
   6   4   0    5.82    0.97 
   6   4   0    6.69    0.36 
   6   4   0    5.82    0.93 
   6   4   0    6.13    0.35 
  -7  -4   0    4.47    1.02 
   7  -4   0    3.74    0.74 
   7  -4   0    3.52    0.80 
   7  -4   0    4.36    0.90 
   7  -4   0    3.28    0.94 
  -7   4   0    2.87    1.12 
   7   4   0    6.10    1.12 
   7   4   0    5.08    1.00 
   7   4   0    4.63    0.97 
   7   4   0    4.72    0.51 
   8  -4   0    0.81    0.67 
   8  -4   0   -0.23    0.35 
   8  -4   0   -0.14    0.57 
   8  -4   0    0.69    0.60 
   8  -4   0    0.42    0.54 
  -8   4   0   -0.41    0.74 
   8   4   0   -0.31    0.64 
   8   4   0    0.53    0.65 
   8   4   0   -0.21    0.59 
   9  -4   0    0.46    0.94 
   9  -4   0    0.06    0.51 
   9  -4   0   -0.18    0.53 
   9  -4   0    0.58    0.58 
   9   4   0    1.92    0.98 
  -9   4   0    0.42    0.95 
   9   4   0    1.47    0.88 
   0  -5   0   -0.13    0.21 
   0  -5   0    0.19    0.18 
   0  -5   0    0.08    0.18 
   0  -5   0   -0.02    0.22 
   0  -5   0   -0.11    0.15 
   0  -5   0   -0.04    0.16 
   0  -5   0    0.03    0.27 
   0   5   0    0.06    0.12 
   0   5   0   -0.08    0.16 
   0   5   0   -0.02    0.17 
   0   5   0   -0.23    0.19 
   0   5   0    0.02    0.13 
   0   5   0    0.05    0.23 
   0   5   0   -0.06    0.20 
   0   5   0    0.01    0.19 
   0   5   0   -0.02    0.17 
   0   5   0    0.27    0.24 
   0   5   0    0.02    0.21 
   0   5   0   -0.19    0.21 
   0   5   0    0.16    0.19 
   0   5   0    0.25    0.24 
   1  -5   0   55.56    2.69 
  -1  -5   0   54.08    2.33 
  -1  -5   0   57.64    2.59 
  -1  -5   0   51.66    2.33 
   1  -5   0   56.09    2.66 
  -1  -5   0   58.75    2.58 
   1  -5   0   52.70    2.66 
  -1  -5   0   55.61    2.55 
   1  -5   0   52.21    2.66 
  -1  -5   0   59.76    2.80 
   1  -5   0   52.37    2.66 
   1  -5   0   56.91    2.65 
  -1  -5   0   54.38    2.56 
  -1  -5   0   57.47    2.58 
   1  -5   0   47.94    2.63 
  -1  -5   0   52.70    2.52 
  -1   5   0   51.34    2.72 
  -1   5   0   58.78    2.73 
   1   5   0   54.39    2.56 
   1   5   0   60.99    2.64 
  -1   5   0   53.29    2.67 
  -1   5   0   55.34    2.67 
  -1   5   0   51.63    2.63 
   1   5   0   57.04    2.52 
  -1   5   0   48.80    2.62 
   1   5   0   59.71    2.57 
   1   5   0   59.37    2.59 
   1   5   0   58.70    2.53 
  -1   5   0   54.63    2.63 
   1   5   0   52.94    2.73 
   1   5   0   56.89    2.56 
   1   5   0   58.09    2.57 
   1   5   0   56.77    2.62 
   1   5   0   61.95    2.55 
   1   5   0   57.56    2.57 
   1   5   0   55.87    2.56 
  -1   5   0   55.17    2.64 
   2  -5   0   34.54    1.97 
  -2  -5   0   38.78    2.09 
  -2  -5   0   36.36    1.87 
   2  -5   0   32.97    1.90 
   2  -5   0   33.68    1.94 
   2  -5   0   34.75    1.97 
   2  -5   0   37.76    2.04 
   2  -5   0   33.75    1.96 
  -2  -5   0   41.37    1.89 
   2  -5   0   40.14    2.00 
   2  -5   0   37.96    2.05 
   2  -5   0   36.27    1.96 
   2  -5   0   34.47    1.96 
   2   5   0   39.01    1.77 
   2   5   0   41.60    1.98 
  -2   5   0   37.32    1.96 
  -2   5   0   37.02    1.99 
  -2   5   0   36.26    1.98 
   2   5   0   37.84    1.77 
   2   5   0   38.94    1.78 
  -2   5   0   38.18    2.01 
   2   5   0   40.47    1.80 
   2   5   0   40.40    1.77 
   2   5   0   38.40    1.82 
   2   5   0   39.14    1.78 
  -2   5   0   37.02    2.07 
  -2   5   0   38.73    2.02 
  -2   5   0   35.78    1.98 
   3  -5   0    5.87    0.70 
   3  -5   0    8.02    0.80 
   3  -5   0    7.06    0.74 
   3  -5   0    6.72    0.69 
   3  -5   0    7.60    0.67 
   3  -5   0    6.25    0.41 
   3  -5   0    5.96    0.65 
  -3  -5   0    6.94    0.76 
   3  -5   0    7.00    0.76 
   3  -5   0    6.78    0.70 
   3  -5   0    5.68    0.63 
   3  -5   0    7.12    0.68 
   3   5   0    6.03    0.46 
   3   5   0    6.78    0.45 
  -3   5   0    5.80    0.78 
   3   5   0    7.07    0.47 
  -3   5   0    5.31    0.64 
   3   5   0    6.09    0.47 
  -3   5   0    5.93    0.66 
  -3   5   0    5.61    0.76 
   3   5   0    6.03    0.40 
   3   5   0    6.63    0.39 
  -3   5   0    6.96    0.73 
  -3   5   0    6.01    0.64 
   3   5   0    5.06    0.64 
  -3   5   0    5.94    0.72 
   3   5   0    7.02    0.46 
   4  -5   0    0.31    0.44 
   4  -5   0   -0.36    0.29 
   4  -5   0   -0.03    0.31 
   4  -5   0    0.14    0.34 
   4  -5   0   -0.24    0.34 
   4  -5   0   -0.10    0.28 
   4  -5   0    0.20    0.35 
   4  -5   0   -0.38    0.31 
  -4  -5   0    0.04    0.40 
   4  -5   0    0.37    0.29 
   4  -5   0   -0.14    0.32 
  -4   5   0   -0.43    0.32 
  -4   5   0   -0.25    0.20 
   4   5   0    0.13    0.11 
   4   5   0    0.00    0.34 
  -4   5   0   -0.33    0.41 
   4   5   0    0.10    0.10 
  -4   5   0   -0.35    0.29 
  -4   5   0   -0.31    0.44 
   4   5   0    0.06    0.13 
  -4   5   0   -0.77    0.32 
   4   5   0    0.08    0.28 
   4   5   0   -0.04    0.23 
   4   5   0    0.29    0.16 
  -4   5   0    0.43    0.33 
   5  -5   0    6.53    0.76 
   5  -5   0    7.55    0.75 
   5  -5   0    6.76    0.95 
   5  -5   0    6.92    0.87 
   5  -5   0    7.95    1.11 
   5  -5   0    7.72    0.90 
  -5  -5   0    8.90    0.99 
   5  -5   0    7.23    0.87 
   5  -5   0    7.88    0.85 
   5  -5   0    8.27    0.85 
   5   5   0    9.38    0.47 
  -5   5   0    8.31    0.84 
   5   5   0    9.38    0.95 
  -5   5   0    6.60    0.97 
   5   5   0    8.35    0.92 
   5   5   0    8.46    0.46 
  -5   5   0    7.06    0.99 
   5   5   0    8.90    1.01 
   5   5   0   10.46    0.60 
   6  -5   0    0.59    0.65 
   6  -5   0    0.22    0.32 
   6  -5   0    1.36    0.57 
  -6  -5   0    0.32    0.58 
   6  -5   0    0.49    0.66 
   6  -5   0    0.21    0.48 
   6   5   0    0.20    0.22 
   6   5   0    0.57    0.62 
  -6   5   0    0.97    0.84 
   6   5   0    1.05    0.54 
   6   5   0    0.25    0.49 
  -7  -5   0    1.09    0.79 
   7  -5   0    0.77    0.54 
   7  -5   0    0.54    0.69 
   7  -5   0    0.43    0.50 
   7  -5   0    0.37    0.67 
   7   5   0    1.17    0.68 
   7   5   0    0.91    0.64 
   7   5   0    1.03    0.30 
  -7   5   0    1.60    0.81 
   7   5   0    0.74    0.70 
   8  -5   0    1.03    0.63 
   8  -5   0    0.92    0.59 
   8  -5   0   -1.43    0.59 
   8  -5   0    0.22    0.80 
   8   5   0    1.92    0.88 
  -8   5   0   -0.75    0.98 
   8   5   0    1.62    0.37 
   8   5   0    1.84    0.77 
   8   5   0    1.31    0.74 
   9  -5   0    3.75    0.60 
   9  -5   0    4.33    1.30 
   9  -5   0    3.80    1.22 
   9  -5   0    4.97    1.03 
   9  -5   0    4.12    0.93 
   9   5   0    5.61    1.06 
  -9   5   0    3.14    1.24 
   9   5   0    5.84    1.21 
   0  -6   0    1.01    0.34 
   0  -6   0    1.07    0.29 
   0  -6   0    0.74    0.28 
   0  -6   0    0.33    0.33 
   0  -6   0    1.06    0.35 
   0  -6   0    0.75    0.29 
   0  -6   0    1.23    0.31 
   0   6   0    1.22    0.32 
   0   6   0    1.06    0.35 
   0   6   0    1.05    0.30 
   0   6   0    1.20    0.28 
   0   6   0    0.86    0.37 
   0   6   0    1.27    0.31 
   0   6   0    0.79    0.34 
   0   6   0    0.83    0.35 
   0   6   0    0.98    0.23 
   0   6   0    0.75    0.19 
   0   6   0    0.64    0.27 
   0   6   0    0.48    0.29 
   0   6   0    0.62    0.28 
   0   6   0    0.84    0.29 
  -1  -6   0    1.39    0.22 
   1  -6   0    0.91    0.34 
  -1  -6   0    1.43    0.30 
  -1  -6   0    0.92    0.29 
   1  -6   0    0.64    0.35 
  -1  -6   0    1.71    0.22 
  -1  -6   0    1.76    0.37 
  -1  -6   0    1.17    0.34 
   1  -6   0    1.74    0.40 
   1  -6   0    1.26    0.29 
   1  -6   0    1.55    0.35 
  -1  -6   0    1.13    0.33 
   1  -6   0    1.49    0.41 
  -1  -6   0    1.58    0.23 
  -1  -6   0    1.44    0.28 
   1  -6   0    1.79    0.38 
  -1  -6   0    0.86    0.36 
   1   6   0    1.38    0.33 
   1   6   0    1.70    0.34 
   1   6   0    1.25    0.34 
  -1   6   0    0.80    0.38 
  -1   6   0    1.39    0.43 
   1   6   0    0.88    0.35 
  -1   6   0    1.10    0.33 
  -1   6   0    1.80    0.37 
  -1   6   0    0.99    0.35 
   1   6   0    1.54    0.35 
   1   6   0    1.16    0.33 
  -1   6   0    1.33    0.36 
   1   6   0    1.00    0.31 
   1   6   0    1.09    0.30 
  -1   6   0    1.22    0.40 
  -1   6   0    0.76    0.33 
   1   6   0    0.83    0.28 
   1   6   0    1.42    0.35 
   1   6   0    1.59    0.34 
   1   6   0    1.42    0.34 
   2  -6   0    1.26    0.39 
   2  -6   0    0.79    0.38 
  -2  -6   0    1.64    0.36 
   2  -6   0    1.39    0.44 
   2  -6   0    0.73    0.39 
  -2  -6   0    1.15    0.32 
  -2  -6   0    1.56    0.47 
  -2  -6   0    1.29    0.30 
   2  -6   0    0.91    0.36 
   2  -6   0    1.13    0.37 
   2  -6   0    1.08    0.37 
   2   6   0    0.97    0.19 
  -2   6   0    1.07    0.36 
   2   6   0    1.18    0.31 
   2   6   0    1.46    0.32 
   2   6   0    1.28    0.31 
  -2   6   0    0.52    0.32 
   2   6   0    1.21    0.29 
  -2   6   0    0.63    0.45 
   2   6   0    1.18    0.30 
   2   6   0    1.15    0.26 
  -2   6   0    1.09    0.44 
  -2   6   0    0.76    0.39 
  -2   6   0    0.54    0.35 
   2   6   0    1.50    0.35 
  -2   6   0    0.73    0.33 
   2   6   0    1.26    0.19 
   2   6   0    1.53    0.40 
   3  -6   0    1.04    0.42 
   3  -6   0    1.11    0.42 
   3  -6   0    1.15    0.42 
   3  -6   0    1.16    0.47 
  -3  -6   0    1.29    0.40 
   3  -6   0    1.54    0.54 
   3  -6   0    0.82    0.40 
   3  -6   0    0.46    0.28 
  -3  -6   0    1.16    0.45 
   3  -6   0    0.92    0.36 
   3  -6   0    0.26    0.41 
   3  -6   0    1.12    0.44 
  -3  -6   0    1.90    0.42 
   3  -6   0    1.08    0.41 
   3   6   0    1.25    0.30 
  -3   6   0    0.84    0.41 
  -3   6   0    0.33    0.41 
  -3   6   0    1.56    0.46 
   3   6   0    1.52    0.30 
   3   6   0    1.49    0.30 
   3   6   0    2.05    0.46 
   3   6   0    0.83    0.26 
  -3   6   0    1.00    0.41 
  -3   6   0   -0.17    0.44 
   3   6   0    1.46    0.30 
   3   6   0    1.30    0.26 
  -3   6   0    1.06    0.42 
   3   6   0    1.30    0.24 
  -3   6   0    0.83    0.42 
   4  -6   0    0.57    0.42 
   4  -6   0    0.50    0.43 
   4  -6   0    0.32    0.34 
   4  -6   0    0.93    0.39 
   4  -6   0    1.33    0.48 
   4  -6   0    1.38    0.43 
  -4  -6   0    1.03    0.49 
   4  -6   0    0.96    0.49 
   4  -6   0    0.90    0.41 
   4  -6   0    1.71    0.54 
   4  -6   0    0.91    0.46 
  -4   6   0    1.83    0.57 
   4   6   0    0.29    0.20 
  -4   6   0    1.12    0.56 
  -4   6   0    1.10    0.52 
   4   6   0    1.05    0.47 
  -4   6   0    1.31    0.48 
   4   6   0    0.37    0.19 
   4   6   0    0.39    0.16 
  -4   6   0    0.74    0.44 
  -4   6   0    1.74    0.58 
  -4   6   0    0.61    0.53 
   4   6   0    0.60    0.20 
   4   6   0    0.49    0.19 
   5  -6   0    0.31    0.41 
   5  -6   0    1.03    0.52 
   5  -6   0    0.61    0.37 
   5  -6   0    0.49    0.49 
  -5  -6   0   -0.32    0.47 
   5  -6   0    0.42    0.48 
   5  -6   0    0.49    0.47 
   5  -6   0    0.61    0.61 
  -5   6   0    0.98    0.52 
  -5   6   0    1.06    0.68 
   5   6   0    0.25    0.40 
   5   6   0    0.82    0.51 
   5   6   0    0.23    0.16 
   5   6   0    0.14    0.37 
   5   6   0    0.53    0.19 
   6  -6   0    1.36    0.58 
  -6  -6   0    1.55    0.63 
   6  -6   0    0.39    0.54 
   6  -6   0    1.07    0.60 
   6  -6   0    1.98    0.83 
   6  -6   0    1.81    0.73 
  -6   6   0    1.94    0.97 
   6   6   0    1.04    0.53 
   6   6   0    1.78    0.71 
   6   6   0    1.52    0.62 
  -6   6   0    2.15    0.81 
  -7  -6   0    2.35    0.96 
   7  -6   0    1.79    0.76 
   7  -6   0    1.95    0.74 
   7  -6   0    0.57    0.62 
   7  -6   0    1.66    0.80 
   7   6   0    1.34    0.65 
   7   6   0    1.50    0.73 
  -7   6   0    1.22    1.00 
   7   6   0    1.64    0.82 
   8  -6   0    0.62    0.65 
   8  -6   0    0.58    0.86 
   8  -6   0    0.39    0.72 
   8  -6   0    0.59    0.66 
   8   6   0    1.02    0.74 
   8   6   0    0.76    0.68 
   8   6   0    1.26    0.73 
  -8   6   0    0.97    1.15 
   9  -6   0   -0.50    0.43 
   9  -6   0   -0.67    0.86 
   9  -6   0   -0.11    0.61 
   9  -6   0    0.43    0.65 
   9  -6   0    0.65    0.88 
  -9   6   0    0.03    1.15 
   9   6   0   -0.62    0.40 
   0  -7   0    0.02    0.30 
   0  -7   0    0.05    0.25 
   0  -7   0   -0.14    0.27 
   0  -7   0   -0.14    0.21 
   0  -7   0   -0.08    0.22 
   0  -7   0   -0.20    0.19 
   0  -7   0   -0.14    0.26 
   0   7   0   -0.30    0.28 
   0   7   0   -0.41    0.28 
   0   7   0   -0.22    0.29 
   0   7   0   -0.12    0.21 
   0   7   0   -0.12    0.26 
   0   7   0   -0.13    0.19 
   0   7   0    0.04    0.31 
   0   7   0   -0.15    0.15 
   0   7   0    0.18    0.26 
   0   7   0   -0.30    0.26 
   0   7   0    0.10    0.21 
   0   7   0    0.07    0.22 
   0   7   0   -0.16    0.25 
   1  -7   0   23.21    1.39 
   1  -7   0   21.32    1.40 
  -1  -7   0   20.11    1.45 
  -1  -7   0   20.37    1.31 
   1  -7   0   25.73    1.38 
   1  -7   0   21.86    1.43 
   1  -7   0   20.41    1.40 
  -1  -7   0   23.34    1.07 
  -1  -7   0   20.28    1.24 
  -1  -7   0   21.31    1.32 
  -1  -7   0   20.47    1.30 
   1  -7   0   22.80    1.45 
  -1  -7   0   22.22    1.31 
   1  -7   0   21.75    1.41 
  -1  -7   0   22.26    1.23 
  -1  -7   0   23.00    1.15 
   1   7   0   22.56    1.33 
   1   7   0   20.18    1.30 
   1   7   0   22.20    1.28 
  -1   7   0   21.75    1.44 
  -1   7   0   19.95    1.49 
  -1   7   0   22.47    1.39 
  -1   7   0   24.45    1.38 
   1   7   0   21.30    1.28 
   1   7   0   22.03    1.31 
   1   7   0   20.90    1.30 
   1   7   0   23.51    1.33 
  -1   7   0   24.33    1.44 
  -1   7   0   24.33    1.37 
  -1   7   0   22.74    1.44 
  -1   7   0   20.40    1.41 
   1   7   0   21.89    1.49 
   1   7   0   23.40    1.29 
   1   7   0   24.09    1.41 
   1   7   0   21.59    1.30 
  -2  -7   0  113.09    5.27 
   2  -7   0  121.24    5.50 
  -2  -7   0  111.45    5.56 
   2  -7   0  126.12    5.52 
   2  -7   0  125.43    5.47 
  -2  -7   0  109.15    5.22 
   2  -7   0  115.85    5.48 
   2  -7   0  117.05    5.47 
   2  -7   0  117.66    5.46 
  -2  -7   0  112.24    5.22 
   2  -7   0  113.44    5.44 
  -2  -7   0  116.15    5.25 
  -2   7   0  118.18    5.41 
  -2   7   0  122.11    5.46 
   2   7   0  120.59    5.08 
  -2   7   0  120.64    5.45 
   2   7   0  114.06    5.21 
   2   7   0  112.98    5.22 
   2   7   0  120.46    5.07 
  -2   7   0  119.48    5.47 
  -2   7   0  122.93    5.50 
   2   7   0  115.20    5.29 
   2   7   0  126.30    5.39 
  -2   7   0  118.13    5.46 
  -2   7   0  118.26    5.59 
   2   7   0  117.97    5.21 
   2   7   0  126.31    5.26 
   2   7   0  119.79    5.23 
   2   7   0  125.03    5.23 
   3  -7   0    7.30    0.82 
   3  -7   0   10.55    1.03 
   3  -7   0    7.97    0.83 
   3  -7   0    8.56    0.82 
   3  -7   0    8.28    0.96 
   3  -7   0    9.47    0.96 
  -3  -7   0    8.65    0.79 
  -3  -7   0    7.86    1.03 
  -3  -7   0   10.21    0.81 
   3  -7   0    6.29    0.88 
   3  -7   0    8.28    0.86 
   3  -7   0    8.95    0.94 
   3   7   0    7.46    0.64 
  -3   7   0    6.63    0.91 
  -3   7   0    8.02    0.95 
  -3   7   0    9.17    0.91 
  -3   7   0    9.01    0.88 
   3   7   0    8.80    0.71 
  -3   7   0    9.74    0.90 
   3   7   0    9.13    0.63 
  -3   7   0    8.46    0.95 
   3   7   0    9.24    0.65 
   3   7   0    9.23    0.68 
   3   7   0    9.83    0.88 
   3   7   0    8.04    0.65 
  -3   7   0    7.66    0.85 
   3   7   0    9.06    0.69 
   4  -7   0    1.59    0.49 
   4  -7   0    2.42    0.64 
   4  -7   0    1.64    0.51 
   4  -7   0    1.90    0.55 
   4  -7   0    0.92    0.45 
  -4  -7   0    1.64    0.51 
   4  -7   0    1.52    0.51 
   4  -7   0    1.66    0.66 
   4  -7   0    1.47    0.49 
   4  -7   0    1.86    0.59 
   4  -7   0    1.16    0.63 
  -4  -7   0   -0.15    0.52 
  -4   7   0    1.40    0.57 
   4   7   0    1.21    0.31 
  -4   7   0    1.21    0.51 
   4   7   0    1.25    0.33 
  -4   7   0    1.15    0.62 
  -4   7   0    2.15    0.66 
  -4   7   0    2.21    0.59 
   4   7   0    1.95    0.56 
   4   7   0    0.70    0.16 
  -4   7   0    1.84    0.64 
   4   7   0    1.33    0.33 
   4   7   0    0.99    0.16 
   4   7   0    0.52    0.24 
   4   7   0    1.05    0.30 
  -4   7   0    1.79    0.52 
   5  -7   0   57.03    2.88 
   5  -7   0   60.75    3.35 
   5  -7   0   58.75    3.36 
   5  -7   0   56.30    2.98 
   5  -7   0   59.11    3.11 
   5  -7   0   59.16    3.11 
   5  -7   0   54.67    3.05 
  -5  -7   0   55.29    3.26 
  -5   7   0   57.23    3.32 
  -5   7   0   57.52    3.04 
   5   7   0   49.55    2.99 
   5   7   0   53.16    2.33 
   5   7   0   54.37    2.45 
   5   7   0   52.92    2.48 
   5   7   0   51.95    2.32 
   6  -7   0    3.74    0.93 
  -6  -7   0    1.95    0.89 
   6  -7   0    2.70    0.79 
   6  -7   0    3.65    1.03 
   6  -7   0    2.55    0.83 
   6   7   0    1.52    0.74 
  -6   7   0    1.91    0.78 
   6   7   0    1.62    0.64 
  -6   7   0    3.17    0.86 
  -7  -7   0   11.90    1.52 
   7  -7   0   11.16    1.32 
   7  -7   0   14.97    1.47 
   7  -7   0   12.88    1.68 
   7  -7   0   10.12    1.39 
   7   7   0    9.52    1.23 
   7   7   0    9.70    1.24 
   7   7   0   14.30    1.47 
  -7   7   0   12.81    1.56 
   8  -7   0    3.97    1.26 
   8  -7   0    2.90    0.90 
   8  -7   0    3.00    0.94 
   8  -7   0    3.50    1.07 
   8   7   0    3.30    1.16 
  -8   7   0    4.22    1.30 
   9  -7   0    4.97    0.89 
   9  -7   0    6.12    1.35 
   9  -7   0    8.22    1.31 
   9  -7   0    6.78    1.22 
   9  -7   0    4.29    1.28 
  -9   7   0    7.68    1.70 
   9   7   0    6.15    1.55 
   0  -8   0    3.59    0.67 
   0  -8   0    2.12    0.55 
   0  -8   0    3.41    0.48 
   0  -8   0    2.56    0.57 
   0  -8   0    2.62    0.48 
   0  -8   0    2.98    0.63 
   0  -8   0    3.09    0.47 
   0   8   0    2.11    0.50 
   0   8   0    1.60    0.32 
   0   8   0    3.71    0.65 
   0   8   0    2.58    0.44 
   0   8   0    2.63    0.58 
   0   8   0    3.23    0.43 
   0   8   0    2.70    0.65 
   0   8   0    2.70    0.58 
   0   8   0    2.59    0.60 
   0   8   0    3.13    0.52 
   0   8   0    2.40    0.50 
   0   8   0    3.10    0.63 
   0   8   0    2.44    0.56 
  -1  -8   0   15.40    1.28 
   1  -8   0   15.78    1.16 
  -1  -8   0   16.58    1.29 
   1  -8   0   16.94    1.27 
  -1  -8   0   15.71    1.15 
   1  -8   0   16.86    1.16 
   1  -8   0   16.52    1.25 
   1  -8   0   17.87    1.28 
  -1  -8   0   14.35    1.10 
  -1  -8   0   15.28    1.01 
   1  -8   0   16.86    1.28 
  -1  -8   0   16.85    1.08 
  -1  -8   0   18.29    0.86 
  -1  -8   0   16.16    1.16 
   1  -8   0   17.78    1.28 
  -1  -8   0   15.94    1.15 
   1   8   0   15.87    1.27 
  -1   8   0   16.09    1.27 
   1   8   0   16.18    1.09 
  -1   8   0   16.71    1.24 
   1   8   0   16.30    1.14 
  -1   8   0   18.66    1.24 
  -1   8   0   18.68    1.18 
   1   8   0   16.94    1.10 
   1   8   0   15.11    1.12 
   1   8   0   15.17    1.13 
  -1   8   0   17.39    1.16 
   1   8   0   19.44    1.21 
  -1   8   0   19.12    1.35 
  -1   8   0   19.14    1.41 
   1   8   0   15.89    1.13 
   1   8   0   16.95    1.14 
  -1   8   0   16.35    1.25 
   1   8   0   16.50    1.15 
   1   8   0   15.64    1.21 
   2  -8   0    2.18    0.59 
  -2  -8   0    1.87    0.19 
  -2  -8   0    2.24    0.41 
   2  -8   0    2.00    0.56 
   2  -8   0    2.60    0.58 
   2  -8   0    2.40    0.51 
  -2  -8   0    2.43    0.44 
  -2  -8   0    2.03    0.72 
  -2  -8   0    2.34    0.49 
  -2  -8   0    2.47    0.72 
  -2  -8   0    2.43    0.50 
   2  -8   0    1.48    0.55 
   2  -8   0    2.25    0.60 
   2  -8   0    2.11    0.48 
  -2  -8   0    1.59    0.19 
   2   8   0    1.22    0.44 
  -2   8   0    2.60    0.68 
   2   8   0    2.67    0.50 
  -2   8   0    1.62    0.61 
   2   8   0    2.30    0.65 
  -2   8   0    2.50    0.58 
   2   8   0    2.08    0.46 
  -2   8   0    2.98    0.67 
   2   8   0    2.72    0.48 
   2   8   0    1.64    0.44 
   2   8   0    1.65    0.40 
  -2   8   0    2.61    0.53 
  -2   8   0    1.53    0.48 
   2   8   0    1.94    0.36 
  -2   8   0    2.72    0.55 
  -2   8   0    2.04    0.50 
   2   8   0    2.21    0.48 
   2   8   0    2.07    0.47 
   2   8   0    2.23    0.36 
  -3  -8   0   66.85    3.25 
   3  -8   0   65.99    3.46 
   3  -8   0   74.19    3.44 
   3  -8   0   67.65    3.46 
  -3  -8   0   53.87    3.47 
   3  -8   0   65.54    3.50 
  -3  -8   0   69.92    3.31 
   3  -8   0   68.90    3.56 
   3  -8   0   68.96    3.55 
   3  -8   0   70.91    3.52 
   3   8   0   66.56    3.36 
  -3   8   0   66.76    3.48 
   3   8   0   65.19    3.11 
   3   8   0   64.02    3.08 
  -3   8   0   68.40    3.50 
  -3   8   0   65.83    3.46 
   3   8   0   58.23    3.13 
   3   8   0   69.75    3.15 
   3   8   0   70.23    3.09 
  -3   8   0   67.91    3.53 
  -3   8   0   67.13    3.48 
   3   8   0   67.77    3.13 
  -3   8   0   65.30    3.42 
  -3   8   0   68.30    3.62 
  -4  -8   0   49.81    2.73 
   4  -8   0   50.91    2.87 
  -4  -8   0   46.89    2.99 
   4  -8   0   48.86    2.98 
   4  -8   0   54.23    2.96 
  -4  -8   0   52.20    2.74 
   4  -8   0   52.67    3.02 
   4  -8   0   53.73    2.98 
   4  -8   0   49.50    2.90 
   4  -8   0   48.70    2.73 
   4   8   0   53.43    2.46 
  -4   8   0   50.49    2.96 
   4   8   0   54.53    2.87 
   4   8   0   49.98    2.33 
  -4   8   0   53.73    2.94 
  -4   8   0   50.97    2.91 
  -4   8   0   50.35    3.06 
  -4   8   0   50.24    2.90 
   4   8   0   52.75    2.43 
   4   8   0   50.84    2.46 
   4   8   0   51.95    2.31 
   4   8   0   49.74    2.47 
  -4   8   0   50.52    2.86 
  -4   8   0   53.61    2.92 
   4   8   0   54.45    2.46 
   5  -8   0    1.80    0.62 
  -5  -8   0    3.61    0.70 
   5  -8   0    2.36    0.78 
   5  -8   0    2.21    0.87 
   5  -8   0    2.41    0.69 
   5  -8   0    3.23    0.77 
   5  -8   0    1.90    0.58 
   5  -8   0    3.37    0.86 
  -5  -8   0    2.89    0.66 
  -5  -8   0    1.93    0.83 
  -5   8   0    2.89    0.83 
   5   8   0    2.32    0.40 
   5   8   0    1.37    0.53 
   5   8   0    1.66    0.31 
   5   8   0    2.81    0.31 
   5   8   0    2.40    0.37 
  -5   8   0    2.66    0.92 
   6  -8   0   23.93    1.87 
   6  -8   0   23.60    2.08 
   6  -8   0   21.17    1.77 
   6  -8   0   21.79    2.01 
  -6  -8   0   20.30    1.94 
  -6   8   0   20.78    1.76 
   6   8   0   17.99    1.69 
  -6   8   0   18.78    1.93 
   6   8   0   21.98    1.02 
   6   8   0   21.30    1.00 
   7  -8   0    2.58    0.86 
  -7  -8   0    1.18    0.83 
   7  -8   0    1.67    0.79 
   7  -8   0    2.26    0.93 
   7  -8   0    3.05    1.15 
  -7   8   0    2.06    0.91 
   7   8   0    0.64    0.74 
   8  -8   0   22.36    2.24 
   8  -8   0   19.65    2.22 
   8  -8   0   22.73    2.04 
   8  -8   0   22.25    1.94 
   8   8   0   19.27    2.02 
  -8   8   0   21.19    2.34 
   0  -9   0   -0.30    0.26 
   0  -9   0    0.31    0.30 
   0  -9   0    0.15    0.31 
   0  -9   0    0.06    0.32 
   0  -9   0   -0.01    0.37 
   0  -9   0   -0.59    0.16 
   0  -9   0    0.19    0.28 
   0   9   0   -0.34    0.27 
   0   9   0    0.19    0.40 
   0   9   0   -0.12    0.24 
   0   9   0    0.10    0.23 
   0   9   0    0.11    0.31 
   0   9   0   -0.07    0.32 
   0   9   0   -0.46    0.39 
   0   9   0   -0.45    0.24 
   0   9   0   -0.03    0.23 
   0   9   0   -0.16    0.38 
   0   9   0   -0.03    0.40 
   0   9   0   -0.22    0.22 
   0   9   0   -0.41    0.14 
   0   9   0    0.31    0.33 
   1  -9   0   48.62    2.84 
  -1  -9   0   53.98    2.77 
  -1  -9   0   59.13    2.61 
  -1  -9   0   50.28    2.73 
   1  -9   0   54.93    2.89 
   1  -9   0   59.31    2.82 
  -1  -9   0   52.05    2.61 
   1  -9   0   54.37    2.86 
   1  -9   0   57.93    2.98 
   1  -9   0   52.65    2.72 
  -1  -9   0   53.47    2.72 
  -1  -9   0   46.43    2.89 
   1  -9   0   52.85    2.85 
  -1  -9   0   52.23    2.75 
   1   9   0   51.87    2.81 
  -1   9   0   49.00    2.79 
  -1   9   0   51.39    2.90 
  -1   9   0   50.83    2.68 
  -1   9   0   53.67    2.82 
   1   9   0   51.90    2.69 
   1   9   0   55.98    2.74 
  -1   9   0   53.30    2.95 
   1   9   0   55.56    2.74 
   1   9   0   50.18    2.63 
  -1   9   0   50.99    2.85 
  -1   9   0   52.34    2.71 
  -1   9   0   54.94    2.87 
   1   9   0   54.15    2.74 
   1   9   0   54.94    2.68 
   1   9   0   53.00    2.72 
   1   9   0   48.77    2.68 
  -1   9   0   50.73    2.55 
   1   9   0   51.37    2.92 
   1   9   0   52.01    2.74 
   2  -9   0  256.97   11.43 
   2  -9   0  270.76   11.43 
  -2  -9   0  251.27   10.82 
   2  -9   0  267.96   11.43 
  -2  -9   0  245.70   10.82 
  -2  -9   0  256.04   11.56 
   2  -9   0  277.30   11.44 
   2  -9   0  253.86   11.40 
   2  -9   0  253.28   11.32 
  -2  -9   0  259.19   11.05 
   2  -9   0  257.18   11.35 
  -2  -9   0  265.70   10.86 
  -2  -9   0  275.68   11.13 
  -2  -9   0  256.41   11.13 
   2   9   0  252.48   11.11 
   2   9   0  277.49   11.27 
   2   9   0  267.29   11.14 
   2   9   0  257.59   11.11 
  -2   9   0  266.01   11.32 
  -2   9   0  255.01   11.36 
   2   9   0  268.80   11.16 
  -2   9   0  245.34   11.37 
   2   9   0  234.85   11.10 
  -2   9   0  245.47   11.41 
   2   9   0  268.66   10.98 
  -2   9   0  246.93   11.26 
  -2   9   0  262.75   11.37 
   2   9   0  253.47   11.23 
  -2   9   0  266.02   11.57 
   2   9   0  261.58   11.12 
   2   9   0  259.02   11.54 
   2   9   0  265.25   10.98 
  -2   9   0  252.23   11.37 
   3  -9   0   39.41    2.38 
  -3  -9   0   37.42    2.09 
   3  -9   0   39.31    2.28 
   3  -9   0   39.24    2.31 
   3  -9   0   41.25    2.40 
  -3  -9   0   37.88    2.45 
   3  -9   0   39.87    2.40 
   3  -9   0   35.00    2.29 
   3  -9   0   37.39    2.33 
  -3  -9   0   36.41    2.05 
   3   9   0   35.79    1.99 
   3   9   0   36.77    1.98 
  -3   9   0   36.62    2.30 
   3   9   0   39.21    1.96 
   3   9   0   38.32    2.07 
  -3   9   0   34.06    2.25 
   3   9   0   37.55    2.18 
   3   9   0   37.53    1.97 
  -3   9   0   39.43    2.32 
  -3   9   0   37.81    2.38 
   3   9   0   37.01    1.99 
   3   9   0   37.42    1.99 
  -3   9   0   40.21    2.57 
  -3   9   0   35.63    2.24 
  -3   9   0   36.86    2.32 
   4  -9   0   43.78    2.59 
   4  -9   0   42.48    2.62 
   4  -9   0   35.86    2.50 
   4  -9   0   40.35    2.39 
  -4  -9   0   41.52    2.31 
  -4  -9   0   42.79    2.70 
  -4  -9   0   38.33    2.31 
   4  -9   0   43.54    2.55 
   4  -9   0   37.44    2.54 
   4  -9   0   44.61    2.57 
  -4   9   0   40.25    2.48 
   4   9   0   39.68    2.06 
   4   9   0   42.15    2.08 
   4   9   0   42.19    2.07 
  -4   9   0   38.64    2.63 
   4   9   0   42.53    1.97 
  -4   9   0   40.42    2.58 
   4   9   0   39.13    2.10 
  -4   9   0   39.45    2.50 
  -4   9   0   41.10    2.52 
  -4   9   0   44.84    2.61 
  -4   9   0   36.38    2.54 
   4   9   0   39.82    1.98 
   4   9   0   42.17    2.10 
   4   9   0   39.15    2.39 
   5  -9   0  157.58    7.67 
   5  -9   0  151.16    7.61 
   5  -9   0  168.83    7.44 
   5  -9   0  156.77    7.46 
   5  -9   0  158.55    7.47 
   5  -9   0  162.15    7.53 
  -5  -9   0  154.62    7.26 
   5  -9   0  164.32    7.26 
  -5  -9   0  160.41    7.31 
  -5  -9   0  155.04    7.68 
   5   9   0  158.21    6.78 
   5   9   0  153.22    6.80 
  -5   9   0  158.12    7.43 
   5   9   0  154.92    6.75 
   5   9   0  154.43    7.37 
   5   9   0  158.87    6.72 
   5   9   0  152.06    6.73 
  -5   9   0  158.37    7.63 
   6  -9   0   35.32    2.63 
   6  -9   0   33.97    2.47 
   6  -9   0   34.68    2.68 
   6  -9   0   37.36    2.55 
  -6  -9   0   35.62    2.68 
  -6   9   0   36.37    2.49 
  -6   9   0   36.90    2.66 
   6   9   0   36.08    1.67 
   6   9   0   32.85    2.38 
   6   9   0   35.51    1.71 
   7  -9   0    9.27    1.40 
  -7  -9   0    8.66    1.46 
   7  -9   0    6.20    1.42 
   7  -9   0    6.27    1.24 
   7  -9   0    6.00    1.22 
  -7   9   0    7.03    1.67 
   7   9   0    6.95    1.21 
  -7   9   0    9.33    1.85 
   8  -9   0    2.95    0.98 
   8  -9   0    2.91    1.14 
   8  -9   0    2.35    1.11 
   8  -9   0    2.90    0.97 
  -8   9   0    3.70    1.40 
   8   9   0    1.06    0.82 
   0 -10   0   35.86    2.00 
   0 -10   0   36.21    1.96 
   0 -10   0   33.91    2.14 
   0 -10   0   31.32    2.19 
   0 -10   0   36.55    2.19 
   0 -10   0   37.25    2.16 
   0 -10   0   36.53    2.20 
   0  10   0   35.40    2.03 
   0  10   0   37.07    2.15 
   0  10   0   36.79    1.78 
   0  10   0   38.61    2.30 
   0  10   0   35.61    2.17 
   0  10   0   37.78    2.19 
   0  10   0   36.65    2.28 
   0  10   0   34.72    1.72 
   0  10   0   35.33    2.10 
   0  10   0   35.27    1.79 
   0  10   0   37.83    2.12 
   0  10   0   32.42    2.09 
  -1 -10   0  119.73    5.56 
  -1 -10   0  120.67    5.61 
   1 -10   0  120.07    5.69 
   1 -10   0  125.51    5.77 
   1 -10   0  117.01    5.58 
  -1 -10   0  120.94    5.36 
  -1 -10   0  112.75    5.58 
   1 -10   0  111.56    5.67 
   1 -10   0  115.48    5.78 
  -1 -10   0  121.79    5.44 
  -1 -10   0  121.27    5.88 
   1 -10   0  121.98    5.56 
   1 -10   0  115.85    5.69 
   1  10   0  111.98    5.51 
  -1  10   0  124.85    5.71 
  -1  10   0  121.21    5.56 
   1  10   0  122.29    5.70 
  -1  10   0  118.07    5.49 
   1  10   0  120.93    5.55 
  -1  10   0  115.87    5.63 
   1  10   0  119.89    5.56 
   1  10   0  119.87    5.58 
  -1  10   0  125.63    5.37 
  -1  10   0  129.88    5.76 
   1  10   0  119.91    5.56 
  -1  10   0  119.48    5.83 
  -1  10   0  119.43    5.79 
   1  10   0  117.15    5.82 
   1  10   0  124.08    5.59 
   1  10   0  122.53    5.56 
   1  10   0  125.79    5.52 
   1  10   0  114.89    5.46 
  -1  10   0  124.57    5.71 
  -2 -10   0    1.36    0.40 
  -2 -10   0    1.77    0.23 
  -2 -10   0    2.04    0.37 
   2 -10   0    1.26    0.54 
  -2 -10   0    1.17    0.56 
   2 -10   0    1.60    0.53 
   2 -10   0    1.40    0.51 
   2 -10   0    1.42    0.62 
   2 -10   0    0.99    0.58 
   2 -10   0    1.18    0.59 
  -2 -10   0    1.62    0.42 
  -2 -10   0    2.34    0.58 
   2 -10   0    1.47    0.51 
  -2  10   0    1.43    0.57 
   2  10   0    1.65    0.50 
   2  10   0    1.02    0.51 
   2  10   0    2.55    0.54 
  -2  10   0    1.54    0.70 
   2  10   0    1.23    0.57 
  -2  10   0    1.34    0.57 
   2  10   0    0.78    0.48 
  -2  10   0    1.37    0.56 
   2  10   0    1.76    0.43 
  -2  10   0    1.36    0.47 
  -2  10   0    1.32    0.58 
   2  10   0    0.87    0.43 
  -2  10   0    1.39    0.53 
   2  10   0    1.16    0.47 
   2  10   0    1.92    0.50 
  -2  10   0    1.13    0.61 
   2  10   0    1.77    0.52 
   2  10   0    1.66    0.42 
   3 -10   0   66.02    3.72 
   3 -10   0   68.84    3.72 
   3 -10   0   69.27    3.74 
  -3 -10   0   73.18    3.94 
   3 -10   0   70.51    3.74 
   3 -10   0   65.08    3.69 
  -3 -10   0   71.88    3.45 
  -3 -10   0   73.12    3.41 
   3 -10   0   74.56    3.71 
   3 -10   0   66.41    3.71 
   3  10   0   69.33    3.37 
   3  10   0   68.84    3.33 
   3  10   0   66.98    3.53 
  -3  10   0   66.86    3.90 
   3  10   0   71.12    3.39 
  -3  10   0   65.37    3.70 
   3  10   0   68.76    3.37 
   3  10   0   71.73    3.33 
  -3  10   0   70.14    3.67 
   3  10   0   68.61    3.44 
  -3  10   0   67.57    3.71 
   3  10   0   64.58    3.35 
  -3  10   0   65.62    3.76 
  -3  10   0   71.29    3.70 
  -3  10   0   68.98    3.75 
  -3  10   0   75.52    3.76 
   4 -10   0   61.75    3.62 
   4 -10   0   67.22    3.76 
  -4 -10   0   70.69    3.48 
  -4 -10   0   72.11    3.45 
  -4 -10   0   66.14    3.90 
   4 -10   0   71.15    3.60 
   4 -10   0   68.92    3.82 
   4 -10   0   64.91    3.70 
   4 -10   0   68.39    3.80 
   4 -10   0   67.41    3.69 
  -4  10   0   65.88    3.71 
   4  10   0   64.01    3.17 
   4  10   0   66.41    3.20 
   4  10   0   63.91    3.19 
  -4  10   0   61.98    4.54 
  -4  10   0   68.59    3.70 
   4  10   0   69.00    3.11 
   4  10   0   64.85    3.19 
   4  10   0   66.57    3.26 
  -4  10   0   66.85    3.74 
   4  10   0   64.37    3.11 
   4  10   0   65.53    3.52 
  -4  10   0   64.51    3.64 
   5 -10   0   28.98    2.14 
  -5 -10   0   23.09    2.07 
   5 -10   0   23.85    2.03 
   5 -10   0   25.10    1.89 
   5 -10   0   27.25    1.88 
   5 -10   0   27.27    2.14 
   5 -10   0   25.55    2.09 
   5 -10   0   29.24    2.12 
   5  10   0   22.98    1.41 
  -5  10   0   27.31    2.08 
   5  10   0   26.94    1.48 
   5  10   0   23.50    1.46 
   5  10   0   25.72    1.91 
   5  10   0   25.80    1.46 
   5  10   0   27.68    1.43 
  -5  10   0   25.43    2.05 
   6 -10   0    8.35    1.29 
   6 -10   0    7.38    1.31 
   6 -10   0    7.10    1.28 
  -6 -10   0    6.66    1.20 
   6 -10   0    7.42    1.22 
  -6  10   0    7.84    1.26 
   6  10   0    8.15    1.14 
  -6  10   0   10.16    1.49 
   6  10   0    7.08    0.66 
   6  10   0    8.90    0.64 
   7 -10   0   38.98    2.77 
   7 -10   0   35.76    2.90 
  -7 -10   0   37.94    2.98 
   7 -10   0   38.81    2.79 
   7 -10   0   41.30    3.04 
  -7  10   0   33.43    2.82 
   7  10   0   34.43    2.63 
  -7  10   0   43.51    2.91 
   8 -10   0   42.89    3.32 
   8 -10   0   44.24    3.50 
   8 -10   0   44.38    3.05 
  -8 -10   0   38.96    3.27 
   8 -10   0   44.41    3.09 
  -8  10   0   40.41    3.28 
   8  10   0   41.35    3.03 
   0 -11   0   -0.11    0.30 
   0 -11   0    0.25    0.45 
   0 -11   0    0.35    0.33 
   0 -11   0   -0.03    0.46 
   0 -11   0    0.69    0.51 
   0 -11   0    0.40    0.37 
   0 -11   0   -0.30    0.42 
   0  11   0   -0.16    0.48 
   0  11   0    0.27    0.52 
   0  11   0   -0.01    0.50 
   0  11   0   -0.14    0.45 
   0  11   0    0.00    0.34 
   0  11   0    0.37    0.23 
   0  11   0    0.11    0.41 
   0  11   0    0.18    0.58 
   0  11   0    0.58    0.46 
   0  11   0    0.22    0.39 
   0  11   0    0.22    0.38 
   0  11   0    0.10    0.24 
  -1 -11   0  160.21    7.17 
   1 -11   0  138.56    6.90 
   1 -11   0  139.52    6.84 
   1 -11   0  145.49    6.93 
   1 -11   0  151.90    6.78 
   1 -11   0  141.94    6.91 
   1 -11   0  141.39    6.68 
  -1 -11   0  138.82    6.56 
  -1 -11   0  149.54    6.84 
  -1 -11   0  148.87    6.76 
  -1 -11   0  146.46    6.51 
   1 -11   0  129.60    6.90 
  -1  11   0  146.13    7.05 
  -1  11   0  136.65    6.94 
   1  11   0  157.82    6.80 
   1  11   0  161.05    6.74 
   1  11   0  148.16    6.76 
   1  11   0  152.65    6.69 
   1  11   0  148.58    6.90 
  -1  11   0  138.68    6.83 
  -1  11   0  147.82    6.84 
  -1  11   0  139.79    6.82 
  -1  11   0  143.38    6.48 
   1  11   0  152.94    6.82 
   1  11   0  152.84    6.77 
   1  11   0  147.72    6.75 
  -1  11   0  149.72    6.75 
  -1  11   0  146.60    6.91 
  -1  11   0  146.59    6.64 
   1  11   0  152.25    7.09 
   1  11   0  149.68    6.73 
   1  11   0  158.31    6.83 
  -2 -11   0  350.05   14.54 
   2 -11   0  334.97   14.91 
   2 -11   0  332.57   14.94 
  -2 -11   0  316.82   15.07 
   2 -11   0  344.83   14.96 
   2 -11   0  361.72   14.86 
   2 -11   0  356.26   15.01 
   2 -11   0  339.98   14.98 
   2 -11   0  323.02   14.80 
  -2 -11   0  334.70   14.44 
   2  11   0  347.84   14.68 
   2  11   0  351.08   14.72 
   2  11   0  333.08   14.61 
  -2  11   0  332.97   14.99 
   2  11   0  333.04   14.45 
   2  11   0  337.21   14.45 
  -2  11   0  337.15   14.89 
  -2  11   0  340.52   14.75 
  -2  11   0  351.58   14.97 
  -2  11   0  343.17   15.12 
   2  11   0  320.82   15.03 
  -2  11   0  348.68   14.95 
   2  11   0  354.30   14.67 
  -2  11   0  338.90   14.88 
   2  11   0  345.18   14.67 
   2  11   0  350.78   14.64 
  -2  11   0  346.36   14.79 
   2  11   0  349.55   14.80 
   2  11   0  333.81   14.61 
  -3 -11   0   22.02    1.97 
   3 -11   0   23.28    1.76 
   3 -11   0   22.58    1.77 
  -3 -11   0   22.03    1.45 
   3 -11   0   22.14    1.74 
   3 -11   0   22.64    1.87 
   3 -11   0   19.98    1.74 
   3 -11   0   20.30    1.75 
  -3 -11   0   21.80    1.17 
  -3 -11   0   23.65    1.44 
   3 -11   0   22.78    1.74 
   3  11   0   19.75    1.45 
   3  11   0   21.05    1.53 
   3  11   0   23.62    1.49 
  -3  11   0   24.08    1.76 
  -3  11   0   21.93    1.95 
   3  11   0   23.92    1.47 
  -3  11   0   22.07    1.71 
   3  11   0   20.14    1.55 
   3  11   0   22.69    1.49 
  -3  11   0   21.99    1.82 
  -3  11   0   23.19    1.77 
  -3  11   0   21.54    1.81 
   3  11   0   20.25    1.46 
   3  11   0   19.24    1.38 
  -3  11   0   25.14    1.85 
  -3  11   0   24.31    1.86 
   4 -11   0    6.99    1.13 
   4 -11   0    5.50    0.96 
   4 -11   0    3.72    0.89 
  -4 -11   0    6.41    1.26 
   4 -11   0    4.60    0.90 
   4 -11   0    5.33    0.90 
   4 -11   0    5.67    1.11 
   4 -11   0    4.68    1.02 
   4  11   0    5.73    0.72 
  -4  11   0    4.15    0.95 
   4  11   0    7.09    0.78 
   4  11   0    5.73    0.86 
   4  11   0    5.81    0.72 
  -4  11   0    6.27    1.06 
   4  11   0    6.61    0.77 
   4  11   0    5.80    0.67 
   4  11   0    5.99    0.66 
  -4  11   0    6.28    1.14 
   4  11   0    5.30    0.75 
   5 -11   0  109.88    5.60 
   5 -11   0  100.99    5.59 
   5 -11   0  106.45    5.71 
   5 -11   0  104.32    5.67 
   5 -11   0  119.38    5.45 
   5 -11   0  102.48    5.56 
  -5 -11   0  109.28    5.83 
   5 -11   0  102.22    5.48 
   5  11   0  111.88    5.45 
   5  11   0  106.97    4.61 
  -5  11   0  107.61    5.68 
  -5  11   0  108.49    5.55 
   5  11   0  118.01    5.17 
   5  11   0  111.36    4.93 
   5  11   0  107.68    4.85 
   5  11   0  109.37    4.64 
   5  11   0  102.53    4.90 
   5  11   0  104.57    4.87 
   6 -11   0   56.47    3.58 
   6 -11   0   51.77    3.58 
   6 -11   0   56.86    3.55 
   6 -11   0   57.86    3.70 
  -6 -11   0   58.48    3.73 
   6  11   0   58.12    2.53 
   6  11   0   57.12    2.68 
  -6  11   0   60.05    3.60 
  -6  11   0   58.48    3.72 
   6  11   0   55.95    2.50 
   6  11   0   49.75    3.28 
   6  11   0   54.30    2.70 
   7 -11   0    0.56    1.00 
  -7 -11   0    0.46    0.87 
   7 -11   0   -0.27    0.76 
   7 -11   0    0.42    0.76 
   7 -11   0   -0.27    0.79 
  -7  11   0   -0.12    0.95 
   7  11   0    0.61    0.64 
  -7  11   0    1.48    1.05 
  -8 -11   0   21.05    2.29 
   8 -11   0   17.85    2.28 
   8 -11   0   17.19    1.97 
   8 -11   0   14.65    1.97 
   8 -11   0   19.52    2.10 
  -8  11   0   19.10    2.32 
   8  11   0   21.70    2.01 
   0 -12   0  163.42    7.42 
   0 -12   0  165.68    7.69 
   0 -12   0  161.91    7.85 
   0 -12   0  176.63    7.68 
   0 -12   0  167.93    7.37 
   0 -12   0  169.75    7.70 
   0 -12   0  161.24    7.65 
   0  12   0  159.98    7.57 
   0  12   0  174.12    7.90 
   0  12   0  164.52    7.48 
   0  12   0  140.41    6.86 
   0  12   0  167.28    7.54 
   0  12   0  170.90    7.63 
   0  12   0  173.62    7.68 
   0  12   0  168.37    7.79 
  -1 -12   0   41.94    2.25 
   1 -12   0   42.13    2.60 
   1 -12   0   46.32    2.71 
   1 -12   0   39.89    2.33 
   1 -12   0   43.27    2.58 
  -1 -12   0   40.88    2.15 
   1 -12   0   37.67    2.56 
   1 -12   0   40.02    2.37 
   1 -12   0   43.09    2.57 
  -1 -12   0   38.29    2.68 
   1  12   0   37.78    2.28 
   1  12   0   35.59    2.34 
  -1  12   0   41.31    2.26 
  -1  12   0   39.19    2.59 
   1  12   0   38.31    2.50 
   1  12   0   40.52    2.41 
  -1  12   0   40.64    2.45 
   1  12   0   34.89    2.58 
  -1  12   0   39.32    2.47 
  -1  12   0   39.13    2.66 
  -1  12   0   40.75    2.37 
   1  12   0   38.65    2.34 
   1  12   0   41.56    2.42 
  -1  12   0   38.86    2.55 
  -1  12   0   40.93    2.53 
  -1  12   0   40.23    2.12 
   2 -12   0    2.53    0.75 
  -2 -12   0    3.25    0.58 
  -2 -12   0    2.74    0.84 
   2 -12   0    2.98    0.78 
   2 -12   0    2.57    0.83 
   2 -12   0    3.65    0.88 
   2 -12   0    1.47    0.73 
   2 -12   0    3.43    0.79 
   2 -12   0    2.22    0.69 
  -2 -12   0    3.85    0.56 
  -2  12   0    2.60    0.84 
  -2  12   0    2.61    0.85 
   2  12   0    2.45    0.67 
   2  12   0    3.30    0.58 
   2  12   0    2.66    0.81 
  -2  12   0    2.29    0.89 
   2  12   0    2.53    0.57 
  -2  12   0    1.85    0.70 
   2  12   0    3.40    0.70 
   2  12   0    2.39    0.63 
  -2  12   0    1.87    0.68 
   2  12   0    2.91    0.78 
  -2  12   0    2.79    0.80 
  -2  12   0    3.02    0.68 
   2  12   0    4.03    0.83 
  -2  12   0    2.20    0.71 
   3 -12   0   83.30    4.47 
   3 -12   0   82.50    4.32 
   3 -12   0   76.64    4.29 
   3 -12   0   75.47    4.31 
   3 -12   0   78.66    4.33 
   3 -12   0   81.93    4.36 
   3 -12   0   81.23    4.34 
  -3 -12   0   85.99    4.67 
  -3  12   0   81.20    4.36 
   3  12   0   85.39    3.52 
  -3  12   0   76.59    4.18 
   3  12   0   85.61    4.12 
   3  12   0   82.37    3.50 
   3  12   0   75.94    3.90 
   3  12   0   84.51    4.13 
  -3  12   0   85.33    4.60 
  -3  12   0   76.89    4.21 
   3  12   0   81.46    3.99 
  -3  12   0   74.74    4.33 
  -3  12   0   73.25    4.24 
   3  12   0   81.20    4.00 
  -3  12   0   72.97    4.26 
  -3  12   0   76.36    4.37 
  -4 -12   0   85.02    5.02 
   4 -12   0   94.09    4.91 
   4 -12   0   95.40    4.75 
   4 -12   0   84.60    4.83 
   4 -12   0   83.41    4.75 
   4 -12   0   90.94    4.83 
   4 -12   0   86.34    4.77 
   4 -12   0   96.15    4.98 
  -4  12   0   87.65    4.89 
   4  12   0   92.44    4.59 
   4  12   0   91.82    4.24 
  -4  12   0   90.90    4.77 
   4  12   0   90.48    4.32 
   4  12   0   88.37    4.37 
  -4  12   0   88.54    4.77 
  -4  12   0   93.94    4.88 
   4  12   0   87.10    4.28 
   4  12   0   87.46    4.20 
   5 -12   0    3.00    0.89 
  -5 -12   0    3.05    1.07 
   5 -12   0    2.37    0.87 
   5 -12   0    4.03    1.07 
   5 -12   0    3.32    0.94 
   5 -12   0    3.96    0.87 
   5 -12   0    4.45    1.08 
   5  12   0    2.37    0.58 
  -5  12   0    3.74    0.88 
   5  12   0    2.80    0.61 
   5  12   0    2.66    0.86 
   5  12   0    2.46    0.42 
   5  12   0    2.46    0.62 
   5  12   0    3.23    0.47 
  -5  12   0    3.64    1.17 
   6 -12   0   14.48    1.74 
   6 -12   0   12.78    1.64 
  -6 -12   0   13.85    1.73 
   6 -12   0   12.43    1.62 
   6 -12   0   11.83    1.67 
   6  12   0   13.85    0.92 
   6  12   0   12.77    1.44 
  -6  12   0   12.70    1.72 
   6  12   0   15.03    0.89 
   6  12   0   14.58    0.79 
  -6  12   0   11.07    1.52 
   6  12   0   12.71    1.03 
   7 -12   0   60.98    3.82 
  -7 -12   0   63.07    4.07 
   7 -12   0   60.10    3.75 
   7 -12   0   51.59    3.76 
   7 -12   0   54.86    3.93 
  -7  12   0   48.77    3.67 
   7  12   0   54.07    2.47 
  -7  12   0   58.49    3.79 
   7  12   0   52.91    3.44 
   0 -13   0    0.82    0.46 
   0 -13   0    0.06    0.42 
   0 -13   0    0.69    0.45 
   0 -13   0    1.51    0.68 
   0  13   0    0.23    0.40 
   0  13   0    1.77    0.69 
   0  13   0    2.10    0.74 
   0  13   0   -0.01    0.65 
   0  13   0    0.89    0.67 
   0  13   0    0.36    0.68 
   0  13   0    0.74    0.69 
   1 -13   0   66.22    3.80 
  -1 -13   0   79.96    3.65 
   1 -13   0   76.29    4.12 
   1 -13   0   72.35    3.82 
   1 -13   0   82.83    4.22 
  -1 -13   0   77.97    4.33 
   1 -13   0   78.28    4.27 
  -1 -13   0   75.21    3.71 
   1 -13   0   72.19    4.50 
  -1  13   0   75.96    4.00 
  -1  13   0   71.71    4.18 
   1  13   0   73.16    4.24 
  -1  13   0   67.88    3.65 
   1  13   0   70.74    4.05 
   1  13   0   77.86    3.96 
  -1  13   0   71.58    4.03 
   1  13   0   72.10    3.83 
  -1  13   0   71.98    4.15 
  -1  13   0   74.19    4.07 
   1  13   0   81.39    3.89 
   1  13   0   83.09    4.01 
   1  13   0   75.78    3.99 
  -1  13   0   75.89    4.12 
  -1  13   0   75.54    3.89 
   2 -13   0   72.35    3.76 
   2 -13   0   67.55    3.90 
  -2 -13   0   67.92    3.43 
  -2 -13   0   63.00    4.02 
   2 -13   0   68.15    3.73 
   2 -13   0   73.08    3.98 
   2 -13   0   68.46    3.97 
   2 -13   0   70.40    3.95 
   2 -13   0   61.16    3.80 
  -2  13   0   70.16    4.10 
  -2  13   0   72.23    3.90 
   2  13   0   66.74    3.99 
  -2  13   0   71.00    3.87 
   2  13   0   69.19    3.42 
  -2  13   0   64.60    3.41 
   2  13   0   67.67    3.64 
   2  13   0   67.79    3.77 
  -2  13   0   68.46    3.65 
   2  13   0   70.32    3.62 
  -2  13   0   64.79    3.90 
  -2  13   0   68.48    3.98 
   2  13   0   68.58    3.61 
  -2  13   0   71.36    3.93 
  -2  13   0   73.58    3.75 
   2  13   0   70.09    3.62 
   3 -13   0   35.91    2.55 
   3 -13   0   40.88    2.56 
  -3 -13   0   28.79    2.61 
   3 -13   0   34.60    2.49 
   3 -13   0   34.70    2.45 
   3 -13   0   33.20    2.34 
   3 -13   0   34.08    2.45 
   3 -13   0   35.82    2.62 
   3  13   0   33.12    2.17 
   3  13   0   32.87    2.23 
  -3  13   0   39.90    2.74 
  -3  13   0   32.88    2.54 
  -3  13   0   34.30    2.31 
  -3  13   0   34.03    2.56 
   3  13   0   35.69    1.73 
   3  13   0   36.22    2.28 
   3  13   0   32.78    2.10 
  -3  13   0   35.15    2.39 
   3  13   0   35.35    1.74 
  -3  13   0   34.71    2.53 
  -3  13   0   37.06    2.49 
  -3  13   0   36.88    2.55 
   3  13   0   34.52    2.15 
   4 -13   0   14.16    1.75 
   4 -13   0   15.70    1.55 
  -4 -13   0   17.64    1.99 
   4 -13   0   13.64    1.68 
   4 -13   0   13.05    1.48 
   4 -13   0   13.41    1.62 
   4 -13   0   18.17    1.76 
  -4  13   0   12.65    1.53 
  -4  13   0   15.78    1.60 
   4  13   0   14.39    1.17 
   4  13   0   15.87    1.29 
   4  13   0   17.73    1.42 
  -4  13   0   17.57    1.77 
  -4  13   0   17.00    1.57 
   4  13   0   14.57    1.39 
   4  13   0   15.48    1.29 
   5 -13   0   30.98    2.66 
   5 -13   0   33.71    2.41 
   5 -13   0   33.83    2.63 
   5 -13   0   35.79    2.65 
   5 -13   0   34.33    2.52 
  -5 -13   0   32.47    2.73 
   5 -13   0   34.32    2.70 
  -5  13   0   33.43    2.62 
  -5  13   0   37.23    2.65 
   5  13   0   38.51    1.95 
   5  13   0   37.21    1.88 
   5  13   0   34.40    2.03 
   5  13   0   35.66    2.10 
  -5  13   0   34.12    2.62 
   5  13   0   33.60    2.36 
   5  13   0   31.92    2.04 
   6 -13   0   21.59    2.13 
   6 -13   0   23.79    2.28 
  -6 -13   0   20.76    2.19 
   6 -13   0   19.47    2.05 
   6 -13   0   22.00    2.16 
   6  13   0   22.10    1.44 
   6  13   0   21.54    1.34 
  -6  13   0   20.63    2.14 
   6  13   0   22.37    1.28 
  -6  13   0   24.03    2.26 
   6  13   0   20.74    1.86 
   7 -13   0    0.57    0.98 
   7 -13   0    0.83    0.74 
   7 -13   0    0.65    0.96 
  -7 -13   0    1.51    1.18 
   7 -13   0    0.58    0.75 
  -7  13   0    0.77    1.02 
  -7  13   0    0.81    1.07 
   7  13   0    0.04    0.29 
   0 -14   0   10.20    1.44 
   0 -14   0   11.27    1.14 
   0 -14   0   12.77    1.10 
   0  14   0    9.64    1.41 
   0  14   0    8.78    1.35 
   0  14   0   10.52    1.38 
   0  14   0   10.59    1.21 
   0  14   0   11.74    1.36 
   0  14   0   12.48    1.31 
   0  14   0   10.81    1.13 
  -1 -14   0   19.71    1.89 
   1 -14   0   20.73    1.62 
   1 -14   0   23.83    1.71 
   1 -14   0   21.62    1.89 
   1 -14   0   23.11    1.92 
  -1 -14   0   18.69    1.46 
   1  14   0   18.66    1.57 
   1  14   0   22.30    1.67 
  -1  14   0   20.57    1.71 
   1  14   0   20.42    1.88 
  -1  14   0   19.55    1.86 
  -1  14   0   22.42    1.80 
   1  14   0   20.24    1.76 
   1  14   0   19.92    1.84 
  -1  14   0   23.16    1.85 
  -1  14   0   22.91    1.67 
   1  14   0   20.26    1.72 
   1  14   0   20.59    1.74 
  -1  14   0   23.92    1.94 
  -1  14   0   21.68    1.48 
  -1  14   0   21.87    1.98 
  -2 -14   0    0.26    0.73 
   2 -14   0    0.12    0.50 
   2 -14   0   -0.12    0.57 
   2 -14   0    0.00    0.62 
   2 -14   0    0.18    0.57 
  -2  14   0   -0.11    0.69 
   2  14   0   -0.19    0.39 
  -2  14   0   -0.16    0.63 
  -2  14   0    0.64    0.75 
   2  14   0   -1.00    0.49 
  -2  14   0   -0.11    0.55 
  -2  14   0   -0.49    0.55 
   2  14   0    0.11    0.54 
  -2  14   0    0.44    0.53 
  -2  14   0   -1.18    0.57 
   2  14   0    0.02    0.55 
   2  14   0    0.29    0.47 
  -2  14   0   -0.95    0.62 
   2  14   0   -0.71    0.52 
  -2  14   0   -0.03    0.60 
   2  14   0    0.21    0.54 
   3 -14   0   16.36    1.79 
   3 -14   0   15.74    1.76 
   3 -14   0   14.37    1.57 
   3 -14   0   15.53    1.64 
   3 -14   0   14.84    1.56 
  -3 -14   0   15.78    1.93 
   3 -14   0   17.07    1.75 
  -3  14   0   21.55    1.73 
   3  14   0   19.27    1.62 
   3  14   0   16.19    1.42 
   3  14   0   13.46    1.36 
  -3  14   0   14.92    1.65 
   3  14   0   16.38    1.44 
  -3  14   0   15.53    1.53 
  -3  14   0   17.63    2.00 
  -3  14   0   19.59    1.89 
   3  14   0   16.97    1.46 
   3  14   0   16.14    1.05 
  -3  14   0   14.55    1.72 
  -3  14   0   18.69    1.83 
   4 -14   0   52.05    3.16 
   4 -14   0   51.13    3.30 
   4 -14   0   44.60    3.10 
   4 -14   0   46.98    3.12 
   4 -14   0   46.43    3.20 
  -4 -14   0   48.97    3.52 
   4 -14   0   45.72    3.16 
  -4  14   0   45.06    3.09 
   4  14   0   45.88    2.67 
   4  14   0   46.01    2.58 
  -4  14   0   48.76    3.11 
  -4  14   0   46.42    3.07 
   4  14   0   51.22    2.93 
  -4  14   0   42.34    3.17 
   4  14   0   42.95    2.64 
   4  14   0   48.83    2.80 
   5 -14   0    2.66    1.16 
   5 -14   0    3.93    1.15 
  -5 -14   0    1.26    0.84 
   5 -14   0    2.06    1.03 
   5 -14   0    2.16    1.03 
   5 -14   0    3.80    1.06 
   5 -14   0    2.93    1.02 
  -5  14   0    3.90    1.26 
  -5  14   0    2.77    1.10 
   5  14   0    1.98    0.54 
   5  14   0    1.71    0.61 
  -5  14   0    2.60    1.03 
   5  14   0    1.56    0.64 
   5  14   0    3.08    0.72 
   6 -14   0    3.77    1.13 
   6 -14   0    4.80    1.28 
  -6 -14   0    7.68    1.47 
   6 -14   0    6.68    1.27 
   6 -14   0    3.21    1.16 
   6  14   0    3.50    0.72 
  -6  14   0    4.59    1.13 
  -6  14   0    9.85    1.59 
   6  14   0    4.44    0.67 
  -6  14   0    4.16    1.22 
   6  14   0    5.13    0.74 
  -7 -14   0   15.04    2.12 
   7 -14   0    9.12    1.56 
   7 -14   0   14.07    1.95 
   7 -14   0    8.28    1.55 
  -7  14   0   13.31    2.01 
  -7  14   0    7.55    1.46 
   7  14   0   10.76    0.88 
   0 -15   0    0.25    0.55 
   0 -15   0    0.40    0.58 
   0  15   0    0.18    0.65 
   0  15   0   -0.75    0.41 
   0  15   0   -0.31    0.47 
   0  15   0   -0.46    0.57 
   0  15   0    0.05    0.45 
   0  15   0    0.10    0.55 
   0  15   0   -0.15    0.53 
   1 -15   0    4.90    0.93 
   1 -15   0    4.94    0.93 
  -1 -15   0    4.90    1.08 
   1 -15   0    2.69    1.04 
   1  15   0    6.02    1.22 
   1  15   0    4.91    1.06 
   1  15   0    7.33    1.06 
  -1  15   0    4.24    1.15 
  -1  15   0    3.80    1.00 
  -1  15   0    4.56    0.96 
   1  15   0    5.11    0.87 
  -1  15   0    6.09    0.94 
   1  15   0    4.75    1.09 
  -1  15   0    5.93    0.79 
  -1  15   0    5.06    0.95 
   1  15   0    7.51    1.21 
   1  15   0    4.03    1.09 
  -1  15   0    3.56    1.11 
  -1  15   0    5.89    1.35 
   2 -15   0   15.02    1.72 
   2 -15   0   14.87    1.46 
  -2 -15   0   13.93    1.82 
   2 -15   0   17.54    1.61 
   2 -15   0   16.30    1.67 
  -2  15   0   16.08    1.67 
  -2  15   0   14.10    1.43 
  -2  15   0   17.11    1.52 
   2  15   0   13.93    1.64 
  -2  15   0   16.98    1.92 
  -2  15   0   15.75    1.72 
   2  15   0   12.56    1.21 
  -2  15   0   15.14    1.76 
  -2  15   0   14.25    1.74 
   2  15   0   11.63    1.30 
   2  15   0   13.43    1.42 
   2  15   0   16.64    1.55 
   2  15   0   17.21    1.55 
   2  15   0   15.50    1.61 
  -2  15   0   15.52    1.64 
   3 -15   0    3.76    1.00 
   3 -15   0    2.98    0.94 
   3 -15   0    3.19    1.00 
   3 -15   0    4.68    0.90 
  -3 -15   0    2.39    1.03 
   3  15   0    3.73    1.06 
  -3  15   0    2.36    1.17 
   3  15   0    2.78    0.87 
   3  15   0    2.22    0.50 
   3  15   0    2.76    0.81 
   3  15   0    2.85    0.87 
   3  15   0    3.85    0.93 
  -3  15   0    4.82    1.32 
  -3  15   0    4.71    1.16 
  -3  15   0    3.05    1.03 
  -3  15   0    5.23    1.01 
  -3  15   0    4.60    1.15 
   4 -15   0    2.13    1.04 
   4 -15   0    1.40    0.70 
   4 -15   0    1.51    1.05 
  -4 -15   0    0.34    0.98 
   4 -15   0    1.77    0.92 
   4 -15   0    1.32    0.83 
   4  15   0    1.01    0.65 
  -4  15   0    0.78    0.76 
  -4  15   0    1.03    0.81 
   4  15   0    0.63    0.61 
   4  15   0    0.74    0.67 
  -4  15   0    4.08    1.23 
   4  15   0    2.10    0.66 
   5 -15   0    1.25    0.82 
   5 -15   0    1.66    1.02 
   5 -15   0    0.40    0.78 
  -5 -15   0    1.45    0.96 
   5 -15   0    0.87    1.04 
   5 -15   0    0.49    0.77 
   5  15   0    0.86    0.56 
   5  15   0    0.94    0.62 
  -5  15   0    1.26    0.70 
   5  15   0    2.05    0.56 
  -5  15   0    3.14    1.21 
   5  15   0    1.86    0.66 
  -5  15   0    1.09    0.99 
   6 -15   0    0.52    0.99 
  -6 -15   0    1.76    1.07 
   6 -15   0    1.91    1.08 
   6 -15   0    1.44    0.92 
   6 -15   0    1.21    1.07 
  -6  15   0    2.45    1.17 
   6  15   0    0.49    0.48 
   6  15   0    0.60    0.45 
  -6  15   0    2.50    1.17 
   6  15   0    0.72    0.45 
   0 -16   0    5.53    1.13 
   0  16   0    4.68    0.85 
   0  16   0    5.36    1.27 
   0  16   0    4.72    1.14 
   0  16   0    4.69    1.27 
   0  16   0    3.13    1.10 
   0  16   0    4.24    1.15 
   0  16   0    5.04    1.08 
  -1 -16   0    4.78    1.21 
   1 -16   0    3.97    0.90 
   1 -16   0    5.40    1.10 
   1  16   0    4.34    1.04 
  -1  16   0    6.64    0.89 
   1  16   0    5.55    1.15 
   1  16   0    5.03    1.23 
   1  16   0    3.62    1.15 
  -1  16   0    5.43    1.31 
   1  16   0    4.31    1.21 
  -1  16   0    5.10    1.24 
   1  16   0    4.44    0.92 
  -1  16   0    5.13    1.31 
  -1  16   0    4.19    1.04 
  -1  16   0    4.12    0.88 
  -1  16   0    4.72    1.38 
   1  16   0    5.58    1.02 
  -1  16   0    3.76    1.09 
   2 -16   0    1.84    0.79 
   2 -16   0    2.86    0.91 
  -2 -16   0    1.14    0.81 
   2 -16   0    1.70    0.78 
   2  16   0    1.18    0.83 
  -2  16   0    2.27    1.03 
   2  16   0    1.83    0.82 
  -2  16   0    1.36    0.98 
  -2  16   0    2.31    0.96 
   2  16   0    0.90    0.72 
  -2  16   0    2.59    0.95 
   2  16   0    2.01    0.68 
   2  16   0    1.75    1.05 
  -2  16   0    2.44    1.10 
  -2  16   0    2.89    1.21 
   2  16   0    1.37    0.85 
  -2  16   0    2.96    0.84 
   3 -16   0    0.87    0.92 
   3 -16   0    0.95    0.79 
  -3 -16   0    0.73    0.81 
   3 -16   0    0.96    0.82 
   3 -16   0    0.50    0.79 
  -3  16   0    0.00    0.91 
   3  16   0    0.96    0.78 
   3  16   0    0.09    0.36 
  -3  16   0    0.50    0.74 
   3  16   0    0.48    0.68 
  -3  16   0    0.52    0.54 
   3  16   0   -0.52    0.65 
  -3  16   0    0.18    0.80 
   3  16   0    0.09    0.69 
   4 -16   0   -0.71    0.69 
   4 -16   0   -0.28    0.65 
   4 -16   0   -0.44    0.56 
  -4 -16   0    0.16    1.05 
   4 -16   0   -1.14    0.50 
   4  16   0   -0.24    0.61 
   4  16   0   -1.23    0.50 
  -4  16   0   -0.16    0.38 
  -4  16   0    0.44    0.95 
  -4  16   0   -0.47    0.50 
   4  16   0   -0.72    0.57 
   4  16   0    0.53    0.54 
  -4  16   0   -1.71    0.70 
   5 -16   0    0.05    0.92 
  -5 -16   0   -0.47    0.82 
   5 -16   0    0.34    0.92 
   5 -16   0    0.34    0.64 
  -5  16   0    1.83    1.10 
   5  16   0    0.13    0.55 
   5  16   0   -0.78    0.38 
  -5  16   0    0.23    0.73 
   5  16   0    0.11    0.51 
   5  16   0    0.03    0.53 
  -5  16   0   -0.78    0.69 
   0 -17   0   -0.08    0.87 
   0  17   0   -0.16    0.89 
   0  17   0   -0.47    0.51 
   0  17   0    0.47    0.85 
   0  17   0   -1.01    0.79 
   0  17   0    0.78    0.77 
   0  17   0    1.26    0.97 
  -1 -17   0   -0.13    0.79 
   1 -17   0    1.09    0.89 
   1  17   0    0.27    0.84 
  -1  17   0    1.59    0.98 
   1  17   0    0.76    0.73 
   1  17   0    0.99    0.87 
  -1  17   0   -0.16    0.73 
   1  17   0    0.17    0.82 
  -1  17   0   -0.53    0.50 
  -1  17   0    2.12    1.02 
  -1  17   0   -0.13    0.83 
   1  17   0    1.04    0.87 
   1  17   0   -1.18    0.67 
   2 -17   0   -0.43    0.70 
  -2 -17   0    0.74    0.80 
   2 -17   0    0.18    0.60 
  -2  17   0   -1.53    0.79 
   2  17   0    0.05    0.83 
   2  17   0   -0.59    0.65 
  -2  17   0    1.15    0.97 
   2  17   0    0.30    0.75 
  -2  17   0    0.73    0.96 
   2  17   0    0.00    0.55 
  -2  17   0    0.57    0.69 
   2  17   0   -0.16    0.64 
  -2  17   0    0.50    0.64 
   2  17   0    0.27    0.69 
  -2  17   0   -0.67    0.86 
  -2  17   0    0.45    0.76 
  -2  17   0    0.51    1.00 
   3 -17   0    3.25    1.01 
   3 -17   0    2.53    1.07 
   3 -17   0    2.71    1.07 
  -3 -17   0    4.13    1.34 
   3 -17   0    4.98    1.20 
   3  17   0    3.08    0.93 
   3  17   0    2.57    0.94 
  -3  17   0    4.06    1.32 
   3  17   0    3.30    0.59 
  -3  17   0    3.83    1.27 
  -3  17   0    2.26    0.98 
   3  17   0    2.41    0.92 
   3  17   0    3.80    1.01 
  -4 -17   0   -0.38    0.67 
   4 -17   0    1.75    0.98 
   4 -17   0    0.49    0.54 
   4 -17   0   -0.95    0.85 
   4 -17   0    0.01    0.56 
   4  17   0    0.48    0.74 
   4  17   0   -0.25    0.59 
  -4  17   0    1.50    1.03 
   4  17   0   -0.21    0.69 
   4  17   0    0.16    0.55 
  -4  17   0   -0.27    0.76 
  -4  17   0    0.45    0.75 
   5 -17   0   -0.52    0.82 
   5 -17   0    0.25    0.70 
  -5 -17   0   -0.27    0.82 
   5  17   0    1.17    0.66 
  -5  17   0    1.31    1.02 
   5  17   0    1.19    0.68 
  -5  17   0    0.87    0.85 
  -5  17   0    0.09    0.93 
   5  17   0    2.02    0.66 
   5  17   0    1.06    0.63 
   0 -18   0    5.12    1.25 
   0  18   0    6.23    1.38 
   0  18   0    5.77    1.22 
   0  18   0    7.51    1.46 
   0  18   0    6.24    1.26 
   0  18   0    6.54    1.42 
   0  18   0    8.04    1.56 
  -1 -18   0    4.46    1.43 
   1 -18   0    2.65    1.18 
   1  18   0    5.73    1.39 
   1  18   0    2.65    0.96 
  -1  18   0    3.21    1.09 
  -1  18   0    2.87    1.04 
  -1  18   0    3.97    1.33 
   1  18   0    4.68    1.19 
   1  18   0    4.34    1.22 
   1  18   0    3.81    1.17 
  -1  18   0    2.74    0.99 
  -1  18   0    3.64    1.06 
   1  18   0    3.65    1.20 
  -1  18   0    2.71    1.07 
  -2 -18   0    4.07    1.26 
   2 -18   0    3.60    1.28 
  -2  18   0   10.65    1.71 
   2  18   0    7.73    1.34 
  -2  18   0    7.17    1.52 
   2  18   0    5.14    1.18 
  -2  18   0    9.50    1.11 
  -2  18   0    5.11    1.36 
   2  18   0    4.76    1.26 
  -2  18   0    3.51    1.38 
   2  18   0    4.38    1.29 
   3 -18   0   14.21    1.70 
   3 -18   0   14.43    1.92 
  -3 -18   0   11.13    1.82 
   3  18   0   12.36    0.99 
   3  18   0    9.89    1.41 
   3  18   0   15.27    1.62 
   3  18   0   13.36    1.61 
  -3  18   0   13.11    1.56 
   3  18   0   10.47    1.47 
  -3  18   0   11.92    1.82 
  -3  18   0   11.28    1.83 
   4 -18   0    9.52    1.55 
   4 -18   0    6.89    1.49 
   4 -18   0   10.71    1.54 
  -4 -18   0    5.69    1.57 
   4 -18   0    9.75    1.59 
   4  18   0    8.86    1.35 
   4  18   0    8.56    1.14 
   4  18   0    6.60    1.13 
  -4  18   0    8.98    1.73 
  -4  18   0    8.90    2.06 
  -4  18   0    7.36    1.47 
   4  18   0    7.68    1.21 
   0 -19   0    0.26    0.72 
   0  19   0    0.59    1.08 
   0  19   0    0.58    0.96 
   0  19   0   -0.35    0.57 
  -1 -19   0    7.76    1.53 
   1 -19   0    6.66    1.42 
  -1  19   0   14.83    1.94 
   1  19   0    9.69    1.76 
  -1  19   0   13.08    1.86 
   1  19   0    6.79    1.53 
   1  19   0   11.19    1.45 
   1  19   0    9.98    1.62 
  -1  19   0    9.87    1.59 
  -1  19   0   10.32    1.87 
  -1  19   0   11.60    1.64 
   1  19   0    7.51    1.28 
  -1  19   0   10.06    1.78 
   1  19   0    9.91    1.68 
  -2 -19   0   27.55    2.92 
   2 -19   0   37.36    3.05 
  -2  19   0   24.99    2.70 
   2  19   0   32.87    2.57 
   2  19   0   29.87    2.09 
   2  19   0   29.09    2.89 
  -2  19   0   36.07    2.91 
  -2  19   0   30.37    2.69 
   2  19   0   34.25    2.52 
   2  19   0   29.79    2.61 
   2  19   0   31.18    2.52 
   3 -19   0    1.21    0.87 
  -3 -19   0    3.02    1.42 
   3  19   0    1.68    0.84 
   3  19   0    1.25    0.45 
   3  19   0    1.46    0.82 
   3  19   0    2.14    0.88 
  -3  19   0    5.84    1.18 
   3  19   0    1.05    0.69 
  -3  19   0    1.57    1.22 
   0 -20   0   38.85    3.48 
   0  20   0   39.93    2.96 
   0  20   0   36.61    3.33 
   0  20   0   44.49    3.25 
   0  20   0   45.14    3.51 
   0  20   0   40.49    3.20 
   0  20   0   39.06    3.13 
   1 -20   0   18.70    2.36 
  -1 -20   0   16.15    2.13 
   1  20   0   18.82    2.05 
  -1  20   0   14.39    2.20 
   1  20   0   17.76    1.77 
   1  20   0   18.52    2.17 
  -1  20   0   17.43    2.23 
  -1  20   0   18.98    2.34 
  -1  20   0   15.63    1.94 
  -1  20   0   19.53    2.08 
   1  20   0   15.27    2.06 
   1  20   0   16.37    2.02 
   1  20   0   19.07    2.09 
  -1  20   0   21.65    2.39 
   9   0  -1    0.07    0.27 
   9   0  -1    0.90    0.94 
  -9   0   1    0.09    0.76 
   9   0  -1    0.11    0.38 
   9   0  -1   -0.43    0.50 
   8   0  -1   -0.40    0.29 
   8   0  -1   -0.59    0.64 
   8   0  -1   -0.05    0.37 
   8   0  -1    0.43    0.37 
   8   0  -1   -0.31    0.50 
  -8   0   1    0.03    1.00 
   7   0  -1    0.23    0.33 
   7   0  -1    0.33    0.36 
   7   0  -1    0.33    0.36 
   7   0  -1   -0.07    0.48 
   7   0  -1    0.35    0.33 
   7   0  -1    0.20    0.75 
   7   0  -1    0.55    0.44 
   6   0  -1    0.13    0.27 
   6   0  -1   -0.22    0.24 
   6   0  -1    0.08    0.25 
   6   0  -1   -0.16    0.51 
   6   0  -1    0.71    0.63 
   6   0  -1   -0.14    0.38 
   6   0  -1    0.22    0.29 
   5   0  -1   -0.46    0.27 
   5   0  -1    0.00    0.21 
   5   0  -1    0.28    0.47 
   5   0  -1   -0.25    0.31 
   5   0  -1   -0.14    0.19 
   5   0  -1    0.08    0.21 
   4   0  -1   -0.22    0.05 
   4   0  -1    0.23    0.38 
   4   0  -1   -0.04    0.17 
   4   0  -1   -0.44    0.32 
   4   0  -1   -0.15    0.09 
   4   0  -1   -0.30    0.16 
   4   0  -1    0.02    0.18 
   4   0  -1   -0.21    0.21 
   3   0  -1   -0.14    0.18 
   3   0  -1   -0.02    0.09 
   3   0  -1    0.01    0.14 
   3   0  -1   -0.17    0.12 
   3   0  -1   -0.01    0.13 
   3   0  -1   -0.03    0.10 
   3   0  -1    0.01    0.23 
   3   0  -1   -0.04    0.20 
   3   0  -1   -0.03    0.13 
   3   0  -1   -0.17    0.20 
   2   0  -1    0.13    0.19 
  -2   0   1    0.09    0.12 
   2   0  -1    0.03    0.17 
   2   0  -1    0.08    0.10 
   2   0  -1    0.20    0.11 
   2   0  -1    0.10    0.11 
  -2   0   1    0.15    0.11 
   2   0  -1    0.05    0.23 
  -2   0   1   -0.08    0.11 
   2   0  -1    0.02    0.08 
  -2   0   1   -0.03    0.10 
  -2   0   1   -0.13    0.16 
  -2   0   1   -0.02    0.08 
   2   0  -1    0.04    0.11 
   2   0  -1    0.10    0.16 
   1   0  -1    0.02    0.06 
  -1   0   1    0.09    0.07 
   1   0  -1    0.05    0.06 
  -1   0   1    0.03    0.06 
   1   0  -1   -0.06    0.09 
   1   0  -1    0.05    0.06 
  -1   0   1    0.20    0.11 
  -1   0   1   -0.02    0.08 
  -1   0   1    0.08    0.05 
   1   0  -1    0.01    0.05 
  -1   0   1    0.09    0.07 
  -1   0   1    0.04    0.06 
   1   0  -1    0.09    0.06 
   1   0  -1    0.02    0.06 
   1   0  -1   -0.06    0.11 
  -1   0   1    0.10    0.06 
   1   0  -1    0.06    0.12 
  -1   0   1   -0.03    0.05 
  -1   0   1   -0.03    0.09 
   1   0  -1    0.01    0.06 
  -1   0   1    0.16    0.05 
  -1   0  -1    0.24    0.11 
   1   0   1    0.24    0.10 
   1   0   1    0.44    0.12 
   1   0   1    0.33    0.12 
  -1   0  -1    0.23    0.10 
   1   0   1    0.21    0.10 
   1   0   1    0.20    0.08 
  -1   0  -1    0.32    0.07 
  -1   0  -1    0.13    0.10 
  -1   0  -1    0.07    0.09 
   1   0   1    0.22    0.11 
  -1   0  -1    0.20    0.14 
   1   0   1    0.06    0.13 
   1   0   1    0.29    0.14 
   1   0   1    0.25    0.11 
  -1   0  -1    0.33    0.10 
  -1   0  -1    0.34    0.17 
  -1   0  -1    0.28    0.11 
   1   0   1    0.26    0.12 
  -1   0  -1    0.16    0.11 
   2   0   1    0.02    0.17 
   2   0   1    0.10    0.10 
   2   0   1    0.14    0.15 
   2   0   1    0.33    0.15 
   2   0   1    0.21    0.24 
   2   0   1    0.33    0.15 
  -2   0  -1    0.20    0.15 
   2   0   1    0.21    0.15 
   2   0   1    0.47    0.16 
   2   0   1    0.35    0.23 
   2   0   1    0.27    0.16 
   2   0   1    0.32    0.16 
  -2   0  -1    0.24    0.14 
   2   0   1    0.20    0.15 
  -2   0  -1    0.53    0.17 
   3   0   1    0.12    0.17 
  -3   0  -1    0.05    0.19 
   3   0   1    0.19    0.15 
  -3   0  -1    0.08    0.18 
   3   0   1   -0.03    0.15 
   3   0   1   -0.01    0.14 
   3   0   1    0.09    0.16 
   3   0   1    0.00    0.31 
   3   0   1   -0.11    0.19 
   3   0   1   -0.21    0.15 
   3   0   1    0.29    0.19 
   3   0   1    0.15    0.33 
   3   0   1   -0.04    0.16 
   4   0   1   -0.07    0.24 
   4   0   1    0.19    0.17 
   4   0   1    0.40    0.21 
   4   0   1    0.40    0.41 
   4   0   1    0.08    0.38 
   4   0   1   -0.25    0.16 
   4   0   1    0.07    0.21 
   4   0   1    0.12    0.22 
   4   0   1    0.13    0.19 
   4   0   1    0.33    0.22 
   5   0   1   -0.24    0.24 
   5   0   1   -0.10    0.15 
   5   0   1    0.01    0.24 
   5   0   1   -0.16    0.44 
   5   0   1   -0.24    0.21 
   5   0   1   -0.04    0.24 
   5   0   1   -0.43    0.25 
   5   0   1    0.05    0.21 
   5   0   1   -0.39    0.26 
   5   0   1   -0.14    0.22 
   6   0   1   -0.14    0.26 
   6   0   1    0.07    0.34 
   6   0   1    0.19    0.33 
   6   0   1    0.44    0.60 
   6   0   1   -0.44    0.53 
   6   0   1   -0.13    0.28 
   6   0   1   -0.76    0.28 
   6   0   1    0.18    0.40 
   7   0   1    1.91    0.86 
   7   0   1    0.22    0.36 
   7   0   1    0.50    0.40 
   7   0   1    0.51    0.41 
   7   0   1    1.03    0.64 
   7   0   1    0.39    0.36 
   8   0   1    0.13    0.52 
   8   0   1    0.63    0.43 
   8   0   1    0.67    0.74 
   8   0   1    0.59    0.41 
   9   0   1   -0.33    0.79 
   9   0   1   -1.04    0.44 
   9   0   1   -0.14    0.35 
   9   0   1   -0.24    0.38 
  -9   0  -1   -0.11    0.89 
   9  -1  -1    4.13    1.29 
   9  -1  -1    3.06    0.70 
   9  -1  -1    4.22    1.19 
  -9  -1   1    4.47    1.31 
   9  -1  -1    2.74    0.61 
  -9   1   1    4.48    1.44 
   9   1  -1    4.02    1.13 
   9   1  -1    4.84    1.31 
   9   1  -1    3.93    0.53 
   8  -1  -1    4.32    1.22 
   8  -1  -1    3.33    0.64 
   8  -1  -1    3.64    1.05 
   8  -1  -1    4.80    0.72 
   8   1  -1    3.92    1.07 
   8   1  -1    3.55    0.38 
   8   1  -1    2.58    1.01 
  -8   1   1    3.37    1.35 
   8   1  -1    3.77    0.55 
   8   1  -1    3.68    0.40 
   8   1  -1    4.52    0.61 
   7  -1  -1    0.04    0.38 
   7  -1  -1    0.99    0.76 
   7  -1  -1    0.54    0.73 
   7  -1  -1    0.52    0.45 
   7  -1  -1    0.32    0.38 
   7  -1  -1    0.07    0.38 
   7   1  -1    0.59    0.32 
   7   1  -1    0.49    0.29 
   7   1  -1    0.48    0.29 
  -7   1   1    1.12    1.01 
   7   1  -1    0.32    0.24 
   7   1  -1    0.13    0.65 
   7   1  -1    0.60    0.69 
   7   1  -1    0.64    0.51 
   6  -1  -1    0.03    0.13 
   6  -1  -1   -0.14    0.28 
   6  -1  -1    0.60    0.36 
   6  -1  -1   -0.19    0.36 
   6  -1  -1    0.25    0.39 
   6  -1  -1    0.10    0.15 
   6  -1  -1   -0.12    0.38 
   6  -1  -1    0.05    0.31 
   6   1  -1    0.20    0.25 
   6   1  -1    0.38    0.45 
   6   1  -1    0.09    0.21 
   6   1  -1   -0.02    0.23 
   6   1  -1    0.09    0.50 
   6   1  -1    0.48    0.57 
   6   1  -1   -0.09    0.22 
  -6   1   1   -0.01    0.53 
   5  -1  -1   22.76    1.47 
   5  -1  -1   30.00    1.66 
   5  -1  -1   30.18    1.55 
   5  -1  -1   28.60    1.96 
   5  -1  -1   28.04    1.37 
   5  -1  -1   27.67    1.54 
   5  -1  -1   26.28    1.47 
   5  -1  -1   28.85    1.38 
   5  -1  -1   27.14    1.88 
   5   1  -1   30.76    1.39 
   5   1  -1   25.93    1.86 
   5   1  -1   29.09    1.88 
   5   1  -1   28.93    1.40 
   5   1  -1   29.34    1.39 
   5   1  -1   27.45    1.88 
   5   1  -1   27.88    1.68 
   4  -1  -1   -0.01    0.21 
   4  -1  -1   -0.07    0.20 
   4  -1  -1    0.20    0.22 
   4  -1  -1   -0.14    0.20 
   4  -1  -1   -0.48    0.33 
   4  -1  -1    0.39    0.41 
   4  -1  -1    0.04    0.21 
   4   1  -1    0.19    0.15 
   4   1  -1   -0.08    0.24 
   4   1  -1    0.05    0.14 
   4   1  -1   -0.04    0.25 
   4   1  -1    0.30    0.28 
   4   1  -1    0.01    0.16 
   4   1  -1   -0.07    0.13 
   4   1  -1    0.02    0.35 
   3  -1  -1   20.32    1.02 
   3  -1  -1   21.30    1.28 
   3  -1  -1   18.70    0.98 
   3  -1  -1   19.36    1.24 
   3  -1  -1   19.15    0.99 
   3  -1  -1   19.03    0.98 
   3  -1  -1   19.67    1.07 
   3   1  -1   16.33    1.06 
   3   1  -1   17.15    1.17 
  -3   1   1   19.31    0.99 
  -3   1   1   19.34    1.01 
  -3   1   1   19.81    1.00 
   3   1  -1   16.66    0.85 
  -3   1   1   18.81    1.05 
   3   1  -1   17.92    0.86 
  -3   1   1   18.95    1.01 
   3   1  -1   14.32    1.12 
   3   1  -1   15.99    0.84 
   3   1  -1   14.66    1.10 
   2  -1  -1    6.72    0.52 
   2  -1  -1    7.09    0.49 
   2  -1  -1    7.21    0.63 
   2  -1  -1    6.40    0.61 
   2  -1  -1    6.97    0.50 
   2  -1  -1    7.23    0.52 
   2  -1  -1    6.01    0.46 
   2  -1  -1    7.77    0.49 
   2  -1  -1    7.83    0.45 
   2  -1  -1    7.31    0.50 
  -2   1   1    6.46    0.46 
  -2   1   1    6.24    0.48 
  -2   1   1    5.53    0.46 
  -2   1   1    7.04    0.55 
   2   1  -1    8.36    0.59 
   2   1  -1    7.94    0.61 
   2   1  -1    8.82    0.37 
   2   1  -1    8.78    0.36 
  -2   1   1    7.56    0.54 
  -2   1   1    6.48    0.63 
   2   1  -1    7.73    0.61 
  -2   1   1    6.32    0.48 
   2   1  -1    8.90    0.37 
   2   1  -1    8.79    0.63 
   1  -1  -1   15.88    0.80 
   1  -1  -1   16.48    0.84 
   1  -1  -1   16.68    0.81 
   1  -1  -1   18.05    0.88 
   1  -1  -1   16.06    0.79 
   1  -1  -1   15.25    0.80 
   1  -1  -1   16.77    0.83 
   1  -1  -1   17.45    0.82 
   1  -1  -1   17.00    0.86 
  -1  -1   1   16.87    0.84 
  -1  -1   1   15.31    0.84 
   1  -1  -1   16.32    0.80 
  -1  -1   1   17.30    0.82 
   1  -1  -1   15.88    0.85 
  -1  -1   1   15.85    0.84 
  -1   1   1   16.50    0.80 
  -1   1   1   16.92    0.81 
  -1   1   1   16.69    0.86 
  -1   1   1   16.20    0.86 
  -1   1   1   17.30    0.81 
  -1   1   1   17.29    0.82 
  -1   1   1   16.21    0.86 
  -1   1   1   17.62    0.84 
  -1   1   1   15.54    0.80 
   1   1  -1   16.19    0.84 
   1   1  -1   15.99    0.81 
  -1   1   1   16.75    0.80 
   1   1  -1   16.55    0.85 
   1   1  -1   16.02    0.84 
  -1   1   1   16.46    0.84 
   0  -1   1   53.94    2.44 
   0  -1   1   56.03    2.46 
   0  -1   1   54.32    2.42 
   0  -1   1   59.23    2.43 
   0  -1  -1   55.74    2.42 
   0  -1   1   55.73    2.46 
   0  -1   1   63.16    2.40 
   0  -1  -1   58.43    2.42 
   0  -1  -1   53.37    2.42 
   0  -1   1   51.69    2.42 
   0  -1  -1   56.03    2.44 
   0  -1   1   47.79    2.41 
   0   1  -1   56.64    2.42 
   0   1   1   57.13    2.42 
   0   1   1   57.83    2.41 
   0   1  -1   58.93    2.42 
   0   1  -1   58.20    2.40 
   0   1  -1   58.99    2.42 
   0   1   1   56.92    2.39 
   0   1   1   57.47    2.43 
   0   1   1   59.41    2.43 
   0   1  -1   55.64    2.47 
   0   1   1   55.59    2.42 
   0   1  -1   60.36    2.49 
   0   1   1   56.38    2.49 
   0   1   1   56.85    2.44 
   0   1  -1   60.57    2.50 
   0   1   1   55.61    2.42 
   0   1  -1   55.45    2.42 
   0   1  -1   58.25    2.43 
   0   1   1   56.67    2.44 
   0   1  -1   60.95    2.46 
   1  -1   1   30.92    1.45 
   1  -1   1   32.09    1.45 
  -1  -1  -1   32.25    1.44 
  -1  -1  -1   31.66    1.45 
   1  -1   1   30.73    1.49 
  -1  -1  -1   33.62    1.42 
  -1  -1  -1   31.17    1.38 
  -1  -1  -1   31.84    1.40 
   1  -1   1   28.90    1.45 
   1  -1   1   31.74    1.35 
   1  -1   1   30.98    1.50 
  -1  -1  -1   32.86    1.40 
   1  -1   1   32.77    1.45 
   1  -1   1   32.32    1.52 
   1  -1   1   31.50    1.46 
  -1  -1  -1   32.18    1.42 
   1  -1   1   31.81    1.46 
  -1  -1  -1   31.05    1.41 
  -1  -1  -1   32.27    1.43 
   1  -1   1   32.56    1.46 
  -1  -1  -1   31.94    1.38 
  -1  -1  -1   31.02    1.40 
  -1  -1  -1   30.05    1.51 
  -1  -1  -1   33.14    1.43 
  -1   1  -1   30.52    1.46 
   1   1   1   32.36    1.41 
  -1   1  -1   29.12    1.44 
  -1   1  -1   29.64    1.44 
  -1   1  -1   30.58    1.35 
  -1   1  -1   32.06    1.46 
  -1   1  -1   31.17    1.45 
   1   1   1   33.10    1.41 
   1   1   1   31.13    1.38 
  -1   1  -1   32.81    1.47 
   1   1   1   31.20    1.51 
  -1   1  -1   30.79    1.51 
  -1   1  -1   32.04    1.41 
  -1   1  -1   31.38    1.50 
   1   1   1   32.36    1.41 
   1   1   1   32.45    1.41 
   1   1   1   33.77    1.43 
   1   1   1   33.04    1.40 
   1   1   1   32.21    1.43 
   1   1   1   31.91    1.34 
   1   1   1   30.92    1.41 
   1   1   1   31.30    1.43 
  -1   1  -1   28.99    1.50 
   1   1   1   33.11    1.35 
  -1   1  -1   31.47    1.45 
  -2  -1  -1   13.63    0.71 
   2  -1   1   14.20    0.69 
   2  -1   1   13.49    0.78 
   2  -1   1   12.91    0.89 
  -2  -1  -1   12.77    0.76 
   2  -1   1   13.79    0.75 
   2  -1   1   13.77    0.79 
   2  -1   1   12.76    0.90 
   2  -1   1   13.26    0.78 
  -2  -1  -1   13.57    0.69 
   2  -1   1   14.01    0.78 
   2  -1   1   12.57    0.89 
   2  -1   1   14.61    0.80 
   2   1   1   12.91    0.70 
   2   1   1   13.30    0.90 
   2   1   1   14.07    0.70 
  -2   1  -1   13.47    0.70 
   2   1   1   13.94    0.72 
  -2   1  -1   13.59    0.79 
  -2   1  -1   13.55    0.79 
   2   1   1   14.12    0.71 
   2   1   1   13.76    0.65 
   2   1   1   13.21    0.82 
   2   1   1   14.30    0.69 
   2   1   1   13.98    0.71 
   2   1   1   13.12    0.83 
  -2   1  -1   13.42    0.77 
   3  -1   1   22.27    1.23 
   3  -1   1   21.16    1.22 
   3  -1   1   22.47    1.16 
   3  -1   1   21.63    1.44 
   3  -1   1   21.28    1.13 
   3  -1   1   20.30    1.21 
   3  -1   1   23.62    1.21 
   3  -1   1   21.32    1.40 
   3  -1   1   21.32    1.42 
   3  -1   1   20.31    1.23 
   3  -1   1   21.94    1.23 
   3   1   1   26.44    1.18 
   3   1   1   25.72    1.17 
  -3   1  -1   21.92    1.24 
   3   1   1   27.16    1.43 
   3   1   1   24.93    1.26 
  -3   1  -1   21.06    1.23 
  -3   1  -1   20.29    1.21 
   3   1   1   26.36    1.19 
  -3   1  -1   22.46    1.18 
   3   1   1   25.10    1.06 
   3   1   1   28.88    1.15 
   3   1   1   24.88    1.40 
   3   1   1   26.42    1.18 
   3   1   1   24.10    1.46 
   4  -1   1    2.26    0.64 
   4  -1   1    2.19    0.36 
   4  -1   1    1.69    0.48 
   4  -1   1    1.73    0.40 
   4  -1   1    2.08    0.36 
   4  -1   1    1.70    0.37 
   4  -1   1    2.33    0.39 
   4  -1   1    2.80    0.53 
   4  -1   1    2.45    0.38 
   4   1   1    1.60    0.49 
   4   1   1    2.24    0.34 
   4   1   1    1.75    0.52 
   4   1   1    1.82    0.39 
   4   1   1    2.34    0.56 
  -4   1  -1    1.55    0.38 
   4   1   1    2.19    0.27 
   4   1   1    1.88    0.30 
   4   1   1    2.10    0.33 
   4   1   1    1.96    0.31 
   5  -1   1    2.95    0.43 
   5  -1   1    2.10    0.69 
   5  -1   1    2.02    0.47 
   5  -1   1    2.20    0.47 
   5  -1   1    2.17    0.65 
   5  -1   1    4.39    0.71 
   5  -1   1    2.03    0.43 
   5  -1   1    1.83    0.39 
   5  -1   1    2.24    0.48 
   5  -1   1    2.11    0.47 
   5   1   1    2.41    0.50 
   5   1   1    3.76    0.44 
   5   1   1    2.56    0.39 
   5   1   1    3.10    0.42 
   5   1   1    2.48    0.62 
   5   1   1    2.80    0.60 
   5   1   1    2.91    0.40 
   5   1   1    2.54    0.65 
   6  -1   1    0.42    0.36 
   6  -1   1    0.31    0.25 
   6  -1   1    0.69    0.36 
   6  -1   1    0.30    0.34 
   6  -1   1    0.59    0.50 
   6  -1   1    0.11    0.35 
   6  -1   1    0.68    0.38 
   6  -1   1    1.01    0.64 
   6   1   1    1.09    0.33 
   6   1   1    1.18    0.35 
   6   1   1    0.96    0.54 
   6   1   1    0.67    0.32 
   6   1   1    0.86    0.60 
   6   1   1    0.67    0.31 
   6   1   1    0.67    0.32 
   6   1   1    0.57    0.57 
   7  -1   1    1.53    0.49 
   7  -1   1    0.51    0.41 
   7  -1   1    1.32    0.66 
   7  -1   1    2.76    0.92 
   7   1   1    1.02    0.40 
   7   1   1    1.08    0.61 
   7   1   1    1.03    0.42 
   7   1   1    0.82    0.56 
   7   1   1    0.58    0.50 
   7   1   1    0.05    0.32 
   7   1   1    0.20    0.33 
   8  -1   1    5.30    0.79 
   8  -1   1    5.93    1.24 
   8  -1   1    5.38    1.07 
   8  -1   1    5.22    0.81 
   8   1   1    5.36    1.22 
   8   1   1    5.65    0.66 
   8   1   1    4.57    0.68 
   8   1   1    5.41    1.21 
   8   1   1    5.97    0.61 
   9  -1   1    4.80    0.77 
   9  -1   1    4.22    0.77 
   9  -1   1    3.63    1.15 
   9  -1   1    3.64    1.31 
   9   1   1    5.71    1.46 
   9   1   1    5.25    1.13 
   9   1   1    4.72    0.70 
   9   1   1    4.94    0.47 
  -9   1  -1    3.10    1.25 
   9  -2  -1   14.42    1.21 
   9  -2  -1   15.01    1.94 
   9  -2  -1   14.17    1.16 
   9  -2  -1   14.74    1.77 
  -9  -2   1    9.75    1.62 
   9   2  -1   15.59    1.84 
   9   2  -1   12.47    0.63 
   9   2  -1   12.00    1.57 
  -9   2   1   12.80    1.81 
   8  -2  -1    0.01    0.43 
   8  -2  -1    0.34    0.44 
   8  -2  -1    0.52    0.63 
   8  -2  -1    0.70    0.79 
   8   2  -1    0.58    0.25 
   8   2  -1    0.22    0.26 
  -8   2   1    0.18    0.79 
   8   2  -1    0.04    0.71 
   8   2  -1    0.31    0.53 
   7  -2  -1    2.65    0.34 
   7  -2  -1    2.97    0.34 
   7  -2  -1    2.10    0.56 
   7  -2  -1    3.45    0.96 
   7  -2  -1    3.24    0.97 
   7  -2  -1    2.04    0.59 
   7   2  -1    2.36    0.84 
   7   2  -1    2.82    0.40 
   7   2  -1    2.08    0.35 
  -7   2   1    2.85    0.97 
   7   2  -1    2.11    0.63 
   7   2  -1    3.24    0.85 
   6  -2  -1   36.15    2.46 
   6  -2  -1   40.62    1.89 
   6  -2  -1   38.49    2.11 
   6  -2  -1   41.88    2.11 
   6  -2  -1   36.08    1.98 
   6  -2  -1   38.10    2.05 
   6  -2  -1   35.97    2.05 
   6  -2  -1   40.06    1.87 
   6  -2  -1   31.98    2.39 
   6   2  -1   36.79    1.76 
   6   2  -1   37.17    1.64 
   6   2  -1   34.98    2.18 
   6   2  -1   39.56    2.46 
   6   2  -1   34.41    2.39 
   6   2  -1   35.39    2.41 
  -6   2   1   40.07    2.61 
   6   2  -1   38.59    1.78 
   6   2  -1   39.07    1.64 
   5  -2  -1   51.94    3.01 
   5  -2  -1   54.23    2.61 
   5  -2  -1   51.79    2.60 
   5  -2  -1   49.37    2.94 
   5  -2  -1   54.99    2.66 
   5  -2  -1   53.65    2.57 
   5  -2  -1   53.83    2.61 
   5   2  -1   51.87    2.89 
   5   2  -1   51.89    2.74 
   5   2  -1   52.22    2.25 
   5   2  -1   52.36    2.33 
  -5   2   1   51.02    3.01 
   5   2  -1   53.27    2.25 
   5   2  -1   53.86    2.92 
   5   2  -1   51.16    2.31 
   5   2  -1   53.31    2.91 
   4  -2  -1    3.17    0.48 
   4  -2  -1    2.03    0.41 
   4  -2  -1    1.95    0.39 
   4  -2  -1    2.40    0.45 
   4  -2  -1    2.66    0.42 
   4  -2  -1    2.33    0.52 
   4  -2  -1    2.38    0.53 
  -4   2   1    2.32    0.57 
   4   2  -1    2.81    0.18 
  -4   2   1    1.98    0.42 
   4   2  -1    2.99    0.52 
   4   2  -1    2.66    0.50 
   4   2  -1    2.85    0.23 
   4   2  -1    3.05    0.25 
   4   2  -1    3.20    0.53 
   4   2  -1    3.14    0.51 
  -4   2   1    2.22    0.61 
  -4   2   1    2.20    0.41 
   4   2  -1    2.76    0.18 
   3  -2  -1   22.88    1.41 
   3  -2  -1   23.03    1.15 
   3  -2  -1   23.05    1.22 
   3  -2  -1   22.46    1.24 
   3  -2  -1   21.09    1.20 
   3  -2  -1   22.10    1.22 
   3  -2  -1   21.83    1.42 
   3  -2  -1   23.52    1.23 
   3  -2  -1   23.28    1.22 
  -3   2   1   20.21    1.27 
   3   2  -1   21.51    1.32 
  -3   2   1   23.26    1.42 
   3   2  -1   22.39    0.96 
  -3   2   1   21.49    1.22 
  -3   2   1   22.90    1.22 
  -3   2   1   21.34    1.20 
   3   2  -1   22.64    1.33 
   3   2  -1   21.23    1.31 
  -3   2   1   22.18    1.23 
   3   2  -1   21.99    1.29 
   3   2  -1   22.32    0.96 
   2  -2  -1   86.36    3.68 
   2  -2  -1   89.20    3.70 
   2  -2  -1   89.00    3.69 
   2  -2  -1   85.95    3.69 
   2  -2  -1   77.71    3.66 
   2  -2  -1   82.67    3.68 
   2  -2  -1   80.40    3.79 
   2  -2  -1   88.04    3.71 
   2  -2  -1   82.97    3.80 
   2  -2  -1   83.61    3.64 
   2  -2  -1   82.58    3.72 
   2   2  -1   84.54    3.76 
   2   2  -1   82.67    3.73 
  -2   2   1   83.63    3.69 
  -2   2   1   87.45    3.70 
  -2   2   1   81.79    3.53 
   2   2  -1   80.65    3.72 
  -2   2   1   82.27    3.67 
   2   2  -1   82.80    3.72 
  -2   2   1   84.70    3.74 
  -2   2   1   79.96    3.80 
  -2   2   1   79.33    3.66 
  -1  -2   1  119.92    5.33 
   1  -2  -1  119.27    5.20 
  -1  -2   1  122.56    5.09 
   1  -2  -1  119.13    5.21 
  -1  -2   1  127.57    5.06 
  -1  -2   1  123.13    5.21 
   1  -2  -1  117.79    5.16 
  -1  -2   1  123.29    5.02 
   1  -2  -1  132.01    5.19 
  -1  -2   1  119.29    5.01 
   1  -2  -1  120.41    5.19 
   1  -2  -1  113.80    5.31 
  -1  -2   1  118.94    5.03 
   1  -2  -1  116.72    5.17 
  -1  -2   1  125.91    5.10 
  -1  -2   1  123.02    5.05 
  -1  -2   1  121.33    5.12 
  -1  -2   1  118.04    5.18 
  -1  -2   1  124.72    5.20 
   1  -2  -1  116.88    5.18 
   1  -2  -1  123.72    5.11 
   1  -2  -1  120.99    5.16 
  -1  -2   1  123.69    5.06 
   1  -2  -1  120.34    5.17 
   1  -2  -1  125.24    5.18 
   1  -2  -1  123.20    5.17 
   1   2  -1  122.49    5.21 
  -1   2   1  119.93    5.17 
   1   2  -1  121.52    5.05 
   1   2  -1  125.89    5.05 
  -1   2   1  120.89    5.17 
   1   2  -1  118.84    5.04 
  -1   2   1  123.40    5.18 
   1   2  -1  124.18    5.06 
   1   2  -1  121.85    5.07 
  -1   2   1  121.10    5.14 
   1   2  -1  117.87    5.21 
   1   2  -1  123.56    5.05 
   1   2  -1  124.74    5.06 
  -1   2   1  116.78    5.17 
  -1   2   1  121.55    5.18 
  -1   2   1  127.10    5.19 
  -1   2   1  119.34    5.16 
  -1   2   1  119.76    5.21 
  -1   2   1  117.23    5.16 
  -1   2   1  119.94    5.20 
   1   2  -1  121.28    5.05 
   1   2  -1  122.67    5.12 
  -1   2   1  115.92    5.19 
  -1   2   1  116.18    5.20 
  -1   2   1  124.64    5.18 
   0  -2  -1   64.68    2.86 
   0  -2  -1   67.68    2.78 
   0  -2  -1   65.09    2.87 
   0  -2  -1   62.90    2.81 
   0  -2   1   71.82    2.80 
   0  -2   1   65.86    2.91 
   0  -2  -1   68.37    2.79 
   0  -2   1   66.68    2.88 
   0  -2   1   70.02    2.88 
   0  -2   1   66.88    2.88 
   0  -2   1   65.09    2.82 
   0  -2  -1   64.40    2.87 
   0  -2  -1   65.52    2.88 
   0  -2   1   68.40    2.85 
   0  -2   1   59.13    2.88 
   0  -2  -1   66.64    2.85 
   0  -2  -1   63.06    2.89 
   0  -2  -1   63.16    2.87 
   0  -2   1   66.76    2.87 
   0  -2   1   69.43    2.87 
   0  -2  -1   62.33    2.89 
   0  -2   1   68.63    2.87 
   0  -2   1   66.13    2.87 
   0  -2   1   61.47    2.86 
   0  -2  -1   66.56    2.89 
   0  -2   1   66.17    2.90 
   0  -2  -1   65.49    2.90 
   0  -2  -1   67.15    2.87 
   0  -2  -1   71.06    2.93 
   0   2   1   65.10    2.87 
   0   2   1   66.44    2.78 
   0   2   1   64.85    2.87 
   0   2  -1   66.86    2.94 
   0   2  -1   72.64    2.82 
   0   2  -1   66.42    2.87 
   0   2   1   63.19    2.89 
   0   2   1   62.32    2.86 
   0   2  -1   66.93    2.87 
   0   2  -1   69.14    2.86 
   0   2  -1   68.98    2.83 
   0   2  -1   68.00    2.86 
   0   2   1   65.78    2.88 
   0   2   1   65.26    2.87 
   0   2  -1   70.03    2.87 
   0   2   1   63.39    2.81 
   0   2  -1   65.61    2.89 
   0   2  -1   68.33    2.87 
   0   2  -1   69.93    2.88 
   0   2   1   64.06    2.84 
   0   2  -1   65.87    2.87 
   0   2   1   65.31    2.91 
   0   2   1   63.68    2.87 
   0   2  -1   69.51    2.80 
   0   2   1   67.91    2.87 
   0   2   1   67.60    2.79 
   0   2   1   65.30    2.89 
   0   2   1   66.55    2.91 
   1  -2   1  121.68    5.27 
   1  -2   1  126.59    5.22 
  -1  -2  -1  123.00    5.13 
   1  -2   1  123.30    5.23 
  -1  -2  -1  121.55    5.12 
   1  -2   1  121.10    5.27 
  -1  -2  -1  122.37    5.10 
   1  -2   1  128.96    5.22 
  -1  -2  -1  121.64    5.10 
   1  -2   1  126.31    5.14 
  -1  -2  -1  121.67    5.11 
   1  -2   1  126.31    5.18 
  -1  -2  -1  121.94    5.12 
  -1  -2  -1  122.65    5.38 
   1  -2   1  121.24    5.22 
   1  -2   1  128.67    5.23 
   1  -2   1  122.34    5.22 
  -1  -2  -1  117.18    5.23 
   1  -2   1  124.31    5.24 
  -1   2  -1  117.58    5.18 
   1   2   1  121.61    5.10 
  -1   2  -1  121.94    5.22 
  -1   2  -1  126.89    5.23 
  -1   2  -1  127.88    5.22 
   1   2   1  120.61    5.12 
   1   2   1  123.51    5.14 
  -1   2  -1  120.65    5.22 
  -1   2  -1  120.18    5.22 
   1   2   1  118.39    5.24 
  -1   2  -1  118.83    5.22 
  -1   2  -1  118.40    5.22 
  -1   2  -1  113.97    5.12 
   1   2   1  119.08    5.15 
   1   2   1  118.21    5.23 
   1   2   1  123.91    5.09 
   1   2   1  120.95    5.13 
   1   2   1  121.34    5.13 
  -1   2  -1  128.67    5.24 
   1   2   1  121.67    5.13 
   1   2   1  120.17    5.10 
   1   2   1  121.04    5.07 
   2  -2   1   71.86    3.34 
  -2  -2  -1   69.51    3.09 
   2  -2   1   72.20    3.21 
  -2  -2  -1   69.98    3.05 
   2  -2   1   68.96    3.31 
   2  -2   1   70.82    3.08 
   2  -2   1   70.22    3.18 
   2  -2   1   68.85    3.17 
  -2  -2  -1   68.64    3.22 
   2  -2   1   71.84    3.21 
   2  -2   1   70.92    3.22 
   2  -2   1   72.29    3.21 
   2  -2   1   69.79    3.20 
  -2   2  -1   75.94    3.22 
   2   2   1   72.49    3.06 
   2   2   1   73.24    3.08 
   2   2   1   74.17    3.08 
   2   2   1   71.21    3.19 
  -2   2  -1   71.12    3.20 
   2   2   1   70.31    3.06 
  -2   2  -1   72.42    3.08 
  -2   2  -1   71.15    3.22 
   2   2   1   73.49    3.05 
   2   2   1   72.51    3.09 
   2   2   1   73.52    3.06 
   2   2   1   72.83    3.19 
  -2   2  -1   68.78    3.10 
   2   2   1   67.23    3.28 
   3  -2   1   14.27    0.92 
   3  -2   1   12.50    1.05 
   3  -2   1   13.39    0.91 
   3  -2   1   14.86    0.92 
   3  -2   1   13.74    0.79 
   3  -2   1   14.71    0.87 
   3  -2   1   13.02    0.91 
   3  -2   1   12.97    0.89 
   3  -2   1   14.21    1.08 
   3   2   1   14.82    0.76 
   3   2   1   14.46    0.76 
   3   2   1   13.55    0.97 
   3   2   1   15.60    0.77 
   3   2   1   14.84    0.70 
  -3   2  -1   15.33    0.95 
  -3   2  -1   13.56    0.66 
  -3   2  -1   12.78    0.91 
   3   2   1   14.01    0.97 
   3   2   1   16.70    1.11 
  -3   2  -1   13.30    0.89 
   3   2   1   14.98    0.77 
   3   2   1   15.69    0.79 
  -3   2  -1   14.48    0.81 
   4  -2   1   -0.24    0.21 
   4  -2   1    0.29    0.43 
   4  -2   1    0.06    0.26 
   4  -2   1   -0.12    0.22 
   4  -2   1    0.02    0.25 
   4  -2   1   -0.21    0.37 
   4  -2   1    0.06    0.18 
   4  -2   1   -0.17    0.23 
   4   2   1    0.30    0.16 
  -4   2  -1   -0.04    0.26 
  -4   2  -1    0.01    0.26 
   4   2   1    0.34    0.29 
   4   2   1    0.19    0.19 
   4   2   1    0.44    0.18 
   4   2   1    0.39    0.32 
   4   2   1    0.51    0.18 
  -4   2  -1   -0.43    0.24 
  -4   2  -1   -0.33    0.23 
   4   2   1    0.17    0.10 
   4   2   1    0.36    0.34 
   4   2   1    0.36    0.17 
  -4   2  -1   -0.07    0.28 
   5  -2   1   10.81    0.74 
   5  -2   1    7.55    0.94 
   5  -2   1    9.07    1.10 
   5  -2   1    8.80    0.79 
   5  -2   1   10.32    0.76 
   5  -2   1    8.99    0.81 
   5  -2   1    9.88    0.80 
   5  -2   1    9.92    0.84 
   5   2   1    6.95    0.90 
   5   2   1    8.53    0.65 
   5   2   1    8.19    0.60 
   5   2   1    8.93    0.93 
   5   2   1    8.46    0.64 
   5   2   1    8.63    0.59 
   5   2   1    8.98    0.62 
   5   2   1    9.34    1.06 
   6  -2   1   20.26    1.21 
   6  -2   1   20.27    1.36 
   6  -2   1   20.18    1.35 
   6  -2   1   19.96    1.67 
   6  -2   1   20.13    1.38 
   6  -2   1   18.95    1.27 
   6  -2   1   17.88    1.60 
   6  -2   1   21.79    1.39 
   6  -2   1   20.28    1.23 
   6   2   1   18.69    1.18 
   6   2   1   17.81    1.58 
   6   2   1   19.43    1.62 
   6   2   1   19.35    1.63 
   6   2   1   20.28    1.16 
   6   2   1   20.01    1.07 
   6   2   1   18.39    1.10 
   6   2   1   19.03    1.10 
   7  -2   1    2.22    0.86 
   7  -2   1    0.96    0.50 
   7  -2   1    1.93    0.73 
   7  -2   1    0.69    0.47 
   7   2   1    1.43    0.78 
   7   2   1    2.17    0.48 
   7   2   1    2.52    0.52 
   7   2   1    1.12    0.69 
   7   2   1    2.10    0.37 
   7   2   1    0.73    0.67 
   8  -2   1    0.93    0.70 
   8  -2   1    1.40    0.87 
   8  -2   1    1.06    0.56 
   8  -2   1    1.10    0.55 
  -8   2  -1    1.21    0.98 
   8   2   1    1.29    0.29 
   8   2   1    0.95    0.40 
   8   2   1    1.26    0.74 
   8   2   1    1.19    0.25 
   8   2   1    0.45    0.32 
   8   2   1    0.90    0.64 
   9  -2   1    2.85    0.74 
   9  -2   1    2.23    1.16 
   9  -2   1    2.02    0.67 
   9  -2   1    3.11    1.20 
   9   2   1    1.01    0.85 
  -9   2  -1    2.14    1.16 
   9   2   1    2.12    1.00 
   9   2   1    1.67    0.40 
   9  -3  -1    7.12    1.54 
   9  -3  -1    5.51    0.93 
   9  -3  -1    6.22    0.92 
   9  -3  -1    5.59    1.52 
  -9   3   1    5.04    1.46 
   9   3  -1    6.60    1.40 
   9   3  -1    7.15    1.41 
   8  -3  -1   37.62    2.17 
   8  -3  -1   35.10    2.71 
   8  -3  -1   37.28    1.64 
   8  -3  -1   35.41    2.73 
   8  -3  -1   35.17    1.64 
   8  -3  -1   29.82    2.08 
   8   3  -1   36.54    2.70 
  -8   3   1   35.09    2.82 
   8   3  -1   33.65    2.60 
   7  -3  -1    1.31    0.82 
   7  -3  -1    0.42    0.50 
   7  -3  -1    1.25    0.78 
   7  -3  -1    0.56    0.46 
   7  -3  -1    0.09    0.34 
   7  -3  -1    0.29    0.37 
   7   3  -1    0.68    0.11 
  -7   3   1    0.05    0.92 
   7   3  -1    0.98    0.58 
   7   3  -1    0.52    0.67 
   7   3  -1   -0.01    0.48 
   7   3  -1    0.86    0.13 
   7   3  -1    0.58    0.25 
   6  -3  -1    9.15    0.90 
   6  -3  -1    9.41    0.87 
   6  -3  -1    8.55    0.88 
   6  -3  -1    7.81    0.90 
   6  -3  -1    8.23    1.19 
   6  -3  -1    9.12    1.22 
   6  -3  -1    8.52    0.86 
   6   3  -1    8.09    1.01 
  -6   3   1    7.90    1.14 
   6   3  -1    9.58    0.48 
   6   3  -1    9.22    1.13 
   6   3  -1    9.58    1.13 
   6   3  -1    8.19    0.96 
   6   3  -1    9.16    0.47 
   5  -3  -1  119.35    5.30 
   5  -3  -1  115.17    5.26 
   5  -3  -1  113.27    5.66 
   5  -3  -1  115.34    5.30 
   5  -3  -1  116.81    5.26 
   5  -3  -1  117.31    5.68 
   5  -3  -1  115.82    5.28 
   5   3  -1  116.14    5.55 
   5   3  -1  115.12    4.83 
   5   3  -1  120.54    5.57 
   5   3  -1  117.03    4.83 
  -5   3   1  109.75    4.92 
   5   3  -1  117.40    5.53 
   5   3  -1  122.62    5.46 
   4  -3  -1  166.12    7.33 
   4  -3  -1  167.79    7.36 
   4  -3  -1  163.92    7.62 
   4  -3  -1  168.60    7.34 
   4  -3  -1  165.89    7.21 
   4  -3  -1  164.13    7.33 
   4  -3  -1  174.60    7.34 
   4  -3  -1  156.20    7.60 
   4   3  -1  166.76    7.50 
  -4   3   1  168.41    7.36 
  -4   3   1  176.99    7.39 
  -4   3   1  173.22    7.34 
   4   3  -1  171.76    7.48 
  -4   3   1  160.95    7.08 
  -4   3   1  172.26    7.47 
  -4   3   1  176.29    7.39 
   4   3  -1  165.72    7.48 
   4   3  -1  164.82    7.51 
  -4   3   1  172.45    7.68 
   3  -3  -1   69.03    3.38 
   3  -3  -1   71.83    3.22 
   3  -3  -1   70.11    3.21 
   3  -3  -1   69.04    3.14 
   3  -3  -1   68.83    3.20 
   3  -3  -1   69.08    3.40 
   3  -3  -1   63.62    3.19 
   3  -3  -1   69.27    3.20 
   3  -3  -1   66.81    3.19 
  -3   3   1   72.55    3.24 
  -3   3   1   64.19    3.05 
   3   3  -1   71.74    3.28 
   3   3  -1   72.09    2.87 
  -3   3   1   72.82    3.23 
  -3   3   1   69.38    3.29 
   3   3  -1   70.54    3.28 
  -3   3   1   68.50    3.20 
  -3   3   1   65.80    3.39 
  -3   3   1   68.07    3.22 
   3   3  -1   67.00    2.85 
   3   3  -1   68.03    3.27 
   3   3  -1   68.51    3.29 
   2  -3  -1   18.99    1.13 
   2  -3  -1   20.90    0.92 
   2  -3  -1   21.27    1.14 
   2  -3  -1   20.22    1.13 
   2  -3  -1   22.31    1.20 
   2  -3  -1   19.42    1.12 
   2  -3  -1   20.62    1.14 
   2  -3  -1   20.12    1.13 
   2  -3  -1   20.91    1.22 
   2  -3  -1   20.68    0.92 
   2  -3  -1   20.99    1.12 
   2  -3  -1   22.29    1.26 
   2  -3  -1   22.60    1.16 
   2  -3  -1   22.01    1.17 
  -2   3   1   19.30    1.12 
   2   3  -1   20.58    0.91 
  -2   3   1   19.82    1.14 
  -2   3   1   19.39    1.11 
   2   3  -1   20.31    0.92 
   2   3  -1   19.84    0.91 
  -2   3   1   20.89    1.22 
  -2   3   1   19.65    1.13 
   2   3  -1   19.52    1.12 
   2   3  -1   19.81    1.12 
   2   3  -1   18.66    1.10 
   2   3  -1   19.27    0.91 
   2   3  -1   18.51    0.91 
   2   3  -1   19.68    0.87 
  -2   3   1   19.59    1.06 
   2   3  -1   19.05    1.17 
   2   3  -1   20.30    0.87 
  -2   3   1   19.85    1.20 
   1  -3  -1   24.60    1.32 
   1  -3  -1   22.99    1.31 
   1  -3  -1   24.96    1.31 
  -1  -3   1   28.16    1.34 
  -1  -3   1   25.89    1.22 
  -1  -3   1   27.37    1.32 
   1  -3  -1   24.75    1.31 
  -1  -3   1   26.85    1.25 
  -1  -3   1   27.34    1.22 
  -1  -3   1   26.80    1.21 
   1  -3  -1   22.65    1.31 
   1  -3  -1   23.87    1.31 
   1  -3  -1   24.09    1.31 
   1  -3  -1   24.89    1.31 
   1  -3  -1   23.19    1.31 
   1  -3  -1   24.75    1.31 
   1  -3  -1   26.44    1.37 
   1  -3  -1   21.68    1.29 
  -1  -3   1   26.21    1.21 
  -1   3   1   21.95    1.30 
   1   3  -1   27.99    1.25 
   1   3  -1   27.29    1.21 
   1   3  -1   27.38    1.24 
  -1   3   1   23.71    1.31 
   1   3  -1   26.57    1.21 
   1   3  -1   26.67    1.22 
  -1   3   1   23.84    1.30 
   1   3  -1   27.47    1.22 
  -1   3   1   25.72    1.30 
  -1   3   1   25.37    1.38 
   1   3  -1   27.12    1.38 
  -1   3   1   24.75    1.31 
   1   3  -1   27.19    1.22 
   1   3  -1   27.96    1.22 
  -1   3   1   25.02    1.45 
   1   3  -1   26.89    1.16 
   1   3  -1   27.52    1.16 
  -1   3   1   24.77    1.34 
  -1   3   1   27.93    1.34 
   0  -3  -1   22.49    1.23 
   0  -3  -1   23.60    1.19 
   0  -3   1   23.86    1.19 
   0  -3  -1   22.79    1.21 
   0  -3  -1   23.92    1.19 
   0  -3  -1   23.83    1.19 
   0  -3   1   24.91    1.20 
   0  -3   1   24.23    1.24 
   0  -3   1   22.69    1.19 
   0  -3  -1   24.72    1.12 
   0  -3  -1   23.18    1.19 
   0  -3   1   23.24    1.18 
   0  -3   1   24.50    1.11 
   0  -3   1   24.53    1.22 
   0  -3  -1   22.16    1.18 
   0  -3   1   23.02    1.15 
   0  -3  -1   23.62    1.19 
   0  -3   1   23.65    1.18 
   0  -3  -1   21.76    1.17 
   0  -3  -1   24.28    1.08 
   0  -3   1   23.55    1.19 
   0  -3   1   20.24    1.18 
   0  -3  -1   23.08    1.18 
   0  -3   1   22.45    1.18 
   0  -3  -1   24.21    1.10 
   0   3  -1   24.62    1.22 
   0   3  -1   24.19    1.19 
   0   3   1   24.05    1.14 
   0   3  -1   24.09    1.23 
   0   3   1   22.41    1.18 
   0   3  -1   25.31    1.13 
   0   3   1   23.38    1.10 
   0   3   1   22.54    1.18 
   0   3  -1   25.70    1.18 
   0   3  -1   25.63    1.11 
   0   3   1   22.26    1.19 
   0   3   1   24.63    1.09 
   0   3   1   23.58    1.18 
   0   3   1   23.71    1.22 
   0   3   1   22.93    1.18 
   0   3   1   24.07    1.20 
   0   3  -1   23.95    1.18 
   0   3   1   21.82    1.09 
   0   3   1   24.05    1.18 
   0   3  -1   25.18    1.19 
   0   3  -1   25.40    1.20 
   0   3   1   22.06    1.21 
   0   3   1   23.51    1.18 
   0   3  -1   22.54    1.21 
   0   3   1   24.35    1.19 
   0   3  -1   23.82    1.19 
   0   3  -1   23.94    1.19 
   0   3  -1   23.88    1.18 
  -1  -3  -1    3.16    0.24 
  -1  -3  -1    3.24    0.30 
   1  -3   1    3.58    0.40 
   1  -3   1    2.47    0.34 
   1  -3   1    3.43    0.39 
   1  -3   1    3.54    0.37 
   1  -3   1    4.26    0.39 
   1  -3   1    3.85    0.43 
  -1  -3  -1    2.84    0.26 
   1  -3   1    3.42    0.40 
  -1  -3  -1    3.14    0.32 
  -1  -3  -1    2.99    0.23 
  -1  -3  -1    2.67    0.37 
  -1  -3  -1    2.75    0.30 
   1  -3   1    3.66    0.45 
   1  -3   1    3.51    0.38 
   1  -3   1    2.74    0.41 
  -1   3  -1    3.07    0.38 
  -1   3  -1    3.94    0.42 
  -1   3  -1    3.72    0.36 
  -1   3  -1    3.51    0.35 
  -1   3  -1    2.96    0.40 
   1   3   1    3.11    0.27 
   1   3   1    3.15    0.35 
   1   3   1    3.30    0.32 
   1   3   1    3.09    0.29 
  -1   3  -1    1.92    0.42 
   1   3   1    3.06    0.40 
  -1   3  -1    3.47    0.43 
  -1   3  -1    3.04    0.41 
   1   3   1    2.71    0.30 
   1   3   1    2.94    0.30 
   1   3   1    3.18    0.33 
   1   3   1    3.35    0.31 
   2  -3   1   19.98    1.16 
   2  -3   1   18.36    1.14 
  -2  -3  -1   21.37    1.22 
   2  -3   1   20.26    1.14 
   2  -3   1   18.36    1.14 
   2  -3   1   20.19    0.99 
  -2  -3  -1   22.14    1.19 
   2  -3   1   19.93    1.25 
   2  -3   1   19.91    1.13 
   2  -3   1   21.06    1.17 
   2  -3   1   20.28    1.23 
   2  -3   1   18.88    1.03 
   2  -3   1   18.47    1.14 
  -2   3  -1   19.34    1.16 
  -2   3  -1   20.19    1.21 
  -2   3  -1   20.62    1.23 
   2   3   1   20.20    1.00 
  -2   3  -1   18.65    1.12 
   2   3   1   20.78    1.00 
   2   3   1   21.97    1.22 
  -2   3  -1   20.49    1.05 
   2   3   1   21.17    1.00 
   2   3   1   21.59    1.04 
   2   3   1   20.22    1.07 
  -2   3  -1   19.31    1.16 
   2   3   1   20.58    1.07 
   2   3   1   20.64    0.99 
   2   3   1   20.65    1.01 
   2   3   1   20.28    1.00 
  -2   3  -1   20.12    1.15 
  -2   3  -1   19.17    1.10 
   3  -3   1   28.27    1.47 
   3  -3   1   27.48    1.37 
  -3  -3  -1   25.92    1.56 
   3  -3   1   28.57    1.67 
   3  -3   1   26.60    1.52 
   3  -3   1   28.73    1.49 
   3  -3   1   28.76    1.68 
   3  -3   1   29.73    1.54 
   3  -3   1   28.46    1.51 
   3  -3   1   26.39    1.49 
   3  -3   1   26.79    1.50 
   3   3   1   24.62    1.26 
   3   3   1   27.38    1.29 
   3   3   1   21.13    1.51 
  -3   3  -1   31.76    1.52 
  -3   3  -1   26.59    1.52 
  -3   3  -1   26.63    1.50 
   3   3   1   25.40    1.27 
   3   3   1   26.89    1.21 
  -3   3  -1   27.55    1.53 
   3   3   1   27.00    1.30 
  -3   3  -1   29.02    1.61 
   3   3   1   27.20    1.50 
   3   3   1   26.74    1.51 
  -3   3  -1   26.41    1.52 
  -3   3  -1   27.55    1.41 
   3   3   1   27.57    1.30 
   4  -3   1    5.44    0.73 
   4  -3   1    6.09    0.63 
   4  -3   1    5.62    0.65 
   4  -3   1    6.48    0.52 
   4  -3   1    5.35    0.63 
   4  -3   1    5.25    0.73 
   4  -3   1    6.39    0.58 
   4  -3   1    5.61    0.62 
   4  -3   1    6.14    0.65 
   4   3   1    5.37    0.44 
   4   3   1    5.74    0.40 
   4   3   1    5.17    0.66 
   4   3   1    6.31    0.41 
  -4   3  -1    6.91    0.54 
   4   3   1    5.56    0.43 
  -4   3  -1    6.70    0.65 
   4   3   1    4.97    0.65 
   4   3   1    4.67    0.66 
  -4   3  -1    4.48    0.66 
   4   3   1    5.47    0.43 
  -4   3  -1    4.96    0.66 
  -4   3  -1    6.25    0.66 
  -4   3  -1    6.82    0.68 
   5  -3   1    5.37    0.68 
   5  -3   1    4.14    0.49 
   5  -3   1    3.53    0.79 
   5  -3   1    2.90    0.57 
   5  -3   1    3.09    0.61 
   5  -3   1    3.62    0.81 
   5  -3   1    3.30    0.57 
   5  -3   1    2.94    0.61 
   5   3   1    4.26    0.35 
   5   3   1    3.70    0.70 
   5   3   1    4.14    0.39 
   5   3   1    2.79    0.61 
   5   3   1    4.06    0.42 
   5   3   1    2.80    0.37 
   5   3   1    3.84    0.33 
   5   3   1    3.80    0.70 
  -5   3  -1    3.46    0.42 
   6  -3   1    0.29    0.35 
   6  -3   1    0.03    0.29 
   6  -3   1    0.42    0.41 
  -6  -3  -1    0.52    0.53 
   6  -3   1    0.14    0.36 
   6  -3   1    0.64    0.46 
   6  -3   1    0.36    0.45 
   6  -3   1    0.60    0.48 
   6   3   1    0.33    0.26 
   6   3   1    0.22    0.23 
  -6   3  -1   -0.31    0.46 
   6   3   1    0.20    0.21 
   6   3   1    1.21    0.65 
   6   3   1    0.45    0.18 
   6   3   1    0.35    0.50 
   6   3   1   -0.27    0.48 
   6   3   1    0.27    0.16 
   7  -3   1   32.02    1.80 
   7  -3   1   31.61    1.99 
   7  -3   1   31.89    1.98 
   7  -3   1   32.27    2.41 
   7  -3   1   32.12    2.42 
   7   3   1   28.90    2.33 
   7   3   1   30.82    1.76 
   7   3   1   32.43    2.34 
   7   3   1   33.13    1.60 
  -7   3  -1   33.08    2.55 
   7   3   1   33.94    2.35 
   7   3   1   33.92    1.64 
   8  -3   1   14.79    1.69 
   8  -3   1   15.76    1.36 
   8  -3   1   17.50    1.39 
   8  -3   1   13.96    0.94 
   8  -3   1   16.28    1.87 
   8   3   1   14.67    0.89 
   8   3   1   15.77    1.70 
   8   3   1   15.99    1.69 
  -8   3  -1   12.07    1.71 
   8   3   1   15.91    1.80 
   8   3   1   15.08    0.88 
   9  -3   1   13.22    1.89 
   9  -3   1   15.36    1.98 
   9  -3   1   14.62    1.36 
   9  -3   1   15.06    1.41 
   9   3   1   19.24    1.95 
  -9   3  -1   12.26    1.84 
   9   3   1   13.76    1.75 
   9  -4  -1   12.21    1.26 
   9  -4  -1   13.78    1.90 
   9  -4  -1   14.12    1.35 
   9  -4  -1   15.76    1.99 
  -9   4   1   13.91    1.88 
   9   4  -1   12.16    1.65 
   9   4  -1   12.83    1.68 
   8  -4  -1   -0.17    0.33 
   8  -4  -1    0.18    0.50 
   8  -4  -1    0.85    0.70 
   8  -4  -1   -0.46    0.49 
   8  -4  -1    0.08    0.55 
   8   4  -1    0.33    0.27 
   8   4  -1   -0.39    0.65 
  -8   4   1   -0.06    0.76 
   8   4  -1    1.13    0.77 
   7  -4  -1   12.47    1.17 
   7  -4  -1   10.47    1.47 
   7  -4  -1   14.51    1.25 
   7  -4  -1   16.23    1.70 
   7   4  -1   16.48    1.55 
  -7   4   1   10.60    1.60 
   7   4  -1   10.67    1.27 
   7   4  -1   13.65    0.81 
   7   4  -1   11.23    1.38 
   6  -4  -1   79.98    4.23 
   6  -4  -1   74.27    3.73 
   6  -4  -1   72.09    4.12 
   6  -4  -1   76.73    3.73 
   6  -4  -1   77.19    3.67 
   6  -4  -1   72.44    3.74 
   6   4  -1   77.71    3.28 
   6   4  -1   74.14    3.96 
   6   4  -1   67.90    3.92 
  -6   4   1   73.98    4.21 
   6   4  -1   73.32    3.97 
   5  -4  -1   73.31    3.37 
   5  -4  -1   58.96    3.54 
   5  -4  -1   66.71    3.64 
   5  -4  -1   71.53    3.33 
   5  -4  -1   66.25    3.30 
   5  -4  -1   72.30    3.29 
   5  -4  -1   62.64    3.30 
  -5   4   1   64.11    3.66 
   5   4  -1   61.95    3.40 
   5   4  -1   63.96    3.44 
  -5   4   1   68.50    3.37 
   5   4  -1   67.52    2.86 
  -5   4   1   62.69    3.12 
  -5   4   1   68.38    3.61 
  -5   4   1   71.30    3.49 
   5   4  -1   64.16    3.48 
   4  -4  -1    0.75    0.32 
   4  -4  -1    1.18    0.38 
   4  -4  -1   -0.04    0.27 
   4  -4  -1    0.86    0.31 
   4  -4  -1    0.65    0.31 
   4  -4  -1    0.90    0.32 
   4  -4  -1    0.19    0.42 
   4  -4  -1    0.39    0.34 
   4  -4  -1    0.61    0.37 
  -4   4   1    0.73    0.30 
  -4   4   1    1.31    0.42 
  -4   4   1    0.85    0.38 
   4   4  -1    0.77    0.35 
   4   4  -1    0.60    0.36 
   4   4  -1    0.60    0.13 
  -4   4   1    0.94    0.34 
  -4   4   1    0.51    0.36 
  -4   4   1    0.43    0.40 
  -4   4   1    0.87    0.35 
   4   4  -1    0.40    0.37 
   3  -4  -1   12.96    0.94 
   3  -4  -1   13.43    0.94 
   3  -4  -1   11.23    0.86 
   3  -4  -1   12.84    0.91 
   3  -4  -1    9.65    0.88 
   3  -4  -1   13.29    0.96 
   3  -4  -1   13.24    0.92 
   3  -4  -1   13.14    0.91 
   3  -4  -1   10.83    1.02 
   3  -4  -1   10.31    1.01 
  -3   4   1   12.72    0.94 
  -3   4   1   13.60    0.95 
   3   4  -1   13.19    0.59 
   3   4  -1   13.82    0.61 
   3   4  -1   13.01    0.63 
  -3   4   1   12.24    0.90 
   3   4  -1   12.87    0.61 
   3   4  -1   13.86    0.96 
   3   4  -1   13.78    0.64 
   3   4  -1   12.36    0.92 
  -3   4   1   12.82    0.86 
  -3   4   1   11.62    0.96 
  -3   4   1   12.45    1.02 
  -3   4   1   12.02    0.94 
   3   4  -1   13.83    0.95 
   2  -4  -1  181.47    8.00 
   2  -4  -1  178.53    7.98 
   2  -4  -1  175.24    7.96 
   2  -4  -1  185.64    8.06 
   2  -4  -1  190.08    7.85 
  -2  -4   1  179.46    7.97 
   2  -4  -1  186.25    8.06 
   2  -4  -1  193.97    8.00 
   2  -4  -1  182.55    8.05 
   2  -4  -1  177.76    7.97 
   2  -4  -1  184.44    7.99 
   2  -4  -1  191.66    7.98 
   2  -4  -1  185.59    8.00 
  -2  -4   1  186.62    7.97 
   2  -4  -1  179.60    7.97 
   2   4  -1  188.68    7.75 
  -2   4   1  192.38    8.00 
   2   4  -1  185.48    7.78 
   2   4  -1  188.12    7.73 
   2   4  -1  185.31    7.75 
  -2   4   1  197.64    8.09 
   2   4  -1  179.46    7.74 
  -2   4   1  183.03    8.00 
  -2   4   1  183.63    7.98 
   2   4  -1  186.15    7.75 
  -2   4   1  185.44    7.94 
  -2   4   1  191.77    8.02 
   2   4  -1  184.29    7.92 
  -2   4   1  186.93    8.08 
   2   4  -1  187.53    7.73 
   1  -4  -1    2.57    0.42 
   1  -4  -1    3.23    0.44 
   1  -4  -1    3.35    0.40 
   1  -4  -1    2.83    0.38 
   1  -4  -1    3.36    0.40 
   1  -4  -1    2.67    0.38 
   1  -4  -1    2.86    0.37 
  -1  -4   1    2.07    0.32 
  -1  -4   1    3.49    0.33 
   1  -4  -1    2.00    0.42 
   1  -4  -1    2.14    0.42 
  -1  -4   1    3.57    0.41 
   1  -4  -1    3.13    0.44 
  -1  -4   1    2.48    0.31 
   1  -4  -1    2.56    0.40 
   1  -4  -1    3.62    0.41 
  -1  -4   1    2.67    0.37 
  -1  -4   1    2.88    0.33 
  -1  -4   1    2.24    0.31 
  -1  -4   1    1.99    0.46 
  -1   4   1    2.53    0.37 
   1   4  -1    2.95    0.35 
  -1   4   1    2.44    0.46 
   1   4  -1    2.55    0.30 
   1   4  -1    3.35    0.35 
   1   4  -1    3.11    0.29 
  -1   4   1    2.60    0.38 
  -1   4   1    2.59    0.36 
   1   4  -1    3.22    0.46 
   1   4  -1    2.69    0.29 
   1   4  -1    2.59    0.32 
  -1   4   1    2.73    0.41 
  -1   4   1    2.20    0.36 
  -1   4   1    3.36    0.42 
   1   4  -1    2.93    0.32 
   1   4  -1    3.36    0.34 
   1   4  -1    2.81    0.32 
  -1   4   1    2.54    0.41 
   1   4  -1    2.53    0.31 
   0  -4   1  123.50    5.41 
   0  -4   1  128.74    5.41 
   0  -4  -1  128.04    5.30 
   0  -4  -1  122.85    5.27 
   0  -4  -1  125.43    5.29 
   0  -4  -1  127.06    5.42 
   0  -4  -1  120.36    5.38 
   0  -4   1  134.20    5.44 
   0  -4   1  127.59    5.40 
   0  -4  -1  130.92    5.51 
   0  -4   1  126.43    5.41 
   0  -4   1  116.79    5.32 
   0  -4   1  124.11    5.41 
   0  -4   1  118.44    5.45 
   0  -4  -1  121.09    5.40 
   0  -4   1  132.66    5.31 
   0   4  -1  127.49    5.38 
   0   4   1  118.02    5.39 
   0   4   1  121.80    5.27 
   0   4   1  130.20    5.42 
   0   4  -1  122.69    5.44 
   0   4  -1  119.91    5.29 
   0   4  -1  127.34    5.47 
   0   4   1  124.82    5.40 
   0   4  -1  122.88    5.40 
   0   4   1  131.68    5.41 
   0   4   1  122.71    5.39 
   0   4  -1  120.88    5.38 
   0   4  -1  126.86    5.41 
   0   4   1  124.47    5.28 
   0   4   1  124.21    5.32 
   0   4   1  125.10    5.40 
   0   4   1  119.69    5.45 
   0   4  -1  126.44    5.40 
   0   4  -1  128.70    5.41 
   0   4   1  129.42    5.40 
   0   4   1  124.47    5.40 
   0   4  -1  126.47    5.40 
   0   4  -1  126.49    5.39 
   0   4   1  121.75    5.30 
   0   4  -1  115.79    5.33 
   0   4  -1  123.04    5.30 
   0   4   1  128.43    5.46 
   0   4   1  126.09    5.39 
  -1  -4  -1  228.17    9.11 
   1  -4   1  208.54    9.32 
   1  -4   1  208.65    9.26 
  -1  -4  -1  210.34    9.36 
   1  -4   1  217.52    9.32 
   1  -4   1  215.33    9.30 
  -1  -4  -1  221.17    9.22 
  -1  -4  -1  219.09    9.20 
   1  -4   1  210.66    9.30 
   1  -4   1  211.37    9.33 
   1  -4   1  219.34    9.33 
  -1  -4  -1  221.27    9.07 
   1  -4   1  212.43    9.32 
  -1  -4  -1  229.68    9.14 
   1  -4   1  210.09    9.31 
  -1  -4  -1  214.04    9.20 
   1  -4   1  240.13    9.34 
   1   4   1  223.84    9.26 
  -1   4  -1  214.87    9.30 
   1   4   1  219.99    9.21 
  -1   4  -1  215.50    9.38 
   1   4   1  218.74    9.21 
  -1   4  -1  219.83    9.29 
   1   4   1  220.97    9.17 
   1   4   1  221.25    9.20 
   1   4   1  226.58    9.17 
  -1   4  -1  229.64    9.28 
   1   4   1  228.99    9.33 
  -1   4  -1  215.42    9.31 
  -1   4  -1  214.08    9.31 
   1   4   1  221.00    9.20 
   1   4   1  215.32    9.21 
  -1   4  -1  221.51    9.31 
   1   4   1  218.93    9.40 
   1   4   1  217.66    9.20 
  -2  -4  -1   74.27    3.50 
   2  -4   1   75.26    3.43 
   2  -4   1   72.20    3.50 
   2  -4   1   73.83    3.45 
   2  -4   1   76.57    3.45 
   2  -4   1   75.36    3.33 
  -2  -4  -1   71.84    3.25 
   2  -4   1   72.29    3.44 
  -2  -4  -1   72.53    3.25 
   2  -4   1   75.76    3.43 
   2  -4   1   74.47    3.52 
   2  -4   1   76.65    3.45 
   2  -4   1   75.49    3.44 
   2  -4   1   73.07    3.31 
   2   4   1   76.72    3.24 
   2   4   1   76.08    3.27 
   2   4   1   73.68    3.21 
  -2   4  -1   69.60    3.42 
  -2   4  -1   69.88    3.41 
   2   4   1   72.70    3.27 
   2   4   1   74.93    3.24 
   2   4   1   71.84    3.26 
  -2   4  -1   72.48    3.38 
  -2   4  -1   73.67    3.43 
   2   4   1   72.69    3.23 
  -2   4  -1   75.06    3.53 
  -2   4  -1   76.04    3.45 
   2   4   1   75.60    3.25 
  -2   4  -1   69.52    3.44 
   2   4   1   73.21    3.45 
   2   4   1   75.82    3.23 
   3  -4   1   75.68    3.45 
   3  -4   1   72.75    3.44 
   3  -4   1   73.15    3.40 
   3  -4   1   72.19    3.41 
  -3  -4  -1   72.79    3.53 
   3  -4   1   77.87    3.47 
   3  -4   1   71.85    3.46 
   3  -4   1   70.85    3.58 
   3  -4   1   74.79    3.46 
   3  -4   1   75.55    3.30 
   3  -4   1   76.71    3.63 
  -3   4  -1   69.62    3.36 
  -3   4  -1   72.70    3.54 
   3   4   1   71.56    3.19 
   3   4   1   70.01    3.33 
   3   4   1   70.72    3.34 
   3   4   1   68.36    3.49 
   3   4   1   73.37    3.10 
   3   4   1   71.13    3.15 
  -3   4  -1   78.32    3.48 
  -3   4  -1   76.01    3.61 
   3   4   1   71.53    3.08 
  -3   4  -1   71.36    3.44 
  -3   4  -1   71.60    3.46 
   3   4   1   72.43    3.18 
   3   4   1   67.85    3.13 
  -3   4  -1   72.21    3.43 
   3   4   1   69.10    3.16 
   3   4   1   71.63    3.17 
   4  -4   1    5.21    0.63 
   4  -4   1    5.39    0.60 
   4  -4   1    4.87    0.64 
   4  -4   1    5.58    0.67 
   4  -4   1    4.00    0.67 
   4  -4   1    4.04    0.67 
   4  -4   1    5.43    0.66 
   4  -4   1    4.97    0.62 
  -4  -4  -1    3.66    0.67 
   4  -4   1    4.96    0.59 
   4  -4   1    4.97    0.50 
   4   4   1    5.28    0.38 
  -4   4  -1    6.57    0.71 
  -4   4  -1    5.02    0.64 
  -4   4  -1    3.41    0.74 
   4   4   1    4.87    0.43 
  -4   4  -1    4.37    0.66 
  -4   4  -1    4.82    0.63 
  -4   4  -1    5.95    0.68 
   4   4   1    4.84    0.62 
   4   4   1    4.09    0.59 
   4   4   1    3.88    0.61 
   4   4   1    5.07    0.41 
  -4   4  -1    4.56    0.57 
   4   4   1    5.05    0.39 
   4   4   1    5.54    0.38 
   5  -4   1   51.10    2.70 
   5  -4   1   47.50    2.68 
  -5  -4  -1   53.41    2.87 
   5  -4   1   48.98    2.96 
   5  -4   1   53.45    2.72 
   5  -4   1   52.11    2.72 
   5  -4   1   53.85    2.49 
   5  -4   1   46.42    2.64 
   5  -4   1   49.19    2.98 
  -5   4  -1   49.64    3.04 
   5   4   1   45.14    2.83 
   5   4   1   53.71    2.81 
   5   4   1   48.20    2.73 
   5   4   1   51.24    2.38 
  -5   4  -1   52.14    2.59 
   5   4   1   51.10    2.29 
   5   4   1   52.10    2.30 
   5   4   1   51.93    2.22 
   5   4   1   52.60    2.22 
   6  -4   1   26.97    2.06 
   6  -4   1   27.25    1.74 
   6  -4   1   23.34    1.70 
   6  -4   1   28.46    1.67 
   6  -4   1   30.21    1.83 
  -6  -4  -1   27.11    1.89 
   6  -4   1   27.66    2.06 
   6   4   1   25.12    1.93 
  -6   4  -1   23.31    2.00 
   6   4   1   27.39    1.30 
   6   4   1   27.50    1.45 
   6   4   1   25.94    1.89 
   6   4   1   27.08    1.90 
   6   4   1   26.40    1.31 
   7  -4   1    3.33    0.94 
  -7  -4  -1    3.36    0.84 
   7  -4   1    2.69    0.73 
   7  -4   1    2.76    0.88 
   7  -4   1    2.99    0.78 
   7   4   1    3.07    0.97 
   7   4   1    3.38    0.93 
   7   4   1    2.62    0.31 
   7   4   1    1.95    0.77 
  -7   4  -1    3.37    1.23 
   7   4   1    2.64    0.32 
   7   4   1    2.22    0.48 
   8  -4   1    0.41    0.56 
   8  -4   1    1.08    0.76 
   8  -4   1    1.31    0.78 
   8  -4   1    0.82    0.58 
  -8   4  -1    2.04    1.23 
   8   4   1    0.98    0.70 
   8   4   1    0.61    0.75 
   8   4   1    1.32    0.91 
   9  -4   1    4.04    1.26 
   9  -4   1    3.00    0.83 
   9  -4   1    3.45    0.38 
   9  -4   1    3.85    0.88 
   9  -4   1    5.14    1.20 
  -9   4  -1    3.09    1.26 
   9   4   1    3.71    1.13 
   9   4   1    4.96    1.28 
   9  -5  -1    6.34    0.66 
   9  -5  -1    5.83    0.99 
   9  -5  -1    6.45    1.04 
   9  -5  -1    3.74    1.15 
   9  -5  -1    5.92    1.30 
   9   5  -1    6.64    1.30 
   9   5  -1    5.43    1.35 
  -9   5   1    6.47    1.42 
   8  -5  -1   31.56    2.77 
   8  -5  -1   37.42    2.36 
   8  -5  -1   32.90    2.79 
   8  -5  -1   34.61    2.28 
   8  -5  -1   33.63    2.01 
   8   5  -1   30.56    2.48 
   8   5  -1   38.92    2.67 
  -8   5   1   41.79    3.11 
   8   5  -1   37.69    2.61 
   8   5  -1   37.39    1.76 
   7  -5  -1   47.31    3.19 
   7  -5  -1   47.10    2.75 
  -7  -5   1   50.73    3.10 
   7  -5  -1   47.73    2.77 
   7  -5  -1   52.08    3.33 
   7   5  -1   45.11    2.96 
   7   5  -1   45.48    2.97 
   7   5  -1   50.39    2.22 
   7   5  -1   47.64    2.98 
  -7   5   1   45.34    3.20 
   6  -5  -1    0.36    0.45 
   6  -5  -1    0.84    0.50 
   6  -5  -1    0.33    0.46 
   6  -5  -1    0.08    0.35 
   6  -5  -1    0.08    0.47 
   6   5  -1    1.17    0.65 
  -6   5   1    0.62    0.61 
   6   5  -1    0.76    0.59 
   6   5  -1    0.62    0.18 
   6   5  -1    0.58    0.52 
   5  -5  -1   61.91    3.14 
   5  -5  -1   58.84    2.99 
   5  -5  -1   64.98    3.52 
   5  -5  -1   60.37    3.14 
   5  -5  -1   61.74    3.18 
   5  -5  -1   65.17    3.10 
   5  -5  -1   63.11    3.17 
   5  -5  -1   57.22    3.38 
  -5   5   1   59.11    3.45 
   5   5  -1   63.73    3.24 
  -5   5   1   59.33    3.03 
   5   5  -1   58.84    3.21 
   5   5  -1   58.51    3.24 
  -5   5   1   60.89    3.23 
   4  -5  -1   57.35    3.15 
   4  -5  -1   51.52    3.05 
   4  -5  -1   58.42    2.86 
   4  -5  -1   56.11    2.94 
   4  -5  -1   55.57    2.91 
   4  -5  -1   55.83    2.92 
   4  -5  -1   56.00    2.86 
   4  -5  -1   57.04    2.91 
   4  -5  -1   57.31    2.93 
  -4   5   1   55.20    2.94 
   4   5  -1   59.42    2.95 
  -4   5   1   55.19    3.04 
  -4   5   1   55.73    2.94 
   4   5  -1   61.84    2.97 
  -4   5   1   58.17    2.91 
   4   5  -1   60.10    2.45 
  -4   5   1   53.28    2.81 
   4   5  -1   58.49    2.46 
  -4   5   1   57.12    2.94 
  -4   5   1   57.53    3.15 
   4   5  -1   62.32    2.99 
   3  -5  -1   28.01    1.27 
   3  -5  -1   30.37    1.69 
   3  -5  -1   29.88    1.64 
   3  -5  -1   28.34    1.67 
   3  -5  -1   27.74    1.77 
   3  -5  -1   28.15    1.77 
   3  -5  -1   29.59    1.28 
   3  -5  -1   29.72    1.65 
   3  -5  -1   30.08    1.66 
   3  -5  -1   30.21    1.71 
   3  -5  -1   30.25    1.64 
   3  -5  -1   30.05    1.66 
  -3   5   1   28.71    1.64 
  -3   5   1   26.96    1.64 
  -3   5   1   26.09    1.74 
   3   5  -1   27.60    1.34 
   3   5  -1   29.32    1.32 
   3   5  -1   28.60    1.33 
  -3   5   1   26.13    1.62 
  -3   5   1   24.38    1.70 
   3   5  -1   28.13    1.24 
   3   5  -1   27.31    1.23 
  -3   5   1   27.67    1.68 
   3   5  -1   28.32    1.34 
  -3   5   1   28.33    1.60 
   3   5  -1   28.39    1.33 
   3   5  -1   28.21    1.62 
  -2  -5   1    3.75    0.55 
   2  -5  -1    2.62    0.42 
   2  -5  -1    2.37    0.47 
  -2  -5   1    4.22    0.46 
   2  -5  -1    3.17    0.43 
   2  -5  -1    3.40    0.47 
   2  -5  -1    3.28    0.53 
   2  -5  -1    2.90    0.44 
   2  -5  -1    4.37    0.47 
   2  -5  -1    3.33    0.51 
   2  -5  -1    2.63    0.50 
   2  -5  -1    3.15    0.53 
   2  -5  -1    2.57    0.46 
   2  -5  -1    3.37    0.53 
  -2  -5   1    3.23    0.43 
   2   5  -1    3.31    0.32 
  -2   5   1    3.28    0.46 
  -2   5   1    3.13    0.46 
   2   5  -1    3.09    0.32 
   2   5  -1    2.65    0.32 
  -2   5   1    2.76    0.45 
   2   5  -1    3.41    0.41 
   2   5  -1    2.96    0.33 
   2   5  -1    3.45    0.38 
  -2   5   1    2.96    0.45 
   2   5  -1    3.50    0.35 
  -2   5   1    3.15    0.45 
  -2   5   1    3.74    0.52 
   2   5  -1    3.31    0.35 
  -2   5   1    3.27    0.53 
   1  -5  -1  102.43    4.49 
   1  -5  -1   99.60    4.48 
   1  -5  -1   95.89    4.46 
   1  -5  -1   99.30    4.50 
  -1  -5   1   97.36    4.33 
   1  -5  -1   96.59    4.45 
  -1  -5   1   96.58    4.41 
   1  -5  -1   97.53    4.40 
  -1  -5   1  100.12    4.36 
  -1  -5   1  100.99    4.58 
  -1  -5   1   99.90    4.40 
  -1  -5   1   95.36    4.34 
  -1  -5   1   98.81    4.36 
   1  -5  -1  101.67    4.43 
   1   5  -1   96.48    4.33 
  -1   5   1   98.26    4.46 
  -1   5   1   95.72    4.44 
   1   5  -1   96.64    4.34 
   1   5  -1   99.16    4.34 
   1   5  -1   97.56    4.33 
   1   5  -1  101.28    4.35 
  -1   5   1  103.52    4.44 
   1   5  -1   98.79    4.29 
   1   5  -1   98.51    4.33 
   1   5  -1   97.35    4.30 
   1   5  -1   98.68    4.53 
  -1   5   1  101.30    4.47 
   1   5  -1  100.84    4.35 
  -1   5   1  102.85    4.51 
  -1   5   1  101.23    4.45 
   1   5  -1   95.64    4.38 
  -1   5   1  101.67    4.55 
  -1   5   1  101.78    4.48 
   0  -5  -1   88.16    3.95 
   0  -5   1   81.90    3.82 
   0  -5  -1   89.46    3.70 
   0  -5   1   82.44    3.81 
   0  -5   1   80.16    3.82 
   0  -5  -1   84.49    3.71 
   0  -5   1   75.62    3.78 
   0  -5  -1   87.68    3.86 
   0  -5   1   93.13    3.95 
   0  -5  -1   88.29    3.86 
   0  -5   1   91.04    3.75 
   0  -5  -1   81.17    3.81 
   0  -5   1   82.10    3.83 
   0  -5   1   80.60    3.82 
   0   5   1   82.74    3.73 
   0   5   1   83.20    3.81 
   0   5  -1   82.93    3.80 
   0   5   1   83.04    3.88 
   0   5   1   90.34    3.84 
   0   5  -1   82.32    3.70 
   0   5  -1   80.36    3.81 
   0   5  -1   79.66    3.80 
   0   5   1   85.98    3.71 
   0   5  -1   86.29    3.90 
   0   5  -1   81.87    3.64 
   0   5   1   85.03    3.83 
   0   5   1   91.63    3.86 
   0   5   1   85.79    3.67 
   0   5   1   83.48    3.72 
   0   5  -1   87.02    3.76 
   0   5   1   89.50    3.83 
   0   5  -1   80.16    3.88 
   0   5   1   88.20    3.93 
   0   5   1   90.45    3.85 
   0   5   1   86.18    3.84 
   0   5   1   82.01    3.82 
   0   5  -1   82.38    3.82 
   0   5  -1   85.80    3.73 
   0   5  -1   79.08    3.79 
   0   5   1   89.65    3.84 
   0   5   1   88.21    3.62 
   0   5  -1   87.77    3.84 
   0   5  -1   85.14    3.84 
   0   5  -1   84.99    3.82 
   1  -5   1   45.40    2.25 
   1  -5   1   46.86    2.27 
   1  -5   1   45.35    2.26 
   1  -5   1   46.95    2.28 
  -1  -5  -1   47.91    2.34 
  -1  -5  -1   46.05    2.02 
  -1  -5  -1   46.16    2.05 
  -1  -5  -1   42.50    2.14 
   1  -5   1   43.34    2.24 
  -1  -5  -1   42.79    2.14 
  -1  -5  -1   43.32    1.95 
   1  -5   1   50.00    2.27 
   1  -5   1   45.81    2.26 
  -1  -5  -1   45.28    2.14 
  -1   5  -1   45.40    2.25 
   1   5   1   41.34    2.12 
   1   5   1   43.63    2.19 
   1   5   1   44.16    2.13 
   1   5   1   45.47    2.34 
  -1   5  -1   47.29    2.19 
   1   5   1   42.00    2.14 
  -1   5  -1   42.32    2.21 
  -1   5  -1   45.90    2.22 
  -1   5  -1   46.54    2.26 
   1   5   1   46.62    2.11 
   1   5   1   45.33    2.24 
   1   5   1   44.90    2.14 
   1   5   1   43.50    2.03 
   1   5   1   48.14    2.01 
   1   5   1   43.19    2.10 
  -1   5  -1   46.33    2.34 
   1   5   1   43.94    2.15 
   1   5   1   42.54    2.13 
  -1   5  -1   46.59    2.27 
   2  -5   1    5.04    0.63 
   2  -5   1    5.33    0.60 
   2  -5   1    5.37    0.67 
  -2  -5  -1    6.96    0.53 
   2  -5   1    5.83    0.66 
  -2  -5  -1    6.06    0.67 
  -2  -5  -1    6.81    0.48 
  -2  -5  -1    6.56    0.51 
   2  -5   1    5.28    0.66 
  -2  -5  -1    6.57    0.50 
  -2  -5  -1    6.42    0.50 
   2  -5   1    5.59    0.68 
   2  -5   1    5.82    0.59 
  -2  -5  -1    6.28    0.54 
   2  -5   1    5.08    0.58 
   2  -5   1    5.61    0.68 
   2  -5   1    6.61    0.60 
   2   5   1    7.00    0.54 
   2   5   1    7.14    0.34 
  -2   5  -1    5.53    0.61 
  -2   5  -1    7.30    0.71 
  -2   5  -1    6.09    0.62 
   2   5   1    6.14    0.52 
   2   5   1    8.06    0.55 
  -2   5  -1    6.16    0.69 
   2   5   1    6.21    0.50 
   2   5   1    6.79    0.56 
   2   5   1    7.10    0.50 
   2   5   1    7.01    0.67 
   2   5   1    7.76    0.54 
   2   5   1    7.36    0.34 
  -2   5  -1    5.99    0.64 
  -2   5  -1    6.18    0.66 
  -2   5  -1    5.68    0.62 
   3  -5   1    2.02    0.57 
   3  -5   1    1.66    0.47 
   3  -5   1    1.54    0.43 
   3  -5   1    1.81    0.51 
  -3  -5  -1    1.42    0.44 
   3  -5   1    2.17    0.52 
   3  -5   1    2.70    0.41 
   3  -5   1    2.36    0.56 
   3  -5   1    1.98    0.46 
   3  -5   1    1.84    0.26 
   3  -5   1    2.08    0.45 
   3  -5   1    1.36    0.41 
   3   5   1    1.27    0.35 
   3   5   1    2.42    0.32 
   3   5   1    1.92    0.31 
   3   5   1    2.38    0.33 
  -3   5  -1    1.73    0.46 
  -3   5  -1    1.81    0.48 
  -3   5  -1    1.71    0.46 
   3   5   1    2.03    0.26 
   3   5   1    1.87    0.29 
   3   5   1    2.62    0.53 
  -3   5  -1    1.45    0.47 
  -3   5  -1    1.67    0.50 
   3   5   1    1.86    0.31 
  -3   5  -1    2.48    0.45 
  -3   5  -1    2.28    0.58 
   3   5   1    2.27    0.39 
   3   5   1    2.01    0.28 
   4  -5   1   66.67    3.14 
   4  -5   1   54.90    3.41 
   4  -5   1   62.25    3.31 
   4  -5   1   66.38    3.34 
  -4  -5  -1   66.03    3.45 
   4  -5   1   65.93    3.26 
   4  -5   1   71.71    3.38 
   4  -5   1   67.66    3.35 
   4  -5   1   67.56    3.35 
   4  -5   1   67.72    3.28 
   4  -5   1   68.60    3.58 
  -4   5  -1   65.78    3.32 
   4   5   1   67.70    2.94 
  -4   5  -1   65.42    3.36 
  -4   5  -1   69.54    3.49 
  -4   5  -1   66.15    3.27 
   4   5   1   62.59    3.40 
  -4   5  -1   63.95    3.49 
   4   5   1   69.20    3.26 
   4   5   1   65.65    2.97 
   4   5   1   64.86    3.24 
  -4   5  -1   68.31    3.36 
  -4   5  -1   65.24    3.36 
   4   5   1   71.90    2.95 
   4   5   1   67.33    2.91 
   5  -5   1   11.53    1.22 
   5  -5   1   12.78    1.14 
   5  -5   1   11.09    1.20 
   5  -5   1   14.65    0.95 
   5  -5   1   11.02    1.05 
   5  -5   1   10.74    1.08 
   5  -5   1   11.73    1.00 
  -5  -5  -1   13.17    1.23 
   5  -5   1   12.43    1.11 
   5  -5   1   11.52    1.11 
   5   5   1   12.78    0.80 
  -5   5  -1   10.60    1.02 
   5   5   1   13.69    0.64 
  -5   5  -1   12.84    1.36 
   5   5   1   12.23    0.63 
   5   5   1   13.20    1.10 
   5   5   1   12.23    1.15 
   5   5   1   13.10    1.11 
   5   5   1   13.55    0.74 
   5   5   1   12.61    0.71 
  -6  -5  -1    0.04    0.46 
   6  -5   1    0.12    0.47 
   6  -5   1   -0.11    0.40 
   6  -5   1    0.07    0.62 
   6  -5   1    0.23    0.46 
   6  -5   1    0.62    0.46 
   6   5   1    0.74    0.28 
   6   5   1   -0.15    0.43 
   6   5   1    0.49    0.18 
  -6   5  -1    0.49    0.78 
   6   5   1    0.43    0.50 
   6   5   1    0.41    0.18 
   6   5   1    0.28    0.45 
   7  -5   1    1.30    0.62 
   7  -5   1    1.64    0.84 
   7  -5   1    1.00    0.86 
  -7  -5  -1    2.74    0.86 
   7  -5   1    0.71    0.57 
   7   5   1    3.52    1.02 
   7   5   1    2.24    0.78 
  -7   5  -1    1.84    0.90 
   7   5   1    2.64    0.47 
   7   5   1    2.59    0.76 
   8  -5   1   18.32    2.04 
   8  -5   1   22.09    1.70 
   8  -5   1   18.71    1.68 
   8  -5   1   19.55    2.11 
   8   5   1   23.58    1.99 
  -8   5  -1   16.75    2.11 
   8   5   1   18.52    1.85 
   8   5   1   18.08    1.77 
   9  -5   1    4.12    0.66 
   9  -5   1    4.29    1.40 
   9  -5   1    5.76    1.09 
   9  -5   1    5.56    1.53 
   9  -5   1    6.76    1.06 
   9   5   1    6.17    1.25 
  -9   5  -1    3.83    1.63 
   9   5   1    4.74    1.09 
   9  -6  -1    8.67    1.77 
   9  -6  -1   11.30    1.05 
   9  -6  -1   11.93    1.88 
   9  -6  -1   10.50    1.33 
   9  -6  -1   11.89    1.34 
   9   6  -1   12.15    1.61 
  -9   6   1   10.61    1.72 
   8  -6  -1    2.00    0.89 
   8  -6  -1    3.21    0.89 
   8  -6  -1    2.68    0.83 
   8  -6  -1    2.05    1.08 
   8   6  -1    3.66    1.01 
   8   6  -1    2.13    0.85 
   8   6  -1    3.56    1.08 
  -8   6   1    1.74    1.21 
   7  -6  -1   16.93    1.50 
   7  -6  -1   15.41    1.66 
   7  -6  -1   15.59    1.44 
  -7  -6   1   17.75    1.74 
   7  -6  -1   14.46    1.62 
   7   6  -1   13.49    1.48 
   7   6  -1   12.81    1.42 
   7   6  -1   13.90    1.46 
  -7   6   1   18.52    1.94 
  -6  -6   1   40.12    2.60 
   6  -6  -1   35.69    2.65 
   6  -6  -1   41.78    2.25 
   6  -6  -1   38.46    2.43 
   6  -6  -1   38.95    2.66 
   6  -6  -1   36.63    2.34 
   6   6  -1   38.14    2.48 
   6   6  -1   40.34    2.46 
  -6   6   1   36.76    2.69 
   6   6  -1   40.24    2.46 
   5  -6  -1   23.87    1.70 
   5  -6  -1   24.32    1.56 
   5  -6  -1   25.43    1.58 
   5  -6  -1   22.28    1.64 
   5  -6  -1   25.06    1.94 
   5  -6  -1   24.53    1.86 
  -5  -6   1   24.02    1.89 
   5   6  -1   23.10    1.69 
  -5   6   1   23.11    1.83 
   5   6  -1   25.43    1.68 
  -5   6   1   23.57    1.59 
   5   6  -1   24.85    1.04 
   4  -6  -1    1.32    0.48 
  -4  -6   1    0.44    0.50 
   4  -6  -1    0.86    0.37 
   4  -6  -1    0.27    0.38 
   4  -6  -1    0.64    0.42 
   4  -6  -1    0.71    0.48 
   4  -6  -1    0.35    0.34 
   4  -6  -1    0.08    0.39 
   4  -6  -1    0.53    0.40 
   4  -6  -1    0.84    0.39 
   4  -6  -1    0.49    0.36 
  -4   6   1    0.21    0.51 
  -4   6   1    0.23    0.44 
   4   6  -1    0.49    0.13 
  -4   6   1    1.04    0.42 
  -4   6   1    0.48    0.47 
   4   6  -1    0.29    0.14 
   4   6  -1    0.60    0.18 
   4   6  -1    0.68    0.41 
   4   6  -1    0.56    0.18 
  -4   6   1    0.52    0.43 
  -4   6   1   -0.02    0.35 
  -4   6   1    0.83    0.40 
   4   6  -1    0.37    0.14 
   3  -6  -1   57.96    2.87 
   3  -6  -1   57.50    2.90 
   3  -6  -1   56.49    2.60 
  -3  -6   1   54.19    2.79 
   3  -6  -1   53.44    2.95 
  -3  -6   1   58.25    3.07 
   3  -6  -1   57.84    2.85 
   3  -6  -1   55.46    2.90 
   3  -6  -1   56.92    2.82 
   3  -6  -1   56.34    2.97 
   3  -6  -1   56.60    2.86 
  -3  -6   1   52.97    2.79 
   3  -6  -1   52.89    2.85 
   3  -6  -1   55.44    2.86 
   3   6  -1   56.60    2.53 
   3   6  -1   52.69    2.76 
  -3   6   1   58.39    2.89 
   3   6  -1   54.70    2.54 
  -3   6   1   54.14    2.81 
   3   6  -1   58.47    2.53 
  -3   6   1   53.81    2.86 
   3   6  -1   56.98    2.53 
  -3   6   1   56.21    2.91 
   3   6  -1   56.82    2.46 
  -3   6   1   53.01    2.85 
  -3   6   1   54.42    2.93 
   3   6  -1   55.27    2.47 
   3   6  -1   57.07    2.52 
  -3   6   1   53.60    2.95 
  -2  -6   1   71.98    3.62 
  -2  -6   1   69.81    3.25 
  -2  -6   1   69.50    3.27 
   2  -6  -1   72.92    3.49 
   2  -6  -1   77.00    3.53 
   2  -6  -1   70.01    3.47 
  -2  -6   1   71.02    3.39 
  -2  -6   1   67.30    3.39 
   2  -6  -1   76.59    3.53 
   2  -6  -1   68.88    3.48 
   2  -6  -1   73.64    3.48 
   2  -6  -1   74.11    3.52 
   2   6  -1   71.54    3.05 
   2   6  -1   72.56    3.36 
  -2   6   1   70.00    3.47 
   2   6  -1   71.60    3.25 
  -2   6   1   77.43    3.52 
   2   6  -1   71.24    3.05 
  -2   6   1   72.42    3.48 
   2   6  -1   72.27    3.58 
   2   6  -1   73.30    3.24 
   2   6  -1   74.54    3.27 
  -2   6   1   75.81    3.52 
   2   6  -1   70.06    3.23 
  -2   6   1   71.06    3.59 
   2   6  -1   74.33    3.26 
   2   6  -1   69.97    3.24 
  -2   6   1   75.34    3.47 
  -2   6   1   74.02    3.52 
   2   6  -1   69.23    3.29 
  -1  -6   1   61.17    2.83 
   1  -6  -1   55.58    2.94 
   1  -6  -1   60.02    2.86 
   1  -6  -1   61.81    2.93 
  -1  -6   1   61.49    2.82 
  -1  -6   1   56.55    2.84 
  -1  -6   1   58.03    2.71 
   1  -6  -1   55.23    2.91 
   1  -6  -1   62.01    2.86 
  -1  -6   1   58.84    2.83 
  -1  -6   1   59.55    2.83 
   1  -6  -1   56.52    2.92 
  -1  -6   1   57.95    2.61 
  -1  -6   1   62.78    3.06 
  -1  -6   1   64.98    2.64 
  -1  -6   1   62.05    2.69 
   1  -6  -1   53.24    2.91 
  -1  -6   1   62.20    2.84 
   1   6  -1   58.79    2.81 
   1   6  -1   62.10    2.77 
  -1   6   1   61.75    2.92 
   1   6  -1   60.81    2.82 
   1   6  -1   61.26    2.78 
  -1   6   1   57.98    2.86 
   1   6  -1   60.30    2.88 
  -1   6   1   60.53    3.01 
   1   6  -1   58.90    2.80 
   1   6  -1   58.57    2.80 
  -1   6   1   59.90    2.89 
  -1   6   1   62.68    2.94 
   1   6  -1   63.61    2.81 
   1   6  -1   64.16    2.83 
   1   6  -1   61.24    3.00 
  -1   6   1   58.67    2.91 
  -1   6   1   58.66    2.93 
   1   6  -1   60.75    2.81 
  -1   6   1   58.00    2.95 
   0  -6   1   56.94    2.49 
   0  -6   1   51.20    2.60 
   0  -6  -1   52.20    2.61 
   0  -6   1   53.08    2.61 
   0  -6   1   49.25    2.68 
   0  -6  -1   50.43    2.69 
   0  -6   1   54.13    2.62 
   0  -6   1   48.60    2.57 
   0  -6   1   50.46    2.60 
   0  -6  -1   53.11    2.62 
   0  -6  -1   54.46    2.45 
   0  -6   1   47.96    2.54 
   0  -6  -1   52.98    2.62 
   0  -6  -1   53.28    2.48 
   0  -6  -1   54.59    2.61 
   0   6  -1   52.43    2.59 
   0   6   1   57.42    2.73 
   0   6   1   56.01    2.38 
   0   6   1   55.94    2.61 
   0   6  -1   52.86    2.45 
   0   6   1   56.21    2.62 
   0   6  -1   55.80    2.62 
   0   6  -1   50.06    2.65 
   0   6  -1   51.26    2.60 
   0   6   1   58.05    2.63 
   0   6  -1   49.65    2.57 
   0   6   1   56.68    2.63 
   0   6  -1   52.83    2.39 
   0   6  -1   53.69    2.59 
   0   6   1   55.86    2.62 
   0   6   1   59.23    2.64 
   0   6   1   56.67    2.62 
   0   6   1   52.27    2.46 
   0   6  -1   52.77    2.60 
   0   6   1   55.53    2.62 
   0   6  -1   50.88    2.59 
   0   6   1   54.52    2.68 
   0   6  -1   56.53    2.63 
   0   6   1   55.98    2.42 
   0   6  -1   53.64    2.70 
   0   6  -1   54.82    2.51 
   0   6   1   53.36    2.60 
   0   6  -1   51.01    2.48 
   1  -6   1    1.06    0.39 
  -1  -6  -1    1.41    0.42 
   1  -6   1    0.67    0.37 
   1  -6   1    1.05    0.36 
  -1  -6  -1    1.25    0.25 
  -1  -6  -1    0.76    0.29 
  -1  -6  -1    1.46    0.23 
   1  -6   1    1.34    0.40 
  -1  -6  -1    1.54    0.27 
  -1  -6  -1    0.65    0.28 
   1  -6   1    0.91    0.33 
   1  -6   1    1.06    0.40 
   1  -6   1    1.38    0.42 
  -1  -6  -1    0.85    0.32 
   1   6   1    1.20    0.36 
  -1   6  -1    0.67    0.35 
   1   6   1    1.27    0.35 
   1   6   1    1.79    0.42 
  -1   6  -1    1.16    0.36 
   1   6   1    1.64    0.35 
   1   6   1    0.95    0.32 
   1   6   1    1.53    0.27 
  -1   6  -1    1.12    0.42 
  -1   6  -1    1.22    0.39 
  -1   6  -1    0.63    0.32 
   1   6   1    0.86    0.33 
   1   6   1    1.34    0.41 
  -1   6  -1    1.79    0.42 
  -1   6  -1    0.90    0.33 
  -1   6  -1    0.99    0.32 
   1   6   1    1.08    0.32 
   1   6   1    0.93    0.30 
   1   6   1    1.33    0.31 
   1   6   1    1.35    0.34 
   1   6   1    1.47    0.23 
  -2  -6  -1   44.23    2.18 
   2  -6   1   50.48    2.48 
   2  -6   1   42.21    2.42 
  -2  -6  -1   46.34    2.23 
  -2  -6  -1   44.41    2.24 
  -2  -6  -1   44.20    2.21 
  -2  -6  -1   45.17    2.36 
   2  -6   1   46.45    2.44 
  -2  -6  -1   42.88    2.49 
  -2  -6  -1   46.39    2.13 
   2  -6   1   46.51    2.46 
   2  -6   1   48.80    2.38 
   2  -6   1   48.55    2.44 
   2  -6   1   48.32    2.45 
   2   6   1   47.88    2.25 
  -2   6  -1   45.47    2.40 
  -2   6  -1   44.23    2.38 
   2   6   1   43.50    2.38 
   2   6   1   45.87    2.23 
   2   6   1   47.68    2.21 
   2   6   1   45.30    2.21 
   2   6   1   45.73    2.22 
   2   6   1   50.11    2.31 
  -2   6  -1   47.17    2.42 
   2   6   1   48.15    2.10 
   2   6   1   49.02    2.08 
  -2   6  -1   49.51    2.47 
  -2   6  -1   47.24    2.44 
  -2   6  -1   46.82    2.54 
   2   6   1   46.05    2.22 
  -2   6  -1   43.13    2.40 
   3  -6   1   17.41    1.06 
   3  -6   1   16.52    1.23 
   3  -6   1   17.69    1.27 
   3  -6   1   16.05    1.22 
   3  -6   1   18.68    1.35 
   3  -6   1   19.59    1.31 
   3  -6   1   18.70    1.27 
   3  -6   1   19.39    1.27 
   3  -6   1   17.99    1.14 
  -3  -6  -1   17.82    1.38 
   3  -6   1   17.26    1.32 
   3  -6   1   15.68    1.22 
   3   6   1   18.31    1.00 
  -3   6  -1   18.87    1.33 
   3   6   1   17.07    1.01 
   3   6   1   18.44    1.02 
  -3   6  -1   15.94    1.37 
  -3   6  -1   14.97    1.27 
   3   6   1   19.09    1.30 
  -3   6  -1   18.80    1.32 
  -3   6  -1   15.45    1.25 
  -3   6  -1   17.98    1.30 
   3   6   1   16.59    1.04 
   3   6   1   17.80    1.01 
   3   6   1   17.87    1.02 
   3   6   1   19.03    0.97 
  -3   6  -1   17.98    1.25 
   4  -6   1    0.87    0.46 
   4  -6   1    0.54    0.40 
   4  -6   1    0.41    0.35 
   4  -6   1    1.06    0.52 
  -4  -6  -1   -0.17    0.43 
   4  -6   1    0.19    0.39 
   4  -6   1    0.19    0.30 
   4  -6   1    0.61    0.35 
   4  -6   1    0.82    0.50 
   4  -6   1    0.83    0.39 
   4  -6   1    0.43    0.50 
   4   6   1    0.20    0.30 
  -4   6  -1    0.66    0.49 
   4   6   1    0.45    0.12 
  -4   6  -1    0.26    0.41 
   4   6   1    0.15    0.21 
  -4   6  -1    0.27    0.43 
  -4   6  -1    0.71    0.46 
   4   6   1    0.29    0.24 
   4   6   1    0.37    0.23 
  -4   6  -1    0.17    0.47 
  -4   6  -1    0.66    0.48 
   4   6   1    0.62    0.13 
  -4   6  -1    0.76    0.40 
   4   6   1    0.47    0.20 
   4   6   1    0.29    0.30 
   4   6   1    0.60    0.38 
   4   6   1    0.86    0.25 
   5  -6   1   25.68    1.75 
   5  -6   1   22.71    1.86 
   5  -6   1   25.06    1.65 
   5  -6   1   26.15    1.99 
  -5  -6  -1   24.30    1.80 
   5  -6   1   25.59    1.52 
   5  -6   1   25.63    1.76 
   5  -6   1   23.72    1.74 
   5  -6   1   23.87    1.65 
   5   6   1   28.91    1.21 
   5   6   1   27.29    1.71 
   5   6   1   24.79    1.68 
   5   6   1   26.65    1.28 
   5   6   1   25.32    1.31 
  -5   6  -1   25.40    1.97 
   5   6   1   25.49    1.19 
  -5   6  -1   24.35    1.70 
   5   6   1   24.17    1.77 
   6  -6   1   29.23    1.93 
   6  -6   1   26.55    2.18 
  -6  -6  -1   26.30    2.03 
   6  -6   1   31.04    2.00 
   6  -6   1   25.28    2.10 
   6  -6   1   27.05    1.92 
  -6   6  -1   25.73    2.13 
   6   6   1   27.42    2.01 
   6   6   1   28.96    1.30 
  -6   6  -1   27.09    2.06 
   6   6   1   27.96    1.92 
   6   6   1   28.21    1.30 
   6   6   1   25.93    1.86 
   7  -6   1    5.16    0.99 
  -7  -6  -1    6.18    1.18 
   7  -6   1    3.41    1.14 
   7  -6   1    5.59    0.99 
   7  -6   1    4.81    1.02 
   7   6   1    5.90    1.04 
   7   6   1    5.15    0.97 
  -7   6  -1    5.35    1.45 
   7   6   1    5.23    1.08 
   8  -6   1    5.73    1.21 
   8  -6   1    5.24    1.12 
   8  -6   1    6.27    1.41 
   8  -6   1    6.37    1.18 
   8   6   1    5.41    1.09 
  -8   6  -1    4.19    1.23 
   8   6   1    6.36    1.14 
   8   6   1    7.46    1.19 
   9  -6   1    8.89    1.72 
   9  -6   1    7.69    1.23 
   9  -6   1   10.10    1.73 
   9  -6   1    7.99    0.94 
   9  -6   1    8.84    1.29 
   9   6   1    8.68    1.52 
  -9   6  -1    5.25    1.70 
   9  -7  -1    4.85    1.44 
   9  -7  -1    5.36    0.89 
   9  -7  -1    4.23    1.30 
   9  -7  -1    7.30    1.17 
   9  -7  -1    7.24    1.16 
  -9   7   1    4.18    1.52 
   8  -7  -1   27.54    2.13 
   8  -7  -1   27.41    2.56 
   8  -7  -1   29.64    2.15 
  -8  -7   1   29.44    2.55 
   8  -7  -1   26.92    2.45 
   8   7  -1   24.35    2.24 
  -8   7   1   27.97    2.53 
   8   7  -1   27.90    2.24 
   7  -7  -1   28.19    2.42 
  -7  -7   1   33.76    2.53 
   7  -7  -1   32.42    2.25 
   7  -7  -1   31.01    2.56 
   7  -7  -1   29.26    2.16 
  -7   7   1   30.45    2.51 
   7   7  -1   32.97    2.31 
   6  -7  -1   -0.64    0.42 
   6  -7  -1   -0.51    0.58 
   6  -7  -1   -0.14    0.47 
   6  -7  -1    0.83    0.47 
   6  -7  -1    0.11    0.54 
  -6  -7   1    0.55    0.72 
   6   7  -1    0.58    0.62 
  -6   7   1    0.22    0.54 
  -6   7   1    0.08    0.56 
   5  -7  -1   32.90    1.87 
   5  -7  -1   30.18    1.98 
   5  -7  -1   27.50    2.08 
   5  -7  -1   27.54    2.13 
   5  -7  -1   28.06    1.96 
  -5  -7   1   28.25    2.15 
  -5   7   1   27.18    1.87 
   5   7  -1   27.55    1.89 
   5   7  -1   28.06    1.33 
   5   7  -1   29.83    1.36 
  -5   7   1   30.32    2.13 
   4  -7  -1  112.14    5.42 
   4  -7  -1  117.47    5.60 
  -4  -7   1  111.49    5.35 
  -4  -7   1  107.71    5.35 
   4  -7  -1  110.15    5.36 
   4  -7  -1  119.57    5.36 
   4  -7  -1  112.48    5.45 
   4  -7  -1  104.49    5.51 
   4  -7  -1  116.59    5.65 
   4  -7  -1  113.03    5.34 
  -4  -7   1  111.86    5.64 
   4  -7  -1  107.10    5.37 
   4  -7  -1  123.96    5.47 
   4   7  -1  112.68    4.91 
  -4   7   1  111.61    5.36 
  -4   7   1  113.00    5.45 
  -4   7   1  121.58    5.64 
  -4   7   1  117.78    5.44 
   4   7  -1  117.27    4.89 
   4   7  -1  117.29    5.37 
  -4   7   1  114.42    5.59 
  -4   7   1  119.50    5.48 
   4   7  -1  114.25    4.90 
  -4   7   1  110.83    5.44 
   4   7  -1  117.49    4.92 
   4   7  -1  112.78    4.93 
  -3  -7   1   89.21    4.32 
   3  -7  -1   78.62    4.05 
   3  -7  -1   84.43    4.10 
   3  -7  -1   76.46    4.05 
   3  -7  -1   86.49    4.16 
   3  -7  -1   90.10    4.09 
  -3  -7   1   78.06    3.98 
   3  -7  -1   89.34    4.10 
   3  -7  -1   79.05    4.12 
   3  -7  -1   80.52    4.11 
   3  -7  -1   81.09    4.15 
  -3  -7   1   81.73    3.97 
  -3   7   1   84.73    4.11 
   3   7  -1   82.04    3.69 
  -3   7   1   81.20    4.10 
  -3   7   1   83.38    4.05 
   3   7  -1   87.48    3.99 
  -3   7   1   78.67    4.06 
   3   7  -1   83.71    3.74 
  -3   7   1   82.61    4.15 
   3   7  -1   82.70    3.73 
   3   7  -1   84.31    3.78 
   3   7  -1   91.43    3.76 
   3   7  -1   87.11    3.75 
   3   7  -1   88.00    3.69 
  -3   7   1   79.81    4.10 
  -3   7   1   83.89    4.25 
  -2  -7   1    0.39    0.33 
   2  -7  -1    0.71    0.43 
   2  -7  -1    1.21    0.46 
   2  -7  -1    0.47    0.42 
  -2  -7   1    0.78    0.35 
   2  -7  -1    0.81    0.40 
   2  -7  -1    0.48    0.43 
  -2  -7   1    0.57    0.40 
  -2  -7   1    0.65    0.31 
  -2  -7   1    0.56    0.28 
   2  -7  -1    0.66    0.32 
   2  -7  -1    0.66    0.35 
  -2  -7   1    0.95    0.38 
   2   7  -1    0.42    0.32 
  -2   7   1    0.66    0.42 
   2   7  -1    0.53    0.27 
   2   7  -1    0.53    0.21 
   2   7  -1    0.78    0.31 
  -2   7   1    0.36    0.37 
   2   7  -1    0.55    0.27 
   2   7  -1    0.43    0.29 
   2   7  -1    1.05    0.33 
   2   7  -1    0.54    0.20 
  -2   7   1    0.57    0.43 
  -2   7   1    0.22    0.41 
   2   7  -1    0.99    0.47 
  -2   7   1    0.80    0.47 
   2   7  -1    0.57    0.27 
  -2   7   1    0.53    0.33 
   2   7  -1    0.16    0.25 
  -2   7   1    0.54    0.41 
  -2   7   1    0.64    0.39 
  -1  -7   1  107.92    4.92 
   1  -7  -1  113.03    4.95 
   1  -7  -1  108.03    5.04 
  -1  -7   1  104.58    4.73 
  -1  -7   1  107.03    4.69 
   1  -7  -1  109.73    5.01 
  -1  -7   1  102.96    4.87 
  -1  -7   1  111.48    4.72 
  -1  -7   1  108.41    4.92 
  -1  -7   1  105.71    4.91 
  -1  -7   1  102.04    5.12 
   1  -7  -1  111.66    5.06 
  -1  -7   1  103.68    4.90 
   1  -7  -1  122.99    5.17 
   1  -7  -1  112.16    5.05 
  -1  -7   1  107.57    4.89 
   1  -7  -1  114.71    4.93 
  -1   7   1  111.05    5.01 
   1   7  -1  108.05    5.11 
   1   7  -1  112.69    4.91 
  -1   7   1  112.68    5.15 
   1   7  -1  108.17    4.91 
   1   7  -1  106.70    4.83 
   1   7  -1  103.50    4.85 
  -1   7   1  118.86    5.01 
   1   7  -1  104.48    4.87 
   1   7  -1  105.21    4.84 
   1   7  -1  113.53    5.00 
  -1   7   1  110.23    5.07 
   1   7  -1  109.91    4.89 
  -1   7   1  110.48    5.01 
  -1   7   1  112.53    4.95 
  -1   7   1  113.06    5.05 
   1   7  -1  102.10    4.86 
  -1   7   1  110.75    5.03 
   1   7  -1  108.49    4.90 
   0  -7   1   58.55    2.84 
   0  -7   1   58.01    2.87 
   0  -7  -1   56.36    2.71 
   0  -7  -1   61.06    3.03 
   0  -7   1   56.18    2.85 
   0  -7   1   55.88    2.79 
   0  -7  -1   60.56    2.69 
   0  -7   1   64.34    3.04 
   0  -7  -1   61.32    2.90 
   0  -7  -1   56.08    2.86 
   0  -7   1   59.81    2.87 
   0  -7  -1   52.33    2.81 
   0  -7   1   55.52    2.85 
   0   7   1   60.25    2.62 
   0   7   1   56.17    2.84 
   0   7  -1   57.72    2.83 
   0   7   1   59.05    2.84 
   0   7   1   55.76    2.84 
   0   7  -1   60.10    2.87 
   0   7   1   58.64    2.68 
   0   7   1   56.36    2.84 
   0   7   1   57.85    2.85 
   0   7   1   58.10    2.59 
   0   7   1   57.81    2.82 
   0   7   1   55.18    2.84 
   0   7  -1   55.61    2.83 
   0   7  -1   59.07    2.85 
   0   7  -1   57.34    2.84 
   0   7  -1   57.64    2.93 
   0   7  -1   61.84    2.99 
   0   7   1   60.36    2.95 
   0   7  -1   59.52    2.60 
   0   7  -1   57.59    2.84 
   0   7   1   56.72    2.95 
   0   7   1   56.34    2.83 
   0   7  -1   57.64    2.65 
   0   7  -1   57.80    2.85 
   0   7  -1   56.66    2.70 
   0   7   1   56.61    2.83 
   0   7  -1   57.70    2.73 
   0   7  -1   59.46    2.87 
   1  -7   1   10.73    0.86 
   1  -7   1   10.23    0.91 
  -1  -7  -1    7.95    0.75 
  -1  -7  -1    9.81    0.80 
  -1  -7  -1    9.50    0.62 
   1  -7   1   10.11    0.90 
   1  -7   1    9.54    0.85 
  -1  -7  -1    9.96    0.64 
  -1  -7  -1    8.73    0.76 
  -1  -7  -1    9.16    0.66 
   1  -7   1    9.21    0.87 
   1  -7   1   10.57    0.91 
  -1  -7  -1    8.56    0.94 
   1  -7   1    8.54    0.85 
  -1   7  -1    9.90    0.87 
   1   7   1   10.31    0.79 
  -1   7  -1    9.50    0.85 
   1   7   1    9.49    0.77 
   1   7   1    9.37    0.63 
  -1   7  -1   10.04    0.85 
   1   7   1    8.96    0.73 
  -1   7  -1    9.09    0.88 
   1   7   1    9.34    0.78 
   1   7   1   10.18    0.84 
  -1   7  -1   11.01    0.82 
   1   7   1    9.89    0.94 
   1   7   1    8.71    0.77 
   1   7   1    9.57    0.84 
  -1   7  -1    8.81    0.90 
  -1   7  -1   10.31    0.78 
   1   7   1    9.07    0.79 
  -1   7  -1    8.54    0.95 
   1   7   1    8.41    0.76 
   1   7   1    9.48    0.74 
  -2  -7  -1    2.17    0.37 
  -2  -7  -1    1.91    0.37 
   2  -7   1    2.89    0.58 
  -2  -7  -1    2.03    0.35 
  -2  -7  -1    1.59    0.57 
   2  -7   1    3.16    0.53 
  -2  -7  -1    2.07    0.40 
  -2  -7  -1    2.46    0.36 
   2  -7   1    2.66    0.61 
  -2  -7  -1    2.46    0.46 
   2  -7   1    2.82    0.51 
   2  -7   1    2.95    0.51 
   2  -7   1    2.99    0.52 
   2  -7   1    2.34    0.49 
  -2   7  -1    3.31    0.59 
  -2   7  -1    2.72    0.54 
   2   7   1    2.27    0.53 
  -2   7  -1    2.15    0.47 
   2   7   1    2.30    0.31 
   2   7   1    1.33    0.35 
   2   7   1    2.14    0.37 
   2   7   1    1.87    0.39 
  -2   7  -1    1.71    0.60 
   2   7   1    2.06    0.40 
  -2   7  -1    3.11    0.60 
  -2   7  -1    2.81    0.54 
  -2   7  -1    2.57    0.51 
   2   7   1    1.75    0.31 
   2   7   1    1.82    0.39 
   2   7   1    1.24    0.39 
   2   7   1    2.65    0.44 
   3  -7   1   53.20    2.79 
   3  -7   1   46.66    2.78 
   3  -7   1   47.19    2.79 
   3  -7   1   52.35    3.02 
   3  -7   1   45.12    2.64 
  -3  -7  -1   52.05    2.50 
  -3  -7  -1   53.01    2.53 
  -3  -7  -1   55.41    2.89 
   3  -7   1   52.26    2.75 
   3  -7   1   51.14    2.72 
   3  -7   1   47.42    2.71 
   3  -7   1   51.87    2.60 
   3   7   1   51.26    2.37 
   3   7   1   49.84    2.43 
   3   7   1   53.46    2.43 
  -3   7  -1   55.06    2.81 
  -3   7  -1   48.29    2.73 
   3   7   1   50.60    2.39 
  -3   7  -1   49.90    2.77 
   3   7   1   56.75    2.45 
  -3   7  -1   49.67    2.72 
  -3   7  -1   45.47    2.81 
  -3   7  -1   47.95    2.72 
   3   7   1   48.23    2.41 
   3   7   1   45.77    2.44 
  -3   7  -1   49.76    2.68 
   3   7   1   50.35    2.70 
   4  -7   1   28.96    1.99 
   4  -7   1   26.58    1.88 
   4  -7   1   30.41    1.88 
   4  -7   1   31.06    2.08 
  -4  -7  -1   26.73    1.97 
   4  -7   1   31.23    1.93 
   4  -7   1   27.06    1.83 
   4  -7   1   25.10    1.84 
   4  -7   1   28.90    1.85 
   4  -7   1   29.44    1.83 
   4  -7   1   30.60    1.71 
  -4   7  -1   27.60    1.89 
  -4   7  -1   27.66    1.86 
  -4   7  -1   31.78    2.09 
   4   7   1   28.67    1.53 
   4   7   1   28.11    1.38 
  -4   7  -1   28.03    1.88 
  -4   7  -1   28.75    1.86 
   4   7   1   27.41    1.47 
   4   7   1   28.33    1.50 
   4   7   1   29.91    1.46 
  -4   7  -1   31.82    2.01 
  -4   7  -1   26.45    1.83 
   4   7   1   29.11    1.50 
   4   7   1   27.27    1.86 
   4   7   1   29.24    1.35 
   5  -7   1   11.14    1.17 
  -5  -7  -1   10.23    1.25 
   5  -7   1   12.23    0.96 
   5  -7   1   10.85    1.33 
   5  -7   1    8.79    1.04 
   5  -7   1    9.60    1.05 
   5  -7   1    8.96    1.15 
   5  -7   1   10.79    1.16 
  -5   7  -1   10.05    1.20 
   5   7   1    9.90    1.13 
  -5   7  -1   10.00    1.12 
   5   7   1    9.77    0.95 
   5   7   1    9.65    0.68 
   5   7   1   11.08    0.65 
   5   7   1    9.94    0.71 
   5   7   1    9.72    0.60 
   6  -7   1    0.14    0.54 
  -6  -7  -1   -0.40    0.55 
   6  -7   1    0.55    0.58 
   6  -7   1    0.19    0.55 
   6  -7   1    0.34    0.65 
   6  -7   1   -0.29    0.53 
   6   7   1    0.07    0.18 
   6   7   1   -0.66    0.37 
   6   7   1    0.19    0.17 
  -6   7  -1   -0.14    0.54 
   6   7   1    0.30    0.43 
   6   7   1   -0.43    0.47 
  -6   7  -1   -0.77    0.50 
   7  -7   1    5.24    1.15 
   7  -7   1    5.83    1.07 
   7  -7   1    7.74    1.20 
   7  -7   1    3.97    1.22 
  -7  -7  -1    6.15    1.28 
   7   7   1    5.69    0.96 
   7   7   1    4.79    0.94 
   7   7   1    5.08    0.92 
  -7   7  -1    4.11    1.15 
   8  -7   1   25.97    2.12 
   8  -7   1   22.76    2.25 
   8  -7   1   26.04    2.05 
   8  -7   1   22.68    2.36 
   8   7   1   27.97    2.35 
  -8   7  -1   23.58    2.33 
   9  -7   1    3.76    1.22 
   9  -7   1    2.89    1.25 
   9  -7   1    3.96    1.05 
   9  -7   1    3.91    0.96 
  -9   7  -1    3.38    1.51 
   9   7   1    1.36    1.15 
   9  -8  -1    5.85    0.95 
   9  -8  -1    6.60    1.66 
   9  -8  -1    7.58    1.24 
   9  -8  -1    4.54    1.36 
   9  -8  -1    6.79    1.20 
  -9   8   1    6.42    1.81 
   9   8  -1    5.70    1.19 
  -8  -8   1    2.20    1.00 
   8  -8  -1    0.11    0.67 
   8  -8  -1    0.26    0.74 
   8  -8  -1    1.06    1.05 
   8  -8  -1    0.24    0.64 
  -8   8   1    2.37    1.04 
   8   8  -1   -0.42    0.67 
   7  -8  -1   24.40    1.99 
  -7  -8   1   19.89    2.08 
   7  -8  -1   26.78    2.27 
   7  -8  -1   25.89    2.00 
   7  -8  -1   22.79    2.27 
   7   8  -1   20.82    1.91 
  -7   8   1   24.05    2.17 
  -6  -8   1   51.98    3.12 
   6  -8  -1   44.48    2.57 
   6  -8  -1   48.04    2.84 
   6  -8  -1   41.89    2.95 
  -6  -8   1   48.00    2.86 
   6  -8  -1   39.43    2.74 
   6  -8  -1   41.92    3.02 
   6   8  -1   45.65    2.79 
  -6   8   1   45.56    2.78 
  -6   8   1   43.25    3.04 
   5  -8  -1    8.37    1.15 
   5  -8  -1    6.58    1.03 
  -5  -8   1    7.65    1.24 
   5  -8  -1    7.23    0.92 
  -5  -8   1    8.52    1.01 
   5  -8  -1    6.95    0.95 
   5  -8  -1    8.68    1.13 
  -5  -8   1    7.70    0.99 
   5   8  -1    6.41    0.91 
   5   8  -1    8.80    0.49 
   5   8  -1    8.86    0.61 
  -5   8   1    7.09    1.16 
  -5   8   1    8.05    1.09 
   5   8  -1    8.99    0.48 
   5   8  -1    9.43    0.59 
   4  -8  -1   21.04    1.65 
   4  -8  -1   21.81    1.64 
   4  -8  -1   20.46    1.54 
  -4  -8   1   27.61    1.69 
  -4  -8   1   25.72    1.63 
   4  -8  -1   20.82    1.70 
   4  -8  -1   20.57    1.20 
   4  -8  -1   19.56    1.65 
   4  -8  -1   21.21    1.67 
  -4  -8   1   24.21    1.86 
   4  -8  -1   22.54    1.73 
  -4   8   1   21.00    1.67 
   4   8  -1   25.20    1.28 
  -4   8   1   23.70    1.69 
  -4   8   1   21.48    1.65 
  -4   8   1   24.04    1.81 
  -4   8   1   22.93    1.65 
  -4   8   1   22.29    1.83 
   4   8  -1   24.37    1.30 
   4   8  -1   26.51    1.28 
   4   8  -1   26.05    1.32 
   4   8  -1   24.45    1.13 
   4   8  -1   25.55    1.30 
  -4   8   1   20.36    1.60 
   4   8  -1   24.32    1.61 
   4   8  -1   24.09    1.15 
   3  -8  -1    7.67    0.93 
   3  -8  -1    6.60    0.81 
  -3  -8   1    6.52    0.74 
  -3  -8   1    6.29    0.75 
   3  -8  -1    8.57    0.97 
   3  -8  -1    8.13    0.87 
   3  -8  -1    8.67    0.95 
   3  -8  -1    8.35    0.87 
   3  -8  -1    8.12    0.97 
  -3  -8   1    6.32    0.90 
   3   8  -1    5.48    0.59 
   3   8  -1    7.23    0.74 
  -3   8   1    8.38    0.97 
   3   8  -1    6.32    0.61 
   3   8  -1    5.99    0.63 
   3   8  -1    5.86    0.57 
   3   8  -1    5.25    0.64 
  -3   8   1    7.68    0.85 
  -3   8   1    7.53    1.04 
  -3   8   1    7.52    0.84 
  -3   8   1    8.16    0.87 
   3   8  -1    5.79    0.61 
  -3   8   1    7.06    0.85 
   3   8  -1    5.06    0.57 
  -3   8   1    6.85    0.85 
   2  -8  -1   86.31    4.03 
  -2  -8   1   83.62    3.81 
  -2  -8   1   80.88    3.76 
   2  -8  -1   82.83    3.99 
   2  -8  -1   80.96    4.00 
   2  -8  -1   83.23    3.96 
  -2  -8   1   79.17    3.83 
   2  -8  -1   80.78    3.91 
   2  -8  -1   85.54    4.03 
  -2  -8   1   73.93    3.86 
  -2  -8   1   79.19    4.13 
   2  -8  -1   79.93    3.97 
  -2  -8   1   76.80    3.74 
   2   8  -1   78.05    3.56 
   2   8  -1   83.75    3.74 
   2   8  -1   80.23    3.57 
  -2   8   1   82.22    3.91 
  -2   8   1   82.91    4.03 
   2   8  -1   78.81    3.70 
  -2   8   1   77.57    3.95 
  -2   8   1   83.50    3.98 
   2   8  -1   84.62    3.79 
  -2   8   1   80.10    3.98 
   2   8  -1   82.67    3.72 
  -2   8   1   77.92    4.06 
  -2   8   1   82.69    3.96 
   2   8  -1   85.38    3.76 
  -2   8   1   79.04    3.93 
   2   8  -1   73.03    3.70 
   2   8  -1   79.26    4.06 
   2   8  -1   71.75    3.75 
   2   8  -1   75.76    3.70 
  -1  -8   1    9.74    0.64 
  -1  -8   1    8.54    0.92 
   1  -8  -1    9.77    0.80 
  -1  -8   1   10.30    0.81 
   1  -8  -1    8.84    0.90 
   1  -8  -1    7.49    0.87 
  -1  -8   1   10.86    0.83 
  -1  -8   1   10.96    0.73 
  -1  -8   1    8.11    0.80 
   1  -8  -1    9.06    0.94 
   1  -8  -1    8.06    0.87 
  -1  -8   1    9.03    0.83 
   1  -8  -1    7.85    0.77 
  -1  -8   1    8.03    0.81 
   1  -8  -1    8.94    0.89 
  -1  -8   1    7.83    0.77 
   1   8  -1    8.73    0.82 
   1   8  -1    7.91    0.79 
   1   8  -1    8.37    0.80 
  -1   8   1    9.15    0.90 
   1   8  -1    7.45    0.77 
  -1   8   1    8.84    0.85 
  -1   8   1    9.41    0.84 
   1   8  -1   10.33    0.80 
  -1   8   1    8.96    0.88 
  -1   8   1    7.96    0.78 
  -1   8   1    9.23    0.91 
  -1   8   1    8.31    0.92 
   1   8  -1   10.38    0.80 
   1   8  -1    9.91    0.97 
   1   8  -1    9.17    0.88 
   1   8  -1    9.48    0.77 
  -1   8   1    8.46    0.92 
   1   8  -1   10.47    0.81 
  -1   8   1    8.55    0.72 
   1   8  -1    8.27    0.79 
   0  -8  -1    9.74    0.71 
   0  -8   1    9.22    0.83 
   0  -8   1    7.90    0.86 
   0  -8   1    9.06    0.81 
   0  -8   1    9.41    0.82 
   0  -8  -1    8.30    0.90 
   0  -8  -1    8.70    0.89 
   0  -8   1    9.09    0.89 
   0  -8   1    9.23    0.87 
   0  -8   1    8.91    0.96 
   0  -8  -1    9.11    0.89 
   0  -8  -1    9.14    0.82 
   0  -8  -1   11.78    0.80 
   0   8   1    9.25    0.63 
   0   8   1    8.68    0.89 
   0   8  -1    9.89    0.90 
   0   8   1   10.07    0.91 
   0   8  -1    8.39    0.60 
   0   8  -1    7.77    0.66 
   0   8   1   10.08    0.84 
   0   8  -1    8.09    0.83 
   0   8  -1   10.32    0.99 
   0   8  -1    9.46    0.85 
   0   8   1   10.61    0.87 
   0   8  -1    8.34    0.66 
   0   8   1    9.53    0.62 
   0   8   1   11.33    0.87 
   0   8   1   10.03    0.87 
   0   8  -1    8.62    0.87 
   0   8  -1    9.24    0.84 
   0   8   1    8.86    0.87 
   0   8   1    9.52    0.97 
   0   8   1   10.05    0.85 
   0   8  -1    6.91    0.75 
   0   8   1    9.97    0.97 
   0   8   1    9.34    0.70 
   0   8  -1    9.64    0.75 
   0   8  -1    8.35    0.82 
   0   8  -1    8.34    0.80 
   0   8   1   10.11    0.86 
   0   8  -1    9.42    0.83 
   1  -8   1   25.76    1.62 
   1  -8   1   27.30    1.70 
  -1  -8  -1   27.77    1.44 
  -1  -8  -1   26.32    1.57 
   1  -8   1   26.60    1.67 
   1  -8   1   26.51    1.68 
  -1  -8  -1   27.64    1.38 
  -1  -8  -1   26.06    1.76 
   1  -8   1   25.20    1.61 
   1  -8   1   24.47    1.62 
   1  -8   1   25.48    1.65 
  -1  -8  -1   27.17    1.62 
  -1  -8  -1   28.81    1.63 
  -1   8  -1   25.22    1.64 
   1   8   1   26.68    1.53 
   1   8   1   25.01    1.56 
   1   8   1   31.37    1.70 
   1   8   1   22.81    1.68 
   1   8   1   27.95    1.60 
  -1   8  -1   27.86    1.65 
  -1   8  -1   23.93    1.70 
  -1   8  -1   26.13    1.79 
  -1   8  -1   26.11    1.64 
  -1   8  -1   27.19    1.56 
  -1   8  -1   26.62    1.70 
   1   8   1   28.75    1.61 
   1   8   1   27.72    1.62 
   1   8   1   29.23    1.55 
  -1   8  -1   23.62    1.53 
   1   8   1   30.78    1.73 
   1   8   1   26.09    1.57 
   1   8   1   30.34    1.60 
   2  -8   1  103.97    5.27 
   2  -8   1  119.71    5.38 
   2  -8   1  111.69    5.33 
  -2  -8  -1  115.12    5.13 
   2  -8   1  106.62    5.29 
  -2  -8  -1  113.90    5.47 
   2  -8   1  108.41    5.26 
  -2  -8  -1  113.14    4.76 
  -2  -8  -1  110.52    4.94 
  -2  -8  -1  113.65    5.08 
  -2  -8  -1  119.37    5.01 
  -2  -8  -1  110.79    5.45 
   2  -8   1  115.11    5.36 
  -2  -8  -1  107.96    4.77 
   2  -8   1  115.05    5.35 
  -2   8  -1  116.09    5.36 
   2   8   1  107.82    5.16 
   2   8   1  117.00    5.26 
  -2   8  -1  114.32    5.35 
   2   8   1  120.56    5.12 
   2   8   1  110.22    5.07 
   2   8   1  114.67    4.94 
  -2   8  -1   96.83    5.17 
  -2   8  -1  112.83    5.31 
   2   8   1  120.03    5.11 
  -2   8  -1  115.01    5.47 
   2   8   1  115.53    5.08 
  -2   8  -1  117.25    5.26 
   2   8   1  109.45    5.09 
   2   8   1  115.91    4.97 
   2   8   1  112.11    5.08 
  -2   8  -1  118.97    5.33 
  -3  -8  -1   15.12    1.39 
   3  -8   1   14.66    1.38 
   3  -8   1   18.91    1.43 
   3  -8   1   20.06    1.33 
   3  -8   1   21.60    1.57 
   3  -8   1   19.11    1.45 
  -3  -8  -1   18.90    1.19 
   3  -8   1   19.16    1.47 
   3  -8   1   18.34    1.46 
  -3  -8  -1   20.50    1.20 
   3   8   1   17.10    1.07 
   3   8   1   18.32    1.15 
   3   8   1   16.30    1.10 
  -3   8  -1   17.69    1.40 
  -3   8  -1   16.35    1.36 
  -3   8  -1   18.23    1.38 
   3   8   1   16.74    1.09 
  -3   8  -1   18.61    1.49 
   3   8   1   15.00    1.14 
   3   8   1   16.13    1.12 
   3   8   1   18.76    1.33 
  -3   8  -1   18.54    1.57 
  -3   8  -1   16.55    1.40 
  -3   8  -1   21.07    1.50 
   3   8   1   19.91    1.16 
   4  -8   1    8.02    1.03 
   4  -8   1    8.25    1.06 
   4  -8   1    6.44    0.92 
   4  -8   1    7.35    1.04 
   4  -8   1    5.40    1.01 
  -4  -8  -1    8.64    0.85 
   4  -8   1    6.37    1.06 
  -4  -8  -1    6.22    0.95 
   4  -8   1    7.99    0.85 
  -4  -8  -1    9.70    0.86 
  -4   8  -1    7.59    1.01 
  -4   8  -1    7.17    0.98 
   4   8   1    8.62    0.63 
  -4   8  -1    8.10    1.06 
  -4   8  -1    7.53    1.03 
  -4   8  -1    7.28    0.93 
   4   8   1    7.00    0.67 
   4   8   1    9.03    1.02 
   4   8   1    8.99    0.67 
   4   8   1    8.17    0.57 
  -4   8  -1    7.36    0.92 
  -4   8  -1    7.50    0.93 
   4   8   1    6.82    0.65 
   4   8   1    6.97    0.64 
   4   8   1    7.43    0.70 
   5  -8   1   35.01    2.30 
   5  -8   1   32.83    2.44 
   5  -8   1   35.40    2.36 
   5  -8   1   33.21    2.45 
  -5  -8  -1   35.00    2.20 
   5  -8   1   34.71    2.26 
  -5  -8  -1   42.34    2.63 
   5  -8   1   34.10    2.36 
   5  -8   1   39.39    2.16 
   5   8   1   35.37    2.36 
   5   8   1   36.78    1.78 
  -5   8  -1   41.02    2.58 
  -5   8  -1   35.32    2.34 
   5   8   1   40.40    1.78 
   5   8   1   36.61    1.82 
   5   8   1   36.80    1.81 
   5   8   1   36.90    1.86 
   6  -8   1    3.07    0.88 
   6  -8   1    2.29    0.82 
  -6  -8  -1    2.90    0.95 
   6  -8   1    2.79    0.86 
   6  -8   1    3.39    1.09 
   6  -8   1    3.69    0.96 
   6   8   1    2.62    0.38 
   6   8   1    2.02    0.34 
  -6   8  -1    2.37    1.05 
   6   8   1    3.07    0.90 
  -6   8  -1    3.47    0.97 
  -7  -8  -1   16.38    1.75 
   7  -8   1   14.74    1.62 
   7  -8   1   17.80    1.97 
   7  -8   1   15.03    1.60 
   7  -8   1   16.24    1.79 
   7   8   1   14.69    1.56 
  -7   8  -1   18.57    1.87 
   8  -8   1    4.90    1.33 
   8  -8   1    3.87    1.17 
   8  -8   1    6.83    1.28 
   8   8   1    5.53    1.26 
  -8   8  -1    7.86    1.62 
  -8  -9   1    9.71    1.64 
   8  -9  -1    9.85    1.46 
   8  -9  -1   10.97    1.80 
   8  -9  -1   10.14    1.59 
   8  -9  -1    8.79    1.37 
   8   9  -1    8.35    1.40 
  -8   9   1   13.24    1.96 
   7  -9  -1   17.70    2.05 
   7  -9  -1   20.50    1.85 
   7  -9  -1   17.75    1.81 
   7  -9  -1   20.38    2.02 
  -7  -9   1   22.66    2.18 
   7   9  -1   22.47    1.90 
  -7   9   1   17.96    2.57 
  -7   9   1   16.13    2.00 
   6  -9  -1   -0.27    0.61 
  -6  -9   1   -0.74    0.65 
   6  -9  -1    0.31    0.69 
   6  -9  -1    0.74    0.73 
  -6  -9   1    0.36    0.55 
   6  -9  -1   -0.07    0.66 
  -6  -9   1    0.86    0.59 
  -6   9   1    1.49    0.82 
   6   9  -1    0.07    0.16 
  -6   9   1    0.52    0.68 
   6   9  -1    0.44    0.56 
   6   9  -1    0.04    0.14 
  -5  -9   1    5.42    0.90 
   5  -9  -1    2.86    0.84 
  -5  -9   1    5.36    0.92 
   5  -9  -1    4.60    1.05 
  -5  -9   1    3.52    0.96 
   5  -9  -1    4.78    1.09 
   5  -9  -1    3.42    0.90 
   5  -9  -1    5.61    0.88 
  -5   9   1    3.72    1.04 
   5   9  -1    4.50    0.47 
   5   9  -1    4.20    0.44 
   5   9  -1    3.90    0.49 
  -5   9   1    8.30    1.12 
   5   9  -1    5.34    0.86 
   5   9  -1    3.97    0.41 
   5   9  -1    3.39    0.48 
   4  -9  -1   20.62    1.72 
   4  -9  -1   18.07    1.52 
   4  -9  -1   18.99    1.48 
   4  -9  -1   19.20    1.66 
   4  -9  -1   18.82    1.61 
   4  -9  -1   19.03    1.65 
  -4  -9   1   19.95    1.82 
   4  -9  -1   18.12    1.55 
  -4  -9   1   16.32    1.36 
  -4  -9   1   20.79    1.51 
   4   9  -1   20.65    1.08 
   4   9  -1   22.14    1.20 
  -4   9   1   19.20    1.58 
   4   9  -1   17.51    1.14 
   4   9  -1   20.39    1.22 
   4   9  -1   20.00    1.20 
   4   9  -1   20.86    1.18 
  -4   9   1   17.40    1.53 
  -4   9   1   15.82    1.60 
   4   9  -1   19.01    1.43 
  -4   9   1   17.90    1.52 
  -4   9   1   17.15    1.72 
  -4   9   1   19.59    1.62 
  -4   9   1   22.30    1.61 
   4   9  -1   20.64    1.09 
   3  -9  -1   37.38    2.30 
   3  -9  -1   34.35    2.28 
   3  -9  -1   31.99    2.23 
   3  -9  -1   34.81    2.26 
   3  -9  -1   39.57    2.30 
  -3  -9   1   37.31    2.51 
  -3  -9   1   40.95    2.17 
  -3  -9   1   34.06    2.11 
   3  -9  -1   34.11    2.31 
   3  -9  -1   36.40    2.33 
  -3   9   1   34.36    2.25 
   3   9  -1   38.64    1.98 
   3   9  -1   42.23    1.98 
   3   9  -1   41.29    2.02 
   3   9  -1   42.06    1.97 
   3   9  -1   37.27    1.98 
   3   9  -1   41.35    2.17 
   3   9  -1   35.99    2.02 
  -3   9   1   35.25    2.25 
  -3   9   1   38.63    2.30 
  -3   9   1   36.37    2.25 
  -3   9   1   37.88    2.33 
   3   9  -1   42.54    2.02 
  -3   9   1   32.21    2.35 
  -3   9   1   34.70    2.33 
  -3   9   1   34.28    2.27 
  -2  -9   1    0.12    0.22 
  -2  -9   1    0.59    0.34 
  -2  -9   1    0.98    0.39 
   2  -9  -1    1.22    0.51 
   2  -9  -1    1.19    0.55 
  -2  -9   1    0.12    0.23 
   2  -9  -1    1.30    0.50 
  -2  -9   1   -0.05    0.21 
   2  -9  -1    1.11    0.52 
  -2  -9   1    0.49    0.25 
   2  -9  -1    0.98    0.51 
  -2  -9   1    0.05    0.38 
  -2  -9   1    0.62    0.45 
   2  -9  -1    1.27    0.50 
   2  -9  -1    0.97    0.53 
   2   9  -1    0.42    0.35 
  -2   9   1    0.13    0.57 
   2   9  -1    0.22    0.41 
   2   9  -1   -0.03    0.39 
  -2   9   1    1.01    0.49 
   2   9  -1    0.35    0.35 
  -2   9   1    0.66    0.51 
   2   9  -1    0.30    0.30 
   2   9  -1    0.73    0.50 
   2   9  -1    0.50    0.36 
  -2   9   1    1.57    0.61 
   2   9  -1    0.48    0.34 
   2   9  -1    0.90    0.39 
   2   9  -1    0.36    0.29 
  -2   9   1    0.73    0.47 
  -2   9   1    0.99    0.46 
   2   9  -1    0.09    0.35 
  -2   9   1    1.94    0.61 
  -2   9   1    0.98    0.50 
  -1  -9   1   57.63    2.68 
  -1  -9   1   51.86    3.14 
  -1  -9   1   55.75    2.96 
   1  -9  -1   57.54    2.94 
   1  -9  -1   61.05    3.13 
  -1  -9   1   55.67    2.98 
   1  -9  -1   57.38    3.08 
  -1  -9   1   59.15    2.95 
   1  -9  -1   67.06    3.20 
  -1  -9   1   51.17    2.87 
   1  -9  -1   63.95    2.96 
  -1  -9   1   58.85    2.89 
  -1  -9   1   55.00    2.96 
   1  -9  -1   57.44    3.05 
   1  -9  -1   68.44    3.27 
   1   9  -1   60.03    2.97 
  -1   9   1   62.65    3.09 
   1   9  -1   58.78    2.98 
   1   9  -1   58.94    2.96 
  -1   9   1   58.43    3.06 
  -1   9   1   58.22    3.15 
  -1   9   1   61.82    3.02 
   1   9  -1   55.86    3.04 
   1   9  -1   56.59    2.94 
  -1   9   1   62.31    3.12 
   1   9  -1   54.37    2.94 
  -1   9   1   64.21    2.84 
   1   9  -1   60.24    2.96 
  -1   9   1   58.78    3.22 
   1   9  -1   60.52    2.92 
  -1   9   1   59.42    2.95 
   1   9  -1   56.43    3.17 
  -1   9   1   58.20    3.06 
   1   9  -1   56.00    2.88 
   1   9  -1   55.79    2.87 
   0  -9   1   32.81    1.98 
   0  -9   1   33.05    1.99 
   0  -9  -1   31.19    2.06 
   0  -9  -1   34.62    1.76 
   0  -9   1   29.79    1.93 
   0  -9   1   37.05    1.94 
   0  -9  -1   32.43    1.97 
   0  -9  -1   31.11    1.96 
   0  -9  -1   35.75    1.82 
   0  -9   1   30.23    2.02 
   0  -9   1   31.79    1.94 
   0  -9   1   35.25    1.88 
   0  -9  -1   31.04    1.92 
   0   9   1   34.93    1.96 
   0   9  -1   33.68    1.92 
   0   9  -1   31.51    1.89 
   0   9   1   35.03    2.00 
   0   9   1   32.38    1.91 
   0   9  -1   34.65    2.00 
   0   9  -1   31.00    1.92 
   0   9  -1   31.60    1.91 
   0   9   1   35.19    2.01 
   0   9  -1   32.04    1.65 
   0   9   1   35.05    1.93 
   0   9  -1   31.63    1.68 
   0   9  -1   32.51    1.97 
   0   9  -1   33.44    1.82 
   0   9  -1   31.74    1.93 
   0   9  -1   34.14    2.08 
   0   9   1   33.65    1.97 
   0   9   1   32.93    1.96 
   0   9   1   31.90    1.94 
   0   9  -1   31.97    1.59 
   0   9   1   33.09    1.68 
   0   9   1   33.24    1.93 
   0   9   1   33.72    1.71 
   0   9  -1   27.92    1.99 
   0   9  -1   33.02    1.92 
   0   9   1   33.29    1.62 
   0   9   1   33.23    2.07 
   0   9   1   36.13    2.11 
  -1  -9  -1    6.75    0.76 
   1  -9   1    7.95    0.82 
  -1  -9  -1    5.36    0.79 
  -1  -9  -1    5.51    0.72 
   1  -9   1    6.70    0.77 
   1  -9   1    5.34    0.74 
   1  -9   1    6.24    0.77 
  -1  -9  -1    7.13    0.56 
   1  -9   1    7.98    0.83 
   1  -9   1    6.08    0.84 
  -1  -9  -1    5.77    0.71 
   1  -9   1    6.41    0.76 
  -1  -9  -1    6.79    0.61 
  -1   9  -1    6.27    0.72 
   1   9   1    6.57    0.76 
   1   9   1    6.01    0.71 
  -1   9  -1    5.48    0.93 
   1   9   1    5.00    0.69 
   1   9   1    6.42    0.69 
  -1   9  -1    5.33    0.78 
   1   9   1    4.76    0.62 
   1   9   1    5.93    0.76 
   1   9   1    5.97    0.74 
  -1   9  -1    6.98    0.81 
  -1   9  -1    6.60    0.78 
   1   9   1    7.63    0.79 
  -1   9  -1    7.08    0.69 
  -1   9  -1    7.10    0.82 
   1   9   1    6.94    0.74 
  -1   9  -1    6.37    0.76 
   1   9   1    6.04    0.87 
   1   9   1    6.11    0.83 
  -2  -9  -1    4.28    0.89 
  -2  -9  -1    3.96    0.65 
   2  -9   1    5.58    0.78 
  -2  -9  -1    4.60    0.52 
  -2  -9  -1    5.19    0.49 
   2  -9   1    4.64    0.78 
   2  -9   1    6.28    0.79 
   2  -9   1    5.51    0.84 
  -2  -9  -1    3.21    0.46 
   2  -9   1    5.69    0.73 
   2  -9   1    5.59    0.76 
   2  -9   1    5.11    0.71 
   2   9   1    3.26    0.50 
   2   9   1    4.27    0.62 
  -2   9  -1    7.61    0.82 
  -2   9  -1    6.38    0.78 
   2   9   1    3.98    0.69 
   2   9   1    3.88    0.60 
   2   9   1    3.22    0.68 
  -2   9  -1    7.59    0.80 
  -2   9  -1    4.97    0.88 
  -2   9  -1    8.52    0.95 
   2   9   1    4.10    0.66 
  -2   9  -1    5.94    0.76 
  -2   9  -1    5.18    0.85 
   2   9   1    2.91    0.61 
   2   9   1    3.68    0.59 
   2   9   1    4.16    0.63 
  -2   9  -1    5.14    0.84 
   2   9   1    3.87    0.64 
   2   9   1    4.70    0.54 
   3  -9   1   32.15    2.06 
  -3  -9  -1   29.88    2.16 
   3  -9   1   32.52    2.16 
  -3  -9  -1   32.44    1.76 
   3  -9   1   33.09    2.15 
   3  -9   1   32.30    2.00 
   3  -9   1   29.62    2.05 
   3  -9   1   31.69    2.15 
   3  -9   1   31.74    2.11 
  -3  -9  -1   30.36    1.78 
  -3   9  -1   29.28    2.25 
  -3   9  -1   31.93    2.15 
   3   9   1   34.42    1.81 
   3   9   1   35.32    1.83 
   3   9   1   34.31    2.05 
  -3   9  -1   30.18    2.02 
   3   9   1   35.87    1.78 
   3   9   1   33.59    1.82 
  -3   9  -1   32.45    2.07 
  -3   9  -1   32.85    2.10 
   3   9   1   34.41    1.83 
  -3   9  -1   29.22    2.06 
   3   9   1   32.58    1.77 
  -3   9  -1   29.38    1.99 
   3   9   1   31.63    1.86 
   4  -9   1   47.97    2.68 
  -4  -9  -1   45.18    2.93 
   4  -9   1   47.39    2.90 
   4  -9   1   45.67    2.81 
  -4  -9  -1   51.79    2.60 
  -4  -9  -1   47.80    2.59 
   4  -9   1   56.49    3.07 
   4  -9   1   50.93    2.93 
   4  -9   1   51.37    3.00 
   4  -9   1   51.07    2.93 
  -4   9  -1   46.22    2.80 
   4   9   1   46.39    2.41 
  -4   9  -1   47.72    2.90 
  -4   9  -1   48.09    2.93 
   4   9   1   47.10    2.42 
   4   9   1   52.20    2.43 
  -4   9  -1   49.11    2.89 
   4   9   1   47.17    2.30 
   4   9   1   46.77    2.34 
   4   9   1   47.59    2.43 
  -4   9  -1   46.02    2.98 
  -4   9  -1   52.96    2.93 
   4   9   1   48.20    2.79 
   4   9   1   47.62    2.48 
  -4   9  -1   50.87    2.87 
   5  -9   1    0.31    0.40 
  -5  -9  -1    1.12    0.79 
   5  -9   1    0.19    0.47 
   5  -9   1    1.71    0.72 
  -5  -9  -1    0.90    0.52 
   5  -9   1    0.44    0.55 
   5  -9   1    1.14    0.76 
   5  -9   1    1.80    0.72 
  -5  -9  -1    0.76    0.52 
   5  -9   1    0.87    0.56 
  -5   9  -1    3.78    0.94 
  -5   9  -1    1.49    0.72 
   5   9   1    0.22    0.33 
   5   9   1    0.28    0.31 
   5   9   1    1.04    0.61 
   5   9   1    0.80    0.31 
   5   9   1    0.31    0.30 
   5   9   1    0.85    0.34 
   6  -9   1    0.62    0.62 
  -6  -9  -1    1.48    0.91 
   6  -9   1    0.43    0.57 
   6  -9   1    0.00    0.47 
   6  -9   1    1.00    0.75 
   6  -9   1    0.11    0.56 
   6  -9   1    0.85    0.65 
   6   9   1   -0.01    0.27 
  -6   9  -1   -0.04    0.61 
  -6   9  -1    1.75    0.85 
   6   9   1    0.26    0.58 
   6   9   1    0.46    0.26 
  -7  -9  -1    5.26    1.08 
   7  -9   1    2.25    1.09 
   7  -9   1    5.68    1.17 
   7  -9   1    6.02    1.32 
   7  -9   1    4.30    1.19 
  -7   9  -1    3.62    1.29 
  -7   9  -1    4.85    1.23 
   7   9   1    7.33    1.25 
   8  -9   1    3.53    1.22 
   8  -9   1    6.22    1.29 
   8  -9   1    1.65    1.12 
   8  -9   1    5.33    1.22 
   8   9   1    4.02    1.20 
  -8   9  -1    2.88    1.12 
   8 -10  -1    8.37    1.49 
  -8 -10   1    7.90    1.60 
   8 -10  -1    7.58    1.70 
  -8  10   1    9.38    1.77 
   8  10  -1    6.31    1.28 
  -7 -10   1    1.82    1.09 
   7 -10  -1    1.53    0.88 
   7 -10  -1    1.55    0.85 
   7 -10  -1    1.72    0.91 
   7 -10  -1    1.35    0.81 
   7  10  -1    2.78    0.90 
  -7  10   1    3.25    1.08 
  -7  10   1    1.01    0.81 
   6 -10  -1   11.54    1.50 
   6 -10  -1   10.49    1.45 
  -6 -10   1   12.13    1.69 
   6 -10  -1    8.08    1.31 
   6 -10  -1   10.34    1.54 
  -6  10   1    8.76    1.45 
   6  10  -1   12.26    1.29 
   6  10  -1   11.63    0.75 
  -6  10   1   12.48    1.51 
   6  10  -1   11.97    0.73 
   5 -10  -1    2.66    0.93 
  -5 -10   1    3.79    0.78 
   5 -10  -1    1.97    0.78 
   5 -10  -1    1.63    0.78 
  -5 -10   1    2.89    1.04 
   5 -10  -1    2.04    0.85 
  -5 -10   1    1.31    0.57 
   5 -10  -1    1.92    0.86 
   5 -10  -1    2.78    0.74 
   5  10  -1    2.33    0.44 
  -5  10   1    1.39    0.70 
   5  10  -1    2.13    0.45 
   5  10  -1    2.11    0.42 
   5  10  -1    2.70    0.45 
   5  10  -1    2.49    0.47 
  -5  10   1    4.08    1.04 
   5  10  -1    3.41    0.74 
  -4 -10   1    5.11    0.78 
   4 -10  -1    4.59    0.82 
   4 -10  -1    4.24    0.91 
   4 -10  -1    3.74    0.82 
   4 -10  -1    4.11    0.85 
  -4 -10   1    4.33    1.13 
   4 -10  -1    3.61    0.80 
   4 -10  -1    4.80    1.00 
  -4 -10   1    5.65    0.85 
   4  10  -1    6.01    0.64 
   4  10  -1    4.67    0.53 
  -4  10   1    4.54    1.29 
  -4  10   1    4.93    0.84 
  -4  10   1    5.20    0.99 
   4  10  -1    5.33    0.63 
   4  10  -1    4.94    0.76 
   4  10  -1    5.09    0.62 
   4  10  -1    5.20    0.66 
  -4  10   1    3.85    0.89 
   4  10  -1    5.31    0.64 
   4  10  -1    5.79    0.58 
  -4  10   1    5.42    0.99 
  -4  10   1    3.89    1.33 
   3 -10  -1    0.52    0.46 
   3 -10  -1    0.41    0.48 
  -3 -10   1    0.35    0.37 
  -3 -10   1   -0.14    0.34 
  -3 -10   1    0.44    0.69 
   3 -10  -1    0.25    0.52 
   3 -10  -1    0.18    0.46 
   3 -10  -1    0.10    0.41 
   3 -10  -1    0.72    0.47 
   3 -10  -1    0.77    0.56 
   3  10  -1    0.45    0.33 
  -3  10   1   -0.06    0.48 
   3  10  -1    0.21    0.34 
   3  10  -1    0.28    0.33 
  -3  10   1   -0.59    0.55 
  -3  10   1    0.20    0.40 
   3  10  -1    0.28    0.35 
  -3  10   1   -0.29    0.56 
   3  10  -1    0.34    0.34 
  -3  10   1    0.51    0.55 
  -3  10   1   -0.46    0.26 
   3  10  -1    0.05    0.34 
  -3  10   1    0.33    0.46 
   3  10  -1    0.25    0.31 
  -3  10   1    0.19    0.43 
   3  10  -1   -0.21    0.28 
   2 -10  -1    8.07    0.91 
  -2 -10   1   10.02    1.13 
   2 -10  -1    4.58    0.92 
  -2 -10   1    9.86    0.66 
   2 -10  -1    6.54    0.89 
  -2 -10   1   10.35    0.91 
  -2 -10   1    7.49    0.80 
  -2 -10   1    9.13    0.84 
   2 -10  -1    8.95    0.95 
  -2 -10   1    8.73    0.64 
   2 -10  -1    9.39    1.08 
   2 -10  -1    7.60    0.91 
   2 -10  -1    7.65    1.00 
  -2  10   1    6.76    1.02 
   2  10  -1    9.08    0.85 
  -2  10   1    8.62    0.94 
   2  10  -1    9.64    0.84 
   2  10  -1    7.50    0.80 
  -2  10   1    7.76    1.01 
   2  10  -1    9.52    0.84 
  -2  10   1    9.23    1.07 
  -2  10   1    7.67    0.92 
  -2  10   1    7.17    0.92 
   2  10  -1    8.90    0.88 
   2  10  -1    9.26    0.75 
  -2  10   1    7.91    1.01 
   2  10  -1    6.97    0.90 
   2  10  -1    8.92    0.75 
   2  10  -1    6.57    0.93 
   2  10  -1    7.43    0.84 
  -2  10   1    8.39    0.96 
   2  10  -1    7.31    0.83 
   1 -10  -1   46.60    2.77 
  -1 -10   1   49.30    2.73 
  -1 -10   1   41.93    2.83 
  -1 -10   1   49.40    2.67 
   1 -10  -1   47.84    2.79 
   1 -10  -1   53.71    2.70 
  -1 -10   1   48.09    2.72 
  -1 -10   1   51.16    2.65 
   1 -10  -1   49.19    2.89 
   1 -10  -1   54.56    2.87 
   1 -10  -1   48.79    2.85 
  -1 -10   1   50.38    2.73 
   1 -10  -1   50.09    2.64 
  -1 -10   1   51.50    2.60 
  -1 -10   1   52.15    2.38 
  -1  10   1   46.82    2.77 
   1  10  -1   52.54    2.71 
  -1  10   1   52.32    2.66 
  -1  10   1   51.58    2.78 
   1  10  -1   55.41    2.67 
  -1  10   1   50.74    2.84 
  -1  10   1   44.69    2.85 
  -1  10   1   45.89    2.85 
   1  10  -1   55.51    2.76 
   1  10  -1   52.36    2.97 
  -1  10   1   48.66    2.49 
  -1  10   1   49.01    2.71 
  -1  10   1   46.72    2.78 
   1  10  -1   53.60    2.85 
   1  10  -1   52.67    2.75 
   1  10  -1   49.98    2.69 
   1  10  -1   48.15    2.60 
   1  10  -1   52.35    2.70 
   1  10  -1   57.21    2.75 
   1  10  -1   55.24    2.67 
   0 -10  -1    4.63    0.75 
   0 -10   1    5.04    0.68 
   0 -10   1    5.15    0.78 
   0 -10  -1    6.04    0.62 
   0 -10  -1    5.28    0.78 
   0 -10  -1    4.34    0.87 
   0 -10  -1    3.87    0.66 
   0 -10   1    3.85    0.72 
   0 -10  -1    5.61    0.61 
   0 -10   1    4.69    0.75 
   0 -10   1    4.12    0.60 
   0 -10   1    4.26    0.77 
   0 -10   1    4.39    0.75 
   0  10  -1    4.22    0.74 
   0  10  -1    4.67    0.67 
   0  10   1    6.05    0.86 
   0  10  -1    4.46    0.70 
   0  10   1    5.11    0.69 
   0  10   1    5.60    0.75 
   0  10   1    5.95    0.49 
   0  10  -1    3.47    0.41 
   0  10   1    6.18    0.53 
   0  10  -1    4.55    0.60 
   0  10   1    5.53    0.53 
   0  10   1    6.23    0.77 
   0  10  -1    3.67    0.78 
   0  10   1    5.25    0.79 
   0  10   1    5.45    0.78 
   0  10   1    4.94    0.83 
   0  10  -1    5.05    0.81 
   0  10  -1    4.37    0.49 
   0  10  -1    5.01    0.72 
   0  10  -1    5.24    0.50 
   0  10  -1    4.62    0.64 
   0  10  -1    4.33    0.66 
   0  10   1    5.58    0.72 
   0  10   1    4.61    0.71 
   1 -10   1    5.20    0.79 
   1 -10   1    6.23    0.88 
   1 -10   1    7.04    0.92 
  -1 -10  -1    8.87    0.90 
   1 -10   1    6.74    0.78 
  -1 -10  -1   10.05    0.68 
  -1 -10  -1    7.77    0.87 
  -1 -10  -1    6.21    0.65 
  -1 -10  -1    6.46    0.79 
   1 -10   1    6.45    0.81 
   1 -10   1    7.45    0.88 
  -1 -10  -1    6.04    0.88 
   1 -10   1    7.06    0.85 
   1  10   1    7.30    0.81 
  -1  10  -1    6.99    0.84 
  -1  10  -1    7.56    0.87 
   1  10   1    6.79    0.81 
  -1  10  -1    8.06    0.94 
   1  10   1    6.68    0.94 
   1  10   1    9.57    0.91 
   1  10   1    8.69    0.89 
  -1  10  -1    6.37    0.83 
   1  10   1    6.32    0.75 
   1  10   1    8.39    0.86 
   1  10   1    6.23    0.87 
   1  10   1    7.25    0.85 
  -1  10  -1    7.89    0.81 
   1  10   1    6.78    0.74 
  -1  10  -1    8.24    0.82 
   1  10   1    5.70    0.94 
  -1  10  -1    5.90    1.02 
  -1  10  -1    6.08    0.95 
  -1  10  -1    7.37    0.68 
  -2 -10  -1    8.51    0.78 
   2 -10   1    9.02    1.01 
   2 -10   1    9.32    1.07 
   2 -10   1    8.21    1.04 
   2 -10   1    8.17    1.06 
   2 -10   1    9.86    1.06 
  -2 -10  -1   10.68    1.24 
   2 -10   1    9.43    0.97 
  -2 -10  -1   10.01    0.93 
  -2 -10  -1    9.80    0.70 
  -2 -10  -1    8.72    0.73 
   2 -10   1    7.27    0.91 
   2  10   1    7.97    0.84 
   2  10   1    8.17    0.91 
   2  10   1   10.22    1.02 
  -2  10  -1    7.04    0.95 
  -2  10  -1    7.75    0.97 
   2  10   1    8.71    0.82 
   2  10   1    8.98    0.75 
   2  10   1    8.99    0.87 
   2  10   1    8.04    0.88 
  -2  10  -1    8.97    1.08 
  -2  10  -1    8.30    0.98 
   2  10   1    8.95    0.87 
  -2  10  -1    7.47    0.92 
   2  10   1    8.47    0.88 
  -2  10  -1    9.24    0.96 
  -2  10  -1    8.70    0.93 
  -2  10  -1    9.30    1.06 
   2  10   1    8.64    1.10 
   2  10   1    7.82    0.75 
  -3 -10  -1    3.14    0.84 
   3 -10   1    3.21    0.72 
   3 -10   1    3.79    0.86 
   3 -10   1    4.56    0.88 
   3 -10   1    4.09    0.93 
   3 -10   1    3.13    0.81 
  -3 -10  -1    3.14    0.28 
   3 -10   1    4.68    0.79 
   3 -10   1    3.85    0.74 
  -3 -10  -1    3.23    0.49 
  -3 -10  -1    3.17    0.28 
  -3 -10  -1    3.76    0.56 
   3  10   1    2.39    0.57 
   3  10   1    3.44    0.73 
   3  10   1    4.13    0.61 
   3  10   1    2.03    0.53 
   3  10   1    3.67    0.58 
  -3  10  -1    4.60    0.80 
   3  10   1    2.61    0.59 
  -3  10  -1    5.25    0.83 
  -3  10  -1    1.38    0.76 
  -3  10  -1    3.37    0.73 
  -3  10  -1    3.08    0.86 
  -3  10  -1    2.97    0.81 
  -3  10  -1    3.45    0.78 
   3  10   1    4.33    0.63 
   3  10   1    3.10    0.57 
  -4 -10  -1   12.65    1.20 
   4 -10   1   13.79    1.44 
   4 -10   1   14.14    1.41 
   4 -10   1   12.20    1.41 
   4 -10   1   10.64    1.29 
   4 -10   1   13.68    1.23 
   4 -10   1   13.41    1.38 
   4 -10   1   12.45    1.30 
  -4 -10  -1   14.30    1.48 
  -4 -10  -1   14.55    1.15 
  -4  10  -1   14.56    1.46 
   4  10   1   15.95    1.08 
   4  10   1   13.42    1.03 
   4  10   1   15.41    1.13 
  -4  10  -1   12.04    1.36 
   4  10   1   15.31    0.97 
   4  10   1   13.23    1.04 
   4  10   1   13.53    0.98 
  -4  10  -1   12.19    1.33 
  -4  10  -1   15.29    1.44 
   4  10   1   11.75    1.23 
   4  10   1   14.06    1.06 
  -5 -10  -1    9.78    1.44 
   5 -10   1    6.84    1.27 
   5 -10   1   10.16    1.35 
   5 -10   1    8.89    1.00 
   5 -10   1    7.35    1.08 
   5 -10   1   10.27    1.43 
   5 -10   1    8.33    1.18 
   5 -10   1    8.97    1.17 
   5  10   1    9.48    0.86 
   5  10   1    9.42    0.54 
   5  10   1    9.34    0.56 
   5  10   1    9.81    0.79 
   5  10   1    9.73    0.85 
  -5  10  -1    9.78    1.37 
   5  10   1    9.19    0.82 
   5  10   1   12.32    1.27 
   5  10   1    8.39    0.80 
  -5  10  -1   10.50    1.31 
   6 -10   1    0.50    0.78 
   6 -10   1    0.72    0.78 
   6 -10   1    1.90    0.90 
  -6 -10  -1    1.59    0.93 
   6 -10   1    1.05    0.71 
   6 -10   1   -0.39    0.65 
   6 -10   1    0.52    0.64 
   6  10   1    0.75    0.24 
  -6  10  -1   -0.06    0.76 
   6  10   1    0.81    0.32 
   6  10   1    1.39    0.75 
   6  10   1    0.72    0.23 
  -6  10  -1    2.90    1.08 
   6  10   1    0.78    0.38 
   7 -10   1    2.88    0.97 
   7 -10   1    1.63    1.10 
   7 -10   1    3.01    1.04 
  -7 -10  -1    1.79    0.86 
   7 -10   1    1.60    0.93 
   7  10   1    1.16    0.14 
  -7  10  -1    1.74    0.92 
   7  10   1    0.49    0.74 
   7  10   1    1.56    0.17 
   8 -10   1    1.24    0.86 
   8 -10   1    1.80    1.22 
   8  10   1    2.39    1.04 
  -8  10  -1    1.32    0.98 
   8 -11  -1    5.02    1.39 
  -8 -11   1    3.82    1.28 
   8 -11  -1    5.05    1.30 
   8 -11  -1    4.26    1.44 
   8  11  -1    4.05    1.16 
  -8  11   1    4.70    1.42 
   7 -11  -1    7.68    1.45 
   7 -11  -1    7.44    1.35 
  -7 -11   1    4.95    1.32 
   7 -11  -1    6.31    1.37 
   7 -11  -1    5.57    1.22 
   7  11  -1    5.52    1.11 
  -7  11   1    7.47    1.49 
  -7  11   1    5.91    1.52 
   6 -11  -1    0.75    0.70 
   6 -11  -1    1.67    0.88 
   6 -11  -1    0.47    0.69 
   6 -11  -1    0.05    0.59 
  -6 -11   1    0.66    0.96 
   6  11  -1    0.26    0.13 
   6  11  -1   -0.07    0.29 
   6  11  -1    0.43    0.55 
   6  11  -1    0.51    0.34 
  -6  11   1    1.14    0.84 
   6  11  -1    0.17    0.12 
  -6  11   1    2.44    0.94 
   5 -11  -1    2.71    0.87 
   5 -11  -1    3.58    0.94 
   5 -11  -1    2.30    0.76 
   5 -11  -1    2.67    0.90 
  -5 -11   1    4.19    1.24 
   5 -11  -1    5.73    1.15 
   5 -11  -1    2.96    1.02 
   5  11  -1    2.72    0.53 
   5  11  -1    3.74    0.87 
   5  11  -1    2.72    0.26 
   5  11  -1    2.43    0.52 
   5  11  -1    2.84    0.59 
  -5  11   1    3.86    1.08 
   5  11  -1    2.26    0.24 
   5  11  -1    2.89    0.54 
   5  11  -1    2.47    0.56 
   4 -11  -1    0.64    0.63 
   4 -11  -1    1.17    0.70 
   4 -11  -1    0.54    0.54 
  -4 -11   1    1.33    0.71 
   4 -11  -1    0.66    0.57 
  -4 -11   1    0.76    0.48 
  -4 -11   1    0.90    0.53 
   4 -11  -1    1.17    0.72 
   4 -11  -1    0.80    0.74 
   4  11  -1    0.89    0.43 
   4  11  -1    0.87    0.39 
  -4  11   1    1.37    0.73 
   4  11  -1    0.92    0.37 
   4  11  -1    0.84    0.35 
   4  11  -1    0.60    0.38 
  -4  11   1    1.34    0.73 
  -4  11   1    0.89    0.76 
  -4  11   1    0.78    0.64 
   4  11  -1    1.15    0.41 
   4  11  -1    0.89    0.52 
   4  11  -1    1.12    0.42 
  -3 -11   1   -0.08    0.20 
   3 -11  -1   -0.20    0.42 
   3 -11  -1    0.33    0.40 
  -3 -11   1   -0.28    0.30 
   3 -11  -1    0.02    0.44 
   3 -11  -1    0.57    0.68 
   3 -11  -1    0.40    0.47 
  -3 -11   1    0.90    0.64 
  -3 -11   1   -0.04    0.37 
   3 -11  -1    0.94    0.64 
   3  11  -1    0.41    0.41 
   3  11  -1    0.29    0.35 
  -3  11   1    0.59    0.64 
   3  11  -1   -0.10    0.34 
   3  11  -1    0.29    0.36 
   3  11  -1    0.38    0.36 
   3  11  -1    0.39    0.40 
  -3  11   1   -0.13    0.60 
  -3  11   1    0.01    0.41 
   3  11  -1    0.18    0.32 
  -3  11   1    1.14    0.68 
  -3  11   1   -0.10    0.50 
  -3  11   1    0.21    0.54 
   3  11  -1   -0.13    0.33 
  -3  11   1   -0.63    0.54 
  -3  11   1    0.50    0.63 
  -2 -11   1    0.83    0.41 
   2 -11  -1    1.09    0.57 
  -2 -11   1    0.71    0.55 
   2 -11  -1    0.98    0.52 
  -2 -11   1    0.40    0.21 
   2 -11  -1    1.62    0.66 
   2 -11  -1    0.16    0.43 
   2 -11  -1    0.56    0.52 
   2 -11  -1    0.54    0.48 
  -2 -11   1    0.55    0.40 
  -2  11   1    0.64    0.53 
  -2  11   1    0.98    0.51 
  -2  11   1    1.35    0.72 
   2  11  -1    1.26    0.48 
  -2  11   1    0.03    0.38 
   2  11  -1    0.23    0.43 
   2  11  -1    0.53    0.46 
   2  11  -1    0.80    0.44 
  -2  11   1    0.51    0.46 
  -2  11   1   -0.13    0.28 
   2  11  -1    0.55    0.48 
  -2  11   1    0.71    0.66 
  -2  11   1    1.16    0.67 
   2  11  -1    1.18    0.39 
   2  11  -1    0.87    0.52 
   2  11  -1    0.44    0.39 
   2  11  -1    0.68    0.36 
   2  11  -1    0.55    0.41 
   2  11  -1    0.90    0.44 
   1 -11  -1    4.44    0.93 
  -1 -11   1    5.61    0.79 
   1 -11  -1    6.34    0.78 
   1 -11  -1    4.97    0.82 
  -1 -11   1    4.83    0.87 
  -1 -11   1    6.24    0.73 
  -1 -11   1    7.75    0.78 
   1 -11  -1    5.10    0.71 
   1 -11  -1    6.39    0.84 
  -1 -11   1    6.73    0.86 
   1 -11  -1    5.38    0.90 
  -1 -11   1    7.83    0.89 
   1  11  -1    6.78    0.93 
   1  11  -1    5.44    0.77 
   1  11  -1    7.50    0.80 
   1  11  -1    6.87    0.85 
  -1  11   1    5.57    0.79 
   1  11  -1    6.93    0.79 
  -1  11   1    6.80    0.79 
  -1  11   1    4.79    0.82 
  -1  11   1    3.78    0.73 
  -1  11   1    6.02    0.88 
   1  11  -1    7.48    0.80 
   1  11  -1    7.82    0.91 
  -1  11   1    6.17    0.83 
  -1  11   1    6.15    0.84 
  -1  11   1    5.76    1.02 
   1  11  -1    6.22    0.83 
   1  11  -1    6.37    0.84 
  -1  11   1    6.25    0.67 
   1  11  -1    8.54    1.02 
   1  11  -1    5.82    0.77 
   0 -11   1    1.79    0.60 
   0 -11  -1    2.61    0.73 
   0 -11   1    2.00    0.60 
   0 -11  -1    2.10    0.66 
   0 -11  -1    3.48    0.55 
   0 -11  -1    2.40    0.50 
   0 -11  -1    3.38    0.78 
   0 -11   1    2.41    0.63 
   0 -11   1    3.12    0.62 
   0 -11   1    1.67    0.54 
   0 -11   1    2.42    0.57 
   0 -11   1    2.07    0.67 
   0 -11  -1    2.04    0.58 
   0  11  -1    2.19    0.61 
   0  11   1    2.87    0.96 
   0  11  -1    2.23    0.68 
   0  11   1    2.36    0.49 
   0  11   1    2.28    0.36 
   0  11  -1    2.20    0.57 
   0  11   1    1.57    0.67 
   0  11  -1    1.72    0.62 
   0  11  -1    2.07    0.56 
   0  11  -1    2.61    0.66 
   0  11   1    3.73    0.79 
   0  11  -1    2.31    0.66 
   0  11  -1    2.43    0.75 
   0  11   1    2.96    0.71 
   0  11   1    2.62    0.70 
   0  11  -1    2.20    0.34 
   0  11   1    1.60    0.62 
   0  11   1    2.02    0.43 
   0  11   1    2.49    0.55 
   0  11   1    3.08    0.72 
   0  11  -1    2.59    0.43 
   0  11   1    1.92    0.69 
   0  11  -1    2.81    0.65 
   0  11  -1    1.42    0.59 
  -1 -11  -1    1.52    0.73 
   1 -11   1    1.24    0.53 
   1 -11   1    1.80    0.57 
  -1 -11  -1    2.43    0.46 
   1 -11   1    0.89    0.51 
  -1 -11  -1    2.75    0.66 
   1 -11   1    0.93    0.60 
   1 -11   1    1.67    0.67 
   1 -11   1    1.53    0.63 
  -1 -11  -1    2.77    0.62 
   1 -11   1    1.41    0.52 
  -1 -11  -1    2.75    0.44 
  -1  11  -1    1.21    0.46 
   1  11   1    1.77    0.54 
  -1  11  -1    1.11    0.51 
  -1  11  -1    1.69    0.58 
   1  11   1    1.46    0.50 
   1  11   1    1.73    0.59 
   1  11   1    1.79    0.56 
   1  11   1    2.03    0.61 
   1  11   1    1.55    0.61 
  -1  11  -1    1.44    0.70 
  -1  11  -1    1.63    0.56 
   1  11   1    3.44    0.71 
   1  11   1    1.75    0.57 
   1  11   1    3.50    0.64 
   1  11   1    1.57    0.71 
  -1  11  -1    1.18    0.69 
  -1  11  -1    2.55    0.59 
  -1  11  -1    1.30    0.40 
   1  11   1    1.97    0.66 
  -1  11  -1    1.41    0.65 
   2 -11   1    1.70    0.65 
  -2 -11  -1    1.68    0.38 
   2 -11   1    0.44    0.46 
   2 -11   1    0.72    0.52 
  -2 -11  -1    1.25    0.79 
  -2 -11  -1    1.02    0.36 
   2 -11   1    1.60    0.65 
   2 -11   1    0.07    0.36 
   2 -11   1    1.27    0.55 
   2 -11   1    1.47    0.68 
   2  11   1    1.10    0.41 
   2  11   1    0.11    0.40 
  -2  11  -1    0.90    0.49 
  -2  11  -1    0.65    0.53 
   2  11   1    1.37    0.53 
   2  11   1    1.44    0.58 
  -2  11  -1    1.75    0.72 
  -2  11  -1    4.03    0.74 
   2  11   1    1.42    0.53 
   2  11   1    1.81    0.53 
   2  11   1    0.87    0.53 
  -2  11  -1    1.37    0.63 
  -2  11  -1    1.07    0.69 
   2  11   1    1.03    0.41 
   2  11   1    0.80    0.48 
  -2  11  -1    1.03    0.53 
   2  11   1    1.03    0.49 
  -2  11  -1    0.55    0.50 
   2  11   1    1.68    0.47 
   3 -11   1    7.66    1.08 
   3 -11   1    4.93    0.86 
   3 -11   1    5.62    1.01 
   3 -11   1    4.35    0.97 
  -3 -11  -1    5.71    1.01 
  -3 -11  -1    7.63    0.73 
   3 -11   1    6.83    1.08 
   3 -11   1    8.09    1.02 
   3 -11   1    6.24    0.96 
   3  11   1    4.80    0.79 
   3  11   1    6.94    0.78 
  -3  11  -1    5.93    0.94 
   3  11   1    6.41    0.45 
   3  11   1    4.95    0.84 
  -3  11  -1    7.33    1.15 
   3  11   1    8.07    0.86 
   3  11   1    5.10    0.72 
  -3  11  -1    6.90    0.98 
   3  11   1    5.92    0.82 
   3  11   1    5.12    0.84 
  -3  11  -1    6.70    0.97 
  -3  11  -1    5.68    1.17 
   3  11   1    6.89    0.45 
  -3  11  -1    5.16    0.90 
  -3  11  -1    6.66    0.94 
   3  11   1    6.25    0.82 
  -3  11  -1    6.74    0.94 
   4 -11   1    1.00    0.56 
   4 -11   1    1.25    0.72 
   4 -11   1    0.41    0.66 
   4 -11   1    0.65    0.52 
   4 -11   1    0.66    0.71 
   4 -11   1    1.50    0.79 
  -4 -11  -1    0.84    0.64 
   4 -11   1    0.57    0.67 
   4  11   1    0.58    0.40 
   4  11   1    0.83    0.40 
   4  11   1    0.28    0.34 
  -4  11  -1    0.17    0.60 
   4  11   1    0.44    0.52 
   4  11   1    0.13    0.39 
   4  11   1    0.63    0.46 
   4  11   1    0.80    0.41 
  -4  11  -1    1.00    0.75 
  -4  11  -1   -0.23    0.61 
   5 -11   1    0.97    0.76 
   5 -11   1    1.58    0.90 
   5 -11   1    0.64    0.60 
  -5 -11  -1    1.74    1.02 
   5 -11   1    0.76    0.87 
   5 -11   1    1.17    0.62 
   5 -11   1    2.62    0.94 
   5 -11   1    1.92    0.82 
   5  11   1    1.01    0.45 
   5  11   1    1.18    0.47 
   5  11   1    1.36    0.72 
   5  11   1    1.07    0.34 
   5  11   1    1.24    0.48 
   5  11   1    1.76    0.48 
  -5  11  -1    1.84    0.91 
   5  11   1    0.98    0.30 
   6 -11   1    2.51    0.95 
  -6 -11  -1    1.00    0.87 
   6 -11   1    2.08    0.80 
   6 -11   1    1.59    0.95 
   6 -11   1   -0.11    0.59 
   6 -11   1    0.40    0.56 
   6  11   1    1.03    0.33 
   6  11   1    2.02    0.84 
   6  11   1    0.99    0.32 
   6  11   1    0.93    0.41 
  -6  11  -1    1.01    0.95 
   7 -11   1    0.33    0.77 
   7 -11   1    0.52    0.66 
   7 -11   1    1.52    1.08 
  -7 -11  -1    0.45    0.84 
   7 -11   1   -0.67    0.80 
  -7  11  -1    0.97    1.03 
   7  11   1    0.00    0.21 
   7  11   1    0.03    0.22 
  -7  11  -1    1.33    1.09 
   7  11   1    0.54    0.79 
   8 -11   1    1.72    1.14 
   8 -11   1    1.64    0.96 
   8 -11   1    2.71    1.13 
   8 -11   1    2.42    1.09 
   8  11   1    3.53    1.12 
  -8  11  -1    1.70    1.33 
   7 -12  -1    6.47    1.57 
   7 -12  -1   16.19    1.87 
   7 -12  -1   11.97    1.69 
  -7 -12   1   13.55    1.78 
  -7  12   1   16.70    1.92 
  -7  12   1    8.80    1.49 
   6 -12  -1   -0.20    0.47 
   6 -12  -1    0.63    0.69 
   6 -12  -1    0.13    0.59 
  -6 -12   1   -0.18    0.87 
   6 -12  -1    1.27    0.84 
   6  12  -1    0.42    0.26 
   6  12  -1    0.64    0.60 
  -6  12   1    1.62    0.96 
   6  12  -1    0.49    0.37 
   6  12  -1    0.36    0.24 
  -6  12   1   -0.37    0.76 
   5 -12  -1    1.03    0.80 
   5 -12  -1   -0.09    0.46 
   5 -12  -1    0.94    0.82 
  -5 -12   1   -0.56    0.79 
   5 -12  -1    0.51    0.48 
   5 -12  -1    1.25    0.79 
   5 -12  -1    1.79    0.87 
   5  12  -1    0.29    0.35 
   5  12  -1    0.71    0.46 
  -5  12   1    1.01    0.85 
  -5  12   1   -0.03    0.53 
   5  12  -1   -0.19    0.45 
   5  12  -1    0.34    0.24 
   5  12  -1    0.24    0.36 
   5  12  -1    0.51    0.25 
  -5  12   1   -0.24    0.45 
   4 -12  -1    5.85    1.10 
   4 -12  -1    3.43    0.98 
   4 -12  -1    1.87    0.75 
  -4 -12   1    4.00    1.09 
   4 -12  -1    4.26    1.05 
   4 -12  -1    2.36    0.78 
   4 -12  -1    3.11    0.89 
   4  12  -1    3.57    0.62 
  -4  12   1    2.78    0.85 
   4  12  -1    5.26    0.72 
  -4  12   1    3.37    0.94 
   4  12  -1    4.53    0.76 
   4  12  -1    4.40    0.66 
  -4  12   1    3.06    1.01 
   4  12  -1    3.78    0.81 
   4  12  -1    3.79    0.70 
  -4  12   1    5.30    1.04 
   3 -12  -1   22.07    1.78 
   3 -12  -1   20.24    1.80 
   3 -12  -1   21.74    1.87 
   3 -12  -1   23.42    1.91 
  -3 -12   1   22.58    1.98 
  -3 -12   1   23.29    1.58 
   3 -12  -1   24.51    1.81 
  -3 -12   1   23.05    1.54 
   3 -12  -1   20.22    1.80 
   3  12  -1   22.41    1.09 
   3  12  -1   21.02    1.46 
   3  12  -1   21.11    1.55 
  -3  12   1   20.49    1.75 
  -3  12   1   21.64    1.82 
   3  12  -1   21.81    1.09 
   3  12  -1   20.08    1.50 
   3  12  -1   19.29    1.54 
  -3  12   1   25.78    1.86 
  -3  12   1   27.13    2.18 
  -3  12   1   21.73    1.86 
  -3  12   1   20.74    1.80 
  -3  12   1   25.61    1.97 
  -3  12   1   23.99    1.82 
   3  12  -1   23.22    1.55 
   2 -12  -1    0.53    0.50 
   2 -12  -1    0.29    0.44 
   2 -12  -1    0.33    0.45 
  -2 -12   1    0.43    0.40 
  -2 -12   1    0.24    0.63 
   2 -12  -1    0.34    0.52 
   2 -12  -1   -0.13    0.54 
  -2 -12   1    0.94    0.50 
   2 -12  -1   -0.46    0.53 
  -2  12   1    0.76    0.67 
  -2  12   1    0.37    0.51 
  -2  12   1    0.04    0.61 
  -2  12   1    0.48    0.52 
  -2  12   1    0.99    0.46 
   2  12  -1    0.67    0.51 
   2  12  -1    1.22    0.55 
   2  12  -1    0.99    0.56 
  -2  12   1    0.54    0.65 
   2  12  -1    0.78    0.43 
   2  12  -1    0.10    0.51 
   2  12  -1    0.50    0.37 
   2  12  -1    0.14    0.35 
  -2  12   1    0.93    0.55 
  -2  12   1    1.03    0.58 
  -2  12   1    0.91    0.71 
   2  12  -1   -0.31    0.45 
   1 -12  -1    2.51    0.64 
   1 -12  -1    2.55    0.71 
   1 -12  -1    1.67    0.74 
  -1 -12   1    2.87    0.57 
   1 -12  -1    1.75    0.70 
   1 -12  -1    2.00    0.75 
   1 -12  -1    2.86    0.63 
  -1 -12   1    2.42    0.59 
  -1 -12   1    2.22    0.74 
  -1  12   1    2.59    0.78 
   1  12  -1    2.51    0.72 
  -1  12   1    2.75    0.66 
   1  12  -1    3.12    0.66 
  -1  12   1    1.62    0.80 
  -1  12   1    1.76    0.61 
  -1  12   1    2.87    0.54 
   1  12  -1    2.45    0.83 
   1  12  -1    2.20    0.64 
   1  12  -1    2.22    0.58 
  -1  12   1    3.04    0.85 
  -1  12   1    2.06    0.71 
  -1  12   1    1.79    0.81 
   1  12  -1    3.51    0.65 
   1  12  -1    2.94    0.80 
  -1  12   1    3.16    0.65 
   0 -12   1   39.19    2.36 
   0 -12   1   44.71    2.76 
   0 -12   1   39.95    2.52 
   0 -12  -1   39.99    2.50 
   0 -12  -1   39.68    2.51 
   0 -12   1   40.52    2.53 
   0 -12  -1   41.75    2.74 
   0 -12   1   45.55    2.40 
   0 -12  -1   40.15    2.27 
   0 -12  -1   39.56    2.54 
   0 -12   1   45.90    2.59 
   0 -12  -1   41.27    2.22 
   0 -12   1   39.64    2.51 
   0  12  -1   42.71    2.64 
   0  12  -1   45.87    2.57 
   0  12   1   48.82    2.62 
   0  12  -1   42.75    2.53 
   0  12  -1   42.92    2.69 
   0  12   1   41.32    2.48 
   0  12   1   42.00    2.71 
   0  12  -1   40.42    2.33 
   0  12   1   35.88    1.85 
   0  12   1   38.82    2.50 
   0  12   1   42.65    2.45 
   0  12  -1   41.39    2.53 
   0  12  -1   41.16    2.41 
   0  12   1   39.36    2.41 
   0  12   1   43.03    2.65 
  -1 -12  -1    0.38    0.49 
   1 -12   1    0.72    0.48 
   1 -12   1    1.04    0.52 
   1 -12   1    1.35    0.56 
  -1 -12  -1    0.52    0.33 
  -1 -12  -1    1.06    0.40 
   1 -12   1    0.69    0.49 
   1 -12   1    1.16    0.69 
   1 -12   1    0.57    0.56 
   1 -12   1    0.63    0.47 
   1  12   1    0.77    0.52 
   1  12   1    0.29    0.54 
  -1  12  -1   -0.72    0.53 
  -1  12  -1    1.12    0.50 
  -1  12  -1    0.45    0.34 
   1  12   1   -0.15    0.55 
  -1  12  -1    0.39    0.44 
   1  12   1    0.54    0.54 
  -1  12  -1   -0.17    0.55 
  -1  12  -1    1.17    0.55 
  -1  12  -1    1.32    0.58 
  -1  12  -1   -0.23    0.61 
  -1  12  -1    0.82    0.57 
   1  12   1    1.08    0.58 
   1  12   1    0.97    0.72 
   1  12   1    0.42    0.46 
   2 -12   1    9.08    1.07 
   2 -12   1    8.19    1.16 
  -2 -12  -1    7.47    0.73 
   2 -12   1    7.53    1.11 
   2 -12   1    9.41    1.10 
   2 -12   1    9.00    1.16 
  -2 -12  -1    7.33    1.11 
   2 -12   1    8.41    1.10 
   2 -12   1    9.15    1.10 
  -2  12  -1    8.61    1.20 
  -2  12  -1    7.52    0.94 
   2  12   1    5.04    0.93 
   2  12   1    7.40    0.93 
  -2  12  -1    9.45    1.32 
  -2  12  -1    8.84    1.19 
  -2  12  -1    7.66    0.98 
   2  12   1    7.96    0.82 
   2  12   1    6.85    0.98 
   2  12   1    6.87    0.78 
   2  12   1    6.67    0.90 
  -2  12  -1    7.92    1.06 
   2  12   1    8.14    0.93 
  -2  12  -1    6.51    0.97 
   2  12   1    8.24    1.00 
  -2  12  -1    5.86    0.98 
   3 -12   1   14.84    1.50 
   3 -12   1   18.08    1.51 
   3 -12   1   12.92    1.37 
   3 -12   1   12.55    1.43 
   3 -12   1   13.37    1.50 
   3 -12   1   13.54    1.51 
  -3 -12  -1   12.59    1.50 
   3 -12   1   12.43    1.36 
  -3  12  -1   13.63    1.44 
  -3  12  -1   13.13    1.51 
   3  12   1   13.70    1.31 
  -3  12  -1   21.60    1.64 
  -3  12  -1   14.72    1.45 
   3  12   1   13.41    1.21 
  -3  12  -1   15.01    1.74 
  -3  12  -1   14.64    1.39 
  -3  12  -1   15.76    1.52 
   3  12   1   14.19    1.23 
  -3  12  -1   16.16    1.57 
   3  12   1   14.44    0.86 
   3  12   1   14.36    1.17 
   3  12   1   12.61    1.27 
   3  12   1   14.30    0.87 
  -4 -12  -1    3.03    0.97 
   4 -12   1    2.76    0.85 
   4 -12   1    4.34    1.11 
   4 -12   1    2.87    0.88 
   4 -12   1    2.01    0.92 
   4 -12   1    4.99    1.11 
   4 -12   1    2.66    0.75 
   4 -12   1    5.77    1.09 
   4  12   1    3.76    0.72 
   4  12   1    3.72    0.78 
  -4  12  -1    5.14    0.99 
  -4  12  -1    4.98    1.17 
  -4  12  -1    3.04    0.88 
   4  12   1    5.93    0.94 
   4  12   1    3.00    0.65 
   4  12   1    3.95    0.65 
  -5 -12  -1    0.92    0.97 
   5 -12   1    1.25    0.84 
   5 -12   1    0.30    0.74 
   5 -12   1    1.17    0.87 
   5 -12   1    1.27    0.80 
   5 -12   1    0.67    0.61 
   5 -12   1    2.67    0.98 
   5 -12   1    1.06    1.03 
   5  12   1    0.84    0.33 
  -5  12  -1    0.96    0.72 
   5  12   1    0.46    0.45 
   5  12   1    0.57    0.46 
   5  12   1    0.92    0.64 
   5  12   1    0.74    0.35 
   5  12   1    0.86    0.46 
   6 -12   1    0.48    0.65 
   6 -12   1    0.56    0.65 
   6 -12   1    0.92    0.80 
   6 -12   1    1.90    0.98 
   6 -12   1    0.73    0.91 
  -6 -12  -1   -0.37    0.87 
   6  12   1   -0.04    0.33 
  -6  12  -1   -1.00    0.52 
   6  12   1    0.30    0.41 
  -6  12  -1    0.03    0.89 
   6  12   1    0.50    0.70 
   6  12   1    0.05    0.26 
  -7 -12  -1    4.03    1.45 
   7 -12   1    0.35    0.71 
   7 -12   1    1.39    0.91 
   7 -12   1    2.22    1.23 
   7 -12   1    4.24    1.26 
   7  12   1    0.72    0.51 
   7  12   1    0.69    0.31 
  -7  12  -1    1.98    0.91 
   7 -13  -1    5.67    1.39 
  -7 -13   1    2.42    1.14 
   7 -13  -1    5.55    1.46 
   7 -13  -1    4.66    1.48 
   7 -13  -1    3.87    1.28 
  -7  13   1    5.25    1.51 
   7  13  -1    3.83    0.45 
  -7  13   1    6.94    1.58 
   6 -13  -1    2.69    1.10 
   6 -13  -1    0.43    0.66 
   6 -13  -1    1.73    0.84 
  -6 -13   1    0.54    0.94 
   6 -13  -1    2.99    1.08 
   6  13  -1    1.22    0.32 
   6  13  -1    1.21    0.46 
   6  13  -1    1.60    0.40 
  -6  13   1    1.62    0.98 
  -6  13   1    0.26    0.83 
  -6  13   1    1.48    1.00 
   5 -13  -1    2.94    1.01 
   5 -13  -1    3.89    1.11 
  -5 -13   1    4.48    1.22 
   5 -13  -1    2.67    0.95 
   5 -13  -1    1.73    0.83 
   5 -13  -1    3.27    0.97 
   5 -13  -1    1.85    0.75 
  -5  13   1    5.05    1.20 
   5  13  -1    3.10    0.88 
   5  13  -1    2.57    0.62 
  -5  13   1    3.15    1.11 
   5  13  -1    1.20    0.50 
   5  13  -1    2.83    0.51 
   5  13  -1    2.36    0.49 
   5  13  -1    2.06    0.61 
   4 -13  -1   24.62    2.04 
  -4 -13   1   20.72    2.09 
   4 -13  -1   23.27    1.96 
   4 -13  -1   23.21    2.04 
  -4 -13   1   23.46    1.30 
   4 -13  -1   25.59    2.21 
   4 -13  -1   25.46    2.03 
   4 -13  -1   24.29    2.07 
  -4  13   1   22.79    1.90 
   4  13  -1   22.03    1.59 
   4  13  -1   21.89    1.62 
   4  13  -1   23.23    1.52 
  -4  13   1   21.13    2.00 
  -4  13   1   18.23    1.96 
   4  13  -1   19.57    1.54 
  -4  13   1   31.78    2.18 
   4  13  -1   21.29    1.66 
   3 -13  -1    4.48    0.84 
   3 -13  -1    4.58    1.08 
   3 -13  -1    3.58    0.82 
   3 -13  -1    3.36    0.92 
   3 -13  -1    4.20    1.12 
  -3 -13   1    3.35    0.99 
   3 -13  -1    2.75    0.98 
  -3  13   1    4.23    0.91 
  -3  13   1    2.88    0.91 
  -3  13   1    2.48    1.02 
   3  13  -1    3.17    0.77 
  -3  13   1    3.48    1.05 
   3  13  -1    2.81    0.77 
  -3  13   1    5.23    1.14 
  -3  13   1    6.98    1.09 
   3  13  -1    3.74    0.70 
  -3  13   1    3.18    0.72 
   3  13  -1    3.68    0.84 
  -3  13   1    3.25    1.04 
   3  13  -1    3.03    0.41 
   3  13  -1    3.54    0.45 
   3  13  -1    4.15    0.86 
  -2 -13   1    2.82    1.02 
   2 -13  -1    2.32    0.90 
   2 -13  -1    5.29    1.07 
   2 -13  -1    4.24    1.07 
  -2 -13   1    4.45    0.68 
   2 -13  -1    4.05    0.82 
   2 -13  -1    3.69    0.83 
  -2 -13   1    3.79    0.70 
   2 -13  -1    3.74    0.83 
  -2  13   1    4.30    0.99 
   2  13  -1    3.57    0.84 
  -2  13   1    3.61    1.05 
  -2  13   1    3.53    1.04 
  -2  13   1    3.23    1.07 
   2  13  -1    2.95    0.63 
   2  13  -1    3.88    0.95 
  -2  13   1    6.28    0.95 
  -2  13   1    5.81    0.91 
   2  13  -1    3.89    1.02 
  -2  13   1    3.88    0.95 
   2  13  -1    3.83    0.80 
  -2  13   1    3.42    0.98 
   2  13  -1    3.93    0.68 
   2  13  -1    3.89    0.84 
  -1 -13   1   15.25    1.52 
  -1 -13   1   13.94    1.17 
   1 -13  -1   15.17    1.21 
   1 -13  -1   13.90    1.45 
  -1 -13   1   15.92    1.19 
   1 -13  -1   12.30    1.17 
   1 -13  -1   12.63    1.39 
   1 -13  -1   13.55    1.44 
   1  13  -1   10.52    1.29 
   1  13  -1   14.56    1.34 
  -1  13   1   11.77    1.41 
  -1  13   1   13.31    1.46 
  -1  13   1   15.72    1.47 
  -1  13   1   11.77    1.28 
   1  13  -1   11.76    1.14 
   1  13  -1   13.74    1.26 
  -1  13   1   13.80    1.40 
  -1  13   1   11.53    1.34 
   1  13  -1    9.98    1.33 
   1  13  -1   13.53    1.32 
  -1  13   1   12.24    1.24 
  -1  13   1   16.55    1.22 
   1  13  -1   12.17    1.47 
   0 -13  -1   35.68    2.01 
   0 -13  -1   37.07    2.10 
   0 -13   1   35.38    2.17 
   0 -13   1   33.32    2.31 
   0 -13   1   35.84    2.54 
   0 -13  -1   31.44    2.40 
   0 -13  -1   37.42    2.41 
   0 -13   1   38.48    2.16 
   0  13  -1   34.56    2.36 
   0  13  -1   31.05    2.42 
   0  13  -1   33.45    2.45 
   0  13   1   37.43    2.30 
   0  13   1   34.72    2.32 
   0  13   1   32.70    2.33 
   0  13   1   33.31    2.19 
   0  13  -1   35.13    2.24 
   0  13  -1   36.56    2.35 
   0  13  -1   34.09    2.12 
   0  13   1   36.06    2.48 
   0  13   1   30.17    2.39 
   0  13   1   33.14    2.29 
   0  13  -1   34.23    2.30 
  -1 -13  -1    5.72    0.71 
   1 -13   1    4.14    0.95 
   1 -13   1    3.60    0.75 
   1 -13   1    2.88    0.78 
   1 -13   1    2.47    1.11 
  -1 -13  -1    3.44    0.93 
   1 -13   1    4.50    0.98 
   1 -13   1    4.09    0.82 
  -1  13  -1    2.33    0.97 
  -1  13  -1    4.65    0.87 
  -1  13  -1    4.19    1.06 
   1  13   1    3.04    0.77 
  -1  13  -1    5.22    0.99 
  -1  13  -1    6.25    0.80 
  -1  13  -1    3.67    0.98 
  -1  13  -1    3.42    0.74 
   1  13   1    3.60    0.95 
   1  13   1    3.84    0.74 
   1  13   1    4.62    1.08 
   1  13   1    3.51    0.75 
   1  13   1    4.73    0.90 
   1  13   1    2.70    0.87 
  -1  13  -1    3.48    0.94 
   2 -13   1    0.82    0.61 
   2 -13   1    0.03    0.45 
   2 -13   1    0.83    0.61 
   2 -13   1    0.33    0.49 
   2 -13   1   -0.18    0.42 
   2 -13   1   -0.32    0.44 
   2 -13   1    0.12    0.52 
  -2 -13  -1    0.38    0.59 
   2  13   1    0.20    0.55 
  -2  13  -1    0.74    0.51 
   2  13   1   -0.03    0.56 
   2  13   1    0.51    0.53 
  -2  13  -1    1.29    0.84 
  -2  13  -1    0.92    0.81 
   2  13   1    0.25    0.50 
   2  13   1    1.27    0.48 
  -2  13  -1    1.39    0.82 
  -2  13  -1    0.90    0.73 
   2  13   1    0.44    0.57 
   2  13   1    0.46    0.49 
  -2  13  -1    0.91    0.77 
  -2  13  -1    0.64    0.67 
   3 -13   1    5.89    1.20 
   3 -13   1    5.26    1.15 
   3 -13   1    5.28    1.06 
   3 -13   1    5.62    0.96 
   3 -13   1    6.44    1.23 
  -3 -13  -1    4.68    1.07 
   3 -13   1    6.51    1.27 
   3 -13   1    6.79    0.99 
   3  13   1    5.67    0.56 
   3  13   1    3.41    0.81 
  -3  13  -1    6.51    1.07 
  -3  13  -1    6.18    1.01 
   3  13   1    4.46    0.84 
  -3  13  -1    6.67    1.20 
   3  13   1    5.94    0.58 
  -3  13  -1    6.25    1.21 
  -3  13  -1    5.58    1.25 
   3  13   1    4.90    0.94 
   3  13   1    4.10    0.82 
  -3  13  -1    3.63    1.18 
  -3  13  -1    6.55    1.24 
  -3  13  -1    6.71    0.99 
   3  13   1    4.63    0.93 
   4 -13   1   11.53    1.47 
  -4 -13  -1   10.35    1.50 
   4 -13   1   13.43    1.51 
   4 -13   1   12.68    1.48 
   4 -13   1   14.11    1.61 
   4 -13   1   10.68    1.32 
   4 -13   1   11.52    1.52 
   4 -13   1   12.34    1.56 
  -4  13  -1   11.83    1.45 
   4  13   1   13.01    1.34 
   4  13   1   11.28    1.13 
   4  13   1   11.83    1.19 
  -4  13  -1   13.38    1.53 
   4  13   1   14.37    1.13 
  -4  13  -1   13.04    1.37 
   4  13   1   11.87    1.16 
  -4  13  -1   14.66    1.65 
  -5 -13  -1    1.20    1.04 
   5 -13   1    0.81    0.89 
   5 -13   1    1.55    0.86 
   5 -13   1    1.17    0.90 
   5 -13   1    1.56    0.95 
   5 -13   1   -0.16    0.47 
   5  13   1    0.13    0.46 
   5  13   1    1.53    0.56 
   5  13   1    0.41    0.44 
  -5  13  -1    0.75    0.65 
   5  13   1    0.18    0.36 
   5  13   1    0.96    0.69 
  -5  13  -1    0.12    0.56 
   6 -13   1    0.68    0.72 
  -6 -13  -1    0.20    0.94 
   6 -13   1    0.77    0.71 
   6 -13   1    0.15    0.57 
   6 -13   1    0.17    0.62 
   6  13   1   -0.24    0.62 
  -6  13  -1    1.05    0.92 
   6  13   1    0.15    0.31 
   6  13   1    0.30    0.38 
   6  13   1    0.17    0.43 
   7 -13   1    0.99    0.97 
   7 -13   1    5.94    1.29 
  -7 -13  -1    2.52    1.31 
   7 -13   1    1.57    1.11 
   7 -13   1    3.11    1.25 
  -7  13  -1    2.35    1.25 
  -7  13  -1    4.72    1.49 
   7  13   1    0.42    0.76 
   7  13   1    1.49    0.42 
   7 -14  -1   12.07    1.71 
   7 -14  -1   11.39    1.73 
   7 -14  -1   12.66    1.79 
   7 -14  -1   23.21    2.26 
  -7 -14   1   12.19    1.85 
   7  14  -1   12.82    0.92 
  -7  14   1   17.82    2.21 
  -7  14   1   12.75    1.90 
  -7  14   1   11.36    1.89 
   6 -14  -1   30.93    2.62 
  -6 -14   1   23.17    2.56 
   6 -14  -1   26.64    2.38 
   6 -14  -1   22.58    2.34 
   6 -14  -1   31.17    2.45 
  -6  14   1   24.08    2.38 
   6  14  -1   24.63    1.60 
  -6  14   1   27.26    2.39 
  -6  14   1   23.17    2.35 
   6  14  -1   22.17    1.46 
   5 -14  -1    5.59    1.36 
   5 -14  -1    5.13    1.35 
  -5 -14   1    5.66    1.42 
   5 -14  -1    4.88    1.05 
   5 -14  -1    3.94    1.32 
   5 -14  -1    5.05    1.29 
   5 -14  -1    2.90    1.12 
   5  14  -1    3.63    0.79 
   5  14  -1    3.14    0.76 
  -5  14   1    4.29    1.26 
  -5  14   1    4.60    1.21 
  -5  14   1    5.65    1.37 
   5  14  -1    3.87    0.76 
   5  14  -1    4.40    0.64 
   4 -14  -1    7.82    1.33 
   4 -14  -1    7.12    1.47 
   4 -14  -1    6.87    1.11 
   4 -14  -1    6.18    1.06 
  -4 -14   1    5.14    1.23 
   4 -14  -1    9.98    1.50 
   4 -14  -1    7.85    1.37 
  -4  14   1    8.62    1.39 
  -4  14   1    8.42    1.29 
   4  14  -1    7.24    0.90 
  -4  14   1    8.94    1.43 
   4  14  -1    4.92    0.93 
   4  14  -1    6.77    0.96 
  -4  14   1   15.50    1.61 
   4  14  -1    7.65    1.03 
   3 -14  -1   55.09    3.35 
  -3 -14   1   56.16    3.71 
   3 -14  -1   56.25    3.48 
   3 -14  -1   57.60    3.64 
   3 -14  -1   60.84    3.57 
   3 -14  -1   57.38    3.51 
   3 -14  -1   58.79    3.44 
  -3  14   1   54.25    3.57 
  -3  14   1   58.49    3.71 
   3  14  -1   56.82    3.16 
  -3  14   1   56.30    3.50 
  -3  14   1   56.65    3.36 
  -3  14   1   54.32    3.54 
   3  14  -1   59.49    3.17 
   3  14  -1   53.25    3.08 
   3  14  -1   59.73    3.30 
   3  14  -1   54.38    2.64 
   3  14  -1   54.72    3.07 
  -3  14   1   56.05    3.49 
  -3  14   1   53.82    3.29 
   2 -14  -1    4.38    0.88 
   2 -14  -1    4.00    0.87 
  -2 -14   1    3.86    1.12 
   2 -14  -1    3.50    1.01 
   2 -14  -1    3.42    0.92 
   2  14  -1    4.53    0.96 
  -2  14   1    2.56    0.84 
   2  14  -1    4.16    0.92 
   2  14  -1    2.71    0.67 
  -2  14   1    3.20    0.87 
  -2  14   1    4.15    0.88 
   2  14  -1    3.54    0.69 
  -2  14   1    2.63    0.99 
   2  14  -1    3.97    0.97 
  -2  14   1    3.51    1.18 
  -2  14   1    2.82    0.90 
  -2  14   1    3.74    1.06 
   2  14  -1    2.39    0.83 
  -2  14   1    5.16    1.18 
   2  14  -1    4.18    0.91 
  -2  14   1    4.53    0.99 
  -1 -14   1    1.92    0.75 
   1 -14  -1    2.46    0.81 
  -1 -14   1    2.86    0.63 
   1 -14  -1    3.10    0.64 
   1 -14  -1    1.82    0.88 
  -1 -14   1    1.76    0.62 
   1 -14  -1    1.66    0.71 
   1  14  -1    2.31    0.81 
  -1  14   1    1.94    0.77 
   1  14  -1    3.00    0.73 
   1  14  -1    2.11    0.69 
  -1  14   1    1.79    0.84 
  -1  14   1    1.47    0.67 
   1  14  -1    1.92    0.82 
  -1  14   1    1.71    0.76 
   1  14  -1    1.56    0.71 
  -1  14   1    1.97    0.73 
   1  14  -1    1.74    0.69 
   1  14  -1    1.77    0.81 
  -1  14   1    1.14    0.81 
  -1  14   1    3.67    0.71 
  -1  14   1    1.44    0.87 
   0 -14  -1    2.10    0.87 
   0 -14   1    2.10    0.78 
   0 -14  -1    1.59    0.58 
   0 -14   1    1.04    0.57 
   0 -14  -1    1.92    0.54 
   0 -14   1    1.40    0.54 
   0  14  -1    2.38    0.87 
   0  14  -1    1.37    0.79 
   0  14  -1    1.42    0.87 
   0  14   1    1.03    0.65 
   0  14   1    1.01    0.65 
   0  14  -1    1.52    0.78 
   0  14   1    1.05    0.62 
   0  14  -1    2.46    0.76 
   0  14   1    0.82    0.63 
   0  14  -1    0.89    0.57 
   0  14  -1    0.87    0.78 
   0  14   1    0.71    0.55 
   0  14   1    1.33    0.83 
   0  14   1    1.56    0.77 
  -1 -14  -1    0.92    0.82 
   1 -14   1    1.61    0.62 
   1 -14   1    2.50    0.88 
   1 -14   1    2.62    0.76 
   1 -14   1    1.93    0.77 
   1  14   1    2.08    0.80 
   1  14   1    2.12    0.84 
  -1  14  -1    1.39    0.88 
   1  14   1    1.05    0.72 
  -1  14  -1    2.99    0.96 
  -1  14  -1    1.52    0.82 
   1  14   1    2.23    0.75 
  -1  14  -1    1.37    0.82 
  -1  14  -1    2.38    0.69 
  -1  14  -1    2.88    0.66 
  -1  14  -1    1.53    0.84 
   1  14   1    2.23    0.74 
   1  14   1    1.47    0.79 
   1  14   1    2.14    0.71 
  -1  14  -1    1.95    0.78 
   2 -14   1    3.70    1.02 
  -2 -14  -1    2.03    0.85 
   2 -14   1    3.09    0.87 
   2 -14   1    3.97    0.95 
   2 -14   1    2.82    0.92 
   2 -14   1    2.79    0.88 
   2  14   1    2.63    0.67 
  -2  14  -1    3.26    0.98 
   2  14   1    2.44    0.79 
   2  14   1    3.54    0.86 
   2  14   1    2.80    0.91 
  -2  14  -1    3.57    1.17 
  -2  14  -1    1.93    0.98 
   2  14   1    3.33    0.90 
  -2  14  -1    3.75    1.10 
  -2  14  -1    3.93    0.94 
  -2  14  -1    3.41    0.81 
   2  14   1    0.95    0.73 
  -2  14  -1    3.52    0.95 
  -2  14  -1    3.30    1.05 
   2  14   1    3.00    0.81 
   3 -14   1    2.61    0.93 
   3 -14   1    2.26    0.84 
   3 -14   1    2.36    0.86 
   3 -14   1    1.74    0.72 
   3 -14   1    4.05    1.21 
   3 -14   1    4.07    0.97 
  -3 -14  -1    2.86    1.12 
   3 -14   1    4.29    1.14 
   3  14   1    2.68    0.77 
   3  14   1    3.10    0.81 
  -3  14  -1    5.57    1.07 
  -3  14  -1    2.47    0.87 
  -3  14  -1    0.85    0.64 
  -3  14  -1    4.33    0.98 
  -3  14  -1    2.15    0.93 
  -3  14  -1    3.49    1.09 
  -3  14  -1    3.04    1.11 
   3  14   1    2.51    0.51 
   3  14   1    2.14    0.52 
   3  14   1    2.00    0.75 
   3  14   1    2.48    0.84 
   3  14   1    2.68    0.82 
  -4 -14  -1    0.47    0.71 
   4 -14   1   -0.14    0.53 
   4 -14   1   -0.26    0.69 
   4 -14   1    0.44    0.55 
   4 -14   1    1.00    0.91 
   4 -14   1    0.95    0.84 
   4 -14   1    0.22    0.58 
   4 -14   1    0.29    0.58 
   4  14   1    0.64    0.58 
   4  14   1    0.17    0.49 
   4  14   1   -0.04    0.53 
  -4  14  -1    0.30    0.77 
  -4  14  -1    0.53    0.68 
   4  14   1    0.41    0.69 
  -4  14  -1    2.01    0.96 
   4  14   1    0.91    0.54 
   5 -14   1    0.73    0.78 
   5 -14   1    1.54    0.80 
   5 -14   1    0.91    0.82 
  -5 -14  -1    1.01    1.06 
   5 -14   1    2.38    0.94 
   5 -14   1    1.30    0.81 
   5  14   1    1.28    0.79 
   5  14   1    0.87    0.48 
   5  14   1    1.00    0.57 
  -5  14  -1    1.50    0.88 
  -5  14  -1    2.69    1.17 
   5  14   1    1.41    0.59 
   5  14   1    0.63    0.55 
  -5  14  -1    1.97    1.01 
  -6 -14  -1   10.44    1.82 
   6 -14   1    8.89    1.44 
   6 -14   1   10.15    1.55 
   6 -14   1   10.29    1.82 
   6 -14   1    9.22    1.48 
   6 -14   1    9.94    1.75 
  -6  14  -1   11.55    1.75 
   6  14   1    9.62    0.95 
  -6  14  -1    9.12    1.61 
  -6  14  -1    9.86    1.44 
   6  14   1    8.60    0.93 
   6  14   1    8.87    0.99 
   6 -15  -1    1.28    0.94 
   6 -15  -1    0.65    1.02 
   6 -15  -1   -0.13    0.64 
  -6 -15   1    1.55    1.33 
   6 -15  -1    0.55    0.95 
   6  15  -1    0.31    0.45 
  -6  15   1   -0.46    0.55 
   6  15  -1   -0.23    0.33 
  -6  15   1    0.72    0.95 
   6  15  -1    0.11    0.38 
  -6  15   1    1.70    1.19 
   5 -15  -1    6.79    1.56 
   5 -15  -1    7.29    1.26 
   5 -15  -1    8.04    1.29 
   5 -15  -1    4.70    1.34 
   5 -15  -1    6.00    1.40 
  -5 -15   1    7.01    1.46 
   5 -15  -1    5.99    1.39 
  -5  15   1    7.50    1.52 
  -5  15   1    8.08    1.51 
   5  15  -1    6.22    0.98 
   5  15  -1    7.01    0.92 
   5  15  -1    7.30    0.81 
  -5  15   1    7.66    1.35 
   5  15  -1    6.25    0.97 
  -4 -15   1   15.58    1.90 
   4 -15  -1   13.09    1.62 
   4 -15  -1   14.08    1.71 
   4 -15  -1   11.82    1.56 
   4 -15  -1   12.61    1.57 
   4 -15  -1   15.40    1.75 
   4  15  -1   12.92    1.21 
  -4  15   1   14.44    1.82 
   4  15  -1   11.47    1.27 
  -4  15   1   15.48    1.65 
  -4  15   1   13.66    1.65 
  -4  15   1   14.82    1.78 
   4  15  -1   15.09    1.44 
   4  15  -1   11.70    1.29 
  -3 -15   1    0.31    0.68 
   3 -15  -1    0.28    0.64 
   3 -15  -1    1.43    0.84 
   3 -15  -1    1.20    0.68 
   3 -15  -1   -0.12    0.82 
  -3  15   1    0.79    0.73 
  -3  15   1   -0.77    0.53 
  -3  15   1    1.02    0.71 
  -3  15   1   -1.17    0.73 
   3  15  -1   -0.49    0.53 
  -3  15   1   -0.33    0.75 
  -3  15   1    0.04    0.69 
   3  15  -1    0.32    0.64 
   3  15  -1    1.11    0.68 
   3  15  -1   -0.72    0.53 
   3  15  -1   -0.26    0.31 
   2 -15  -1    1.37    0.72 
   2 -15  -1    0.13    0.80 
   2 -15  -1   -0.40    0.67 
  -2 -15   1    0.25    0.52 
   2 -15  -1    0.07    0.54 
   2  15  -1   -0.61    0.44 
  -2  15   1    0.43    0.65 
   2  15  -1   -0.49    0.55 
  -2  15   1    0.48    0.62 
  -2  15   1    0.22    0.86 
  -2  15   1   -0.20    0.83 
   2  15  -1   -0.61    0.53 
  -2  15   1   -0.26    0.54 
   2  15  -1    0.46    0.70 
   2  15  -1    1.21    0.75 
  -2  15   1    0.79    0.87 
  -2  15   1    0.42    0.66 
  -2  15   1    0.68    0.90 
   2  15  -1    0.31    0.54 
   1 -15  -1   22.93    1.69 
  -1 -15   1   18.35    1.89 
   1 -15  -1   22.13    1.63 
   1 -15  -1   25.32    2.19 
  -1 -15   1   20.18    1.81 
  -1  15   1   20.20    1.99 
  -1  15   1   22.96    1.49 
   1  15  -1   18.19    1.89 
  -1  15   1   20.29    1.68 
  -1  15   1   17.43    1.78 
   1  15  -1   18.28    1.68 
   1  15  -1   20.14    1.59 
  -1  15   1   18.86    1.94 
  -1  15   1   20.13    2.06 
  -1  15   1   18.14    1.84 
   1  15  -1   21.26    1.82 
   1  15  -1   20.04    1.79 
   1  15  -1   17.75    1.57 
  -1  15   1   20.16    1.92 
   1  15  -1   19.68    1.99 
   0 -15   1   35.02    2.21 
   0 -15  -1   33.46    2.54 
   0 -15   1   35.14    2.12 
   0 -15   1   28.44    2.40 
   0  15   1   32.31    2.24 
   0  15   1   34.84    2.54 
   0  15   1   29.97    2.48 
   0  15  -1   32.67    2.27 
   0  15  -1   30.77    2.21 
   0  15  -1   31.62    2.39 
   0  15   1   27.63    2.27 
   0  15   1   32.15    2.33 
   0  15  -1   27.83    2.42 
   0  15   1   33.57    2.43 
   0  15  -1   29.65    2.41 
   0  15   1   27.54    2.09 
   0  15  -1   27.67    2.26 
   0  15  -1   34.03    2.14 
   1 -15   1   18.91    1.51 
   1 -15   1   14.30    1.73 
  -1 -15  -1   16.73    1.76 
   1 -15   1   16.43    1.49 
  -1  15  -1   14.13    1.67 
  -1  15  -1   14.64    1.67 
  -1  15  -1   17.71    1.23 
   1  15   1   15.77    1.76 
   1  15   1   16.83    1.61 
  -1  15  -1   12.88    1.59 
  -1  15  -1   15.50    1.62 
   1  15   1   13.55    1.72 
   1  15   1   13.04    1.35 
  -1  15  -1   14.88    1.40 
  -1  15  -1   12.91    1.66 
   1  15   1   13.46    1.56 
   1  15   1   12.80    1.48 
  -1  15  -1   15.20    1.72 
   1  15   1   14.02    1.39 
   2 -15   1   -0.31    0.55 
   2 -15   1    1.33    0.81 
   2 -15   1   -0.27    0.78 
   2 -15   1    0.43    0.65 
  -2 -15  -1   -0.42    0.82 
  -2  15  -1    0.06    0.73 
  -2  15  -1    0.75    0.55 
   2  15   1    0.41    0.55 
   2  15   1    0.66    0.53 
  -2  15  -1    0.79    0.91 
   2  15   1    0.56    0.65 
   2  15   1    0.26    0.62 
   2  15   1   -0.02    0.63 
  -2  15  -1    0.97    0.73 
   2  15   1    0.87    0.58 
   2  15   1   -0.03    0.50 
  -2  15  -1    0.21    0.88 
  -2  15  -1   -0.95    0.49 
  -2  15  -1    0.82    0.97 
  -3 -15  -1   21.85    2.31 
   3 -15   1   21.22    1.97 
   3 -15   1   21.44    2.10 
   3 -15   1   21.79    1.96 
   3 -15   1   22.22    2.05 
  -3  15  -1   24.69    2.06 
   3  15   1   20.59    1.67 
   3  15   1   21.46    1.81 
  -3  15  -1   16.87    1.87 
  -3  15  -1   24.90    2.09 
   3  15   1   24.81    1.83 
   3  15   1   19.44    1.70 
  -3  15  -1   19.61    1.77 
   3  15   1   23.74    1.91 
  -3  15  -1   20.82    1.85 
   4 -15   1   12.68    1.58 
   4 -15   1   10.29    1.39 
   4 -15   1   10.96    1.42 
   4 -15   1   11.00    1.59 
  -4 -15  -1    9.80    1.79 
  -4  15  -1    8.85    1.37 
   4  15   1    7.63    1.17 
  -4  15  -1    8.17    1.27 
   4  15   1   10.17    1.23 
  -4  15  -1   10.04    1.43 
   4  15   1    7.26    1.10 
   4  15   1    7.75    1.04 
   4  15   1    6.90    1.07 
  -4  15  -1   10.01    1.47 
   5 -15   1   11.83    1.68 
   5 -15   1   14.23    1.95 
   5 -15   1   10.83    1.65 
   5 -15   1   10.49    1.50 
   5 -15   1   12.05    1.61 
  -5 -15  -1   10.77    1.67 
  -5  15  -1    9.10    1.61 
  -5  15  -1   12.06    1.60 
   5  15   1   10.59    1.03 
  -5  15  -1   10.80    1.53 
   5  15   1    8.90    1.10 
   5  15   1   10.29    1.20 
   5  15   1    9.31    1.16 
   6 -15   1    0.52    1.05 
   6 -15   1    0.50    0.93 
  -6 -15  -1    0.24    0.80 
   6 -15   1    0.13    0.95 
   6 -15   1    0.61    0.77 
   6 -15   1   -0.09    0.92 
  -6  15  -1   -1.12    0.70 
   6  15   1   -0.31    0.41 
   6  15   1   -0.60    0.39 
  -6  15  -1    2.34    1.29 
   6  15   1   -0.25    0.44 
  -6  15  -1   -0.58    0.87 
   6 -16  -1   41.09    3.31 
   6 -16  -1   49.11    3.53 
   6 -16  -1   45.63    3.50 
  -6 -16   1   39.63    3.57 
  -6  16   1   42.27    3.35 
  -6  16   1   40.93    3.22 
   6  16  -1   38.77    2.38 
  -6  16   1   45.22    3.30 
   6  16  -1   38.09    2.29 
   6  16  -1   40.41    2.32 
   5 -16  -1    7.09    1.32 
   5 -16  -1    8.49    1.51 
  -5 -16   1    7.18    1.53 
   5 -16  -1    6.01    1.39 
  -5  16   1    4.20    1.25 
   5  16  -1    4.57    0.94 
  -5  16   1    5.75    1.32 
  -5  16   1    7.01    1.52 
   5  16  -1    5.39    0.79 
   5  16  -1    6.19    0.96 
   5  16  -1    4.72    0.90 
   4 -16  -1    3.47    1.09 
   4 -16  -1    4.81    1.32 
   4 -16  -1    5.96    1.24 
   4 -16  -1    5.16    1.09 
  -4 -16   1    4.36    1.36 
  -4  16   1    4.85    1.33 
  -4  16   1    5.13    1.40 
   4  16  -1    3.37    0.92 
   4  16  -1    3.78    0.98 
  -4  16   1    3.80    1.10 
  -4  16   1    4.32    1.44 
   4  16  -1    3.76    0.94 
   4  16  -1    5.35    0.89 
   3 -16  -1    1.93    0.94 
   3 -16  -1    3.52    1.01 
   3 -16  -1    1.93    0.81 
  -3 -16   1    3.68    1.22 
   3 -16  -1    2.87    1.02 
   3  16  -1    2.38    0.86 
  -3  16   1    4.06    1.08 
   3  16  -1    2.57    0.55 
  -3  16   1    3.22    1.09 
   3  16  -1    1.93    0.81 
   3  16  -1    0.57    0.73 
  -3  16   1    3.17    1.09 
   3  16  -1    2.82    0.96 
  -3  16   1    3.64    1.20 
   2 -16  -1   50.33    2.91 
   2 -16  -1   37.85    2.95 
  -2 -16   1   37.08    3.03 
   2  16  -1   33.67    2.66 
  -2  16   1   42.97    3.15 
  -2  16   1   41.83    2.78 
   2  16  -1   42.24    2.91 
  -2  16   1   43.87    3.14 
   2  16  -1   45.12    2.52 
  -2  16   1   37.82    2.94 
   2  16  -1   37.23    3.06 
  -2  16   1   45.99    3.07 
  -2  16   1   46.84    3.05 
   2  16  -1   42.18    2.73 
  -2  16   1   43.05    2.63 
  -2  16   1   43.41    2.97 
   2  16  -1   40.62    2.69 
  -1 -16   1    7.61    1.32 
   1 -16  -1    9.13    1.13 
   1 -16  -1    8.11    1.33 
  -1  16   1    7.43    1.24 
  -1  16   1    5.31    1.02 
   1  16  -1    7.52    1.31 
  -1  16   1    9.77    1.43 
   1  16  -1    8.70    1.15 
  -1  16   1    8.22    1.50 
  -1  16   1    9.98    1.52 
  -1  16   1    9.75    0.96 
   1  16  -1    7.86    1.29 
   1  16  -1    9.27    1.31 
  -1  16   1    7.50    1.22 
  -1  16   1    7.93    1.37 
   1  16  -1    6.80    1.22 
   1  16  -1    8.95    1.42 
   0 -16  -1   -0.31    0.56 
   0 -16   1    1.97    0.97 
   0 -16   1    0.88    0.70 
   0  16  -1    1.06    0.86 
   0  16  -1   -0.08    0.73 
   0  16  -1    1.56    0.88 
   0  16   1   -0.20    0.48 
   0  16   1    1.31    0.91 
   0  16   1    1.51    0.69 
   0  16   1    0.15    0.75 
   0  16   1   -0.61    0.72 
   0  16  -1    0.86    0.66 
   0  16   1   -0.29    0.75 
   0  16   1    0.35    0.75 
   0  16  -1    0.98    0.92 
   0  16  -1    0.46    0.72 
   1 -16   1   11.95    1.36 
   1 -16   1   12.16    1.32 
  -1 -16  -1   10.91    1.55 
   1 -16   1   13.26    1.59 
  -1  16  -1   13.22    1.52 
  -1  16  -1   12.48    1.63 
   1  16   1   11.51    1.38 
  -1  16  -1   12.94    1.28 
  -1  16  -1   14.63    1.75 
   1  16   1   13.38    1.53 
   1  16   1   12.29    1.57 
   1  16   1   11.00    1.32 
  -1  16  -1   13.47    1.73 
  -1  16  -1   13.80    1.56 
  -1  16  -1   10.77    1.50 
  -1  16  -1   14.46    1.32 
   1  16   1   16.00    1.47 
   1  16   1   12.87    1.67 
   1  16   1    8.75    1.39 
   2 -16   1   18.48    1.76 
   2 -16   1   20.03    1.80 
  -2 -16  -1   15.68    2.08 
   2 -16   1   19.64    1.89 
  -2  16  -1   14.37    1.87 
  -2  16  -1   19.12    1.66 
   2  16   1   16.83    1.65 
  -2  16  -1   19.02    2.00 
  -2  16  -1   17.11    1.98 
  -2  16  -1   19.95    1.81 
  -2  16  -1   17.49    1.56 
   2  16   1   16.65    1.76 
   2  16   1   16.29    1.84 
   2  16   1   17.99    1.70 
   2  16   1   17.62    1.47 
   2  16   1   13.56    1.61 
   2  16   1   19.84    1.63 
  -2  16  -1   14.32    1.98 
  -2  16  -1   15.13    1.86 
   3 -16   1    4.86    1.35 
   3 -16   1    3.86    1.10 
  -3 -16  -1    1.96    0.98 
   3 -16   1    4.58    0.95 
   3 -16   1    5.35    1.29 
   3  16   1    2.40    0.87 
  -3  16  -1    3.96    1.27 
  -3  16  -1    3.41    1.13 
  -3  16  -1    3.13    0.92 
   3  16   1    2.84    0.96 
   3  16   1    3.77    0.99 
   3  16   1    2.45    0.56 
   3  16   1    2.19    0.88 
  -3  16  -1    2.50    1.06 
   4 -16   1    0.07    0.49 
  -4 -16  -1   -1.24    0.89 
   4 -16   1    0.24    0.85 
   4 -16   1   -0.18    0.72 
   4 -16   1    1.06    0.81 
  -4  16  -1    0.69    0.74 
  -4  16  -1   -0.30    0.59 
   4  16   1   -0.65    0.43 
   4  16   1   -0.25    0.59 
  -4  16  -1    0.26    0.79 
  -4  16  -1   -1.09    0.76 
   4  16   1   -0.55    0.56 
   4  16   1   -0.42    0.56 
   5 -16   1    1.52    1.03 
   5 -16   1    0.97    1.03 
   5 -16   1    3.09    1.19 
  -5 -16  -1    2.79    1.26 
  -5  16  -1    1.04    1.04 
   5  16   1    1.16    0.63 
  -5  16  -1    1.83    1.15 
  -5  16  -1    1.94    0.92 
   5  16   1    2.16    0.67 
   5  16   1    0.96    0.65 
   5  16   1    1.38    0.71 
  -5 -17   1   18.31    2.24 
   5 -17  -1   19.52    2.02 
   5 -17  -1   19.24    2.10 
   5  17  -1   17.80    1.57 
  -5  17   1   18.62    1.99 
  -5  17   1   15.95    1.99 
   5  17  -1   15.88    1.32 
   5  17  -1   15.31    1.47 
  -5  17   1   14.62    2.06 
   5  17  -1   18.26    1.61 
   4 -17  -1    5.60    1.44 
   4 -17  -1    6.58    1.54 
  -4 -17   1    3.87    1.30 
   4 -17  -1    7.48    1.42 
   4 -17  -1    5.61    1.26 
  -4  17   1    6.50    1.29 
   4  17  -1    5.42    1.00 
   4  17  -1    5.10    1.04 
  -4  17   1    2.97    1.27 
   4  17  -1    7.15    1.18 
   4  17  -1    5.23    0.94 
   3 -17  -1   15.91    1.94 
   3 -17  -1   14.02    1.63 
   3 -17  -1   14.57    1.64 
   3 -17  -1   12.05    1.73 
  -3 -17   1   11.79    1.77 
   3  17  -1   10.77    1.41 
  -3  17   1   14.12    1.72 
  -3  17   1   12.32    1.55 
  -3  17   1   14.39    1.57 
   3  17  -1    9.97    1.49 
  -3  17   1   16.45    1.92 
   3  17  -1   12.75    0.99 
   3  17  -1   14.01    1.57 
   3  17  -1   16.42    1.57 
  -2 -17   1   -0.47    0.55 
   2 -17  -1    0.39    0.77 
   2 -17  -1   -0.66    0.73 
   2  17  -1    0.31    0.57 
  -2  17   1   -0.78    0.53 
   2  17  -1   -0.58    0.68 
  -2  17   1    0.36    0.61 
  -2  17   1    0.76    0.92 
   2  17  -1   -0.07    0.67 
   2  17  -1    0.38    0.75 
  -2  17   1   -0.30    0.64 
  -2  17   1    0.42    0.95 
   2  17  -1   -0.54    0.79 
  -2  17   1   -0.51    0.63 
  -2  17   1   -1.12    0.83 
   2  17  -1    0.46    0.82 
  -2  17   1   -0.67    0.60 
   1 -17  -1   40.79    3.11 
  -1 -17   1   36.73    3.03 
  -1  17   1   34.08    2.98 
   1  17  -1   33.79    2.58 
  -1  17   1   37.48    2.73 
   1  17  -1   35.64    2.80 
   1  17  -1   33.79    2.66 
  -1  17   1   40.32    2.88 
  -1  17   1   39.28    2.59 
  -1  17   1   36.84    2.71 
  -1  17   1   38.68    2.89 
   1  17  -1   37.87    2.67 
   1  17  -1   34.93    2.46 
   1  17  -1   33.83    2.92 
  -1  17   1   35.73    2.85 
   0 -17  -1   23.07    2.34 
   0 -17   1   24.65    2.38 
   0  17   1   21.29    2.11 
   0  17   1   24.37    2.01 
   0  17  -1   21.06    2.09 
   0  17   1   23.55    2.30 
   0  17   1   25.11    2.05 
   0  17  -1   21.16    1.94 
   0  17   1   20.37    2.10 
   0  17  -1   20.15    1.95 
   0  17   1   24.36    1.90 
   0  17  -1   17.84    1.82 
   0  17  -1   25.62    2.18 
   0  17  -1   19.90    2.22 
   0  17   1   21.37    2.07 
  -1 -17  -1   12.21    1.88 
   1 -17   1   14.69    1.90 
   1 -17   1   14.42    1.50 
   1  17   1   12.95    1.52 
   1  17   1   14.15    1.78 
  -1  17  -1   17.94    1.89 
  -1  17  -1   13.73    1.67 
   1  17   1   10.96    1.63 
   1  17   1   14.07    1.54 
   1  17   1   12.19    1.67 
  -1  17  -1   17.18    1.95 
   1  17   1   12.75    1.59 
  -1  17  -1   13.51    1.94 
  -1  17  -1   12.96    1.61 
  -1  17  -1   14.91    1.66 
   2 -17   1    1.50    0.84 
  -2 -17  -1    1.68    0.96 
   2 -17   1    1.01    0.74 
   2 -17   1    0.25    0.83 
  -2  17  -1    0.59    0.94 
  -2  17  -1   -0.10    0.83 
   2  17   1    1.64    0.87 
  -2  17  -1   -0.85    0.95 
  -2  17  -1    0.79    0.79 
  -2  17  -1    0.58    1.00 
   2  17   1    1.88    0.90 
   2  17   1   -0.02    0.69 
   2  17   1    1.56    1.11 
  -2  17  -1    1.37    0.94 
  -2  17  -1   -0.13    0.61 
   2  17   1    0.83    0.84 
   2  17   1    0.49    0.61 
   3 -17   1    9.53    1.40 
  -3 -17  -1    7.58    1.51 
   3 -17   1    7.23    1.33 
   3 -17   1    9.39    1.51 
   3 -17   1   10.52    1.51 
  -3  17  -1    7.64    1.35 
  -3  17  -1    6.34    1.50 
   3  17   1    7.37    1.32 
  -3  17  -1    8.88    1.61 
   3  17   1    7.52    1.23 
   3  17   1    7.66    0.81 
   3  17   1    8.70    1.31 
   3  17   1    7.07    1.26 
  -3  17  -1    7.30    1.28 
  -4 -17  -1    5.46    1.66 
   4 -17   1   13.48    1.63 
   4 -17   1   10.16    1.72 
   4 -17   1    7.46    1.47 
   4 -17   1    9.82    1.54 
   4  17   1    7.00    1.07 
   4  17   1    8.17    1.24 
  -4  17  -1    9.66    1.68 
   4  17   1    7.65    1.25 
  -4  17  -1    9.22    1.35 
  -4  17  -1    7.32    1.46 
   4  17   1    7.19    1.25 
  -5 -17  -1    3.59    1.36 
   5 -17   1    5.00    1.43 
   5 -17   1    5.71    1.53 
   5 -17   1    3.84    1.25 
   5  17   1    3.34    0.85 
  -5  17  -1    3.51    1.39 
  -5  17  -1    6.15    1.59 
   5  17   1    3.16    0.88 
  -5  17  -1    5.89    1.45 
   5  17   1    4.31    1.01 
   5  17   1    4.45    0.85 
   4 -18  -1    0.75    0.79 
  -4 -18   1   -1.01    0.62 
   4 -18  -1    1.29    1.03 
   4 -18  -1    0.23    0.79 
  -4  18   1    0.05    0.94 
  -4  18   1    0.06    0.67 
   4  18  -1    0.46    0.60 
   4  18  -1   -0.29    0.63 
   4  18  -1    0.34    0.63 
   4  18  -1   -0.08    0.64 
  -4  18   1   -1.42    0.54 
   3 -18  -1   17.13    2.60 
  -3 -18   1   11.36    1.86 
   3 -18  -1   19.48    2.19 
   3  18  -1   15.19    1.12 
   3  18  -1   17.39    1.80 
   3  18  -1   16.05    1.60 
  -3  18   1   21.93    1.89 
   3  18  -1   16.98    1.72 
  -3  18   1   23.89    2.30 
   3  18  -1   15.92    1.78 
  -3  18   1   16.09    1.93 
  -3  18   1   18.47    1.85 
  -2 -18   1   27.87    2.71 
   2 -18  -1   34.73    2.94 
   2  18  -1   31.43    2.43 
  -2  18   1   30.56    2.76 
   2  18  -1   28.91    2.33 
   2  18  -1   28.68    2.49 
   2  18  -1   26.78    2.32 
  -2  18   1   31.26    2.88 
  -2  18   1   30.82    2.09 
   2  18  -1   29.31    2.03 
   2  18  -1   31.45    2.74 
  -2  18   1   29.11    2.70 
  -2  18   1   33.89    2.78 
  -2  18   1   30.04    2.61 
  -1 -18   1   13.93    1.96 
   1 -18  -1   10.88    1.64 
   1  18  -1   11.93    1.68 
   1  18  -1   14.98    1.88 
  -1  18   1   10.02    1.73 
   1  18  -1   12.93    1.63 
   1  18  -1   15.71    1.80 
  -1  18   1   12.82    1.82 
  -1  18   1   13.59    1.65 
  -1  18   1   13.40    1.70 
   1  18  -1   15.56    1.59 
   1  18  -1   14.06    1.73 
  -1  18   1   12.35    1.70 
  -1  18   1    9.39    1.78 
   0 -18   1    1.33    0.89 
   0 -18  -1    4.29    1.22 
   0  18  -1    2.65    1.02 
   0  18  -1    1.33    0.89 
   0  18  -1    2.99    1.15 
   0  18   1    3.85    1.25 
   0  18   1    3.83    1.15 
   0  18  -1    3.59    1.21 
   0  18   1    2.20    1.05 
   0  18  -1    2.47    1.16 
   0  18  -1    2.69    1.17 
   0  18   1    4.26    1.29 
   0  18   1    4.82    1.38 
   0  18   1    2.94    1.16 
  -1 -18  -1    3.00    1.25 
   1 -18   1    2.69    1.13 
   1  18   1    4.38    1.11 
  -1  18  -1    3.37    1.22 
  -1  18  -1    3.26    1.23 
   1  18   1    3.13    1.08 
   1  18   1    3.17    1.21 
  -1  18  -1    3.13    1.19 
  -1  18  -1    2.78    1.24 
  -1  18  -1    2.26    1.14 
   1  18   1    3.70    1.15 
  -1  18  -1    4.98    1.39 
   1  18   1    4.46    1.46 
   1  18   1    4.42    1.23 
   2 -18   1   16.21    1.74 
   2 -18   1   16.84    1.90 
  -2 -18  -1   13.37    1.88 
   2  18   1   11.78    1.57 
  -2  18  -1   15.93    2.11 
  -2  18  -1   14.30    1.83 
   2  18   1   15.27    2.04 
   2  18   1   12.19    1.68 
   2  18   1   14.96    1.73 
  -2  18  -1   15.32    1.85 
   2  18   1   16.32    1.47 
  -2  18  -1   13.97    1.74 
  -2  18  -1   15.10    1.38 
   2  18   1   13.35    1.69 
  -2  18  -1   18.07    2.00 
  -3 -18  -1   -0.62    0.65 
   3 -18   1   -0.23    0.74 
   3 -18   1    0.53    0.64 
  -3  18  -1    0.21    1.08 
   3  18   1    0.56    0.78 
  -3  18  -1    0.23    1.01 
   3  18   1    0.69    0.75 
  -3  18  -1    1.77    0.89 
   3  18   1    0.52    0.81 
   3  18   1   -0.89    0.54 
   3  18   1   -0.35    0.39 
   4 -18   1    0.09    0.83 
   4 -18   1   -0.67    0.60 
   4 -18   1   -0.14    0.87 
  -4 -18  -1    0.44    0.93 
   4 -18   1   -1.08    0.51 
  -4  18  -1    1.02    1.07 
   4  18   1   -0.68    0.58 
   4  18   1   -0.06    0.65 
   4  18   1    0.76    0.73 
   4  18   1    0.78    0.63 
  -4  18  -1   -0.26    0.93 
  -3 -19   1    5.61    1.57 
  -3  19   1    6.53    1.42 
  -3  19   1    9.41    1.39 
   3  19  -1    9.65    1.40 
   3  19  -1    7.19    0.74 
  -3  19   1   11.43    1.82 
   3  19  -1   10.18    1.39 
   3  19  -1    9.53    1.38 
   3  19  -1    8.05    1.35 
  -2 -19   1    0.02    0.75 
   2 -19  -1   -0.13    0.57 
   2  19  -1    3.27    1.01 
   2  19  -1    0.97    0.62 
  -2  19   1    2.65    1.23 
  -2  19   1    3.53    1.33 
   2  19  -1   -0.19    0.71 
   2  19  -1    0.88    1.09 
  -1 -19   1   12.10    1.83 
   1 -19  -1   11.76    1.95 
  -1  19   1   20.44    2.31 
   1  19  -1   12.39    1.85 
  -1  19   1   14.46    1.79 
  -1  19   1   15.22    1.97 
   1  19  -1   15.40    1.80 
  -1  19   1   12.49    1.69 
   1  19  -1    8.95    1.79 
   1  19  -1   11.71    1.73 
  -1  19   1   10.71    1.87 
   1  19  -1   15.56    1.85 
   0 -19   1   10.02    1.68 
   0 -19  -1   13.17    2.01 
   0  19  -1   12.75    1.78 
   0  19   1   13.79    1.99 
   0  19   1   12.98    1.82 
   0  19  -1   14.04    1.97 
   0  19   1   14.30    1.68 
   0  19  -1   10.75    1.69 
   0  19   1   18.39    2.12 
   0  19   1   13.24    1.86 
   0  19  -1   13.82    1.91 
   0  19   1   15.12    1.84 
   0  19  -1   13.53    1.65 
   0  19  -1   15.25    1.93 
  -1 -19  -1    2.27    1.09 
   1 -19   1    5.49    1.29 
  -1  19  -1    6.57    1.64 
   1  19   1    4.94    1.08 
   1  19   1    4.41    1.31 
  -1  19  -1    6.13    1.54 
   1  19   1    4.09    1.32 
  -1  19  -1    6.08    1.30 
  -1  19  -1    7.82    1.70 
   1  19   1    9.32    1.61 
  -1  19  -1    5.48    1.25 
   1  19   1    4.74    1.39 
  -1  19  -1    6.04    1.39 
   1  19   1    4.74    1.30 
  -2 -19  -1   -0.43    0.93 
   2 -19   1    1.57    1.09 
   2  19   1    1.81    0.85 
  -2  19  -1    1.50    0.95 
  -2  19  -1    1.71    1.12 
   2  19   1    1.23    0.89 
   2  19   1    0.59    0.77 
   3 -19   1   20.78    2.31 
  -3 -19  -1   21.24    2.56 
   3  19   1   16.59    1.70 
  -3  19  -1   16.17    1.70 
  -3  19  -1   16.85    2.23 
  -3  19  -1   26.15    2.45 
   3  19   1   13.82    1.69 
   3  19   1   14.69    1.73 
   3  19   1   17.82    1.21 
   3  19   1   17.79    1.95 
   1 -20  -1   -0.78    0.81 
  -1 -20   1    0.93    0.84 
  -1  20   1    1.55    1.18 
   1  20  -1    1.57    0.94 
   1  20  -1    1.50    1.01 
  -1  20   1   -0.89    0.91 
  -1  20   1    2.97    1.24 
  -1  20   1    2.45    1.29 
  -1  20   1    1.01    0.96 
   1  20  -1    0.47    0.89 
   1  20  -1   -0.01    0.77 
   1  20  -1    1.79    0.83 
   0 -20  -1    3.51    1.49 
   0 -20   1    4.95    1.56 
   0  20   1    7.65    1.61 
   0  20   1    5.38    1.37 
   0  20  -1    5.82    1.58 
   0  20  -1    2.33    1.35 
   0  20  -1    3.89    1.23 
   0  20   1    3.10    1.26 
   0  20  -1    7.02    1.72 
   1 -20   1    3.83    1.49 
  -1 -20  -1    8.85    1.81 
   1  20   1    4.87    1.41 
   1  20   1    2.49    1.32 
  -1  20  -1    4.14    1.39 
  -1  20  -1    3.34    1.21 
   1  20   1   10.39    1.67 
   1  20   1    6.25    1.51 
   1  20   1    2.65    1.00 
   9   0  -2    0.46    0.34 
   9   0  -2    0.97    0.42 
   9   0  -2    1.66    0.84 
   9   0  -2    0.50    0.27 
  -9   0   2    0.94    0.97 
   9   0  -2   -0.67    0.65 
  -8   0   2   32.52    2.68 
   8   0  -2   29.66    2.44 
   8   0  -2   30.84    1.69 
   8   0  -2   29.57    1.57 
   8   0  -2   28.78    1.59 
   8   0  -2   28.89    2.37 
   7   0  -2   33.76    1.76 
   7   0  -2   30.83    2.42 
   7   0  -2   32.42    1.71 
  -7   0   2   32.19    2.55 
   7   0  -2   31.47    2.02 
   7   0  -2   33.19    2.39 
   7   0  -2   33.94    1.71 
   6   0  -2   91.98    4.26 
   6   0  -2   97.16    4.26 
  -6   0   2   94.65    4.98 
   6   0  -2  100.12    4.29 
   6   0  -2   88.91    4.86 
   6   0  -2   97.38    4.93 
   6   0  -2   98.49    4.61 
   5   0  -2    3.78    0.68 
   5   0  -2    4.04    0.44 
   5   0  -2    3.62    0.79 
   5   0  -2    2.69    0.57 
   5   0  -2    3.49    0.42 
   5   0  -2    3.50    0.43 
   4   0  -2  156.29    6.48 
   4   0  -2  153.65    6.53 
   4   0  -2  162.76    7.01 
   4   0  -2  143.41    6.94 
   4   0  -2  155.56    6.79 
   4   0  -2  147.74    6.52 
   4   0  -2  157.61    6.54 
   3   0  -2   93.50    3.97 
   3   0  -2   91.65    3.87 
   3   0  -2   93.64    4.19 
   3   0  -2   93.35    4.30 
   3   0  -2   88.51    3.96 
   3   0  -2   92.21    3.97 
   3   0  -2   96.42    4.32 
   3   0  -2   92.98    3.94 
   2   0  -2   96.37    4.05 
   2   0  -2   89.23    4.24 
   2   0  -2   93.37    4.26 
  -2   0   2   97.90    4.05 
   2   0  -2   96.34    4.03 
   2   0  -2   95.50    4.05 
   2   0  -2   97.70    4.05 
  -2   0   2   98.68    4.25 
  -2   0   2   94.75    4.01 
  -2   0   2   98.46    4.09 
   2   0  -2   94.05    4.07 
   2   0  -2   93.56    4.04 
   2   0  -2   98.49    4.01 
  -2   0   2   95.49    4.06 
   2   0  -2   94.60    4.21 
  -2   0   2   94.38    4.05 
  -1   0   2   66.07    2.84 
   1   0  -2   64.53    2.79 
  -1   0   2   66.25    2.78 
   1   0  -2   64.72    2.75 
   1   0  -2   68.14    2.89 
   1   0  -2   66.37    2.79 
   1   0  -2   65.92    2.79 
   1   0  -2   66.78    2.89 
  -1   0   2   67.37    2.89 
  -1   0   2   66.26    2.78 
  -1   0   2   64.61    2.81 
   1   0  -2   63.54    2.81 
   1   0  -2   63.63    2.77 
  -1   0   2   68.82    2.80 
  -1   0   2   66.55    2.79 
   1   0  -2   62.08    2.87 
   1   0  -2   65.33    2.79 
   1   0  -2   68.31    2.88 
  -1   0   2   63.72    2.78 
   1   0  -2   65.85    2.78 
  -1   0   2   63.24    2.88 
  -1   0   2   63.29    2.79 
  -1   0   2   64.49    2.88 
  -1   0   2   62.63    2.76 
   0   0  -2  461.21   17.82 
   0   0   2  452.32   17.83 
   0   0  -2  431.64   17.85 
   0   0   2  427.73   17.79 
   0   0   2  440.72   17.82 
   0   0  -2  401.60   17.81 
   0   0  -2  456.36   17.95 
   0   0   2  448.23   17.87 
   0   0   2  418.05   17.83 
   0   0   2  455.95   17.85 
   0   0  -2  425.99   17.83 
   0   0  -2  427.04   17.81 
   0   0  -2  411.57   17.84 
   0   0  -2  419.99   17.79 
   0   0   2  439.49   17.84 
   0   0  -2  415.62   17.83 
   0   0   2  446.85   17.88 
   0   0   2  385.27   17.82 
   0   0   2  426.70   17.83 
   0   0   2  442.37   17.87 
   0   0   2  430.48   17.85 
   0   0  -2  447.63   17.83 
   1   0   2  800.18   32.54 
   1   0   2  797.03   32.51 
  -1   0  -2  798.91   32.53 
  -1   0  -2  790.69   32.53 
  -1   0  -2  766.98   32.50 
  -1   0  -2  785.54   32.57 
   1   0   2  807.82   32.52 
   1   0   2  790.61   32.56 
  -1   0  -2  771.73   32.58 
   1   0   2  803.33   32.50 
  -1   0  -2  768.97   32.59 
  -1   0  -2  809.49   32.50 
   1   0   2  734.61   32.49 
  -1   0  -2  811.64   32.55 
  -1   0  -2  776.87   32.53 
   1   0   2  794.06   32.52 
   1   0   2  795.96   32.50 
   1   0   2  789.88   32.51 
   1   0   2  812.38   32.51 
  -1   0  -2  782.92   32.49 
  -1   0  -2  802.88   32.50 
   1   0   2  798.34   32.50 
   1   0   2  810.33   32.49 
  -1   0  -2  789.60   32.58 
  -1   0  -2  774.19   32.47 
  -1   0  -2  774.42   32.52 
  -2   0  -2 1000.00   37.85 
   2   0   2  932.53   38.09 
   2   0   2  923.16   37.96 
  -2   0  -2  918.05   37.85 
   2   0   2  917.17   37.95 
   2   0   2  903.34   37.95 
   2   0   2  912.52   38.12 
   2   0   2  905.97   37.89 
   2   0   2  904.90   37.96 
  -2   0  -2  915.08   37.96 
   2   0   2  896.80   37.94 
   2   0   2  936.31   38.07 
   2   0   2  910.83   37.96 
   2   0   2  912.17   37.97 
  -2   0  -2  926.49   37.97 
  -2   0  -2  936.22   37.95 
   3   0   2  500.15   20.82 
  -3   0  -2  490.77   20.84 
   3   0   2  512.58   20.88 
   3   0   2  499.93   20.70 
   3   0   2  490.11   21.08 
   3   0   2  504.54   20.87 
   3   0   2  506.12   20.87 
   3   0   2  505.68   21.08 
   3   0   2  498.00   20.88 
  -3   0  -2  524.17   20.79 
   3   0   2  496.26   20.84 
  -3   0  -2  504.00   20.88 
   4   0   2  376.46   15.81 
   4   0   2  364.25   15.46 
   4   0   2  375.10   15.43 
   4   0   2  380.88   15.80 
   4   0   2  365.38   15.47 
   4   0   2  355.28   15.83 
   4   0   2  370.47   15.49 
   4   0   2  378.40   15.39 
   4   0   2  356.69   15.45 
   5   0   2  124.18    5.45 
   5   0   2  120.58    5.46 
   5   0   2  131.63    5.94 
   5   0   2  123.49    5.86 
   5   0   2  128.13    5.29 
   5   0   2  117.40    5.90 
   5   0   2  120.00    5.37 
   5   0   2  120.99    5.44 
   5   0   2  120.69    5.47 
   6   0   2    0.45    0.64 
   6   0   2    0.10    0.52 
   6   0   2   -0.01    0.31 
   6   0   2   -0.08    0.14 
   6   0   2    0.27    0.58 
   6   0   2    0.08    0.28 
   6   0   2    0.60    0.35 
   6   0   2    0.09    0.31 
   6   0   2   -0.32    0.27 
   6   0   2   -0.43    0.29 
   7   0   2   99.13    5.34 
   7   0   2   98.54    4.61 
   7   0   2  105.92    5.36 
   7   0   2  101.43    5.34 
   7   0   2   98.11    4.65 
   7   0   2  102.18    4.70 
   8   0   2   56.71    3.71 
   8   0   2   60.22    2.96 
   8   0   2   64.14    3.77 
   8   0   2   56.33    2.98 
   9   0   2    0.59    0.45 
   9   0   2   -0.36    0.48 
   9   0   2    0.21    0.82 
   9   0   2   -0.19    0.39 
   9  -1  -2   15.53    1.20 
  -9  -1   2   13.33    1.80 
   9  -1  -2   15.71    1.99 
   9  -1  -2   17.92    1.92 
   9  -1  -2   17.50    1.15 
   9   1  -2   16.50    1.95 
  -9   1   2   13.69    1.87 
   9   1  -2   16.15    0.97 
   9   1  -2   14.90    1.77 
  -8  -1   2   10.94    1.70 
   8  -1  -2   10.18    1.40 
   8  -1  -2   10.40    0.92 
   8  -1  -2    6.76    1.39 
   8  -1  -2    8.84    0.91 
   8   1  -2    9.78    1.48 
   8   1  -2    9.30    1.32 
  -8   1   2    9.54    1.45 
   8   1  -2   11.32    0.80 
   8   1  -2   11.00    0.78 
   7  -1  -2    0.26    0.50 
   7  -1  -2   -0.61    0.33 
   7  -1  -2   -0.56    0.41 
   7  -1  -2   -0.62    0.32 
   7  -1  -2    0.52    0.38 
   7  -1  -2   -0.88    0.49 
   7   1  -2   -0.14    0.21 
   7   1  -2   -0.53    0.43 
   7   1  -2   -0.30    0.25 
   7   1  -2    0.95    0.55 
   7   1  -2   -0.32    0.62 
  -7   1   2   -0.47    0.55 
   7   1  -2   -0.01    0.25 
   7   1  -2   -0.29    0.17 
   6  -1  -2   41.33    2.70 
   6  -1  -2   40.99    2.15 
   6  -1  -2   39.06    2.66 
   6  -1  -2   42.76    2.17 
   6  -1  -2   42.85    2.37 
   6  -1  -2   44.27    2.18 
   6   1  -2   39.48    2.64 
  -6   1   2   41.37    2.72 
   6   1  -2   41.06    2.40 
   6   1  -2   40.97    2.60 
   6   1  -2   44.42    1.98 
   6   1  -2   43.43    2.02 
   6   1  -2   43.85    1.96 
   5  -1  -2  203.32    8.80 
   5  -1  -2  199.57    8.73 
   5  -1  -2  215.06    8.82 
   5  -1  -2  204.41    8.62 
   5  -1  -2  199.35    8.80 
   5  -1  -2  206.54    8.62 
   5  -1  -2  204.30    9.00 
   5  -1  -2  196.44    9.29 
   5  -1  -2  206.35    9.33 
   5   1  -2  212.00    9.07 
   5   1  -2  205.10    8.65 
   5   1  -2  206.78    8.62 
  -5   1   2  206.29    9.35 
   5   1  -2  212.73    9.29 
   5   1  -2  207.51    9.28 
   5   1  -2  211.39    8.66 
   4  -1  -2   11.42    0.74 
   4  -1  -2   11.27    0.76 
   4  -1  -2   11.73    0.76 
   4  -1  -2   10.24    0.98 
   4  -1  -2   10.57    0.86 
   4  -1  -2    9.75    0.96 
   4  -1  -2   10.95    0.67 
   4  -1  -2   10.73    0.76 
   4   1  -2   12.51    0.65 
   4   1  -2   11.86    0.63 
   4   1  -2   12.03    0.64 
   4   1  -2   10.42    0.99 
   4   1  -2   12.08    1.00 
   4   1  -2   11.52    0.93 
  -4   1   2   10.53    1.00 
   3  -1  -2  188.78    8.09 
   3  -1  -2  194.61    8.39 
   3  -1  -2  186.41    8.37 
   3  -1  -2  192.68    8.24 
   3  -1  -2  189.08    8.13 
   3  -1  -2  188.18    8.04 
   3  -1  -2  187.31    8.07 
   3  -1  -2  184.14    8.07 
   3  -1  -2  188.11    8.09 
   3  -1  -2  189.76    8.10 
   3   1  -2  194.47    7.95 
   3   1  -2  195.27    8.36 
  -3   1   2  190.54    8.10 
   3   1  -2  196.85    7.95 
  -3   1   2  196.65    8.16 
  -3   1   2  191.53    8.09 
   3   1  -2  201.76    8.33 
   3   1  -2  193.56    7.95 
  -3   1   2  193.16    8.11 
   3   1  -2  194.96    8.35 
   3   1  -2  191.63    8.27 
  -3   1   2  191.26    8.08 
  -3   1   2  186.48    8.36 
   2  -1  -2  250.87   10.28 
   2  -1  -2  247.35   10.27 
   2  -1  -2  245.41   10.27 
   2  -1  -2  243.97   10.31 
   2  -1  -2  249.22   10.46 
   2  -1  -2  242.22   10.28 
   2  -1  -2  242.91   10.38 
   2  -1  -2  249.66   10.27 
   2  -1  -2  233.41   10.24 
   2  -1  -2  251.33   10.22 
   2   1  -2  241.04   10.15 
  -2   1   2  250.00   10.45 
  -2   1   2  245.20   10.32 
  -2   1   2  255.78   10.26 
  -2   1   2  242.38   10.28 
  -2   1   2  254.06   10.28 
   2   1  -2  243.00   10.43 
   2   1  -2  242.34   10.15 
   2   1  -2  247.88   10.15 
   2   1  -2  241.81   10.42 
   2   1  -2  246.99   10.15 
  -2   1   2  252.66   10.29 
   2   1  -2  245.35   10.40 
   2   1  -2  245.39   10.15 
  -1  -1   2   95.38    3.94 
   1  -1  -2   94.64    4.10 
  -1  -1   2   95.01    4.01 
   1  -1  -2   92.14    4.02 
   1  -1  -2   93.51    4.09 
   1  -1  -2   93.02    4.09 
  -1  -1   2   90.62    3.98 
   1  -1  -2  101.38    4.05 
  -1  -1   2   95.59    3.94 
  -1  -1   2   93.60    3.96 
   1  -1  -2   96.96    4.07 
  -1  -1   2   97.05    3.97 
  -1  -1   2   91.60    3.97 
  -1  -1   2   95.41    3.98 
  -1  -1   2   92.39    3.98 
  -1  -1   2   91.86    3.99 
   1  -1  -2  101.36    4.05 
   1  -1  -2   95.93    4.02 
  -1  -1   2   98.19    4.11 
   1  -1  -2   92.76    4.03 
  -1  -1   2   93.67    4.10 
   1  -1  -2   94.63    4.04 
   1  -1  -2   92.64    4.03 
  -1  -1   2   93.11    4.10 
   1  -1  -2   92.00    4.08 
  -1  -1   2   96.53    4.01 
   1   1  -2   98.14    3.97 
   1   1  -2   99.83    3.98 
  -1   1   2   90.34    4.03 
  -1   1   2   94.73    4.11 
  -1   1   2   94.24    4.03 
  -1   1   2   94.85    3.95 
  -1   1   2   95.42    4.04 
  -1   1   2   92.77    4.03 
  -1   1   2   93.57    4.04 
  -1   1   2   94.46    4.07 
   1   1  -2   93.67    4.00 
  -1   1   2   94.05    4.09 
  -1   1   2   92.75    4.02 
  -1   1   2   92.21    3.97 
   1   1  -2   99.46    3.98 
   1   1  -2   96.32    3.97 
   1   1  -2   93.78    4.10 
   1   1  -2   94.29    3.98 
  -1   1   2   93.18    4.09 
  -1   1   2   91.65    4.04 
   1   1  -2   97.45    3.98 
  -1   1   2   94.68    4.09 
   0  -1  -2   31.98    1.41 
   0  -1  -2   30.81    1.40 
   0  -1   2   32.11    1.47 
   0  -1   2   31.90    1.41 
   0  -1   2   29.43    1.37 
   0  -1   2   29.07    1.40 
   0  -1  -2   31.86    1.37 
   0  -1   2   30.17    1.33 
   0  -1  -2   29.98    1.40 
   0  -1  -2   29.21    1.41 
   0  -1   2   32.96    1.42 
   0  -1  -2   31.20    1.40 
   0  -1   2   29.74    1.41 
   0  -1   2   30.94    1.46 
   0  -1   2   30.13    1.36 
   0  -1   2   30.67    1.40 
   0  -1  -2   32.15    1.44 
   0  -1  -2   31.04    1.36 
   0  -1   2   29.93    1.46 
   0   1   2   30.32    1.41 
   0   1   2   30.41    1.36 
   0   1  -2   30.41    1.40 
   0   1  -2   28.98    1.45 
   0   1  -2   31.03    1.40 
   0   1   2   30.91    1.41 
   0   1   2   32.36    1.42 
   0   1   2   32.10    1.41 
   0   1   2   32.13    1.37 
   0   1   2   31.18    1.43 
   0   1  -2   27.24    1.39 
   0   1   2   30.58    1.44 
   0   1  -2   30.57    1.40 
   0   1   2   30.59    1.40 
   0   1  -2   30.85    1.33 
   0   1  -2   29.39    1.36 
   0   1   2   32.72    1.41 
   0   1  -2   29.52    1.38 
   0   1   2   29.86    1.40 
   0   1  -2   28.65    1.45 
   0   1   2   31.62    1.42 
   0   1  -2   30.56    1.40 
   0   1  -2   31.23    1.46 
   0   1   2   30.52    1.40 
   0   1  -2   30.67    1.37 
   0   1   2   33.40    1.36 
   0   1  -2   29.54    1.41 
   0   1  -2   28.42    1.39 
   0   1  -2   31.64    1.41 
   0   1  -2   32.01    1.41 
  -1  -1  -2  546.55   22.12 
   1  -1   2  521.00   22.14 
   1  -1   2  553.81   22.15 
  -1  -1  -2  552.65   22.11 
  -1  -1  -2  546.78   22.10 
   1  -1   2  548.96   22.21 
   1  -1   2  537.47   22.15 
  -1  -1  -2  550.33   22.11 
   1  -1   2  547.78   22.17 
  -1  -1  -2  527.76   22.13 
   1  -1   2  537.42   22.24 
   1  -1   2  533.80   22.16 
   1  -1   2  543.23   22.16 
   1  -1   2  537.85   22.07 
   1  -1   2  572.78   22.18 
   1  -1   2  529.75   22.15 
   1  -1   2  524.36   22.16 
  -1  -1  -2  546.47   22.12 
  -1  -1  -2  558.77   22.18 
  -1  -1  -2  543.50   22.12 
   1  -1   2  522.74   22.21 
   1  -1   2  542.74   22.18 
  -1   1  -2  515.87   22.17 
   1   1   2  551.55   22.22 
  -1   1  -2  500.60   22.15 
   1   1   2  548.02   22.13 
  -1   1  -2  511.00   22.25 
  -1   1  -2  501.34   22.11 
  -1   1  -2  526.33   22.15 
   1   1   2  551.14   22.10 
   1   1   2  531.93   22.10 
   1   1   2  541.86   22.13 
   1   1   2  562.03   22.13 
  -1   1  -2  528.19   22.18 
  -1   1  -2  509.64   22.16 
   1   1   2  548.12   22.09 
   1   1   2  505.08   22.11 
  -1   1  -2  516.66   22.15 
   1   1   2  538.55   22.12 
   1   1   2  536.08   22.13 
   1   1   2  535.97   22.13 
   1   1   2  555.45   22.11 
  -1   1  -2  542.00   22.15 
   1   1   2  515.58   22.16 
   2  -1   2  595.76   24.99 
  -2  -1  -2  625.88   24.93 
   2  -1   2  604.83   24.98 
  -2  -1  -2  596.65   24.94 
   2  -1   2  626.80   24.82 
  -2  -1  -2  608.34   24.92 
   2  -1   2  592.34   25.11 
   2  -1   2  605.35   25.13 
   2  -1   2  616.14   25.00 
   2  -1   2  593.68   25.12 
   2  -1   2  610.25   24.95 
   2  -1   2  612.23   25.00 
  -2  -1  -2  608.86   24.94 
   2  -1   2  627.13   25.02 
  -2  -1  -2  603.97   24.93 
   2   1   2  600.86   25.02 
   2   1   2  609.88   24.89 
   2   1   2  604.88   24.94 
  -2   1  -2  618.64   25.01 
  -2   1  -2  575.49   24.78 
   2   1   2  591.53   24.95 
   2   1   2  626.87   24.93 
   2   1   2  609.53   25.14 
   2   1   2  605.36   25.04 
   2   1   2  599.61   24.94 
   2   1   2  587.43   24.93 
  -2   1  -2  602.81   24.99 
  -2   1  -2  591.41   25.00 
   2   1   2  598.18   24.94 
   2   1   2  576.85   24.81 
   3  -1   2   75.42    3.47 
   3  -1   2   77.15    3.51 
   3  -1   2   74.69    3.66 
   3  -1   2   73.86    3.48 
   3  -1   2   75.74    3.69 
   3  -1   2   75.70    3.48 
   3  -1   2   74.94    3.48 
   3  -1   2   79.02    3.46 
  -3  -1  -2   79.91    3.46 
   3  -1   2   75.86    3.69 
   3  -1   2   80.06    3.31 
   3  -1   2   76.62    3.49 
   3  -1   2   75.94    3.38 
  -3   1  -2   80.25    3.48 
  -3   1  -2   77.75    3.31 
   3   1   2   75.41    3.37 
   3   1   2   76.65    3.59 
  -3   1  -2   77.94    3.51 
   3   1   2   78.44    3.41 
   3   1   2   77.53    3.43 
  -3   1  -2   75.63    3.49 
   3   1   2   76.60    3.61 
   3   1   2   75.91    3.41 
   3   1   2   74.90    3.68 
   3   1   2   76.92    3.41 
   3   1   2   76.64    3.42 
   3   1   2   78.91    3.33 
   4  -1   2    1.97    0.56 
   4  -1   2    1.70    0.36 
   4  -1   2    1.14    0.34 
   4  -1   2    1.76    0.29 
   4  -1   2    1.75    0.42 
   4  -1   2    1.93    0.38 
   4  -1   2    0.76    0.38 
   4  -1   2    1.77    0.42 
   4  -1   2    1.67    0.39 
   4  -1   2    1.40    0.51 
  -4   1  -2    1.08    0.38 
   4   1   2    1.70    0.34 
   4   1   2    1.28    0.31 
   4   1   2    1.66    0.44 
   4   1   2    1.90    0.24 
   4   1   2    1.48    0.55 
   4   1   2    1.42    0.32 
   4   1   2    1.98    0.31 
  -4   1  -2    1.48    0.61 
  -4   1  -2    1.86    0.45 
   4   1   2    1.83    0.53 
   4   1   2    1.84    0.37 
   4   1   2    1.15    0.30 
   5  -1   2   56.52    2.93 
   5  -1   2   60.85    2.86 
   5  -1   2   62.60    3.34 
   5  -1   2   62.01    2.99 
   5  -1   2   62.54    2.82 
   5  -1   2   58.94    2.94 
   5  -1   2   57.93    3.29 
   5  -1   2   59.88    2.98 
   5  -1   2   58.38    2.89 
   5  -1   2   57.78    3.33 
   5   1   2   66.54    2.94 
   5   1   2   64.21    3.31 
   5   1   2   63.81    2.78 
   5   1   2   62.47    2.90 
   5   1   2   59.76    3.32 
   5   1   2   59.36    2.55 
   5   1   2   63.75    2.86 
   5   1   2   59.98    2.88 
   5   1   2   59.64    3.22 
   5   1   2   61.28    2.86 
   6  -1   2  126.37    5.62 
   6  -1   2  132.23    5.75 
   6  -1   2  122.29    6.20 
   6  -1   2  127.29    5.69 
   6  -1   2  127.51    5.49 
   6  -1   2  123.18    5.71 
   6  -1   2  127.44    6.19 
   6  -1   2  122.91    5.68 
   6  -1   2  122.39    6.21 
   6   1   2  128.32    5.62 
   6   1   2  125.69    5.57 
   6   1   2  122.09    5.54 
   6   1   2  126.71    6.14 
   6   1   2  129.12    5.62 
   6   1   2  128.43    5.67 
   6   1   2  119.33    6.17 
   6   1   2  125.64    6.11 
   7  -1   2   28.86    2.22 
   7  -1   2   28.53    1.37 
   7  -1   2   30.98    1.79 
   7  -1   2   28.98    1.80 
   7  -1   2   25.23    2.23 
   7   1   2   30.70    2.22 
   7   1   2   29.58    1.74 
   7   1   2   27.36    2.19 
   7   1   2   30.54    1.69 
   7   1   2   30.74    1.65 
   7   1   2   30.80    1.72 
   7   1   2   30.47    2.27 
   8  -1   2   20.68    1.99 
   8  -1   2   24.06    1.59 
   8  -1   2   23.29    1.59 
   8  -1   2   22.11    2.13 
   8   1   2   23.55    1.40 
   8   1   2   24.01    1.47 
   8   1   2   24.69    2.17 
   8   1   2   23.85    2.15 
   9  -1   2   31.52    2.84 
   9  -1   2   31.77    2.07 
   9  -1   2   37.83    2.99 
   9  -1   2   35.88    2.16 
   9   1   2   36.78    2.04 
  -9   1  -2   36.77    3.19 
   9   1   2   36.65    1.82 
   9   1   2   36.17    2.77 
   9   1   2   40.13    2.98 
   9  -2  -2    0.57    0.84 
  -9  -2   2    0.86    0.91 
   9  -2  -2   -0.18    0.39 
   9  -2  -2    0.59    0.74 
   9  -2  -2    0.37    0.47 
   9   2  -2    0.68    0.86 
   9   2  -2    0.13    0.64 
  -9   2   2    0.66    0.91 
   8  -2  -2    3.79    0.74 
   8  -2  -2    4.64    0.77 
   8  -2  -2    4.28    1.03 
   8  -2  -2    3.98    1.11 
  -8   2   2    3.64    1.26 
   8   2  -2    5.01    1.00 
   8   2  -2    5.06    0.39 
   8   2  -2    5.01    0.41 
   8   2  -2    7.05    1.28 
   7  -2  -2   18.15    1.82 
   7  -2  -2   19.79    1.36 
   7  -2  -2   16.60    1.79 
   7  -2  -2   19.20    1.46 
   7  -2  -2   18.83    0.94 
   7  -2  -2   18.21    1.32 
   7  -2  -2   19.04    0.93 
   7   2  -2   22.79    1.03 
   7   2  -2   22.14    1.88 
   7   2  -2   20.19    1.81 
  -7   2   2   14.36    1.69 
   7   2  -2   21.83    1.04 
   7   2  -2   23.00    1.66 
   6  -2  -2   19.86    1.28 
   6  -2  -2   21.01    1.37 
   6  -2  -2   21.92    1.83 
   6  -2  -2   19.53    1.15 
   6  -2  -2   21.38    1.38 
   6  -2  -2   20.71    1.37 
   6  -2  -2   21.11    1.81 
   6  -2  -2   21.07    1.45 
   6   2  -2   23.27    1.08 
   6   2  -2   25.72    1.66 
   6   2  -2   22.03    1.70 
  -6   2   2   17.92    1.70 
   6   2  -2   22.63    1.07 
   6   2  -2   24.55    1.81 
   5  -2  -2    0.59    0.33 
   5  -2  -2    0.29    0.27 
   5  -2  -2    0.13    0.25 
   5  -2  -2    0.53    0.42 
   5  -2  -2    0.51    0.31 
   5  -2  -2    0.29    0.41 
   5  -2  -2    0.32    0.40 
   5  -2  -2    0.59    0.31 
   5   2  -2    0.04    0.14 
  -5   2   2   -0.18    0.54 
   5   2  -2    0.71    0.50 
   5   2  -2    0.28    0.36 
   5   2  -2    0.58    0.44 
   5   2  -2    0.54    0.46 
   5   2  -2    0.30    0.15 
   4  -2  -2   18.09    1.18 
   4  -2  -2   21.55    1.30 
   4  -2  -2   17.99    1.17 
   4  -2  -2   18.22    1.40 
   4  -2  -2   21.24    1.19 
   4  -2  -2   21.54    1.22 
   4  -2  -2   20.55    1.45 
   4   2  -2   23.16    1.47 
  -4   2   2   19.46    1.22 
   4   2  -2   22.41    0.93 
  -4   2   2   19.73    1.19 
  -4   2   2   16.70    1.38 
   4   2  -2   23.47    1.44 
   4   2  -2   21.01    1.37 
   4   2  -2   23.00    1.44 
   3  -2  -2   53.07    2.54 
   3  -2  -2   55.10    2.59 
   3  -2  -2   56.34    2.78 
   3  -2  -2   56.27    2.54 
   3  -2  -2   54.28    2.54 
   3  -2  -2   56.66    2.46 
   3  -2  -2   54.61    2.53 
   3  -2  -2   51.20    2.72 
   3  -2  -2   52.70    2.61 
   3  -2  -2   53.11    2.54 
   3   2  -2   54.81    2.69 
   3   2  -2   57.65    2.73 
  -3   2   2   53.65    2.55 
   3   2  -2   58.85    2.70 
  -3   2   2   52.10    2.59 
  -3   2   2   54.18    2.53 
  -3   2   2   54.87    2.54 
  -3   2   2   50.92    2.53 
   3   2  -2   55.26    2.66 
  -3   2   2   49.86    2.73 
   2  -2  -2    0.76    0.26 
   2  -2  -2    2.05    0.36 
   2  -2  -2    1.41    0.29 
   2  -2  -2    1.30    0.37 
   2  -2  -2    1.18    0.28 
   2  -2  -2    0.64    0.26 
   2  -2  -2    1.12    0.24 
   2  -2  -2    1.46    0.32 
   2  -2  -2    1.12    0.27 
   2  -2  -2    1.35    0.31 
  -2   2   2    1.10    0.17 
  -2   2   2    1.00    0.28 
   2   2  -2    1.86    0.31 
  -2   2   2    1.46    0.31 
   2   2  -2    1.59    0.31 
   2   2  -2    1.57    0.34 
  -2   2   2    1.21    0.30 
   2   2  -2    1.97    0.15 
   2   2  -2    1.49    0.29 
   2   2  -2    1.96    0.13 
  -2   2   2    1.92    0.44 
  -2   2   2    0.97    0.29 
  -2   2   2    0.95    0.28 
   2   2  -2    1.94    0.14 
   1  -2  -2    1.14    0.27 
   1  -2  -2    1.21    0.24 
   1  -2  -2    0.69    0.23 
   1  -2  -2    1.35    0.27 
  -1  -2   2    1.66    0.20 
   1  -2  -2    1.14    0.24 
  -1  -2   2    1.45    0.18 
   1  -2  -2    1.66    0.24 
   1  -2  -2    1.90    0.32 
   1  -2  -2    1.23    0.22 
  -1  -2   2    1.32    0.17 
  -1  -2   2    1.99    0.32 
   1  -2  -2    1.15    0.26 
  -1  -2   2    1.33    0.23 
  -1  -2   2    1.09    0.18 
  -1  -2   2    1.83    0.27 
   1  -2  -2    1.00    0.20 
  -1  -2   2    1.64    0.18 
   1  -2  -2    0.96    0.24 
  -1   2   2    0.92    0.24 
   1   2  -2    1.34    0.30 
  -1   2   2    1.10    0.25 
  -1   2   2    1.15    0.25 
  -1   2   2    1.02    0.25 
   1   2  -2    1.99    0.18 
   1   2  -2    1.22    0.13 
   1   2  -2    1.91    0.19 
  -1   2   2    0.96    0.27 
   1   2  -2    1.40    0.18 
   1   2  -2    1.40    0.19 
   1   2  -2    1.69    0.20 
  -1   2   2    0.83    0.23 
   1   2  -2    1.55    0.27 
   1   2  -2    1.34    0.12 
   1   2  -2    1.18    0.24 
   1   2  -2    1.51    0.19 
  -1   2   2    1.22    0.23 
  -1   2   2    0.99    0.26 
   1   2  -2    1.39    0.18 
   1   2  -2    1.86    0.26 
  -1   2   2    1.11    0.26 
  -1   2   2    1.21    0.23 
  -1   2   2    1.23    0.27 
   0  -2  -2  531.52   22.40 
   0  -2  -2  473.44   22.28 
   0  -2  -2  538.26   22.45 
   0  -2   2  560.05   22.38 
   0  -2  -2  504.48   22.48 
   0  -2   2  555.93   22.41 
   0  -2  -2  566.64   22.36 
   0  -2  -2  541.44   22.40 
   0  -2   2  566.11   22.43 
   0  -2  -2  550.02   22.42 
   0  -2   2  547.47   22.41 
   0  -2  -2  520.88   22.60 
   0  -2   2  555.18   22.47 
   0  -2   2  512.37   22.41 
   0  -2   2  554.68   22.40 
   0  -2  -2  476.38   22.39 
   0  -2   2  560.86   22.42 
   0  -2  -2  545.23   22.29 
   0  -2   2  571.78   22.42 
   0  -2   2  548.23   22.42 
   0  -2  -2  540.72   22.42 
   0  -2   2  540.89   22.42 
   0  -2  -2  558.32   22.46 
   0  -2   2  547.16   22.42 
   0  -2  -2  548.80   22.41 
   0  -2  -2  549.23   22.42 
   0  -2   2  541.64   22.49 
   0  -2   2  527.31   22.35 
   0  -2   2  535.63   22.48 
   0   2   2  557.85   22.41 
   0   2  -2  562.87   22.47 
   0   2   2  519.77   22.44 
   0   2  -2  575.58   22.51 
   0   2  -2  534.00   22.40 
   0   2  -2  541.46   22.41 
   0   2  -2  512.34   22.45 
   0   2  -2  537.26   22.36 
   0   2   2  559.51   22.46 
   0   2   2  555.83   22.46 
   0   2  -2  545.96   22.40 
   0   2  -2  561.19   22.42 
   0   2   2  536.70   22.42 
   0   2   2  572.63   22.29 
   0   2   2  550.72   22.41 
   0   2  -2  527.16   22.48 
   0   2   2  578.23   22.43 
   0   2  -2  555.17   22.42 
   0   2  -2  514.59   22.39 
   0   2   2  549.64   22.42 
   0   2   2  545.15   22.42 
   0   2  -2  583.40   22.43 
   0   2  -2  523.48   22.34 
   0   2   2  555.15   22.42 
   0   2  -2  538.45   22.31 
   0   2   2  517.97   22.38 
   0   2   2  547.49   22.29 
   0   2   2  529.27   22.34 
   0   2  -2  536.74   22.40 
  -1  -2  -2  594.70   24.02 
  -1  -2  -2  593.10   24.12 
  -1  -2  -2  594.58   24.11 
   1  -2   2  593.23   24.17 
   1  -2   2  593.98   24.24 
   1  -2   2  600.75   24.18 
  -1  -2  -2  587.38   24.12 
   1  -2   2  569.49   24.23 
   1  -2   2  554.79   24.17 
  -1  -2  -2  609.37   24.11 
   1  -2   2  545.14   24.25 
  -1  -2  -2  590.35   24.10 
   1  -2   2  593.95   24.19 
   1  -2   2  579.58   24.19 
  -1  -2  -2  587.42   24.17 
  -1  -2  -2  600.48   24.04 
   1  -2   2  580.60   24.17 
   1  -2   2  596.71   24.04 
   1  -2   2  592.14   24.16 
   1  -2   2  582.40   24.18 
   1  -2   2  582.24   24.25 
   1   2   2  580.45   24.12 
   1   2   2  589.15   24.07 
   1   2   2  585.23   24.18 
  -1   2  -2  589.61   24.28 
   1   2   2  594.25   24.13 
   1   2   2  582.83   24.11 
   1   2   2  582.30   24.12 
  -1   2  -2  610.39   24.34 
   1   2   2  581.60   24.23 
  -1   2  -2  558.60   24.16 
   1   2   2  583.13   24.11 
  -1   2  -2  551.10   24.21 
   1   2   2  563.32   24.15 
  -1   2  -2  571.86   24.30 
   1   2   2  588.58   24.03 
  -1   2  -2  578.46   24.17 
  -1   2  -2  578.77   24.15 
   1   2   2  594.97   24.09 
   1   2   2  584.23   24.09 
  -1   2  -2  596.58   24.19 
   1   2   2  582.32   24.01 
   1   2   2  587.06   24.11 
   2  -2   2    1.21    0.29 
   2  -2   2    1.29    0.16 
  -2  -2  -2    0.94    0.23 
   2  -2   2    1.09    0.36 
   2  -2   2    0.90    0.27 
   2  -2   2    1.33    0.31 
   2  -2   2    1.52    0.33 
   2  -2   2    1.25    0.31 
  -2  -2  -2    0.81    0.20 
  -2  -2  -2    0.91    0.22 
   2  -2   2    1.12    0.30 
  -2  -2  -2    0.67    0.24 
   2  -2   2    2.86    0.44 
   2  -2   2    1.43    0.36 
  -2  -2  -2    1.02    0.23 
   2  -2   2    0.93    0.27 
   2   2   2    0.78    0.23 
  -2   2  -2    1.16    0.30 
   2   2   2    1.08    0.25 
  -2   2  -2    1.39    0.17 
   2   2   2    0.86    0.19 
   2   2   2    0.51    0.21 
  -2   2  -2    1.39    0.32 
   2   2   2    0.78    0.21 
   2   2   2    0.96    0.23 
  -2   2  -2    1.43    0.27 
  -2   2  -2    1.17    0.28 
   2   2   2    0.79    0.20 
   2   2   2    1.59    0.38 
   2   2   2    0.91    0.22 
   2   2   2    1.08    0.24 
   2   2   2    0.79    0.21 
   3  -2   2  220.09    9.45 
  -3  -2  -2  228.52    9.46 
   3  -2   2  212.58    9.63 
   3  -2   2  217.71    9.63 
   3  -2   2  225.12    9.47 
   3  -2   2  210.99    9.44 
   3  -2   2  215.46    9.65 
   3  -2   2  211.45    9.46 
   3  -2   2  222.86    9.21 
   3  -2   2  223.11    9.39 
   3  -2   2  217.89    9.46 
   3   2   2  224.83    9.51 
  -3   2  -2  217.17    9.46 
  -3   2  -2  201.92    9.26 
   3   2   2  228.70    9.33 
   3   2   2  221.94    9.65 
   3   2   2  224.46    9.32 
   3   2   2  227.30    9.27 
   3   2   2  237.44    9.34 
   3   2   2  227.02    9.32 
  -3   2  -2  222.23    9.45 
   3   2   2  225.05    9.31 
   3   2   2  229.01    9.50 
  -3   2  -2  222.27    9.48 
  -3   2  -2  218.17    9.21 
   3   2   2  224.55    9.19 
   4  -2   2  109.48    5.03 
   4  -2   2  115.18    5.05 
  -4  -2  -2  113.39    5.06 
   4  -2   2  110.90    5.05 
   4  -2   2  113.27    5.03 
   4  -2   2  109.84    4.89 
   4  -2   2  109.46    5.30 
   4  -2   2  109.42    5.05 
   4  -2   2  113.05    4.99 
   4  -2   2  114.46    4.80 
   4  -2   2  114.14    5.33 
   4  -2   2  107.16    5.29 
  -4   2  -2  110.65    5.06 
   4   2   2  106.64    5.27 
   4   2   2  112.62    4.87 
   4   2   2  114.69    5.18 
  -4   2  -2  113.04    5.07 
   4   2   2  113.56    4.79 
   4   2   2  113.92    4.90 
   4   2   2  112.43    4.88 
   4   2   2  114.54    4.90 
   4   2   2  108.89    5.17 
  -4   2  -2  112.26    4.84 
  -4   2  -2  108.39    5.01 
   4   2   2  114.44    4.86 
   5  -2   2    8.76    1.03 
   5  -2   2    8.76    0.78 
   5  -2   2   11.18    0.93 
   5  -2   2   10.72    0.70 
   5  -2   2   10.54    1.07 
  -5  -2  -2   11.02    0.93 
   5  -2   2    9.69    0.86 
   5  -2   2   11.13    0.88 
   5  -2   2   10.18    1.07 
   5  -2   2    8.43    0.84 
   5  -2   2   11.19    0.93 
   5   2   2   12.89    0.78 
   5   2   2   10.86    0.61 
   5   2   2    8.45    0.67 
   5   2   2   10.25    1.03 
   5   2   2   10.31    0.72 
   5   2   2    9.98    0.75 
   5   2   2    9.67    1.01 
   5   2   2   10.69    0.77 
   5   2   2    6.86    0.92 
   6  -2   2    6.55    0.81 
  -6  -2  -2    8.91    0.93 
   6  -2   2    6.55    0.72 
   6  -2   2    6.66    1.12 
   6  -2   2    6.81    0.85 
   6  -2   2    7.37    0.78 
   6  -2   2    5.59    1.05 
   6  -2   2    6.74    0.80 
   6  -2   2    7.56    0.84 
   6   2   2   10.15    0.74 
   6   2   2    7.85    0.72 
   6   2   2    8.00    1.07 
   6   2   2    8.96    0.71 
   6   2   2    6.49    1.06 
   6   2   2    8.40    0.65 
   6   2   2    8.18    0.74 
   6   2   2    8.26    1.06 
   7  -2   2  115.08    5.04 
   7  -2   2  109.24    5.29 
   7  -2   2  110.64    5.91 
   7  -2   2  110.23    5.85 
   7  -2   2  109.60    5.28 
   7   2   2  111.58    5.75 
   7   2   2  112.75    5.04 
   7   2   2  113.71    4.98 
   7   2   2  114.58    5.02 
   7   2   2  113.99    5.91 
   7   2   2  117.66    5.12 
   7   2   2  118.98    5.84 
   8  -2   2   46.38    3.20 
   8  -2   2   46.27    2.63 
   8  -2   2   45.84    3.26 
   8  -2   2   43.02    2.58 
  -8   2  -2   39.31    3.23 
   8   2   2   49.21    3.12 
   8   2   2   48.70    2.24 
   8   2   2   43.60    3.21 
   8   2   2   50.04    3.17 
   8   2   2   48.51    2.36 
   8   2   2   47.61    2.22 
   9  -2   2    2.57    1.10 
   9  -2   2    0.93    0.56 
   9  -2   2    0.72    0.58 
   9  -2   2    2.16    1.10 
   9   2   2    1.81    0.97 
   9   2   2    1.40    0.42 
  -9   2  -2    0.68    1.25 
   9   2   2    2.27    1.07 
   9  -3  -2   13.56    1.22 
  -9  -3   2   14.11    1.98 
   9  -3  -2   10.10    1.75 
   9  -3  -2   11.40    1.76 
   9  -3  -2   11.68    1.22 
   9   3  -2   17.40    1.90 
   9   3  -2   12.69    1.74 
  -9   3   2    8.93    1.59 
   8  -3  -2    1.56    0.16 
   8  -3  -2    2.15    0.64 
   8  -3  -2    2.60    0.92 
   8  -3  -2    1.85    0.86 
   8  -3  -2    0.60    0.53 
  -8   3   2    2.12    1.04 
   8   3  -2    3.47    0.45 
   8   3  -2    4.19    1.12 
   8   3  -2    1.51    0.88 
   7  -3  -2    1.14    0.55 
   7  -3  -2    1.22    0.81 
   7  -3  -2    0.62    0.77 
   7  -3  -2    0.43    0.48 
   7  -3  -2    0.54    0.35 
   7  -3  -2    1.20    0.49 
   7  -3  -2   -0.29    0.30 
   7   3  -2    0.44    0.52 
   7   3  -2    0.10    0.60 
  -7   3   2   -0.16    0.85 
   7   3  -2   -0.31    0.51 
   6  -3  -2   28.78    1.72 
   6  -3  -2   30.90    1.82 
   6  -3  -2   27.45    1.73 
   6  -3  -2   30.92    2.16 
   6  -3  -2   28.16    2.09 
   6  -3  -2   27.77    1.57 
   6  -3  -2   26.39    1.69 
   6  -3  -2   30.16    1.70 
   6   3  -2   29.94    2.06 
   6   3  -2   28.42    1.89 
  -6   3   2   26.59    2.10 
   6   3  -2   27.62    2.01 
   6   3  -2   27.60    1.98 
   5  -3  -2   73.34    4.15 
   5  -3  -2   78.62    3.83 
   5  -3  -2   83.94    3.92 
   5  -3  -2   75.71    3.81 
   5  -3  -2   80.41    3.85 
   5  -3  -2   81.96    4.24 
   5  -3  -2   84.10    3.84 
   5   3  -2   85.29    4.13 
   5   3  -2   85.14    4.14 
   5   3  -2   87.97    4.14 
  -5   3   2   74.96    4.22 
   5   3  -2   85.72    4.05 
   4  -3  -2    4.14    0.73 
   4  -3  -2    4.52    0.57 
   4  -3  -2    4.12    0.54 
   4  -3  -2    4.29    0.47 
   4  -3  -2    4.57    0.60 
   4  -3  -2    4.42    0.56 
   4  -3  -2    3.25    0.61 
   4  -3  -2    4.32    0.54 
  -4   3   2    3.53    0.65 
   4   3  -2    4.38    0.68 
   4   3  -2    4.89    0.68 
   4   3  -2    4.45    0.64 
  -4   3   2    4.63    0.36 
  -4   3   2    3.71    0.59 
  -4   3   2    3.80    0.55 
   4   3  -2    4.07    0.64 
  -4   3   2    4.34    0.54 
  -4   3   2    5.06    0.61 
  -4   3   2    4.72    0.59 
   3  -3  -2    0.51    0.29 
   3  -3  -2    0.33    0.26 
   3  -3  -2    0.38    0.27 
   3  -3  -2    0.69    0.31 
   3  -3  -2    0.28    0.34 
   3  -3  -2    0.77    0.25 
   3  -3  -2    0.66    0.28 
   3  -3  -2    0.53    0.28 
   3  -3  -2    0.32    0.27 
   3  -3  -2    0.87    0.35 
   3   3  -2    0.35    0.31 
  -3   3   2    0.23    0.27 
  -3   3   2    0.49    0.29 
   3   3  -2    0.81    0.32 
  -3   3   2    0.53    0.22 
  -3   3   2    0.63    0.37 
  -3   3   2    0.28    0.32 
  -3   3   2    0.36    0.29 
   3   3  -2    1.16    0.33 
  -3   3   2    0.28    0.29 
   3   3  -2    0.46    0.28 
   2  -3  -2  181.60    7.74 
   2  -3  -2  175.98    7.68 
   2  -3  -2  180.44    7.76 
   2  -3  -2  167.74    7.44 
   2  -3  -2  173.83    7.67 
   2  -3  -2  186.67    7.67 
   2  -3  -2  183.02    7.71 
   2  -3  -2  179.53    7.78 
   2  -3  -2  174.99    7.77 
   2  -3  -2  182.22    7.70 
   2  -3  -2  177.34    7.68 
   2  -3  -2  179.16    7.44 
   2   3  -2  184.54    7.46 
  -2   3   2  176.77    7.68 
   2   3  -2  178.15    7.78 
  -2   3   2  179.72    7.80 
   2   3  -2  182.13    7.46 
  -2   3   2  186.21    7.72 
   2   3  -2  180.46    7.43 
   2   3  -2  182.44    7.46 
   2   3  -2  183.43    7.42 
   2   3  -2  183.46    7.46 
  -2   3   2  170.46    7.67 
   2   3  -2  181.37    7.46 
   2   3  -2  183.82    7.46 
  -2   3   2  176.63    7.61 
   2   3  -2  181.22    7.63 
  -2   3   2  184.12    7.70 
  -2   3   2  173.67    7.75 
  -1  -3   2   11.48    0.71 
  -1  -3   2   11.73    0.72 
   1  -3  -2   13.63    0.84 
  -1  -3   2   13.48    0.72 
   1  -3  -2   13.28    0.85 
  -1  -3   2   12.81    0.68 
  -1  -3   2   12.09    0.85 
  -1  -3   2   12.91    0.85 
   1  -3  -2   14.05    0.85 
   1  -3  -2   14.69    0.86 
   1  -3  -2   14.18    0.84 
   1  -3  -2   15.31    0.83 
   1  -3  -2   13.84    0.84 
  -1  -3   2   13.32    0.74 
   1  -3  -2   13.90    0.87 
   1  -3  -2   15.12    0.83 
   1  -3  -2   14.72    0.87 
   1   3  -2   13.43    0.72 
   1   3  -2   13.57    0.73 
  -1   3   2   14.37    0.87 
   1   3  -2   13.35    0.83 
  -1   3   2   13.50    0.86 
  -1   3   2   14.86    0.82 
   1   3  -2   12.84    0.67 
  -1   3   2   14.81    0.82 
   1   3  -2   12.83    0.85 
   1   3  -2   12.53    0.68 
  -1   3   2   14.87    0.85 
  -1   3   2   13.95    0.84 
   1   3  -2   12.19    0.70 
  -1   3   2   14.63    0.88 
  -1   3   2   14.61    0.84 
   1   3  -2   13.36    0.73 
   1   3  -2   12.40    0.67 
   1   3  -2   13.33    0.74 
   0  -3  -2    0.18    0.23 
   0  -3   2    0.64    0.21 
   0  -3  -2   -0.03    0.23 
   0  -3   2    0.46    0.18 
   0  -3   2    0.57    0.27 
   0  -3  -2    0.28    0.10 
   0  -3  -2    0.19    0.27 
   0  -3   2    0.48    0.23 
   0  -3   2    0.21    0.26 
   0  -3  -2    0.15    0.17 
   0  -3   2    0.58    0.23 
   0  -3   2    0.38    0.20 
   0  -3   2    0.76    0.26 
   0  -3   2    0.64    0.14 
   0  -3  -2    0.25    0.21 
   0  -3  -2    0.13    0.21 
   0  -3  -2    0.22    0.18 
   0  -3  -2    0.32    0.26 
   0  -3   2    0.59    0.23 
   0  -3  -2    0.18    0.11 
   0  -3  -2    0.32    0.15 
   0   3   2    0.07    0.20 
   0   3   2    0.19    0.16 
   0   3   2    0.37    0.20 
   0   3  -2    0.41    0.28 
   0   3   2    0.30    0.11 
   0   3   2    0.25    0.17 
   0   3  -2    0.48    0.21 
   0   3  -2    0.92    0.26 
   0   3  -2    0.57    0.21 
   0   3   2    0.26    0.15 
   0   3   2    0.56    0.26 
   0   3   2    0.27    0.18 
   0   3  -2    0.48    0.19 
   0   3   2    0.20    0.11 
   0   3  -2    0.67    0.14 
   0   3   2    0.34    0.20 
   0   3  -2    0.31    0.18 
   0   3   2    0.32    0.22 
   0   3   2    0.04    0.16 
   0   3  -2    0.54    0.19 
   0   3   2    0.63    0.21 
   0   3   2    0.09    0.15 
   0   3  -2    0.53    0.20 
   0   3  -2    0.49    0.23 
   0   3  -2    0.47    0.23 
   0   3  -2    0.40    0.21 
  -1  -3  -2    2.10    0.29 
  -1  -3  -2    2.57    0.24 
   1  -3   2    1.81    0.38 
   1  -3   2    2.34    0.42 
  -1  -3  -2    2.34    0.17 
  -1  -3  -2    2.38    0.32 
   1  -3   2    1.97    0.32 
   1  -3   2    1.78    0.27 
   1  -3   2    2.52    0.36 
   1  -3   2    1.90    0.36 
  -1  -3  -2    2.23    0.39 
  -1  -3  -2    2.32    0.18 
   1  -3   2    1.76    0.38 
  -1  -3  -2    2.33    0.29 
   1  -3   2    1.53    0.37 
  -1  -3  -2    1.92    0.29 
   1  -3   2    2.25    0.32 
   1  -3   2    2.00    0.39 
   1  -3   2    1.66    0.33 
  -1   3  -2    1.62    0.32 
  -1   3  -2    1.46    0.37 
   1   3   2    2.08    0.33 
   1   3   2    2.06    0.29 
   1   3   2    2.21    0.31 
   1   3   2    2.87    0.19 
   1   3   2    2.26    0.30 
   1   3   2    2.10    0.31 
   1   3   2    2.22    0.26 
   1   3   2    2.50    0.41 
  -1   3  -2    1.73    0.39 
   1   3   2    2.39    0.17 
  -1   3  -2    2.73    0.35 
   1   3   2    2.18    0.30 
  -1   3  -2    1.84    0.30 
   1   3   2    2.10    0.30 
  -1   3  -2    1.56    0.36 
   2  -3   2  412.60   18.39 
   2  -3   2  461.88   18.45 
   2  -3   2  427.11   18.42 
  -2  -3  -2  449.60   18.29 
   2  -3   2  445.09   18.54 
   2  -3   2  432.36   18.25 
  -2  -3  -2  448.23   18.27 
   2  -3   2  419.25   18.52 
   2  -3   2  446.14   18.41 
  -2  -3  -2  438.64   18.43 
  -2  -3  -2  465.50   18.27 
   2  -3   2  433.33   18.43 
  -2  -3  -2  437.80   18.41 
  -2  -3  -2  445.59   18.28 
   2  -3   2  433.19   18.22 
   2  -3   2  447.90   18.44 
   2  -3   2  427.56   18.44 
   2   3   2  458.40   18.29 
  -2   3  -2  423.34   18.37 
   2   3   2  443.83   18.27 
  -2   3  -2  444.25   18.42 
   2   3   2  445.23   18.33 
  -2   3  -2  438.55   18.44 
   2   3   2  446.70   18.28 
   2   3   2  439.63   18.51 
   2   3   2  446.90   18.27 
  -2   3  -2  417.45   18.41 
  -2   3  -2  435.56   18.22 
   2   3   2  449.50   18.29 
   2   3   2  447.21   18.28 
   2   3   2  450.81   18.27 
   2   3   2  450.35   18.29 
   3  -3   2  103.11    4.24 
  -3  -3  -2   99.26    4.50 
   3  -3   2   91.17    4.47 
   3  -3   2  101.79    4.50 
   3  -3   2   99.71    4.44 
   3  -3   2  102.63    4.69 
   3  -3   2   98.35    4.43 
   3  -3   2   90.70    4.45 
   3  -3   2   94.73    4.47 
   3  -3   2   99.36    4.66 
   3  -3   2   94.21    4.46 
  -3   3  -2  100.28    4.47 
   3   3   2   99.99    4.28 
  -3   3  -2   91.69    4.37 
  -3   3  -2  104.85    4.24 
   3   3   2  100.03    4.63 
   3   3   2   96.25    4.26 
   3   3   2  100.28    4.33 
   3   3   2  102.12    4.30 
  -3   3  -2  100.03    4.51 
   3   3   2   99.15    4.30 
   3   3   2   97.92    4.30 
   3   3   2   98.02    4.23 
   3   3   2   96.45    4.43 
  -3   3  -2  100.25    4.50 
   3   3   2   98.68    4.42 
   4  -3   2    0.85    0.33 
   4  -3   2    1.19    0.40 
   4  -3   2    0.49    0.19 
   4  -3   2    0.83    0.37 
   4  -3   2    1.05    0.39 
  -4  -3  -2    0.92    0.38 
   4  -3   2    0.77    0.36 
   4  -3   2    0.93    0.36 
   4  -3   2    1.87    0.53 
   4  -3   2    0.97    0.35 
  -4   3  -2    1.10    0.39 
   4   3   2    0.56    0.23 
   4   3   2    0.40    0.34 
  -4   3  -2    0.68    0.37 
   4   3   2    1.13    0.27 
  -4   3  -2    0.99    0.32 
   4   3   2    0.64    0.23 
  -4   3  -2    1.17    0.38 
   4   3   2    0.48    0.16 
   4   3   2    0.89    0.24 
   4   3   2    0.55    0.43 
   4   3   2    0.87    0.38 
   4   3   2    0.65    0.21 
   5  -3   2    8.57    1.01 
   5  -3   2   10.17    0.88 
   5  -3   2    6.89    0.92 
  -5  -3  -2    8.97    0.89 
   5  -3   2    9.44    0.64 
   5  -3   2    8.64    0.87 
   5  -3   2    8.77    0.80 
   5  -3   2    9.07    0.84 
   5  -3   2    7.94    0.88 
   5  -3   2    8.52    0.85 
   5   3   2    8.99    0.70 
   5   3   2   10.10    0.65 
   5   3   2    7.05    0.89 
  -5   3  -2    7.70    0.70 
   5   3   2    9.13    1.06 
  -5   3  -2    7.95    1.19 
   5   3   2    8.43    0.92 
   5   3   2    9.98    0.48 
   5   3   2    7.92    0.62 
   5   3   2   10.28    0.70 
   5   3   2    9.35    0.63 
   6  -3   2   19.83    1.43 
   6  -3   2   20.37    1.35 
  -6  -3  -2   22.40    1.56 
   6  -3   2   17.33    1.38 
   6  -3   2   17.39    1.71 
   6  -3   2   17.69    1.69 
   6  -3   2   16.79    1.32 
   6   3   2   21.23    1.59 
   6   3   2   22.46    1.12 
   6   3   2   21.26    1.66 
   6   3   2   21.50    1.13 
   6   3   2   21.22    1.28 
   6   3   2   20.65    1.76 
   6   3   2   22.06    1.22 
   6   3   2   19.33    1.15 
   7  -3   2    1.45    0.52 
   7  -3   2    2.20    0.73 
   7  -3   2    2.83    0.94 
   7  -3   2    2.43    0.61 
   7  -3   2    3.49    0.75 
   7   3   2    1.99    0.37 
   7   3   2    2.33    0.80 
   7   3   2    1.62    0.82 
   7   3   2    2.02    0.34 
   7   3   2    1.26    0.41 
   7   3   2    0.69    0.51 
   7   3   2    1.46    0.36 
  -7   3  -2    2.48    0.97 
   8  -3   2    0.25    0.83 
   8  -3   2    0.96    0.57 
   8  -3   2    1.28    0.59 
   8  -3   2    1.36    0.73 
   8   3   2    0.97    0.86 
   8   3   2    0.51    0.65 
   8   3   2   -0.28    0.26 
   8   3   2    1.31    0.41 
  -8   3  -2    1.16    0.90 
   8   3   2   -0.01    0.72 
   9  -3   2   19.54    2.23 
   9  -3   2   20.34    1.60 
   9  -3   2   16.34    1.97 
   9  -3   2   18.84    1.59 
   9   3   2   20.55    1.97 
   9   3   2   21.61    1.13 
  -9   3  -2   19.05    2.41 
   9   3   2   24.49    2.20 
   9  -4  -2    1.19    0.97 
   9  -4  -2    0.02    0.51 
   9  -4  -2    0.98    0.56 
   9  -4  -2   -0.65    0.82 
  -9   4   2   -1.16    0.63 
   9   4  -2    0.49    0.65 
   9   4  -2   -0.61    0.38 
   8  -4  -2   -0.42    0.53 
   8  -4  -2   -0.32    0.30 
   8  -4  -2    0.83    0.67 
   8  -4  -2    0.19    0.53 
   8  -4  -2   -0.24    0.49 
   8   4  -2   -0.96    0.51 
   8   4  -2    0.82    0.70 
  -8   4   2    0.09    0.79 
   8   4  -2    0.23    0.24 
   7  -4  -2    0.44    0.50 
   7  -4  -2   -0.40    0.39 
   7  -4  -2    0.01    0.65 
   7  -4  -2    0.19    0.37 
   7  -4  -2    0.43    0.46 
   7   4  -2    0.57    0.20 
   7   4  -2    1.24    0.62 
   7   4  -2    0.04    0.50 
  -7   4   2    0.38    0.68 
   6  -4  -2    6.25    1.11 
   6  -4  -2    7.04    0.86 
   6  -4  -2    5.82    0.96 
   6  -4  -2    6.01    0.76 
   6  -4  -2    6.60    0.79 
   6  -4  -2    5.70    0.79 
   6   4  -2    8.09    1.04 
   6   4  -2    5.51    0.86 
   6   4  -2    8.30    0.44 
   6   4  -2    6.49    0.90 
  -6   4   2    5.84    1.02 
   6   4  -2    7.15    0.97 
   5  -4  -2    2.25    0.55 
   5  -4  -2    2.36    0.65 
   5  -4  -2    2.98    0.53 
   5  -4  -2    2.26    0.73 
   5  -4  -2    2.75    0.58 
   5  -4  -2    2.15    0.45 
   5  -4  -2    3.39    0.59 
   5  -4  -2    3.11    0.60 
   5   4  -2    3.19    0.69 
   5   4  -2    3.03    0.72 
  -5   4   2    2.31    0.43 
  -5   4   2    2.78    0.63 
   5   4  -2    2.63    0.69 
  -5   4   2    1.80    0.66 
   5   4  -2    3.31    0.69 
  -5   4   2    3.44    0.61 
   4  -4  -2    1.12    0.33 
   4  -4  -2    0.69    0.38 
   4  -4  -2    1.37    0.45 
   4  -4  -2    1.00    0.39 
   4  -4  -2    1.53    0.42 
   4  -4  -2    0.99    0.44 
   4  -4  -2    2.11    0.61 
   4  -4  -2    1.31    0.42 
  -4   4   2    0.90    0.32 
  -4   4   2    1.33    0.41 
  -4   4   2    1.61    0.55 
  -4   4   2    1.57    0.46 
   4   4  -2    0.98    0.39 
  -4   4   2    1.66    0.47 
   4   4  -2    0.75    0.40 
  -4   4   2    1.25    0.40 
   4   4  -2    1.24    0.45 
  -4   4   2    1.08    0.40 
   4   4  -2    0.70    0.40 
   3  -4  -2   54.05    2.61 
   3  -4  -2   51.44    2.65 
   3  -4  -2   53.11    2.64 
   3  -4  -2   52.92    2.68 
   3  -4  -2   49.35    2.65 
   3  -4  -2   54.12    2.66 
   3  -4  -2   50.47    2.77 
   3  -4  -2   51.58    2.80 
   3  -4  -2   49.21    2.69 
   3  -4  -2   47.95    2.60 
  -3   4   2   50.99    2.64 
  -3   4   2   55.64    2.70 
   3   4  -2   59.86    2.81 
  -3   4   2   51.95    2.56 
   3   4  -2   60.02    2.32 
  -3   4   2   53.25    2.76 
   3   4  -2   58.18    2.29 
   3   4  -2   57.20    2.31 
   3   4  -2   56.33    2.28 
   3   4  -2   60.96    2.69 
  -3   4   2   51.45    2.80 
  -3   4   2   52.22    2.66 
  -3   4   2   49.59    2.64 
   2  -4  -2    0.81    0.35 
   2  -4  -2    0.33    0.31 
   2  -4  -2    0.88    0.33 
  -2  -4   2    1.92    0.38 
   2  -4  -2    0.70    0.27 
   2  -4  -2    0.73    0.29 
   2  -4  -2    0.77    0.26 
   2  -4  -2    0.74    0.33 
   2  -4  -2    0.99    0.25 
   2  -4  -2    0.81    0.35 
   2  -4  -2    1.03    0.29 
   2  -4  -2    0.68    0.27 
   2  -4  -2    1.03    0.35 
  -2  -4   2    1.50    0.36 
   2   4  -2    1.53    0.28 
  -2   4   2    1.34    0.39 
  -2   4   2    1.21    0.36 
  -2   4   2    1.19    0.37 
   2   4  -2    1.43    0.35 
  -2   4   2    0.92    0.32 
   2   4  -2    1.10    0.22 
   2   4  -2    1.28    0.22 
   2   4  -2    1.33    0.20 
   2   4  -2    1.98    0.22 
   2   4  -2    1.21    0.21 
   2   4  -2    1.61    0.22 
  -2   4   2    0.91    0.35 
  -2   4   2    0.78    0.30 
  -2   4   2    0.58    0.32 
   2   4  -2    1.66    0.25 
  -1  -4   2   48.48    2.14 
   1  -4  -2   47.08    2.18 
   1  -4  -2   43.70    2.22 
  -1  -4   2   46.71    2.11 
  -1  -4   2   43.70    2.25 
   1  -4  -2   44.53    2.23 
   1  -4  -2   46.30    2.23 
   1  -4  -2   48.58    2.18 
   1  -4  -2   44.62    2.22 
  -1  -4   2   45.56    2.05 
  -1  -4   2   44.13    2.12 
   1  -4  -2   44.53    2.21 
  -1  -4   2   44.51    2.24 
   1  -4  -2   46.70    2.29 
   1  -4  -2   47.24    2.22 
   1  -4  -2   46.72    2.27 
   1  -4  -2   45.64    2.21 
  -1  -4   2   41.76    2.10 
  -1   4   2   43.20    2.21 
   1   4  -2   46.89    2.12 
  -1   4   2   45.76    2.30 
   1   4  -2   45.20    2.11 
   1   4  -2   44.40    2.24 
   1   4  -2   46.41    2.11 
  -1   4   2   44.11    2.22 
  -1   4   2   45.98    2.21 
  -1   4   2   46.83    2.20 
   1   4  -2   45.90    2.15 
  -1   4   2   47.90    2.23 
   1   4  -2   44.97    2.08 
  -1   4   2   50.56    2.27 
   1   4  -2   47.22    2.13 
   1   4  -2   43.28    2.09 
  -1   4   2   44.83    2.20 
   1   4  -2   47.12    2.04 
   1   4  -2   47.45    2.12 
   1   4  -2   47.74    2.07 
   0  -4   2    5.09    0.50 
   0  -4   2    4.03    0.44 
   0  -4   2    5.46    0.37 
   0  -4   2    5.10    0.48 
   0  -4  -2    5.40    0.52 
   0  -4   2    4.41    0.52 
   0  -4  -2    5.21    0.34 
   0  -4  -2    5.45    0.47 
   0  -4   2    5.19    0.47 
   0  -4  -2    5.89    0.37 
   0  -4   2    5.17    0.47 
   0  -4   2    4.26    0.47 
   0  -4  -2    4.83    0.57 
   0  -4  -2    5.50    0.51 
   0  -4   2    4.70    0.52 
   0   4  -2    5.73    0.46 
   0   4  -2    6.24    0.49 
   0   4   2    5.25    0.52 
   0   4  -2    5.57    0.37 
   0   4   2    5.93    0.48 
   0   4   2    5.45    0.45 
   0   4  -2    5.31    0.41 
   0   4   2    4.87    0.51 
   0   4  -2    4.47    0.49 
   0   4   2    5.00    0.48 
   0   4   2    5.06    0.50 
   0   4   2    5.24    0.55 
   0   4  -2    4.50    0.51 
   0   4  -2    5.32    0.49 
   0   4  -2    5.32    0.45 
   0   4   2    5.24    0.37 
   0   4   2    5.20    0.47 
   0   4   2    4.54    0.46 
   0   4  -2    4.19    0.48 
   0   4   2    5.38    0.40 
   0   4  -2    4.60    0.49 
   0   4  -2    5.91    0.52 
   0   4   2    5.30    0.54 
   0   4   2    5.11    0.46 
   0   4   2    5.40    0.35 
  -1  -4  -2  161.75    6.90 
  -1  -4  -2  159.32    7.04 
   1  -4   2  153.12    6.98 
   1  -4   2  158.33    7.00 
  -1  -4  -2  160.51    6.92 
  -1  -4  -2  163.84    6.71 
   1  -4   2  161.57    7.03 
  -1  -4  -2  163.31    6.71 
  -1  -4  -2  161.88    6.73 
   1  -4   2  172.16    7.02 
   1  -4   2  153.36    6.99 
  -1  -4  -2  165.29    6.67 
   1  -4   2  158.97    7.01 
  -1  -4  -2  159.76    6.70 
   1  -4   2  161.89    7.05 
   1  -4   2  155.83    6.99 
  -1  -4  -2  161.15    6.90 
  -1  -4  -2  158.96    6.69 
   1  -4   2  161.94    7.06 
   1  -4   2  153.35    6.92 
  -1  -4  -2  166.72    6.69 
  -1   4  -2  160.83    7.00 
   1   4   2  166.73    6.93 
  -1   4  -2  162.48    7.00 
   1   4   2  169.89    6.90 
  -1   4  -2  164.44    6.92 
   1   4   2  165.70    6.91 
   1   4   2  158.56    7.03 
   1   4   2  167.57    6.87 
  -1   4  -2  156.34    6.98 
   1   4   2  163.19    6.91 
   1   4   2  162.49    6.97 
   1   4   2  162.94    6.92 
   1   4   2  165.11    6.91 
  -1   4  -2  165.98    6.98 
  -2  -4  -2   18.69    1.01 
   2  -4   2   18.50    1.07 
   2  -4   2   18.16    1.13 
   2  -4   2   17.15    1.22 
   2  -4   2   18.63    1.19 
   2  -4   2   21.93    1.28 
  -2  -4  -2   18.65    1.00 
   2  -4   2   21.05    1.19 
  -2  -4  -2   19.06    0.98 
  -2  -4  -2   18.88    0.96 
   2  -4   2   18.69    1.01 
  -2  -4  -2   17.12    1.00 
   2  -4   2   19.78    1.18 
  -2  -4  -2   17.09    1.01 
   2  -4   2   16.73    1.15 
   2  -4   2   19.87    1.15 
  -2  -4  -2   17.38    1.18 
   2  -4   2   19.83    1.20 
   2   4   2   18.46    1.02 
   2   4   2   18.90    0.85 
   2   4   2   17.59    1.00 
   2   4   2   19.21    0.86 
  -2   4  -2   19.21    1.14 
  -2   4  -2   19.29    1.18 
   2   4   2   19.26    0.98 
   2   4   2   17.77    1.00 
   2   4   2   19.27    1.03 
   2   4   2   19.24    1.23 
  -2   4  -2   20.71    1.22 
  -2   4  -2   17.37    1.13 
   2   4   2   17.78    1.05 
  -2   4  -2   18.14    1.18 
   2   4   2   18.20    1.00 
   2   4   2   18.09    0.96 
   3  -4   2  115.61    5.57 
   3  -4   2  114.52    5.41 
   3  -4   2  113.72    5.56 
   3  -4   2  119.02    5.43 
  -3  -4  -2  125.22    5.49 
   3  -4   2  116.34    5.37 
   3  -4   2  111.74    5.42 
   3  -4   2  115.70    5.38 
   3  -4   2  108.91    5.38 
   3  -4   2  122.95    5.45 
   3  -4   2  114.95    5.18 
   3   4   2  123.47    5.15 
   3   4   2  125.91    5.20 
   3   4   2  130.50    5.58 
  -3   4  -2  113.04    5.42 
  -3   4  -2  114.13    5.35 
  -3   4  -2  113.02    5.39 
   3   4   2  128.53    5.32 
   3   4   2  128.73    5.22 
   3   4   2  125.54    5.30 
   3   4   2  128.10    5.19 
   3   4   2  124.74    5.25 
   3   4   2  125.82    5.22 
  -3   4  -2  110.96    5.41 
  -3   4  -2  118.05    5.54 
   3   4   2  128.13    5.19 
   4  -4   2   32.25    2.05 
   4  -4   2   34.28    1.62 
   4  -4   2   32.99    1.88 
   4  -4   2   32.77    1.89 
   4  -4   2   32.78    1.88 
   4  -4   2   33.05    2.10 
   4  -4   2   29.94    1.77 
  -4  -4  -2   30.41    1.89 
   4  -4   2   32.56    1.88 
   4  -4   2   29.70    1.86 
  -4   4  -2   30.01    1.85 
   4   4   2   32.78    1.60 
  -4   4  -2   26.73    1.83 
   4   4   2   32.48    1.62 
  -4   4  -2   32.16    1.90 
   4   4   2   36.01    1.87 
  -4   4  -2   32.01    2.06 
   4   4   2   34.42    2.06 
   4   4   2   34.90    1.87 
   4   4   2   33.65    1.60 
  -4   4  -2   31.66    1.97 
  -4   4  -2   32.59    1.81 
   4   4   2   33.96    1.59 
   4   4   2   33.63    1.66 
   4   4   2   33.36    1.49 
  -4   4  -2   32.61    1.87 
   5  -4   2   11.57    0.72 
   5  -4   2   10.92    0.88 
   5  -4   2    9.42    0.95 
   5  -4   2   11.79    1.18 
  -5  -4  -2    8.21    1.00 
   5  -4   2   11.05    1.01 
   5  -4   2   10.62    0.96 
   5  -4   2   12.21    1.03 
   5  -4   2   11.92    1.00 
   5  -4   2    9.21    1.07 
   5   4   2   10.11    0.76 
   5   4   2    9.78    0.65 
   5   4   2    9.94    0.65 
   5   4   2   10.02    0.98 
   5   4   2    9.68    0.69 
   5   4   2    9.15    1.02 
   5   4   2   10.36    0.70 
   5   4   2    8.85    0.95 
  -5   4  -2   11.74    1.21 
  -5   4  -2   10.01    0.90 
  -6  -4  -2   26.96    1.82 
   6  -4   2   25.01    1.73 
   6  -4   2   22.02    1.64 
   6  -4   2   24.01    2.04 
   6  -4   2   24.82    2.04 
   6  -4   2   22.75    1.68 
   6   4   2   27.35    1.38 
  -6   4  -2   24.15    2.11 
   6   4   2   26.06    1.35 
   6   4   2   27.26    1.28 
   6   4   2   28.93    1.93 
   6   4   2   26.78    1.50 
   6   4   2   28.58    1.89 
   6   4   2   22.93    1.88 
   6   4   2   27.13    1.28 
   7  -4   2    1.78    0.64 
   7  -4   2    1.11    0.62 
   7  -4   2    0.83    0.52 
   7  -4   2    1.44    0.68 
   7  -4   2    2.46    0.87 
  -7   4  -2    1.52    1.02 
   7   4   2    1.15    0.31 
   7   4   2    2.34    0.50 
   7   4   2    1.84    0.77 
   7   4   2    1.88    0.72 
   7   4   2    2.23    0.92 
   7   4   2    1.15    0.33 
   8  -4   2   25.15    2.30 
   8  -4   2   25.17    1.88 
   8  -4   2   24.82    1.88 
   8  -4   2   24.41    2.26 
   8   4   2   26.16    2.34 
   8   4   2   27.72    1.35 
   8   4   2   27.52    2.22 
   8   4   2   27.35    1.36 
  -8   4  -2   29.73    2.65 
   8   4   2   27.32    2.20 
   9  -4   2    1.50    0.85 
   9  -4   2    1.65    0.68 
   9  -4   2    0.41    0.61 
   9  -4   2    0.70    0.32 
   9  -4   2    0.63    0.77 
   9   4   2    0.42    0.65 
   9   4   2    1.16    0.90 
   9   4   2    1.31    0.84 
  -9   4  -2   -0.29    1.28 
   9  -5  -2    1.91    0.70 
   9  -5  -2    1.78    0.97 
   9  -5  -2    2.21    0.73 
   9  -5  -2    2.08    0.47 
   9  -5  -2    0.27    0.74 
   9   5  -2    1.61    0.94 
   9   5  -2    2.16    0.98 
  -9   5   2    1.84    1.09 
   9   5  -2    2.66    0.42 
   8  -5  -2    2.51    0.72 
   8  -5  -2    1.67    1.01 
   8  -5  -2    1.93    0.59 
   8  -5  -2    0.65    0.89 
   8   5  -2    1.99    0.31 
  -8   5   2    4.05    1.43 
   8   5  -2    4.50    1.07 
   8   5  -2    3.98    1.08 
   7  -5  -2    1.12    0.56 
   7  -5  -2    0.57    0.57 
   7  -5  -2   -0.15    0.46 
   7  -5  -2    1.06    0.57 
   7  -5  -2    0.35    0.40 
   7   5  -2    0.67    0.62 
   7   5  -2    1.06    0.52 
   7   5  -2    0.11    0.14 
   7   5  -2    1.47    0.68 
  -7   5   2    0.44    0.64 
   6  -5  -2    1.87    0.70 
   6  -5  -2    3.12    0.98 
   6  -5  -2    2.70    0.71 
   6  -5  -2    2.89    0.60 
   6  -5  -2    3.94    0.74 
   6   5  -2    2.75    0.79 
   6   5  -2    3.83    0.26 
   6   5  -2    2.58    0.79 
   6   5  -2    4.46    0.87 
  -6   5   2    3.22    0.91 
   5  -5  -2    3.96    0.69 
   5  -5  -2    4.17    0.62 
   5  -5  -2    2.62    0.76 
   5  -5  -2    3.77    0.61 
   5  -5  -2    4.62    0.68 
   5  -5  -2    2.22    0.58 
   5  -5  -2    3.75    0.58 
   5  -5  -2    4.23    0.88 
   5   5  -2    4.99    0.78 
  -5   5   2    3.71    0.66 
   5   5  -2    4.63    0.67 
  -5   5   2    1.78    0.67 
   5   5  -2    4.33    0.74 
  -5   5   2    3.49    0.59 
   4  -5  -2   31.22    1.80 
   4  -5  -2   29.46    1.78 
   4  -5  -2   29.12    1.76 
   4  -5  -2   28.40    1.80 
   4  -5  -2   31.68    1.73 
   4  -5  -2   27.92    1.77 
   4  -5  -2   29.91    1.95 
   4  -5  -2   28.63    1.97 
  -4   5   2   29.69    1.70 
  -4   5   2   28.50    1.76 
  -4   5   2   27.20    1.78 
  -4   5   2   25.34    1.84 
   4   5  -2   33.55    1.33 
  -4   5   2   26.32    1.89 
  -4   5   2   29.72    1.83 
   4   5  -2   33.71    1.32 
  -4   5   2   30.07    1.79 
   4   5  -2   30.79    1.80 
  -3  -5   2   17.57    1.22 
   3  -5  -2   18.68    1.15 
   3  -5  -2   19.43    1.23 
   3  -5  -2   17.51    1.25 
  -3  -5   2   16.96    1.19 
   3  -5  -2   16.13    1.13 
   3  -5  -2   17.09    0.78 
   3  -5  -2   15.64    1.15 
   3  -5  -2   16.43    1.20 
   3  -5  -2   17.29    0.78 
   3  -5  -2   15.71    1.14 
   3  -5  -2   17.50    1.25 
   3  -5  -2   17.08    1.24 
   3  -5  -2   18.06    1.19 
   3   5  -2   16.54    0.86 
  -3   5   2   16.25    1.19 
   3   5  -2   16.51    0.75 
  -3   5   2   16.07    1.23 
   3   5  -2   16.56    0.75 
   3   5  -2   15.49    1.07 
   3   5  -2   17.87    0.87 
  -3   5   2   16.57    1.17 
   3   5  -2   16.38    0.85 
  -3   5   2   17.09    1.18 
   3   5  -2   16.34    0.85 
   3   5  -2   16.28    0.86 
  -3   5   2   17.36    1.21 
  -3   5   2   17.56    1.28 
  -3   5   2   17.79    1.13 
   2  -5  -2   37.24    2.05 
   2  -5  -2   38.52    2.04 
   2  -5  -2   36.55    2.03 
   2  -5  -2   36.02    1.99 
  -2  -5   2   39.76    2.06 
   2  -5  -2   37.24    2.03 
   2  -5  -2   38.60    2.05 
   2  -5  -2   37.03    2.03 
   2  -5  -2   38.95    2.04 
   2  -5  -2   37.65    2.11 
   2  -5  -2   36.51    2.03 
  -2  -5   2   39.43    2.04 
   2  -5  -2   42.60    2.08 
   2   5  -2   40.02    1.81 
   2   5  -2   39.59    2.12 
  -2   5   2   41.57    2.03 
   2   5  -2   40.08    1.81 
  -2   5   2   40.42    2.05 
   2   5  -2   38.22    1.82 
   2   5  -2   37.82    1.81 
  -2   5   2   37.16    2.03 
   2   5  -2   40.51    1.83 
  -2   5   2   40.27    2.05 
   2   5  -2   38.34    1.81 
  -2   5   2   39.83    2.14 
   2   5  -2   39.24    1.89 
  -2   5   2   37.52    2.08 
  -2   5   2   36.92    2.04 
   2   5  -2   39.31    1.85 
  -1  -5   2    0.08    0.19 
   1  -5  -2   -0.03    0.25 
  -1  -5   2   -0.15    0.15 
   1  -5  -2   -0.02    0.18 
  -1  -5   2    0.19    0.09 
   1  -5  -2   -0.08    0.24 
   1  -5  -2   -0.11    0.19 
  -1  -5   2    0.03    0.22 
  -1  -5   2    0.01    0.09 
  -1  -5   2    0.02    0.22 
  -1  -5   2   -0.18    0.16 
   1  -5  -2   -0.09    0.18 
  -1  -5   2   -0.07    0.20 
  -1  -5   2    0.01    0.13 
  -1  -5   2   -0.21    0.15 
   1  -5  -2   -0.08    0.18 
   1   5  -2    0.08    0.19 
   1   5  -2   -0.03    0.14 
   1   5  -2   -0.13    0.17 
   1   5  -2    0.11    0.20 
   1   5  -2   -0.04    0.19 
  -1   5   2    0.08    0.22 
   1   5  -2   -0.02    0.19 
  -1   5   2   -0.01    0.24 
   1   5  -2   -0.11    0.17 
   1   5  -2   -0.18    0.15 
  -1   5   2   -0.20    0.24 
  -1   5   2   -0.04    0.19 
  -1   5   2    0.17    0.25 
   1   5  -2   -0.09    0.13 
  -1   5   2    0.22    0.25 
  -1   5   2    0.07    0.20 
  -1   5   2    0.13    0.27 
   1   5  -2    0.07    0.18 
   1   5  -2   -0.08    0.18 
   0  -5  -2    4.69    0.36 
   0  -5  -2    3.70    0.49 
   0  -5  -2    5.01    0.38 
   0  -5   2    4.58    0.50 
   0  -5   2    4.62    0.48 
   0  -5   2    4.50    0.52 
   0  -5   2    4.43    0.47 
   0  -5  -2    4.72    0.59 
   0  -5   2    4.84    0.48 
   0  -5   2    4.83    0.38 
   0  -5   2    4.80    0.51 
   0  -5   2    5.17    0.59 
   0  -5  -2    4.70    0.49 
   0  -5   2    5.67    0.54 
   0  -5  -2    4.73    0.48 
   0   5  -2    5.42    0.39 
   0   5   2    4.90    0.51 
   0   5   2    4.70    0.51 
   0   5  -2    3.46    0.51 
   0   5  -2    4.20    0.43 
   0   5   2    4.59    0.49 
   0   5   2    4.54    0.54 
   0   5  -2    4.38    0.50 
   0   5   2    4.58    0.51 
   0   5   2    5.09    0.52 
   0   5   2    4.84    0.36 
   0   5  -2    5.10    0.56 
   0   5   2    5.20    0.39 
   0   5   2    4.80    0.57 
   0   5  -2    4.48    0.49 
   0   5   2    4.51    0.44 
   0   5   2    5.06    0.50 
   0   5  -2    4.96    0.42 
   0   5  -2    3.96    0.45 
   0   5   2    4.21    0.47 
   0   5  -2    5.16    0.49 
   0   5   2    4.20    0.50 
   0   5  -2    3.84    0.49 
   0   5   2    4.47    0.39 
   0   5  -2    4.65    0.51 
   0   5  -2    3.99    0.50 
   0   5   2    5.47    0.55 
   0   5  -2    4.93    0.46 
  -1  -5  -2   12.91    0.56 
   1  -5   2   12.41    0.92 
  -1  -5  -2   11.24    0.77 
  -1  -5  -2   12.36    0.95 
  -1  -5  -2   10.99    0.79 
   1  -5   2   10.80    0.87 
   1  -5   2   11.46    0.87 
   1  -5   2   10.71    0.88 
  -1  -5  -2   12.76    0.55 
  -1  -5  -2   12.42    0.60 
  -1  -5  -2   11.51    0.79 
   1  -5   2   12.90    0.85 
   1  -5   2    9.67    0.80 
   1  -5   2   10.82    0.84 
  -1  -5  -2   12.07    0.65 
   1   5   2   11.52    0.83 
  -1   5  -2   10.79    0.83 
   1   5   2   11.28    0.79 
   1   5   2   11.37    0.77 
   1   5   2   11.82    0.77 
   1   5   2   11.26    0.80 
  -1   5  -2    9.78    0.90 
   1   5   2   11.38    0.90 
   1   5   2   11.82    0.80 
  -1   5  -2   11.53    0.87 
   1   5   2   12.30    0.75 
   1   5   2   12.37    0.81 
   1   5   2   11.56    0.78 
   1   5   2   11.39    0.88 
  -1   5  -2   11.48    0.78 
  -1   5  -2   12.25    0.88 
  -1   5  -2   12.70    0.89 
  -1   5  -2   12.00    0.83 
  -2  -5  -2   12.15    0.77 
   2  -5   2    9.66    0.85 
   2  -5   2   10.26    0.91 
   2  -5   2   11.19    0.90 
  -2  -5  -2   13.00    0.69 
  -2  -5  -2   11.78    0.77 
   2  -5   2   11.76    0.93 
   2  -5   2   10.42    0.91 
  -2  -5  -2   13.35    0.82 
   2  -5   2   12.06    0.97 
   2  -5   2   12.39    0.97 
   2  -5   2   11.10    0.81 
  -2  -5  -2   10.88    0.96 
   2  -5   2   11.74    0.91 
   2  -5   2   11.15    0.92 
  -2  -5  -2   13.14    0.69 
  -2   5  -2   10.81    0.88 
   2   5   2   11.96    0.79 
   2   5   2   12.72    0.68 
  -2   5  -2   11.85    0.90 
   2   5   2   12.07    0.79 
  -2   5  -2   11.75    1.01 
   2   5   2   13.47    0.82 
   2   5   2   13.90    0.81 
  -2   5  -2   12.48    0.96 
  -2   5  -2   10.41    0.89 
  -2   5  -2   11.89    0.91 
  -2   5  -2    9.57    0.89 
   2   5   2   13.59    0.99 
   2   5   2   13.11    0.65 
   2   5   2   12.20    0.79 
   2   5   2   12.03    0.82 
   3  -5   2    0.34    0.31 
   3  -5   2    0.34    0.23 
   3  -5   2    0.32    0.35 
   3  -5   2    0.75    0.37 
   3  -5   2    0.57    0.38 
   3  -5   2    0.30    0.19 
   3  -5   2    0.24    0.27 
   3  -5   2    0.47    0.37 
   3  -5   2   -0.10    0.33 
  -3  -5  -2    0.34    0.30 
   3  -5   2    0.40    0.35 
   3  -5   2    0.09    0.31 
  -3   5  -2    0.68    0.39 
   3   5   2    0.35    0.22 
   3   5   2    0.19    0.25 
   3   5   2    0.08    0.23 
  -3   5  -2    0.50    0.41 
   3   5   2    0.36    0.22 
  -3   5  -2    0.32    0.29 
   3   5   2    0.35    0.23 
   3   5   2    0.24    0.21 
   3   5   2    0.26    0.30 
  -3   5  -2    0.35    0.32 
  -3   5  -2   -0.11    0.33 
  -3   5  -2    0.34    0.35 
   3   5   2    0.28    0.22 
   3   5   2    0.23    0.23 
  -3   5  -2    0.38    0.34 
   4  -5   2    3.86    0.67 
   4  -5   2    4.01    0.59 
   4  -5   2    3.90    0.68 
   4  -5   2    5.00    0.63 
   4  -5   2    2.88    0.62 
   4  -5   2    2.65    0.64 
   4  -5   2    3.50    0.55 
   4  -5   2    4.41    0.63 
   4  -5   2    4.01    0.66 
   4  -5   2    3.87    0.45 
  -4  -5  -2    3.74    0.69 
  -4   5  -2    3.66    0.62 
  -4   5  -2    3.95    0.67 
   4   5   2    3.65    0.30 
   4   5   2    3.30    0.38 
  -4   5  -2    2.80    0.70 
   4   5   2    2.33    0.52 
  -4   5  -2    4.27    0.72 
   4   5   2    3.95    0.44 
   4   5   2    2.16    0.47 
  -4   5  -2    3.72    0.58 
  -4   5  -2    3.08    0.62 
  -4   5  -2    3.99    0.66 
   4   5   2    3.01    0.40 
   4   5   2    3.00    0.40 
   4   5   2    3.55    0.31 
   4   5   2    3.61    0.44 
   4   5   2    3.54    0.40 
   4   5   2    3.98    0.64 
   5  -5   2   -0.21    0.33 
   5  -5   2   -0.11    0.42 
   5  -5   2    0.14    0.36 
   5  -5   2    0.11    0.20 
   5  -5   2    0.12    0.41 
   5  -5   2    0.29    0.36 
  -5  -5  -2    0.00    0.44 
   5  -5   2   -0.56    0.29 
   5  -5   2    0.53    0.46 
   5   5   2    0.22    0.42 
   5   5   2    0.19    0.21 
   5   5   2    0.03    0.40 
   5   5   2   -0.13    0.35 
   5   5   2    0.13    0.18 
  -5   5  -2    0.06    0.42 
   5   5   2   -0.04    0.20 
  -5   5  -2   -0.13    0.38 
   5   5   2    0.40    0.24 
   5   5   2    0.27    0.18 
   6  -5   2    3.59    0.80 
   6  -5   2    3.41    0.79 
  -6  -5  -2    3.47    0.81 
   6  -5   2    3.65    0.74 
   6  -5   2    3.59    0.78 
   6  -5   2    3.30    0.78 
   6   5   2    3.70    0.74 
   6   5   2    2.82    0.83 
   6   5   2    3.02    0.28 
   6   5   2    2.77    0.40 
   6   5   2    1.78    0.67 
  -6   5  -2    2.47    1.00 
   6   5   2    2.95    0.30 
   6   5   2    3.01    0.40 
   6   5   2    2.89    0.50 
   7  -5   2    0.54    0.58 
   7  -5   2    0.60    0.79 
   7  -5   2    0.81    0.57 
   7  -5   2    2.11    0.71 
   7  -5   2    1.09    0.68 
   7   5   2    1.92    0.72 
  -7   5  -2    1.21    0.81 
   7   5   2    1.71    0.86 
   7   5   2    2.09    0.48 
   7   5   2    1.70    0.70 
   7   5   2    1.79    0.34 
   7   5   2    0.92    0.26 
   8  -5   2    5.00    1.04 
   8  -5   2    3.84    1.21 
   8  -5   2    3.82    0.98 
   8  -5   2    3.55    1.18 
   8   5   2    2.91    0.20 
   8   5   2    3.19    0.23 
  -8   5  -2    4.62    1.44 
   8   5   2    3.69    1.04 
   8   5   2    6.25    1.13 
   8   5   2    2.34    0.90 
   9  -5   2    2.68    0.83 
   9  -5   2    2.55    0.85 
   9  -5   2    0.95    0.97 
   9  -5   2    3.39    1.30 
   9   5   2    3.02    1.03 
  -9   5  -2    1.78    1.30 
   9  -6  -2    0.51    0.48 
   9  -6  -2    0.11    0.91 
   9  -6  -2    0.35    0.56 
   9  -6  -2    0.58    0.93 
   9   6  -2    1.07    0.80 
   9   6  -2    1.99    0.92 
  -9   6   2    1.63    1.12 
   8  -6  -2   12.00    1.28 
   8  -6  -2    9.87    1.05 
   8  -6  -2   11.16    1.26 
   8  -6  -2    8.52    1.39 
   8  -6  -2   10.28    1.65 
  -8  -6   2    9.66    1.52 
   8   6  -2    8.73    1.35 
   8   6  -2    9.24    1.37 
  -8   6   2    9.10    1.65 
   7  -6  -2    6.35    1.12 
   7  -6  -2    7.64    1.39 
  -7  -6   2    6.92    1.27 
   7  -6  -2    8.64    1.11 
   7  -6  -2    7.56    1.05 
   7   6  -2    7.11    1.12 
   7   6  -2    6.18    1.09 
   7   6  -2    6.74    1.11 
   6  -6  -2    0.68    0.53 
   6  -6  -2    1.13    0.76 
   6  -6  -2    0.91    0.52 
   6  -6  -2    1.19    0.67 
   6  -6  -2    0.93    0.42 
   6   6  -2    0.93    0.58 
  -6   6   2    0.86    0.63 
   6   6  -2    0.54    0.56 
   6   6  -2    0.62    0.55 
   5  -6  -2    0.53    0.63 
   5  -6  -2    1.05    0.56 
   5  -6  -2    0.77    0.50 
   5  -6  -2    1.11    0.54 
   5  -6  -2    0.81    0.67 
   5  -6  -2    1.24    0.49 
   5  -6  -2    0.87    0.43 
   5   6  -2    0.44    0.48 
  -5   6   2    1.25    0.74 
  -5   6   2    1.71    0.55 
  -4  -6   2    0.42    0.40 
   4  -6  -2    0.66    0.45 
   4  -6  -2    0.22    0.33 
   4  -6  -2    0.39    0.43 
   4  -6  -2    0.39    0.32 
   4  -6  -2   -0.01    0.34 
   4  -6  -2    0.56    0.41 
   4  -6  -2    0.69    0.40 
   4  -6  -2    0.57    0.36 
  -4   6   2    0.32    0.39 
   4   6  -2    0.51    0.38 
   4   6  -2    0.27    0.12 
  -4   6   2    0.81    0.45 
  -4   6   2    1.22    0.49 
  -4   6   2    0.59    0.42 
  -4   6   2    0.42    0.45 
  -4   6   2    0.26    0.42 
   4   6  -2    0.41    0.11 
   4   6  -2    0.26    0.14 
   4   6  -2    0.30    0.15 
  -4   6   2    0.58    0.43 
   3  -6  -2    0.91    0.42 
  -3  -6   2    0.54    0.38 
   3  -6  -2    0.63    0.36 
   3  -6  -2    0.54    0.38 
   3  -6  -2    0.71    0.38 
   3  -6  -2    0.78    0.38 
   3  -6  -2    0.64    0.43 
  -3  -6   2    0.59    0.36 
   3  -6  -2    0.29    0.43 
   3  -6  -2    0.94    0.40 
   3  -6  -2    1.41    0.40 
   3  -6  -2    0.25    0.24 
   3  -6  -2    1.26    0.48 
   3  -6  -2    1.25    0.46 
   3   6  -2    0.31    0.18 
   3   6  -2    0.43    0.18 
  -3   6   2    0.54    0.42 
  -3   6   2    0.60    0.42 
   3   6  -2    0.55    0.31 
   3   6  -2    0.52    0.22 
   3   6  -2    0.11    0.19 
  -3   6   2    0.63    0.42 
  -3   6   2    1.42    0.51 
   3   6  -2    0.21    0.20 
   3   6  -2    0.49    0.23 
  -3   6   2    0.03    0.40 
  -3   6   2    0.92    0.43 
  -3   6   2    0.89    0.42 
   3   6  -2    0.53    0.21 
  -2  -6   2    5.70    0.63 
   2  -6  -2    5.43    0.70 
   2  -6  -2    5.55    0.63 
   2  -6  -2    6.10    0.64 
   2  -6  -2    5.06    0.66 
  -2  -6   2    5.59    0.51 
  -2  -6   2    7.01    0.84 
   2  -6  -2    5.55    0.67 
  -2  -6   2    5.90    0.52 
   2  -6  -2    6.98    0.71 
  -2  -6   2    5.27    0.64 
  -2   6   2    6.36    0.66 
   2   6  -2    5.84    0.52 
  -2   6   2    4.41    0.68 
   2   6  -2    6.16    0.35 
   2   6  -2    5.70    0.50 
  -2   6   2    6.26    0.69 
   2   6  -2    5.71    0.55 
   2   6  -2    6.02    0.36 
  -2   6   2    5.85    0.64 
   2   6  -2    5.34    0.50 
   2   6  -2    5.77    0.67 
  -2   6   2    5.23    0.68 
   2   6  -2    5.99    0.51 
   2   6  -2    6.73    0.55 
  -2   6   2    6.06    0.71 
  -2   6   2    3.71    0.63 
  -2   6   2    6.85    0.70 
   2   6  -2    6.12    0.53 
   2   6  -2    5.17    0.51 
  -1  -6   2    0.02    0.12 
   1  -6  -2   -0.26    0.19 
  -1  -6   2    0.08    0.24 
  -1  -6   2   -0.21    0.17 
  -1  -6   2    0.10    0.23 
  -1  -6   2    0.19    0.24 
   1  -6  -2   -0.13    0.29 
  -1  -6   2   -0.02    0.15 
  -1  -6   2    0.35    0.22 
  -1  -6   2    0.26    0.28 
  -1  -6   2   -0.04    0.14 
   1  -6  -2    0.03    0.29 
   1  -6  -2   -0.15    0.20 
   1  -6  -2    0.08    0.23 
  -1  -6   2    0.07    0.22 
  -1  -6   2    0.01    0.17 
   1  -6  -2   -0.02    0.23 
  -1   6   2    0.15    0.21 
  -1   6   2   -0.31    0.28 
   1   6  -2   -0.02    0.21 
   1   6  -2    0.12    0.20 
   1   6  -2    0.21    0.26 
  -1   6   2    0.07    0.26 
  -1   6   2   -0.05    0.27 
  -1   6   2   -0.30    0.28 
   1   6  -2    0.31    0.31 
   1   6  -2    0.08    0.23 
   1   6  -2   -0.20    0.19 
  -1   6   2    0.33    0.25 
   1   6  -2   -0.27    0.20 
   1   6  -2   -0.08    0.21 
  -1   6   2   -0.09    0.21 
   1   6  -2    0.04    0.22 
   1   6  -2   -0.03    0.17 
   1   6  -2    0.02    0.17 
  -1   6   2    0.05    0.24 
   0  -6  -2    1.80    0.37 
   0  -6  -2    1.72    0.44 
   0  -6  -2    1.97    0.27 
   0  -6   2    2.15    0.43 
   0  -6   2    1.17    0.43 
   0  -6  -2    2.09    0.45 
   0  -6   2    2.19    0.43 
   0  -6  -2    2.00    0.29 
   0  -6   2    2.27    0.35 
   0  -6   2    1.98    0.37 
   0  -6   2    2.32    0.39 
   0  -6  -2    1.83    0.42 
   0  -6   2    2.33    0.38 
   0  -6   2    1.67    0.42 
   0   6   2    2.00    0.40 
   0   6  -2    2.52    0.42 
   0   6   2    2.03    0.39 
   0   6   2    2.01    0.37 
   0   6  -2    2.03    0.32 
   0   6  -2    1.86    0.35 
   0   6   2    2.26    0.30 
   0   6   2    2.56    0.29 
   0   6   2    2.05    0.34 
   0   6   2    2.12    0.45 
   0   6   2    2.03    0.46 
   0   6  -2    1.56    0.35 
   0   6  -2    2.32    0.48 
   0   6   2    2.15    0.48 
   0   6   2    2.06    0.38 
   0   6  -2    1.80    0.40 
   0   6  -2    2.20    0.31 
   0   6  -2    2.01    0.43 
   0   6  -2    1.45    0.36 
   0   6  -2    1.97    0.26 
   0   6   2    2.39    0.43 
   0   6  -2    1.91    0.39 
   0   6  -2    2.21    0.46 
   0   6  -2    2.27    0.40 
   0   6   2    1.81    0.37 
   0   6   2    1.45    0.33 
   0   6   2    1.42    0.33 
   0   6  -2    2.31    0.36 
   1  -6   2    0.91    0.34 
  -1  -6  -2    0.79    0.31 
   1  -6   2    0.25    0.25 
   1  -6   2    0.97    0.37 
  -1  -6  -2    0.96    0.31 
   1  -6   2    1.16    0.36 
  -1  -6  -2    1.23    0.25 
  -1  -6  -2    1.09    0.19 
   1  -6   2    0.82    0.32 
   1  -6   2    0.95    0.38 
  -1  -6  -2    1.08    0.33 
  -1  -6  -2    1.02    0.45 
   1  -6   2    0.78    0.31 
  -1  -6  -2    1.28    0.15 
   1   6   2    0.79    0.31 
   1   6   2    1.14    0.32 
  -1   6  -2    1.04    0.41 
   1   6   2    0.93    0.33 
   1   6   2    0.84    0.32 
   1   6   2    1.04    0.33 
  -1   6  -2    1.52    0.41 
   1   6   2    0.60    0.30 
  -1   6  -2    0.43    0.37 
  -1   6  -2    0.93    0.34 
  -1   6  -2    0.78    0.33 
   1   6   2    1.64    0.48 
   1   6   2    0.96    0.34 
   1   6   2    1.28    0.20 
   1   6   2    0.93    0.33 
  -1   6  -2    1.04    0.31 
   1   6   2    1.56    0.39 
  -1   6  -2    0.71    0.30 
   1   6   2    0.82    0.30 
  -2  -6  -2    5.10    0.39 
   2  -6   2    4.61    0.54 
  -2  -6  -2    4.50    0.50 
  -2  -6  -2    4.96    0.73 
  -2  -6  -2    4.17    0.50 
   2  -6   2    3.84    0.59 
  -2  -6  -2    6.10    0.46 
   2  -6   2    5.20    0.71 
  -2  -6  -2    5.85    0.43 
   2  -6   2    4.40    0.59 
  -2  -6  -2    5.10    0.52 
   2  -6   2    3.95    0.61 
   2  -6   2    4.61    0.61 
   2  -6   2    3.82    0.63 
  -2  -6  -2    5.90    0.39 
   2   6   2    5.54    0.42 
  -2   6  -2    4.86    0.61 
  -2   6  -2    3.14    0.56 
  -2   6  -2    4.79    0.74 
   2   6   2    4.59    0.47 
   2   6   2    4.68    0.53 
   2   6   2    4.73    0.50 
   2   6   2    6.05    0.54 
  -2   6  -2    5.15    0.63 
  -2   6  -2    3.55    0.51 
  -2   6  -2    4.46    0.58 
   2   6   2    4.53    0.51 
   2   6   2    6.34    0.48 
   2   6   2    5.33    0.53 
   2   6   2    5.80    0.67 
  -2   6  -2    4.01    0.57 
   2   6   2    5.04    0.58 
   3  -6   2    1.73    0.52 
   3  -6   2    1.26    0.42 
   3  -6   2    1.54    0.37 
   3  -6   2    2.03    0.53 
  -3  -6  -2    1.15    0.42 
   3  -6   2    1.36    0.48 
   3  -6   2    1.94    0.52 
   3  -6   2    1.86    0.35 
   3  -6   2    1.10    0.50 
   3  -6   2    2.18    0.57 
   3  -6   2    0.91    0.47 
   3  -6   2    2.21    0.59 
   3   6   2    1.57    0.34 
   3   6   2    0.83    0.28 
  -3   6  -2    0.99    0.39 
   3   6   2    1.11    0.34 
  -3   6  -2    2.16    0.48 
   3   6   2    1.08    0.31 
  -3   6  -2    1.31    0.47 
  -3   6  -2    1.38    0.47 
  -3   6  -2    1.32    0.44 
   3   6   2    1.03    0.31 
   3   6   2    0.88    0.46 
  -3   6  -2    1.77    0.49 
   3   6   2    0.55    0.28 
   3   6   2    0.99    0.29 
  -3   6  -2    2.10    0.60 
  -4  -6  -2    3.83    0.64 
   4  -6   2    4.37    0.52 
   4  -6   2    2.31    0.54 
   4  -6   2    2.71    0.61 
   4  -6   2    4.20    0.63 
   4  -6   2    3.27    0.60 
   4  -6   2    3.71    0.65 
   4  -6   2    4.05    0.75 
   4  -6   2    2.02    0.64 
   4  -6   2    2.92    0.64 
   4  -6   2    3.82    0.69 
   4   6   2    3.27    0.44 
  -4   6  -2    4.12    0.73 
   4   6   2    3.29    0.43 
  -4   6  -2    3.52    0.67 
  -4   6  -2    2.50    0.65 
  -4   6  -2    3.07    0.67 
   4   6   2    2.36    0.44 
   4   6   2    2.95    0.73 
  -4   6  -2    3.34    0.69 
   4   6   2    2.52    0.39 
  -4   6  -2    3.75    0.79 
   4   6   2    3.03    0.33 
   4   6   2    3.18    0.40 
   4   6   2    1.71    0.43 
   4   6   2    2.91    0.31 
  -4   6  -2    3.80    0.67 
   4   6   2    3.25    0.46 
   5  -6   2    5.07    0.57 
  -5  -6  -2    5.23    0.89 
   5  -6   2    3.54    0.79 
   5  -6   2    4.20    0.69 
   5  -6   2    5.17    0.74 
   5  -6   2    5.20    0.84 
   5  -6   2    5.12    0.88 
   5  -6   2    5.02    0.98 
   5   6   2    4.75    0.52 
   5   6   2    5.96    0.79 
   5   6   2    6.97    0.97 
   5   6   2    4.97    0.68 
   5   6   2    4.80    0.49 
   5   6   2    5.20    0.47 
   5   6   2    4.77    0.44 
  -5   6  -2    3.82    0.80 
  -5   6  -2    5.29    0.83 
   6  -6   2    8.55    1.11 
   6  -6   2    9.09    1.33 
  -6  -6  -2    9.02    1.18 
   6  -6   2    8.73    1.10 
   6  -6   2    9.51    1.14 
   6  -6   2    8.62    1.19 
   6   6   2    9.40    1.11 
  -6   6  -2    7.86    1.08 
   6   6   2   11.26    0.71 
  -6   6  -2    8.47    1.23 
   6   6   2    9.93    1.17 
   6   6   2   10.95    0.54 
   6   6   2   10.25    1.10 
   6   6   2   10.11    0.69 
   6   6   2   11.20    0.54 
   7  -6   2    0.82    0.83 
   7  -6   2    0.93    0.71 
  -7  -6  -2    1.79    0.74 
   7  -6   2    0.94    0.64 
   7  -6   2    0.85    0.66 
   7  -6   2    1.00    0.62 
   7   6   2    1.70    0.27 
   7   6   2    1.31    0.26 
   7   6   2    2.09    0.76 
   7   6   2    1.35    0.79 
  -7   6  -2   -0.40    0.86 
   7   6   2    0.82    0.63 
   8  -6   2    1.73    0.86 
   8  -6   2    1.23    0.80 
   8  -6   2    0.33    0.60 
   8  -6   2    1.09    0.73 
   8   6   2    0.41    0.63 
   8   6   2    2.57    1.00 
  -8   6  -2    0.57    0.79 
   9  -6   2    0.74    0.78 
   9  -6   2    0.49    0.63 
   9  -6   2   -0.34    0.63 
   9  -6   2    0.84    0.81 
  -9   6  -2   -0.41    0.77 
   9   6   2    0.07    0.87 
   9  -7  -2   -0.14    0.74 
   9  -7  -2    1.60    0.75 
   9  -7  -2    0.67    0.74 
   9  -7  -2   -0.51    0.44 
   9  -7  -2    0.34    0.61 
  -9   7   2   -0.55    0.68 
   8  -7  -2    5.93    1.09 
   8  -7  -2    5.87    1.09 
   8  -7  -2    4.92    1.19 
  -8  -7   2    1.98    1.06 
   8  -7  -2    6.65    1.50 
   8  -7  -2    7.15    0.97 
  -8   7   2    6.13    1.29 
   8   7  -2    5.15    1.13 
   7  -7  -2    4.28    0.96 
   7  -7  -2    3.66    0.91 
  -7  -7   2    3.95    1.15 
   7  -7  -2    2.39    0.95 
   7  -7  -2    3.20    1.08 
  -7   7   2    2.34    0.94 
   7   7  -2    3.04    0.94 
  -6  -7   2    2.07    0.92 
   6  -7  -2    0.71    0.61 
   6  -7  -2    1.12    0.51 
   6  -7  -2    1.12    0.62 
   6  -7  -2    1.59    0.76 
   6  -7  -2    1.11    0.84 
  -6   7   2    0.49    0.61 
   6   7  -2    1.27    0.63 
  -6   7   2    1.64    0.68 
   5  -7  -2   14.67    1.37 
  -5  -7   2   10.77    1.18 
  -5  -7   2   11.74    1.40 
   5  -7  -2   12.22    1.21 
   5  -7  -2   13.23    1.26 
   5  -7  -2   13.23    1.33 
   5  -7  -2   13.49    1.15 
   5   7  -2   11.39    1.12 
  -5   7   2   14.64    1.38 
  -5   7   2   15.41    1.24 
   5   7  -2   10.78    0.60 
   5   7  -2   11.38    0.60 
  -4  -7   2   47.69    2.71 
   4  -7  -2   51.95    2.87 
   4  -7  -2   45.71    2.68 
   4  -7  -2   52.86    2.72 
   4  -7  -2   49.32    2.83 
   4  -7  -2   50.69    2.82 
   4  -7  -2   47.75    2.73 
  -4  -7   2   50.00    2.97 
   4  -7  -2   47.95    2.66 
   4  -7  -2   48.84    2.63 
  -4  -7   2   49.50    2.72 
   4   7  -2   45.60    2.18 
   4   7  -2   49.40    2.60 
  -4   7   2   56.21    2.93 
  -4   7   2   47.79    2.69 
  -4   7   2   48.44    2.82 
   4   7  -2   45.34    2.18 
  -4   7   2   51.00    2.68 
   4   7  -2   47.29    2.22 
   4   7  -2   49.22    2.19 
  -4   7   2   49.82    2.74 
   4   7  -2   44.98    2.21 
  -4   7   2   47.74    2.70 
  -4   7   2   51.48    2.73 
   3  -7  -2    5.72    0.75 
   3  -7  -2    6.17    0.81 
  -3  -7   2    6.09    0.71 
   3  -7  -2    7.42    0.95 
   3  -7  -2    5.36    0.73 
   3  -7  -2    6.42    0.74 
   3  -7  -2    5.48    0.77 
  -3  -7   2    4.74    0.71 
   3  -7  -2    6.01    0.70 
   3  -7  -2    6.36    0.76 
   3  -7  -2    5.42    0.78 
  -3  -7   2    4.45    0.77 
   3  -7  -2    6.24    0.85 
   3   7  -2    5.42    0.52 
   3   7  -2    5.74    0.65 
   3   7  -2    5.61    0.52 
   3   7  -2    4.92    0.50 
  -3   7   2    6.53    0.75 
  -3   7   2    5.60    0.79 
  -3   7   2    6.34    0.77 
   3   7  -2    5.11    0.48 
   3   7  -2    5.51    0.48 
  -3   7   2    6.19    0.75 
  -3   7   2    6.48    0.93 
   3   7  -2    5.47    0.55 
  -3   7   2    6.06    0.81 
   3   7  -2    5.64    0.52 
  -3   7   2    5.72    0.74 
  -2  -7   2   19.79    1.23 
   2  -7  -2   19.84    1.31 
   2  -7  -2   16.71    1.31 
  -2  -7   2   18.62    1.13 
   2  -7  -2   18.00    1.33 
   2  -7  -2   20.92    1.37 
   2  -7  -2   18.95    1.28 
  -2  -7   2   16.97    1.25 
  -2  -7   2   17.80    1.11 
  -2  -7   2   19.10    1.48 
  -2  -7   2   17.49    1.26 
   2  -7  -2   18.08    1.27 
  -2   7   2   18.39    1.28 
  -2   7   2   18.34    1.27 
   2   7  -2   22.51    1.17 
   2   7  -2   16.88    1.08 
   2   7  -2   20.47    1.20 
   2   7  -2   20.18    1.14 
   2   7  -2   19.75    0.97 
  -2   7   2   19.77    1.35 
   2   7  -2   18.75    1.12 
   2   7  -2   18.31    0.97 
  -2   7   2   16.90    1.29 
   2   7  -2   15.61    1.28 
   2   7  -2   17.70    1.11 
  -2   7   2   18.69    1.35 
  -2   7   2   20.16    1.41 
   2   7  -2   18.11    1.09 
  -2   7   2   18.98    1.33 
   2   7  -2   16.79    1.07 
  -2   7   2   17.76    1.31 
   1  -7  -2   12.96    1.02 
   1  -7  -2   11.29    0.93 
   1  -7  -2   12.30    0.93 
   1  -7  -2   12.15    0.86 
  -1  -7   2    8.97    0.80 
   1  -7  -2   12.99    0.88 
  -1  -7   2   10.19    0.85 
   1  -7  -2   11.22    0.93 
  -1  -7   2   10.95    0.86 
  -1  -7   2   11.39    0.68 
  -1  -7   2    9.50    0.69 
  -1  -7   2   11.85    0.92 
  -1  -7   2   10.24    0.87 
  -1  -7   2   11.20    0.87 
  -1  -7   2   11.48    1.01 
  -1  -7   2   11.62    0.80 
   1   7  -2   11.32    0.85 
  -1   7   2   11.01    0.94 
  -1   7   2   11.82    0.95 
   1   7  -2   11.25    0.87 
   1   7  -2   11.62    0.88 
  -1   7   2   10.78    0.90 
   1   7  -2    9.71    0.96 
   1   7  -2   10.78    0.81 
  -1   7   2   12.56    0.81 
  -1   7   2   12.37    0.91 
  -1   7   2   10.45    0.90 
  -1   7   2    8.90    0.87 
   1   7  -2   11.59    0.86 
  -1   7   2   10.83    0.95 
   1   7  -2   10.24    0.89 
   1   7  -2   10.64    0.84 
   1   7  -2   10.65    0.84 
   1   7  -2   11.31    0.82 
   1   7  -2   13.26    0.80 
  -1   7   2    9.07    0.99 
   0  -7   2   32.37    1.85 
   0  -7   2   31.51    1.71 
   0  -7   2   32.62    1.83 
   0  -7  -2   31.54    1.60 
   0  -7   2   32.02    1.82 
   0  -7   2   31.74    1.90 
   0  -7  -2   33.40    1.82 
   0  -7   2   30.28    1.82 
   0  -7  -2   29.47    1.82 
   0  -7   2   30.49    1.81 
   0  -7  -2   34.37    1.65 
   0  -7  -2   32.09    1.84 
   0  -7  -2   28.98    1.90 
   0  -7   2   29.37    1.79 
   0   7   2   34.91    1.84 
   0   7  -2   32.29    1.67 
   0   7   2   36.81    1.53 
   0   7   2   31.96    1.67 
   0   7  -2   33.69    1.83 
   0   7   2   33.23    1.61 
   0   7   2   32.87    1.86 
   0   7   2   34.49    1.87 
   0   7  -2   30.73    1.82 
   0   7  -2   34.69    1.86 
   0   7  -2   36.65    1.69 
   0   7   2   32.63    1.93 
   0   7   2   35.68    1.88 
   0   7  -2   34.68    1.94 
   0   7   2   33.03    1.83 
   0   7  -2   35.20    1.82 
   0   7  -2   33.26    1.83 
   0   7  -2   32.57    1.57 
   0   7   2   33.55    1.94 
   0   7  -2   33.30    1.64 
   0   7  -2   32.82    1.83 
   0   7   2   35.69    1.87 
   0   7   2   36.89    1.88 
   0   7   2   30.55    1.79 
   0   7   2   35.46    1.86 
   0   7  -2   31.35    1.79 
   0   7  -2   33.97    1.93 
   0   7  -2   31.14    1.83 
  -1  -7  -2    3.26    0.50 
  -1  -7  -2    2.95    0.50 
  -1  -7  -2    4.18    0.63 
  -1  -7  -2    3.66    0.41 
  -1  -7  -2    3.32    0.29 
  -1  -7  -2    3.86    0.35 
  -1  -7  -2    4.08    0.56 
   1  -7   2    4.15    0.59 
   1  -7   2    3.30    0.53 
   1  -7   2    3.85    0.61 
   1  -7   2    3.89    0.59 
   1  -7   2    4.21    0.62 
   1  -7   2    3.88    0.62 
   1  -7   2    3.16    0.60 
   1   7   2    4.79    0.62 
   1   7   2    4.01    0.31 
   1   7   2    3.15    0.51 
  -1   7  -2    3.94    0.66 
   1   7   2    2.64    0.51 
   1   7   2    3.77    0.53 
  -1   7  -2    4.33    0.56 
  -1   7  -2    3.00    0.58 
   1   7   2    3.63    0.58 
  -1   7  -2    3.58    0.49 
  -1   7  -2    3.16    0.60 
   1   7   2    4.35    0.38 
   1   7   2    4.02    0.48 
   1   7   2    3.94    0.55 
  -1   7  -2    3.20    0.56 
  -1   7  -2    2.79    0.50 
   1   7   2    4.26    0.68 
   1   7   2    4.64    0.51 
   1   7   2    3.36    0.48 
   1   7   2    2.88    0.51 
  -1   7  -2    2.24    0.61 
  -2  -7  -2    2.89    0.31 
  -2  -7  -2    3.05    0.29 
  -2  -7  -2    2.10    0.41 
   2  -7   2    4.54    0.69 
   2  -7   2    4.15    0.67 
  -2  -7  -2    3.62    0.28 
   2  -7   2    3.80    0.67 
   2  -7   2    3.98    0.59 
  -2  -7  -2    3.08    0.33 
  -2  -7  -2    2.94    0.44 
   2  -7   2    2.18    0.48 
   2  -7   2    3.98    0.54 
  -2  -7  -2    2.96    0.47 
  -2  -7  -2    3.31    0.36 
   2  -7   2    2.68    0.64 
  -2  -7  -2    3.28    0.59 
   2   7   2    3.25    0.38 
   2   7   2    2.77    0.49 
  -2   7  -2    3.89    0.68 
   2   7   2    3.68    0.43 
  -2   7  -2    2.91    0.53 
   2   7   2    2.92    0.55 
   2   7   2    2.63    0.45 
   2   7   2    3.47    0.48 
  -2   7  -2    2.83    0.59 
  -2   7  -2    3.06    0.69 
   2   7   2    3.02    0.46 
   2   7   2    3.64    0.49 
   2   7   2    2.75    0.52 
  -2   7  -2    3.83    0.63 
   2   7   2    2.86    0.45 
  -2   7  -2    3.00    0.64 
  -2   7  -2    2.78    0.60 
   3  -7   2   74.90    3.66 
   3  -7   2   82.35    3.91 
   3  -7   2   75.97    3.84 
  -3  -7  -2   81.60    3.56 
   3  -7   2   75.60    3.83 
   3  -7   2   83.80    3.94 
  -3  -7  -2   80.13    3.57 
   3  -7   2   76.67    3.88 
   3  -7   2   76.60    3.97 
  -3  -7  -2   79.92    3.98 
  -3   7  -2   81.52    3.90 
   3   7   2   80.55    3.58 
   3   7   2   68.90    3.54 
  -3   7  -2   73.41    3.85 
   3   7   2   80.36    3.57 
   3   7   2   79.98    3.52 
  -3   7  -2   77.90    3.84 
   3   7   2   72.18    3.61 
  -3   7  -2   76.43    4.00 
   3   7   2   75.31    3.85 
  -3   7  -2   76.07    3.87 
  -3   7  -2   79.46    3.91 
   3   7   2   75.10    3.54 
  -3   7  -2   77.40    3.89 
   3   7   2   76.24    3.57 
  -4  -7  -2    2.60    0.68 
   4  -7   2    2.29    0.70 
   4  -7   2    3.35    0.78 
   4  -7   2    2.61    0.59 
   4  -7   2    2.28    0.69 
   4  -7   2    2.95    0.68 
   4  -7   2    2.76    0.50 
   4  -7   2    3.83    0.87 
   4  -7   2    1.95    0.65 
   4  -7   2    2.57    0.64 
   4  -7   2    2.87    0.70 
   4   7   2    3.29    0.50 
   4   7   2    3.08    0.44 
  -4   7  -2    2.81    0.73 
   4   7   2    3.62    0.38 
   4   7   2    2.39    0.44 
  -4   7  -2    3.13    0.74 
   4   7   2    3.05    0.41 
  -4   7  -2    2.50    0.69 
  -4   7  -2    2.86    0.63 
   4   7   2    3.16    0.77 
   4   7   2    3.48    0.48 
  -4   7  -2    2.35    0.70 
  -4   7  -2    2.53    0.76 
  -4   7  -2    3.46    0.70 
   4   7   2    3.55    0.46 
   5  -7   2   48.83    2.86 
  -5  -7  -2   47.34    2.94 
   5  -7   2   54.22    2.84 
   5  -7   2   49.17    2.85 
   5  -7   2   51.64    3.10 
   5  -7   2   50.91    3.13 
   5  -7   2   54.85    2.57 
   5  -7   2   45.76    2.82 
  -5   7  -2   46.30    2.97 
   5   7   2   50.03    2.31 
  -5   7  -2   51.43    2.87 
   5   7   2   49.31    2.40 
   5   7   2   45.23    2.60 
   5   7   2   51.20    2.35 
   5   7   2   48.41    2.34 
   5   7   2   48.49    2.94 
   5   7   2   48.03    2.65 
   6  -7   2   16.55    1.53 
   6  -7   2   16.33    1.67 
   6  -7   2   18.08    1.58 
  -6  -7  -2   16.06    1.61 
   6  -7   2   16.90    1.58 
   6  -7   2   20.54    1.50 
   6  -7   2   17.94    1.72 
  -6   7  -2   18.02    1.59 
   6   7   2   15.42    1.52 
   6   7   2   17.85    1.46 
   6   7   2   18.04    0.84 
   6   7   2   18.03    1.03 
   6   7   2   15.66    1.39 
  -6   7  -2   17.04    1.79 
   6   7   2   16.41    0.99 
   6   7   2   18.22    0.84 
   7  -7   2   -0.40    0.74 
   7  -7   2    0.27    0.61 
  -7  -7  -2    1.64    0.80 
   7  -7   2    1.19    0.72 
   7  -7   2   -0.23    0.55 
   7  -7   2    0.93    0.63 
   7   7   2    0.41    0.18 
   7   7   2    0.85    0.62 
  -7   7  -2    0.10    0.64 
   7   7   2    1.09    0.62 
   7   7   2    0.56    0.18 
   8  -7   2    1.35    0.83 
   8  -7   2    2.11    1.08 
   8  -7   2    1.75    0.83 
   8  -7   2    2.22    1.03 
  -8   7  -2    1.85    1.25 
   8   7   2    1.91    1.08 
   9  -7   2    0.78    0.78 
   9  -7   2   -0.08    0.72 
   9  -7   2    0.46    0.91 
   9  -7   2    0.48    0.99 
  -9   7  -2   -0.19    0.84 
   9   7   2   -1.03    0.81 
   9  -8  -2    0.23    0.57 
   9  -8  -2    0.18    1.00 
   9  -8  -2    0.16    0.63 
   9  -8  -2    2.14    0.88 
   9  -8  -2    0.03    0.91 
  -9   8   2    0.23    0.84 
   8  -8  -2    8.32    1.45 
   8  -8  -2    9.02    1.31 
  -8  -8   2    8.26    1.53 
   8  -8  -2    8.50    1.39 
   8  -8  -2   10.06    1.71 
  -8   8   2    7.41    1.39 
   8   8  -2    7.38    1.16 
   7  -8  -2    5.76    1.41 
   7  -8  -2    8.53    1.35 
  -7  -8   2   10.26    1.56 
   7  -8  -2   10.68    1.36 
   7  -8  -2   11.27    1.33 
  -7   8   2    9.57    1.39 
   7   8  -2    6.42    1.14 
   6  -8  -2   -0.44    0.55 
  -6  -8   2    0.82    0.62 
   6  -8  -2    0.43    0.57 
   6  -8  -2    0.27    0.58 
  -6  -8   2    0.21    0.54 
   6  -8  -2    0.02    0.53 
  -6  -8   2   -0.60    0.68 
   6  -8  -2    0.56    0.52 
  -6   8   2   -0.17    0.48 
  -6   8   2   -0.85    0.52 
   6   8  -2    0.77    0.58 
  -5  -8   2    2.07    0.78 
   5  -8  -2    1.74    0.61 
   5  -8  -2    1.37    0.77 
   5  -8  -2    2.71    0.65 
  -5  -8   2    2.68    0.74 
   5  -8  -2    1.88    0.81 
   5  -8  -2    2.53    0.80 
  -5  -8   2    3.36    0.75 
   5   8  -2    1.94    0.32 
  -5   8   2    1.49    0.67 
  -5   8   2    3.08    0.83 
   5   8  -2    2.23    0.64 
   5   8  -2    2.18    0.30 
   4  -8  -2   81.07    3.99 
   4  -8  -2   78.47    3.44 
   4  -8  -2   80.27    4.04 
  -4  -8   2   67.53    4.13 
   4  -8  -2   82.16    4.17 
   4  -8  -2   75.32    4.01 
  -4  -8   2   79.08    3.99 
   4  -8  -2   84.57    4.20 
   4  -8  -2   81.72    3.99 
  -4  -8   2   73.84    3.92 
   4   8  -2   75.26    3.34 
   4   8  -2   78.56    3.49 
  -4   8   2   79.90    4.05 
  -4   8   2   86.68    4.10 
   4   8  -2   73.56    3.34 
  -4   8   2   82.94    4.05 
  -4   8   2   86.00    4.12 
  -4   8   2   76.50    4.10 
   4   8  -2   79.51    3.51 
   4   8  -2   80.95    3.52 
   4   8  -2   73.10    3.47 
   4   8  -2   77.07    3.83 
   4   8  -2   75.91    3.50 
  -4   8   2   76.97    3.95 
  -4   8   2   80.44    4.21 
   3  -8  -2  105.60    5.10 
   3  -8  -2  106.15    5.08 
  -3  -8   2  101.92    4.97 
   3  -8  -2  104.63    5.05 
   3  -8  -2  107.66    5.07 
  -3  -8   2  104.15    5.02 
   3  -8  -2  105.03    5.07 
   3  -8  -2  106.14    5.11 
  -3  -8   2  111.94    5.34 
   3   8  -2  101.65    4.63 
   3   8  -2  108.91    4.66 
   3   8  -2  106.61    4.84 
  -3   8   2  110.17    5.11 
  -3   8   2  113.78    5.15 
   3   8  -2   88.17    4.63 
  -3   8   2  113.16    5.16 
  -3   8   2  101.73    5.20 
  -3   8   2  105.55    5.06 
   3   8  -2  101.49    4.68 
  -3   8   2  111.67    5.10 
  -3   8   2  107.89    5.03 
   3   8  -2  106.07    4.75 
   3   8  -2  102.59    4.68 
   3   8  -2  108.25    4.70 
  -2  -8   2   14.43    1.01 
  -2  -8   2   15.78    1.14 
   2  -8  -2   12.40    1.07 
  -2  -8   2   12.46    1.26 
  -2  -8   2   12.20    1.05 
   2  -8  -2   15.19    1.16 
  -2  -8   2   15.34    1.02 
   2  -8  -2   12.40    1.07 
   2  -8  -2   14.44    1.16 
  -2  -8   2   13.19    1.05 
   2  -8  -2   13.87    1.20 
   2  -8  -2   14.72    1.08 
  -2   8   2   14.69    1.19 
   2   8  -2   14.32    1.25 
  -2   8   2   13.13    1.11 
  -2   8   2   13.84    1.15 
  -2   8   2   14.34    1.17 
   2   8  -2   14.29    0.96 
  -2   8   2   13.40    1.09 
   2   8  -2   12.19    0.92 
   2   8  -2   10.57    0.93 
  -2   8   2   14.18    1.29 
   2   8  -2   14.26    0.84 
  -2   8   2   13.73    1.17 
   2   8  -2   12.97    0.97 
   2   8  -2   12.29    0.99 
   2   8  -2   13.61    0.98 
  -2   8   2   13.72    1.11 
   2   8  -2   13.61    0.95 
   2   8  -2   15.75    0.99 
   2   8  -2   12.89    0.83 
   1  -8  -2   21.13    1.54 
   1  -8  -2   22.69    1.54 
   1  -8  -2   24.06    1.62 
  -1  -8   2   25.07    1.51 
  -1  -8   2   23.30    1.64 
   1  -8  -2   23.75    1.40 
   1  -8  -2   22.14    1.40 
  -1  -8   2   21.84    1.46 
  -1  -8   2   27.46    1.55 
  -1  -8   2   26.77    1.56 
  -1  -8   2   24.90    1.31 
  -1  -8   2   26.28    1.37 
   1  -8  -2   23.10    1.52 
  -1  -8   2   21.25    1.44 
  -1  -8   2   24.38    1.46 
   1   8  -2   25.56    1.41 
  -1   8   2   25.39    1.56 
   1   8  -2   25.46    1.47 
  -1   8   2   24.27    1.48 
  -1   8   2   24.34    1.58 
   1   8  -2   23.19    1.34 
  -1   8   2   20.94    1.50 
   1   8  -2   24.48    1.46 
   1   8  -2   24.44    1.47 
  -1   8   2   24.21    1.36 
  -1   8   2   22.26    1.60 
  -1   8   2   22.37    1.50 
   1   8  -2   23.33    1.40 
   1   8  -2   23.66    1.44 
  -1   8   2   24.46    1.51 
   1   8  -2   23.54    1.54 
   1   8  -2   23.63    1.47 
   1   8  -2   22.57    1.45 
   1   8  -2   28.40    1.69 
  -1   8   2   22.40    1.53 
   0  -8   2  135.85    6.43 
   0  -8  -2  143.25    6.46 
   0  -8   2  144.17    6.56 
   0  -8   2  149.91    6.47 
   0  -8   2  146.98    6.42 
   0  -8  -2  134.34    6.56 
   0  -8   2  134.23    6.39 
   0  -8   2  150.42    6.29 
   0  -8   2  144.79    6.46 
   0  -8  -2  145.93    6.20 
   0  -8  -2  143.49    6.46 
   0  -8   2  133.29    6.42 
   0  -8  -2  136.60    6.39 
   0  -8  -2  143.60    6.15 
   0   8  -2  139.81    6.22 
   0   8   2  144.21    6.55 
   0   8   2  146.68    6.46 
   0   8  -2  142.84    6.19 
   0   8   2  142.61    6.40 
   0   8  -2  142.04    6.40 
   0   8  -2  137.72    6.13 
   0   8  -2  147.03    6.45 
   0   8   2  142.61    6.43 
   0   8   2  150.77    6.45 
   0   8   2  147.97    6.43 
   0   8   2  138.13    6.11 
   0   8   2  141.79    6.56 
   0   8   2  140.80    6.39 
   0   8  -2  147.21    6.46 
   0   8   2  140.37    6.03 
   0   8   2  137.65    6.18 
   0   8   2  145.41    6.45 
   0   8  -2  150.66    6.44 
   0   8  -2  137.33    6.53 
   0   8  -2  143.61    6.41 
   0   8   2  145.83    6.41 
   0   8  -2  145.73    6.54 
   0   8   2  149.71    6.45 
   0   8  -2  146.18    6.41 
   0   8  -2  141.04    6.42 
   0   8  -2  134.40    6.06 
   0   8  -2  142.11    6.38 
  -1  -8  -2   61.29    2.69 
  -1  -8  -2   57.74    3.03 
   1  -8   2   64.27    3.13 
   1  -8   2   60.81    3.14 
   1  -8   2   63.55    3.17 
   1  -8   2   65.09    3.17 
  -1  -8  -2   59.30    3.01 
   1  -8   2   66.28    3.16 
   1  -8   2   59.64    3.12 
   1  -8   2   63.22    3.16 
  -1  -8  -2   54.97    3.01 
  -1  -8  -2   50.10    3.15 
  -1  -8  -2   60.64    2.75 
   1   8   2   60.20    3.03 
  -1   8  -2   62.68    3.02 
   1   8   2   61.30    3.03 
  -1   8  -2   61.76    3.11 
  -1   8  -2   65.93    2.99 
  -1   8  -2   60.74    3.12 
  -1   8  -2   67.91    3.18 
   1   8   2   61.20    3.12 
   1   8   2   56.65    2.95 
  -1   8  -2   61.89    3.20 
   1   8   2   62.99    2.73 
   1   8   2   62.74    3.03 
   1   8   2   65.31    2.99 
  -1   8  -2   63.65    3.16 
  -1   8  -2   65.93    3.27 
   1   8   2   60.28    3.00 
   1   8   2   58.47    3.10 
   1   8   2   50.51    3.14 
   1   8   2   60.27    3.03 
   1   8   2   61.52    3.02 
  -2  -8  -2    4.23    0.40 
  -2  -8  -2    3.12    0.64 
  -2  -8  -2    4.11    0.34 
   2  -8   2    4.12    0.66 
   2  -8   2    3.09    0.67 
  -2  -8  -2    4.64    0.61 
  -2  -8  -2    5.32    0.41 
   2  -8   2    2.57    0.56 
   2  -8   2    4.61    0.68 
  -2  -8  -2    5.74    0.45 
  -2  -8  -2    4.90    0.39 
   2  -8   2    4.66    0.76 
   2  -8   2    2.98    0.57 
   2  -8   2    3.92    0.70 
  -2  -8  -2    4.19    0.58 
  -2   8  -2    3.44    0.62 
   2   8   2    2.84    0.53 
   2   8   2    4.65    0.63 
  -2   8  -2    2.75    0.59 
   2   8   2    4.61    0.58 
   2   8   2    4.76    0.68 
   2   8   2    3.83    0.55 
  -2   8  -2    4.78    0.88 
   2   8   2    3.88    0.59 
  -2   8  -2    3.14    0.51 
   2   8   2    3.12    0.58 
   2   8   2    5.34    0.54 
   2   8   2    4.38    0.58 
   2   8   2    4.15    0.47 
  -2   8  -2    2.66    0.62 
  -2   8  -2    4.97    0.78 
  -2   8  -2    3.49    0.69 
  -3  -8  -2    0.48    0.43 
   3  -8   2    0.08    0.37 
  -3  -8  -2   -0.05    0.21 
   3  -8   2   -0.31    0.45 
   3  -8   2   -0.02    0.43 
   3  -8   2    0.19    0.52 
   3  -8   2   -0.02    0.34 
   3  -8   2    0.65    0.52 
  -3  -8  -2    0.36    0.26 
   3  -8   2   -0.07    0.43 
   3   8   2    0.29    0.33 
  -3   8  -2    0.36    0.47 
   3   8   2    0.31    0.29 
  -3   8  -2   -0.92    0.44 
   3   8   2   -0.12    0.24 
   3   8   2    0.43    0.28 
  -3   8  -2   -0.07    0.46 
   3   8   2    0.16    0.29 
   3   8   2    0.17    0.28 
   3   8   2    1.17    0.45 
  -3   8  -2   -0.02    0.35 
  -3   8  -2   -0.06    0.33 
  -3   8  -2    0.03    0.49 
  -3   8  -2    0.91    0.44 
   3   8   2   -0.07    0.26 
   4  -8   2   57.38    3.09 
  -4  -8  -2   48.64    3.04 
   4  -8   2   55.02    3.01 
  -4  -8  -2   52.86    2.73 
   4  -8   2   53.36    3.06 
  -4  -8  -2   53.52    2.73 
   4  -8   2   52.17    3.02 
   4  -8   2   52.34    3.13 
   4  -8   2   49.21    3.09 
   4  -8   2   56.70    2.79 
  -4   8  -2   55.78    3.08 
  -4   8  -2   55.90    3.06 
   4   8   2   51.08    2.61 
  -4   8  -2   62.15    3.17 
  -4   8  -2   52.75    3.02 
   4   8   2   53.12    2.50 
   4   8   2   55.39    2.61 
  -4   8  -2   54.76    3.00 
  -4   8  -2   54.59    3.19 
   4   8   2   51.52    2.66 
   4   8   2   55.73    2.60 
   4   8   2   51.01    2.61 
   4   8   2   53.68    3.04 
  -4   8  -2   51.06    2.99 
   4   8   2   53.19    2.55 
   5  -8   2   24.99    1.79 
   5  -8   2   22.39    1.91 
  -5  -8  -2   21.06    1.88 
   5  -8   2   22.67    1.50 
   5  -8   2   26.14    1.90 
   5  -8   2   22.60    1.99 
   5  -8   2   23.72    1.84 
   5  -8   2   18.79    1.72 
   5   8   2   25.25    1.31 
   5   8   2   25.23    1.37 
   5   8   2   26.30    1.37 
  -5   8  -2   21.20    1.84 
   5   8   2   23.68    1.35 
   5   8   2   26.02    1.42 
  -5   8  -2   24.23    1.85 
   5   8   2   21.05    1.80 
   6  -8   2    6.02    1.10 
   6  -8   2    4.28    0.87 
  -6  -8  -2    3.63    1.02 
   6  -8   2    4.83    1.05 
   6  -8   2    4.41    0.98 
   6  -8   2    4.30    1.19 
   6  -8   2    3.87    0.81 
   6   8   2    5.75    0.40 
  -6   8  -2    5.62    1.23 
   6   8   2    5.73    0.41 
   6   8   2    5.29    0.58 
   6   8   2    5.82    0.56 
   6   8   2    4.93    0.91 
  -6   8  -2    4.72    1.08 
   7  -8   2    9.81    1.44 
   7  -8   2   10.28    1.60 
   7  -8   2   10.07    1.34 
   7  -8   2   10.49    1.31 
   7  -8   2   10.34    1.37 
  -7  -8  -2    7.06    1.38 
  -7   8  -2   11.18    1.65 
   7   8   2    8.81    0.53 
   7   8   2    6.18    1.08 
   7   8   2    8.40    0.53 
   8  -8   2   10.18    1.59 
   8  -8   2   15.24    1.72 
   8  -8   2   10.57    1.60 
   8  -8   2   10.87    1.49 
   8   8   2   13.98    1.74 
  -8   8  -2   13.68    1.98 
   8  -9  -2    5.68    1.17 
   8  -9  -2    5.18    1.25 
   8  -9  -2    5.08    1.23 
   8  -9  -2    3.43    1.20 
  -8  -9   2    5.57    1.44 
   8   9  -2    2.45    1.01 
  -8   9   2    2.28    1.31 
  -7  -9   2    1.52    0.99 
   7  -9  -2    0.39    0.86 
   7  -9  -2    1.54    0.84 
   7  -9  -2   -0.07    0.67 
   7  -9  -2    0.12    0.89 
   7   9  -2    0.55    0.52 
  -7   9   2    2.04    1.09 
   6  -9  -2    3.18    1.04 
   6  -9  -2    3.20    0.84 
   6  -9  -2    2.18    0.83 
  -6  -9   2    2.98    0.90 
   6  -9  -2    3.10    0.97 
  -6  -9   2    4.61    1.26 
  -6  -9   2    2.08    0.80 
   6  -9  -2    2.96    0.79 
   6   9  -2    2.05    0.76 
  -6   9   2    4.36    1.06 
  -6   9   2    2.15    1.02 
   5  -9  -2   26.77    1.82 
   5  -9  -2   22.95    1.86 
  -5  -9   2   22.28    1.78 
  -5  -9   2   22.25    2.09 
  -5  -9   2   26.26    1.87 
   5  -9  -2   27.87    2.01 
   5  -9  -2   25.14    1.97 
   5  -9  -2   27.29    2.03 
   5   9  -2   24.84    1.71 
  -5   9   2   21.30    1.94 
   5   9  -2   24.14    1.29 
   5   9  -2   24.06    1.21 
   5   9  -2   24.51    1.15 
   5   9  -2   22.47    1.27 
   5   9  -2   23.63    1.20 
  -5   9   2   24.56    1.89 
   4  -9  -2   34.94    2.24 
   4  -9  -2   33.80    2.14 
   4  -9  -2   35.09    2.21 
   4  -9  -2   31.97    2.23 
  -4  -9   2   33.34    2.37 
   4  -9  -2   31.38    2.22 
  -4  -9   2   32.04    2.10 
  -4  -9   2   31.11    2.07 
   4  -9  -2   33.75    2.24 
  -4   9   2   32.98    2.21 
   4   9  -2   32.80    1.97 
  -4   9   2   28.27    2.17 
   4   9  -2   32.41    1.61 
   4   9  -2   32.77    1.71 
  -4   9   2   33.10    2.26 
  -4   9   2   33.58    2.16 
   4   9  -2   33.31    1.74 
  -4   9   2   32.94    2.16 
   4   9  -2   33.82    1.61 
   4   9  -2   33.12    1.71 
  -4   9   2   33.21    2.37 
  -4   9   2   34.15    2.17 
   4   9  -2   33.06    1.73 
   4   9  -2   32.98    1.73 
   3  -9  -2   17.15    1.39 
   3  -9  -2   15.91    1.34 
   3  -9  -2   13.75    1.35 
  -3  -9   2   13.30    1.20 
   3  -9  -2   14.57    1.27 
  -3  -9   2   16.54    1.28 
   3  -9  -2   16.93    1.39 
   3  -9  -2   15.39    1.31 
  -3  -9   2   14.39    1.50 
   3   9  -2   15.78    1.07 
  -3   9   2   15.94    1.36 
   3   9  -2   15.66    1.01 
   3   9  -2   15.46    1.05 
  -3   9   2   14.75    1.42 
   3   9  -2   16.33    1.13 
  -3   9   2   15.12    1.30 
   3   9  -2   16.92    1.08 
  -3   9   2   15.51    1.35 
  -3   9   2   15.08    1.36 
   3   9  -2   15.18    1.04 
  -3   9   2   15.17    1.41 
   3   9  -2   14.69    1.10 
   3   9  -2   14.22    0.99 
  -3   9   2   15.86    1.38 
  -3   9   2   14.11    1.35 
  -2  -9   2  179.56    7.64 
  -2  -9   2  172.08    8.36 
  -2  -9   2  178.68    7.88 
  -2  -9   2  173.47    7.72 
  -2  -9   2  187.57    8.15 
   2  -9  -2  187.24    8.14 
   2  -9  -2  180.32    8.19 
  -2  -9   2  188.62    8.09 
  -2  -9   2  176.96    8.09 
   2  -9  -2  189.02    8.12 
   2  -9  -2  177.00    8.21 
   2  -9  -2  190.89    8.32 
   2  -9  -2  184.44    8.25 
  -2  -9   2  188.33    7.67 
  -2   9   2  189.02    8.40 
  -2   9   2  188.10    8.26 
  -2   9   2  184.82    8.18 
   2   9  -2  187.01    7.95 
  -2   9   2  179.31    8.22 
   2   9  -2  175.28    7.91 
   2   9  -2  182.83    7.78 
   2   9  -2  187.31    7.98 
   2   9  -2  170.43    8.28 
   2   9  -2  183.05    7.91 
   2   9  -2  185.94    7.95 
   2   9  -2  178.96    7.78 
  -2   9   2  177.22    8.20 
  -2   9   2  187.61    8.21 
  -2   9   2  169.40    8.08 
   2   9  -2  177.70    8.03 
  -2   9   2  180.30    8.18 
   2   9  -2  180.33    7.93 
   2   9  -2  171.91    7.93 
  -1  -9   2  143.11    7.26 
   1  -9  -2  144.01    7.15 
  -1  -9   2  165.21    7.06 
   1  -9  -2  151.50    7.27 
   1  -9  -2  157.49    6.96 
  -1  -9   2  155.99    7.07 
   1  -9  -2  157.54    6.99 
  -1  -9   2  167.13    6.87 
  -1  -9   2  153.02    7.07 
  -1  -9   2  157.37    7.08 
  -1  -9   2  165.62    7.08 
  -1  -9   2  152.23    7.06 
   1  -9  -2  153.41    7.18 
   1  -9  -2  154.00    7.15 
  -1   9   2  157.49    7.24 
   1   9  -2  164.16    7.06 
  -1   9   2  152.09    7.17 
   1   9  -2  152.59    7.01 
  -1   9   2  170.82    7.36 
  -1   9   2  159.57    6.88 
   1   9  -2  156.70    7.28 
  -1   9   2  158.44    7.16 
  -1   9   2  158.59    7.18 
   1   9  -2  160.14    6.91 
  -1   9   2  158.35    7.15 
   1   9  -2  156.82    7.02 
   1   9  -2  163.54    7.00 
  -1   9   2  166.36    7.16 
   1   9  -2  147.67    7.01 
   1   9  -2  161.57    7.04 
   1   9  -2  166.77    7.18 
   1   9  -2  160.64    7.07 
  -1   9   2  154.94    7.01 
   1   9  -2  151.23    6.93 
   0  -9   2    6.50    0.81 
   0  -9  -2    5.25    0.74 
   0  -9  -2    5.22    0.76 
   0  -9  -2    5.91    0.54 
   0  -9  -2    4.40    0.73 
   0  -9   2    4.54    0.71 
   0  -9  -2    4.99    0.55 
   0  -9   2    6.34    0.72 
   0  -9   2    5.22    0.73 
   0  -9  -2    5.70    0.69 
   0  -9   2    5.37    0.72 
   0  -9   2    4.77    0.64 
   0  -9   2    4.96    0.82 
   0   9   2    4.56    0.70 
   0   9  -2    5.18    0.72 
   0   9  -2    4.94    0.74 
   0   9  -2    5.47    0.51 
   0   9  -2    6.07    0.78 
   0   9   2    5.89    0.57 
   0   9   2    4.11    0.79 
   0   9  -2    5.47    0.73 
   0   9   2    5.01    0.67 
   0   9  -2    5.23    0.45 
   0   9  -2    4.92    0.84 
   0   9   2    6.54    0.74 
   0   9   2    5.40    0.70 
   0   9  -2    5.09    0.70 
   0   9  -2    6.09    0.59 
   0   9  -2    7.11    0.83 
   0   9   2    3.77    0.73 
   0   9   2    4.21    0.69 
   0   9   2    5.83    0.43 
   0   9   2    4.97    0.77 
   0   9  -2    5.77    0.54 
   0   9   2    6.43    0.52 
   0   9  -2    5.26    0.68 
   0   9   2    5.14    0.69 
   0   9   2    5.01    0.80 
   0   9  -2    5.55    0.70 
   0   9  -2    4.50    0.75 
   0   9   2    5.67    0.71 
   1  -9   2    5.08    0.79 
  -1  -9  -2    6.09    0.53 
  -1  -9  -2    6.59    0.48 
   1  -9   2    6.01    0.77 
  -1  -9  -2    6.36    0.76 
  -1  -9  -2    6.50    0.84 
  -1  -9  -2    6.25    0.73 
   1  -9   2    7.18    0.88 
   1  -9   2    4.87    0.80 
   1  -9   2    5.54    0.85 
  -1  -9  -2    5.95    0.77 
   1  -9   2    6.92    0.87 
   1  -9   2    5.65    0.78 
  -1   9  -2    5.42    0.83 
   1   9   2    6.50    0.69 
  -1   9  -2    6.25    0.89 
   1   9   2    5.29    0.74 
   1   9   2    7.01    0.80 
   1   9   2    6.80    0.75 
   1   9   2    6.11    0.76 
   1   9   2    6.44    0.75 
  -1   9  -2    6.25    0.85 
  -1   9  -2    7.77    0.86 
   1   9   2    7.06    0.76 
  -1   9  -2    4.02    0.89 
   1   9   2    7.44    0.87 
  -1   9  -2    5.64    0.71 
  -1   9  -2    7.10    0.68 
   1   9   2    6.94    0.51 
   1   9   2    7.13    0.79 
   1   9   2    7.36    0.88 
   1   9   2    5.99    0.71 
  -1   9  -2    7.14    0.78 
   2  -9   2  147.04    6.67 
   2  -9   2  146.83    6.65 
  -2  -9  -2  140.56    6.03 
  -2  -9  -2  142.19    6.11 
  -2  -9  -2  146.75    6.01 
   2  -9   2  140.44    6.55 
   2  -9   2  144.86    6.66 
   2  -9   2  143.99    6.63 
  -2  -9  -2  144.80    6.15
[truncated: 2,608,656 more chars]
